# Supplementary material for: Mapping the global distribution and conservation status of oases—ecosystems of pivotal biocultural relevance
Source: PeerJ journal article supplement (doi:10.7717/peerj.18884), 2025-02-28
Supplement: Sup_Fig_S1.pdf [file Sup_Fig_S1.pdf]

Supplementary Material Figure S1:

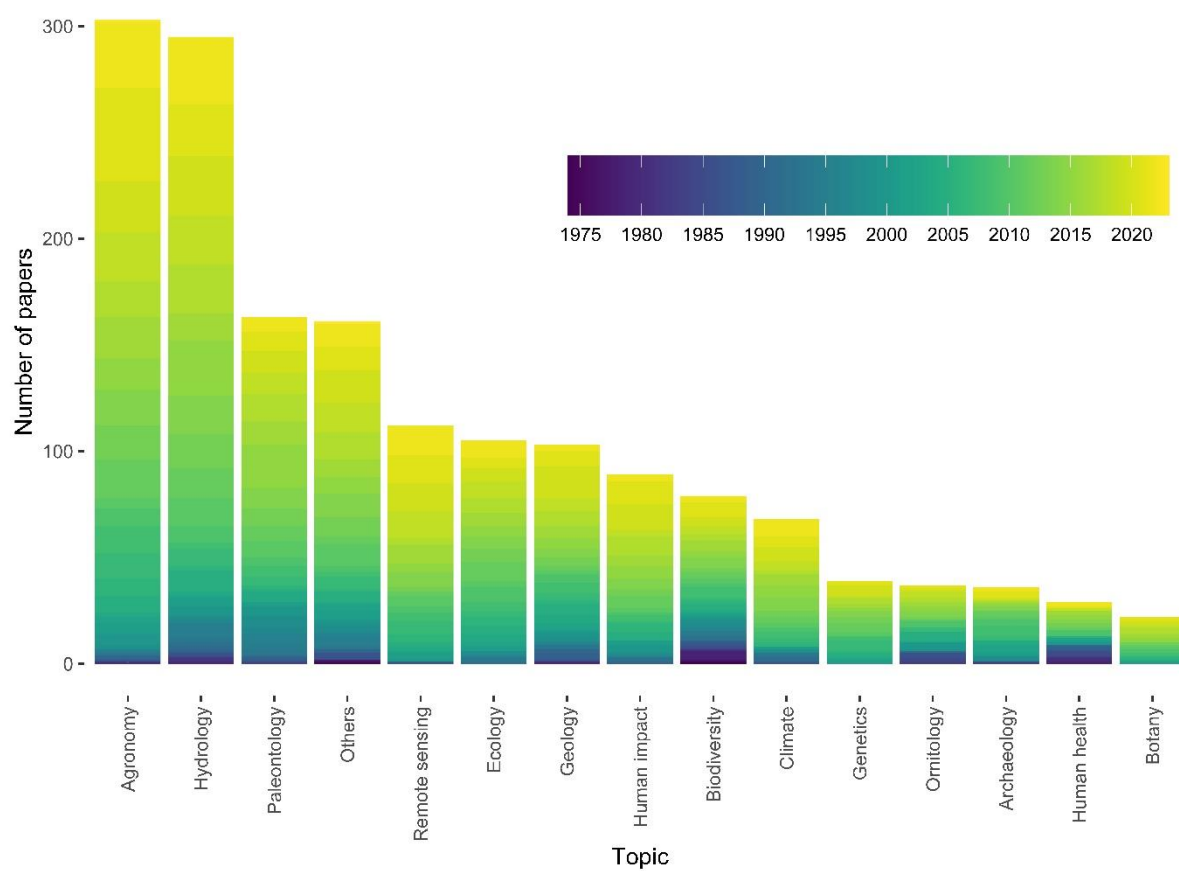

Figure S1: Number of papers per topic included in the database. Topics with less than 20 papers each were aggregated ('others'). Color gradient represents the year of publication of each paper and topic (period: 1975 to 2023).
