# Supplementary material for: Mapping the global distribution and conservation status of oases—ecosystems of pivotal biocultural relevance
Source: PeerJ journal article supplement (doi:10.7717/peerj.18884), 2025-02-28
Supplement: Sup_Table_S1.xlsx [file Sup_Table_S1.xlsx]

## Sheet: Sheet1
Search	Name	Authors	Year	Title	Journal	Volume	Issue	Pages	DOI	Oases	lat	long	Country	Topic	Hypothesis/Aims	Methodology	Results	Human uses	Plant species	Origin	notes	Reviewer
Algeria & Oasis	Abdelbakia et al (2022)	Houria Abdelbakia, Abdeldjalil Belkendilb, Abdelhak Maazouzia, Abderrahmane Mekkaoui	2022	Assessment of hydrochemical properties of groundwater in the alluvialaquifer of the arid zone of the Igli Region, South-West of Algeria	Desalination and Water Treatment	268		153–169	10.5004/dwt.2022.28709	Igli	30.446697	-2.282433	Algeria	Hydrochemistry	Desert region, always experienced water quantity and quality problems. The latter situation is only the result of population growth, expansion of the indus-trial sector, and agricultural development.	evaluate the infero-flow aquifer of 16 sampling sites	Slight alkalinity characterizes the groundwater. human factor is responsible for the discharge of untreated urban wastewater and septic tanks arbitrarily located in the study area			Wadi		MF
Algeria & Oasis	Berkouk et al (2022)	Djihed Berkouk , Tallal Abdel Karim Bouzir, Samiha Boucherit, Sara Khelil, Chafik Mahaya, Mohamed Elhadi Matallah, Said Mazouz	2022	Exploring the Multisensory Interaction between Luminous, Thermal and Auditory Environments through the Spatial Promenade Experience: A Case Study of a University Campus in an Oasis Settlement	sustainability	14		4013	10.3390/su14074013	Biskra oasis	34.833333	5.750000	Algeria	Climate	This paper aimed to develop a multisensory approach in a university campus, based on quantitative and qualitative approaches, investigating sense walk experiences (thermo-visual sound walk) under interactions of luminous, thermal, and auditory environments	The study was conducted in October 2021, in Chetma university campus in Biskra city, southern Algeria, which remains a famous oasis settlement of arid regions over the country. A comparative and correlation analysis was performed between the physical dimensions collected through a walking experience in three campus routes (outdoor, semi-outdoor and indoor). In addition, a multisensory survey of t…	The paper shows that walkers’ thermal levels were balanced between neural and slightly hot in different spatial aspects. The glare was almost unperceived regarding the luminous conditions in the study site.					JAHA
Algeria & Oasis	Chu et al (2005)	Peter C. Chu, Shihua Lu, Yuchun Chen	2005	A numerical modeling study on desert oasis self-supporting mechanisms	Journal of Hydrology	312		256-276	10.1016/j.jhydrol.2005.02.043	Ahreme	25.454826	8.419800	Algeria									JAHA
Algeria & Oasis	Deghiche-Diab et al (2022)	Nacima Deghiche-Diab, Hani Amir Aouissi, Tesnim Deghiche	2022	First record of the sawfly Athalia cornubiae Benson, 1931 (Hymenoptera: Tenthredinidae) in the oasis of Ziban	Journal of Ecology	0		1-4	10.1111/aje.13067	El Hadjeb	34.806146	5.654864	Algeria	Ecology	quinoa is implementedas a crop in a region, the polyphagous pests may constitute a widerange of potential pests, native insects maybecome adapted	survey of insect species associated with the newly cultivated cropin the region 2018 and 2019	The impact ofA. cornubiaeon the Algerian economy is undeter-mined. Although no species of Athalia has been reported as a pest ofeconomic importance on Quinoa or other crops in previous works		Chenopodium quinoa	Wadi	Athalia cornubiae	MF
Algeria & Oasis	Faci (2019)	Mohammed Faci	2019	Typology and varietal biodiversity of date palm farms in the North-East of Algerian Sahara	Journal of Taibah University for Science	13	1	764-771	10.1080/16583655.2019.1633006	Ouargla oasis	31.966667	5.333333	Algeria	Agronomy	we aimed to identify the different types of date palm groves. In a second step, we speculate on the future agro-biodiversity of the date palm varieties.			date palm	Phoenix dactylifera			JAHA
Algeria & Oasis	Guezoul et al 2013	Omar Guezoul, Haroun Chenchouni, Makhlouf Sekour, Labed Ababsa, Karim Souttou, Salaheddine Doumandji	2013	An avifaunal survey of mesic manmade ecosystems ‘‘Oases’’ in algerian hot-hyperarid lands	Saudi Journal of Biological Sciences	20		37-43	10.1016/j.sjbs.2012.10.001	Oued Souf oasis	33.365293	6.854822	Algeria	Diversity	An updated assessment of bird diversity in the oases	Diversity census	59 species of birds were recorded from all the surveyed oases that represents 16.9% of total Algerian species	Date palm grove plantations		Subterranean water	Falco peregrinus,Tyto alba,Athene noctua,Columba livia,Streptopelia turtur,Streptopelia decaocto,Streptopelia senegalensis,Merops apiaster,Upupa epops,Lanius meridionalis,Lanius senator,Ammomanes deserti,Hirundo rustica,Corvus corax,Phylloscopus collybita,Phylloscopus fuscatus,Sturnus vulgaris,Hippolais pallida,Sylvia deserticola,Sylvia melanocephala,Turdus merula,Phoenicurus phoenicurus,Oenanthe…	JAHA
Algeria & Oasis	Guezoul et al 2013	Omar Guezoul, Haroun Chenchouni, Makhlouf Sekour, Labed Ababsa, Karim Souttou, Salaheddine Doumandji	2013	An avifaunal survey of mesic manmade ecosystems ‘‘Oases’’ in algerian hot-hyperarid lands	Saudi Journal of Biological Sciences	20		37-43	10.1016/j.sjbs.2012.10.001	Ouargla oasis	31.966667	5.333333	Algeria	Diversity	An updated assessment of bird diversity in the oases	Diversity census	60 species of birds were recorded from all the surveyed oases that represents 16.9% of total Algerian species	Date palm grove plantations			Falco biarmicus,Falco peregrinus,Tyto alba,Bubo ascalaphus,Athene noctua,Columba livia,Streptopelia turtur,Streptopelia decaocto,Streptopelia senegalensis,Merops apiaster,Upupa epops,Lanius meridionalis,Lanius senator,Ammomanes cincturus,Ammomanes deserti,Hirundo rustica,Delichon urbica,Oriolus oriolus,Corvus corax,Phylloscopus collybita,Phylloscopus fuscatus,Acrocephalus schoenobaenus,Hippolais …	JAHA
Algeria & Oasis	Guezoul et al 2013	Omar Guezoul, Haroun Chenchouni, Makhlouf Sekour, Labed Ababsa, Karim Souttou, Salaheddine Doumandji	2013	An avifaunal survey of mesic manmade ecosystems ‘‘Oases’’ in algerian hot-hyperarid lands	Saudi Journal of Biological Sciences	20		37-43	10.1016/j.sjbs.2012.10.001	Biskra oasis	34.833333	5.750000	Algeria	Diversity	An updated assessment of bird diversity in the oases	Diversity census	61 species of birds were recorded from all the surveyed oases that represents 16.9% of total Algerian species	Date palm grove plantations	Phoenix dactylifera,Casuarina torulosa,Eucalyptus sp,Tamarix gallica		Alectoris barbara,Falco tinnunculus,Tyto alba,Bubo ascalaphus,Athene noctua saharae,Columba livia,Columba palumbus,Streptopelia turtur,Streptopelia decaocto,Streptopelia senegalensis,Merops persicus,Merops apiaster,Upupa epops,Lanius meridionalis,Lanius senator,Parus caeruleus,Ammomanes cincturus,Ammomanes deserti,Galerida cristata,Pycnonotus barbatus,Corvus corax,Phylloscopus collybita,Phyllosco…	JAHA
Algeria & Oasis	Harkat et al (2022)	Hamza Harkat, Ratiba Bousba, Cinzia Benincasa , Kamel Atrouz , Mine Gültekin- zgüven, mit Altuntas, Evren Demircan, Hamdy A. Zahran, Beraatz elik	2022	Assessment of Biochemical Composition and Antioxidant Properties of Algerian Date Palm (Phoenix dactylifera L.) Seed Oil	plants	11		381	10.3390/plants11030381	Biskra oasis	34.833333	5.750000	Algeria	Agronomy	we present an in-depth characterization of the biochemical composition and antioxidant properties of date palm seed oil (DPSO) produced in Algeria	DPSOs of eight Algerian cultivars, Arechti, Degla-Baida, Deglet-Nour, Ghars, Haloua, Itima, Mech-Degla, and Tentbouchet, were investigated to determine their biochemical compositions and antioxidant properties	The results highlight the potential of DPSO as an alternative food and a natural resource, thanks to several important compounds having high antioxidant capacity. In particular, fatty acids and triacylglycerol (TAGs) analyses showed that oleic (42.74–50.19%), lauric (18.40–22.2%), and myristic (8.83–10.17%) were the major fatty acids, while 1-myristoyl 2-oleoyl 3-linoleoyl glycerol, 1-linolenoyl …					JAHA
Algeria & Oasis	Matallah et al (2020)	Mohamed Elhadi Matallah , Djamel Alkama, Atef Ahriz, Shady Attia	2020	Assessment of the Outdoor Thermal Comfort in Oases Settlements	atmosphere	11	185		10.3390/atmos11020185	Tolga	34.716667	5.383333	Algeria	Climate	this study aimed to assess thermal comfort in the Tolga Oasis Complex and test the validity of the ‘oasis e ect’ concept	The methodology is based on comparative field measurement and calculation approaches in the heart of Tolga Palm Grove and in diferent urban settlements.	Results indicate highest heat stress levels (Physiologically Equivalent Temperature (PET) index) in the oases Palm Grove in July, PET = 41.7 C, and urban settlements, PET = 40.9 C. Despite the significant di erence between the old and new settlement fabrics, our measurements and calculation did not identify any noticeable variation of thermal comfort	date palm	Phoenix dactylifera,Ficus rubiginosa			JAHA
Algeria & Oasis	Matallah et al (2022)	Mohamed Elhadi Matallah , Hicham Fawzi Arrar, Mohammed Faci , Waqas Ahmed Mahar ,Fatima Zahra Ben Ratmia, Shady Attia	2022	Assessment of Human Outdoor Thermal Comfort in a Palm Grove during the Date Palm Phenological Cycle	atmosphere	18		379	10.3390/atmos13030379	Tolga	34.746265	5.384097	Algeria	Climate	This study investigated human outdoor thermal comfort in a palm grove of the Tolga region, Algeria, during the phenological cycle of the date palm	For this study, an area of 21 hectares with 220 palm trees was selected. The phenological cycle of the date palm was divided into three growth stages, including seasonal variations as well. The cycle covers a period of 8 months from March to November. Therefore, on-site monitoring of the microclimate was performed during March–November 2021. The climatic factors of air temperature and humidity we…	The results showed that the cultivators work under extreme temperatures for 5.5 months during the phenological cycle. The spring period was more comfortable, while slight to extreme discomfort was observed in the summer and fall seasons, especially between midday and 7 p.m	date palm	Phoenix dactylifera			JAHA
Algeria & Oasis	Moussi et al. 2011	Abdelhamid Moussi, Abderrahmane Abba , Abboud Harrat & Daniel Petit	2011	Desert acridian fauna (Orthoptera, Acridomorpha): Comparison between steppic and oasian habitats in Algeria	Comptes Rendus Biologies	334		158-167	10.1016/j.crvi.2010.12.001	Oued Djedi Wadi in Zab El-Guebli	34.632700	5.482323	Algeria	Diversity	Variation of Orthoptera diversity among different enviromental variables	Diversity census	The authors highlighted within the oases two acridian assemblages, which are both different from those observed on the level of the steppes. In the wet biotopes of the oases, the most frequent phenology is the usual one retrieved in non-Mediterranean temperate areas	palm plantation	Peganum harmala,Suaeda vera,Zygophyllum album,Atriplex halimus,Mesembryanthemum nodiflorum,Salsola tetragona,Salsola vermiculata,Limoniastrum guyonianum,Diplotaxis ollivieri,Lycium intricatum,Moricandia suffruticosa,Cynodon dactylon,Launeaea nudicaulis,Malva parviflora,Phalaris minor,Phoenix dactylifera,Schismus barbatus,Sonchus oleraceus,Limonium sinuatum,Polycarpaea robbairea,Chenopodium vulvar…		Acinipe algeriensis,Acrida turrita,Acrotylus longipes,Acrotylus patruelis,Aiolopus simulatrix,Aiolopus thalassinus,Anacridium aegyptium,Calliptamus barbarus,Dericorys millierei,Dociostaurus nov sp,Duroniella lucasi,Egnatioides striatus,Eremogryllus hammadae,Eyprepocnemis plorans,Heteracris adspersa,Heteracris annulosa,Heteracris harterti,Hilethera aeolopoides,Hyalorrhipis calcarata,Leptopternis r…	JAHA
Algeria & Oasis	Oumata et al (2022)	Sabrina Oumata, Philippe Monneveux, Maria Zaharieva, Leila Mekliche-Hanifi & Jacques David	2022	Variation of morphological traits among wheat (Triticum aestivum L.) landraces from two regions of the Algerian Sahara. Potential interest for wheat breeding	Genetic Resources and Crop Evolution	70		235-250	10.1007/s10722-022-01429-z	Adrar	27.859014	-0.302480	Algeria	Agronomy	Morphological characteristics of Sahara wheat landraces	Analysis of 58 bread wheat landraces originating from ten oases together with two commercial varieties, for 21 quantitative traits related to plant, spike, grain, glume and lemma.	A wide morphological variation was noted among landraces, as well as differences related to their environments of origin. Altitude was a determining factor of variation	bread wheat landraces		Groundwater		MF
Algeria & Oasis	Oumata et al (2022)	Sabrina Oumata, Philippe Monneveux, Maria Zaharieva, Leila Mekliche-Hanifi & Jacques David	2022	Variation of morphological traits among wheat (Triticum aestivum L.) landraces from two regions of the Algerian Sahara. Potential interest for wheat breeding	Genetic Resources and Crop Evolution	70		235-250	10.1007/s10722-022-01429-z	Bouda	27.963173	-0.433162	Algeria	Agronomy	Morphological characteristics of Sahara wheat landraces	Analysis of 58 bread wheat landraces originating from ten oases together with two commercial varieties, for 21 quantitative traits related to plant, spike, grain, glume and lemma.	A wide morphological variation was noted among landraces, as well as differences related to their environments of origin. Altitude was a determining factor of variation	bread wheat landraces		Groundwater		MF
Algeria & Oasis	Oumata et al (2022)	Sabrina Oumata, Philippe Monneveux, Maria Zaharieva, Leila Mekliche-Hanifi & Jacques David	2022	Variation of morphological traits among wheat (Triticum aestivum L.) landraces from two regions of the Algerian Sahara. Potential interest for wheat breeding	Genetic Resources and Crop Evolution	70		235-250	10.1007/s10722-022-01429-z	Timmi	27.819670	-0.293595	Algeria	Agronomy	Morphological characteristics of Sahara wheat landraces	Analysis of 58 bread wheat landraces originating from ten oases together with two commercial varieties, for 21 quantitative traits related to plant, spike, grain, glume and lemma.	A wide morphological variation was noted among landraces, as well as differences related to their environments of origin. Altitude was a determining factor of variation	bread wheat landraces		Groundwater		MF
Algeria & Oasis	Oumata et al (2022)	Sabrina Oumata, Philippe Monneveux, Maria Zaharieva, Leila Mekliche-Hanifi & Jacques David	2022	Variation of morphological traits among wheat (Triticum aestivum L.) landraces from two regions of the Algerian Sahara. Potential interest for wheat breeding	Genetic Resources and Crop Evolution	70		235-250	10.1007/s10722-022-01429-z	Tamantit	27.716981	-0.276960	Algeria	Agronomy	Morphological characteristics of Sahara wheat landraces	Analysis of 58 bread wheat landraces originating from ten oases together with two commercial varieties, for 21 quantitative traits related to plant, spike, grain, glume and lemma.	A wide morphological variation was noted among landraces, as well as differences related to their environments of origin. Altitude was a determining factor of variation	bread wheat landraces		Groundwater		MF
Algeria & Oasis	Oumata et al (2022)	Sabrina Oumata, Philippe Monneveux, Maria Zaharieva, Leila Mekliche-Hanifi & Jacques David	2022	Variation of morphological traits among wheat (Triticum aestivum L.) landraces from two regions of the Algerian Sahara. Potential interest for wheat breeding	Genetic Resources and Crop Evolution	70		235-250	10.1007/s10722-022-01429-z	Tsabit	28.349650	-0.227575	Algeria	Agronomy	Morphological characteristics of Sahara wheat landraces	Analysis of 58 bread wheat landraces originating from ten oases together with two commercial varieties, for 21 quantitative traits related to plant, spike, grain, glume and lemma.	A wide morphological variation was noted among landraces, as well as differences related to their environments of origin. Altitude was a determining factor of variation	bread wheat landraces		Groundwater		MF
Algeria & Oasis	Oumata et al (2022)	Sabrina Oumata, Philippe Monneveux, Maria Zaharieva, Leila Mekliche-Hanifi & Jacques David	2022	Variation of morphological traits among wheat (Triticum aestivum L.) landraces from two regions of the Algerian Sahara. Potential interest for wheat breeding	Genetic Resources and Crop Evolution	70		235-250	10.1007/s10722-022-01429-z	Timimoun	29.265622	0.222565	Algeria	Agronomy	Morphological characteristics of Sahara wheat landraces	Analysis of 58 bread wheat landraces originating from ten oases together with two commercial varieties, for 21 quantitative traits related to plant, spike, grain, glume and lemma.	A wide morphological variation was noted among landraces, as well as differences related to their environments of origin. Altitude was a determining factor of variation	bread wheat landraces		Groundwater		MF
Algeria & Oasis	Oumata et al (2022)	Sabrina Oumata, Philippe Monneveux, Maria Zaharieva, Leila Mekliche-Hanifi & Jacques David	2022	Variation of morphological traits among wheat (Triticum aestivum L.) landraces from two regions of the Algerian Sahara. Potential interest for wheat breeding	Genetic Resources and Crop Evolution	70		235-250	10.1007/s10722-022-01429-z	Abalessa	22.888965	4.851074	Algeria	Agronomy	Morphological characteristics of Sahara wheat landraces	Analysis of 58 bread wheat landraces originating from ten oases together with two commercial varieties, for 21 quantitative traits related to plant, spike, grain, glume and lemma.	A wide morphological variation was noted among landraces, as well as differences related to their environments of origin. Altitude was a determining factor of variation	bread wheat landraces		Groundwater		MF
Algeria & Oasis	Oumata et al (2022)	Sabrina Oumata, Philippe Monneveux, Maria Zaharieva, Leila Mekliche-Hanifi & Jacques David	2022	Variation of morphological traits among wheat (Triticum aestivum L.) landraces from two regions of the Algerian Sahara. Potential interest for wheat breeding	Genetic Resources and Crop Evolution	70		235-250	10.1007/s10722-022-01429-z	Ideles	23.819778	5.931547	Algeria	Agronomy	Morphological characteristics of Sahara wheat landraces	Analysis of 58 bread wheat landraces originating from ten oases together with two commercial varieties, for 21 quantitative traits related to plant, spike, grain, glume and lemma.	A wide morphological variation was noted among landraces, as well as differences related to their environments of origin. Altitude was a determining factor of variation	bread wheat landraces		Groundwater		MF
Algeria & Oasis	Oumata et al (2022)	Sabrina Oumata, Philippe Monneveux, Maria Zaharieva, Leila Mekliche-Hanifi & Jacques David	2022	Variation of morphological traits among wheat (Triticum aestivum L.) landraces from two regions of the Algerian Sahara. Potential interest for wheat breeding	Genetic Resources and Crop Evolution	70		235-250	10.1007/s10722-022-01429-z	In Amguel	23.694269	5.152646	Algeria	Agronomy	Morphological characteristics of Sahara wheat landraces	Analysis of 58 bread wheat landraces originating from ten oases together with two commercial varieties, for 21 quantitative traits related to plant, spike, grain, glume and lemma.	A wide morphological variation was noted among landraces, as well as differences related to their environments of origin. Altitude was a determining factor of variation	bread wheat landraces		Groundwater		MF
Algeria & Oasis	Oumata et al (2022)	Sabrina Oumata, Philippe Monneveux, Maria Zaharieva, Leila Mekliche-Hanifi & Jacques David	2022	Variation of morphological traits among wheat (Triticum aestivum L.) landraces from two regions of the Algerian Sahara. Potential interest for wheat breeding	Genetic Resources and Crop Evolution	70		235-250	10.1007/s10722-022-01429-z	Tamanrasse	22.782985	5.531405	Algeria	Agronomy	Morphological characteristics of Sahara wheat landraces	Analysis of 58 bread wheat landraces originating from ten oases together with two commercial varieties, for 21 quantitative traits related to plant, spike, grain, glume and lemma.	A wide morphological variation was noted among landraces, as well as differences related to their environments of origin. Altitude was a determining factor of variation	bread wheat landraces		Groundwater		MF
Algeria & Oasis	Sadraoui-Ajm et al (2021)	Insaf Sadraoui-Ajmi,NejibBenali, Abir Soltani, Samira Chaib, Essia Limem, Slim Jallouli, Emna Boushih, Abdallah Fajraoui,Jouda Mediouni-Ben Jemaa	2021	Usage of agricultural DAPfertilizer and Eucalyptus essential oils as potential attractants against the Mediterranean fruit fly Ceratitis capitata (Tephritidae)	proceedings	25	1	101857	10.1016/j.aspen.2021.101857	Gafsa	34.406361	8.769304	Tunisia	Agronomy	to develop and evaluate an attractant based on the combination of DAP and Eucalyptus essential oils	Essential oils were isolated by steam distillation from Eucalyptus species and analyzed by GC-MS.	About 12 and 22 constituents were identified with 1.8 was the major compounds in crude essential oil and formulations. The adsorption efficacy depends on the abundance of each compound in crude essential oils and the polarity of terpenic components.	orange, mandarin, clementin			Ceratitis capitata	JAHA
Algeria & Oasis	AbdelGawad et al (2021)	Mohamed K. AbdelGawad, Gebely A. Abu El-Kheir, Walid G. Kassab	2021	The youngest records of mosasaurid reptiles from the Upper Cretaceous of the South-Western Desert in Egypt	Proceedings of the Geologists’ Association	132	5	556-562	10.1016/j.pgeola.2021.07.004	Dakhla oasis	25.608174	28.916796	Egypt	Paleontology	Here new mosasaur remains from the Maastrichtian (Upper Cretaceous) of Dakhla Oasis in the South-Western Desert of Egypt are recorded, including: a small, fragmentary right dentary of an indeterminate mosasaurine with a single tooth preserved in situ and an isolated tooth crown of the genus Globidens	This material stems from fossiliferous, calcareous sandstones with intercalated shales that form the lower portion of the Dakhla Formation, known to be an intertidal to subtidal deposit.	Previously recorded mosasaur remains from the Eastern Desert in Egypt included Globidens phosphaticus, Platecarpus sp., and Igdamanosaurus aegyptiacus. In Africa, mosasaurs of the Maastrichtian age have been recorded from Morocco, Nigeria, Angola, the Democratic Republic of Congo, and Niger. The newly collected material from Dakhla Oasis currently constitutes the youngest record of mosasaurs in E…					JAHA
Algeria & Oasis	Abdellaoui et al (2021)	Abdelkader Abdellaoui, Mostafia Boughalem, Noureddine Boudjeltia	2021	Salt deposits in oasian environments: the evolution of Oum Rneb sebkha (Ouargla, Algeria)	Arabian Journal of Geosciences	14		635	doi.org/10.1007/s12517-021-06728-w	Oum Rneb	32.064395	5.343815	Algeria	Hidrology	Salt deposits and upwellings in oasis environments have several adverse effects on space and agricultural production	Satellital information	The 2005 image allowed the development of a chain of treatments based on conventional treatments (analysis of main components, classifications, channel combinations) and based on a semiempirical model					JAHA
Algeria & Oasis	Aci et al (2013)	Miyassa M Aci, Pedro Revilla, Abdelkader Morsli, Abderrahmane Djemel, Nawal Belalia, Yasser Kadri, Majda Khelifi-Saloui, Bernardo Ordás, Lakhdar Khelifi	2013	Genetic diversity in Algerian maize (Zea mays L) landraces using SSR markers	Maydica	58		304-310		El M'Ghair	33.964870	5.934419	Algeria	Genetics	determine the genetic diversity of a collection of Saharan maize	Fifteen accessions representing the geographic diversity of Algeria were characterized with 18 SSR.	Most loci (93%) were polymorphic; the total amount of alleles was 87 and the average of alleles per locus was 5.8. The total genetic diversity (He) was 0.57, being 69% intra-accessions and 31% inter-accession. Eight of the alleles were accession-specific and belonged to six populations					JAHA
Algeria & Oasis	Aci et al (2013)	Miyassa M Aci, Pedro Revilla, Abdelkader Morsli, Abderrahmane Djemel, Nawal Belalia, Yasser Kadri, Majda Khelifi-Saloui, Bernardo Ordás, Lakhdar Khelifi	2013	Genetic diversity in Algerian maize (Zea mays L) landraces using SSR markers	Maydica	58		304-310		Beni-abbes	30.124229	-2.171951	Algeria	Genetics	determine the genetic diversity of a collection of Saharan maize	Fifteen accessions representing the geographic diversity of Algeria were characterized with 18 SSR.	Most loci (93%) were polymorphic; the total amount of alleles was 87 and the average of alleles per locus was 5.8. The total genetic diversity (He) was 0.57, being 69% intra-accessions and 31% inter-accession. Eight of the alleles were accession-specific and belonged to six populations					JAHA
Algeria & Oasis	Aci et al (2013)	Miyassa M Aci, Pedro Revilla, Abdelkader Morsli, Abderrahmane Djemel, Nawal Belalia, Yasser Kadri, Majda Khelifi-Saloui, Bernardo Ordás, Lakhdar Khelifi	2013	Genetic diversity in Algerian maize (Zea mays L) landraces using SSR markers	Maydica	58		304-310		Timimoun	29.265622	0.222565	Algeria	Genetics	determine the genetic diversity of a collection of Saharan maize	Fifteen accessions representing the geographic diversity of Algeria were characterized with 18 SSR.	Most loci (93%) were polymorphic; the total amount of alleles was 87 and the average of alleles per locus was 5.8. The total genetic diversity (He) was 0.57, being 69% intra-accessions and 31% inter-accession. Eight of the alleles were accession-specific and belonged to six populations					JAHA
Algeria & Oasis	Aci et al (2013)	Miyassa M Aci, Pedro Revilla, Abdelkader Morsli, Abderrahmane Djemel, Nawal Belalia, Yasser Kadri, Majda Khelifi-Saloui, Bernardo Ordás, Lakhdar Khelifi	2013	Genetic diversity in Algerian maize (Zea mays L) landraces using SSR markers	Maydica	58		304-310		El Golea	30.575367	2.891121	Algeria	Genetics	determine the genetic diversity of a collection of Saharan maize	Fifteen accessions representing the geographic diversity of Algeria were characterized with 18 SSR.	Most loci (93%) were polymorphic; the total amount of alleles was 87 and the average of alleles per locus was 5.8. The total genetic diversity (He) was 0.57, being 69% intra-accessions and 31% inter-accession. Eight of the alleles were accession-specific and belonged to six populations					JAHA
Algeria & Oasis	Aci et al (2013)	Miyassa M Aci, Pedro Revilla, Abdelkader Morsli, Abderrahmane Djemel, Nawal Belalia, Yasser Kadri, Majda Khelifi-Saloui, Bernardo Ordás, Lakhdar Khelifi	2013	Genetic diversity in Algerian maize (Zea mays L) landraces using SSR markers	Maydica	58		304-310		Ouled Said	29.419008	0.242616	Algeria	Genetics	determine the genetic diversity of a collection of Saharan maize	Fifteen accessions representing the geographic diversity of Algeria were characterized with 18 SSR.	Most loci (93%) were polymorphic; the total amount of alleles was 87 and the average of alleles per locus was 5.8. The total genetic diversity (He) was 0.57, being 69% intra-accessions and 31% inter-accession. Eight of the alleles were accession-specific and belonged to six populations					JAHA
Algeria & Oasis	Aci et al (2013)	Miyassa M Aci, Pedro Revilla, Abdelkader Morsli, Abderrahmane Djemel, Nawal Belalia, Yasser Kadri, Majda Khelifi-Saloui, Bernardo Ordás, Lakhdar Khelifi	2013	Genetic diversity in Algerian maize (Zea mays L) landraces using SSR markers	Maydica	58		304-310		Timmi	27.766916	-0.260203	Algeria	Genetics	determine the genetic diversity of a collection of Saharan maize	Fifteen accessions representing the geographic diversity of Algeria were characterized with 18 SSR.	Most loci (93%) were polymorphic; the total amount of alleles was 87 and the average of alleles per locus was 5.8. The total genetic diversity (He) was 0.57, being 69% intra-accessions and 31% inter-accession. Eight of the alleles were accession-specific and belonged to six populations					JAHA
Algeria & Oasis	Aci et al (2013)	Miyassa M Aci, Pedro Revilla, Abdelkader Morsli, Abderrahmane Djemel, Nawal Belalia, Yasser Kadri, Majda Khelifi-Saloui, Bernardo Ordás, Lakhdar Khelifi	2013	Genetic diversity in Algerian maize (Zea mays L) landraces using SSR markers	Maydica	58		304-310		Taourit	27.859014	-0.302480	Algeria	Genetics	determine the genetic diversity of a collection of Saharan maize	Fifteen accessions representing the geographic diversity of Algeria were characterized with 18 SSR.	Most loci (93%) were polymorphic; the total amount of alleles was 87 and the average of alleles per locus was 5.8. The total genetic diversity (He) was 0.57, being 69% intra-accessions and 31% inter-accession. Eight of the alleles were accession-specific and belonged to six populations					JAHA
Algeria & Oasis	Aci et al (2013)	Miyassa M Aci, Pedro Revilla, Abdelkader Morsli, Abderrahmane Djemel, Nawal Belalia, Yasser Kadri, Majda Khelifi-Saloui, Bernardo Ordás, Lakhdar Khelifi	2013	Genetic diversity in Algerian maize (Zea mays L) landraces using SSR markers	Maydica	58		304-310		Ouled Mahmoude	28.597186	0.039593	Algeria	Genetics	determine the genetic diversity of a collection of Saharan maize	Fifteen accessions representing the geographic diversity of Algeria were characterized with 18 SSR.	Most loci (93%) were polymorphic; the total amount of alleles was 87 and the average of alleles per locus was 5.8. The total genetic diversity (He) was 0.57, being 69% intra-accessions and 31% inter-accession. Eight of the alleles were accession-specific and belonged to six populations					JAHA
Algeria & Oasis	Aci et al (2013)	Miyassa M Aci, Pedro Revilla, Abdelkader Morsli, Abderrahmane Djemel, Nawal Belalia, Yasser Kadri, Majda Khelifi-Saloui, Bernardo Ordás, Lakhdar Khelifi	2013	Genetic diversity in Algerian maize (Zea mays L) landraces using SSR markers	Maydica	58		304-310		Tamanrasset	22.782985	5.531405	Algeria	Genetics	determine the genetic diversity of a collection of Saharan maize	Fifteen accessions representing the geographic diversity of Algeria were characterized with 18 SSR.	Most loci (93%) were polymorphic; the total amount of alleles was 87 and the average of alleles per locus was 5.8. The total genetic diversity (He) was 0.57, being 69% intra-accessions and 31% inter-accession. Eight of the alleles were accession-specific and belonged to six populations					JAHA
Algeria & Oasis	Aci et al (2018)	Miyassa Meriem Aci, Antonio Lupini, Antonio Mauceri, Abdelkader Morsli, Lakhdar Khelifi, Francesco Sunseri	2018	Genetic variation and structure of maize populations from Saoura and Gourara oasis in Algerian Sahara	BMC Genetics	19		51	10.1186/s12863-018-0655-2	Saoura	29.456133	-1.428377	Algeria	Agronomy	fingerprinting of an Algerian maize collection (47 landraces) from Saharan oasis by using 24 agro-morphological traits and18 Simple Sequence Repeats to evaluate genetic diversity and population structure	genetic sequencing	significant variation in which earliness, plant size, ear and kernel features and crop yield appeared the most discriminant traits among landraces by using principal component analysis (PCA).	Zea mays	Zea mays			JAHA
Algeria & Oasis	Aci et al (2018)	Miyassa Meriem Aci, Antonio Lupini, Antonio Mauceri, Abdelkader Morsli, Lakhdar Khelifi, Francesco Sunseri	2018	Genetic variation and structure of maize populations from Saoura and Gourara oasis in Algerian Sahara	BMC Genetics	19		51	10.1186/s12863-018-0655-2	Gourara	29.262031	0.218904	Algeria	Agronomy	fingerprinting of an Algerian maize collection (47 landraces) from Saharan oasis by using 24 agro-morphological traits and18 Simple Sequence Repeats to evaluate genetic diversity and population structure	genetic sequencing	significant variation in which earliness, plant size, ear and kernel features and crop yield appeared the most discriminant traits among landraces by using principal component analysis (PCA).	Zea mays	Zea mays			JAHA
Algeria & Oasis	Adamou et al (2009)	Ala-Eddine ADAMOU, Mohamed KOUIDRI, Yassine CHABI, Joanna SKWARSKA, Jerzy BAŃBURA	2009	Egg size variation and breeding characteristics of the Black-winged Stilt Himantopus himantopus in a Saharan oasis	Acta Ornithologica	44	1	1-7	10.3161/000164509X464821	Chott Ain El Beida	32.339858	5.425384	Algeria	Ornitology	Different aspects of the breeding biology of the Black-winged Stilt were studied in a natural oasis wetland area in the Sahara Desert, the Chott of AVn El BeVda, near Ouargla, E Algeria in 2004–2007	Egg size traits (mass, length, breadth and volume) tended to decrease from 2004 to 2007, probably due to deteriorating hydrological conditions of the wetland	We found that all egg traits studied showed a negative correlation with the date of laying, which seems to be a phenomenon analogous to the seasonal decrease in clutch size, typical of birds with more variable clutch sizes				Himantopus himantopus	JAHA
Algeria & Oasis	Adamou et al (2017)	Ala-Eddine Adamou, Rabie Tabib , Mohamed Kouidri , Mohamed Laïd Ouakid , Michał Gla˛dalski , Anna Ba nbura , Jerzy Ba nbura	2017	Inter-annual variation in clutch size and laying date of Rufous Bush Chats Cercotrichas galactotes inhabiting an Algerian oasis	Journal of Arid Environments	141		40-44	10.1016/j.jaridenv.2017.01.013	Al Amri oasis	34.704974	5.322896	Algeria	Ornitology	clutch size and timing of breeding of Rufous Bush Chats Cercotrichas galactotes inhabiting Date Palm plantations in an oasis in NE Algeria with respect to interannual variation	Bird census	relatively high year-to-year variation in the life history traits analysed.				Cercotrichas galactotes	JAHA
Algeria & Oasis	Adamou et al (2018)	Ala-Eddine Adamoua, Rabie Tabib, Mohamed Kouidri, Mohamed Laïd Ouakid, Michał Glądalski, Jerzy Bańburad	2018	Egg size and shape variation in Rufous Bush Chats Cercotrichas galactotes breeding in date palm plantations: hatching success ncreases with egg elongation	Avian Biology Research	11	2	100-107	10.3184/175815618X1520281116334	Al Amri oasis	34.704974	5.322896	Algeria	Ornitology	variation in the principal component indices of egg size and shape in Rufous Bush Chats (Cercotrichas galactotes) breeding in date palm plantations in the Al Amri Oasis, north Algeria, in 2008–2009 and 2011–2013	For descriptive and comparative purposes, we also present characteristics of egg length, breadth, volume, shape and mass.	The size and shape indices as well as dimensions and masses of the eggs laid by particular females tended to be similar to one another, with most variation occurring between clutches (significant repeatabilities for all egg traits).	Phoenix dactylifera, Ficus carica, Punica granatum	Phoenix dactylifera,Ficus carica,Punica granatum		Genetta genetta,Natrix maura,Hemorrhois hippocrepis,Cercotrichas galactotes	JAHA
Algeria & Oasis	Agoudjil et al (2011)	Boudjemaa Agoudjil,, Adel Benchabane, Abderrahim Boudenne, Laurent Ibos, Magali Fois	2011	Renewable materials to reduce building heat loss: Characterization of date palm wood	Energy and Buildings	43		491-497	10.1016/j.enbuild.2010.10.014	Mekhadma	34.645139	5.489587	Algeria	Energy	to use this natural material in the manufacture of thermal insulation for buildings	Scanning electron microscopy (SEM) and energy dispersive spectroscopy (EDS) analysis of the date palm wood were investigated to characterize the microstructure and the chemical composition of the samples. A simultaneous determination of the thermal conductivity and the diffusivity was achieved using a periodic method. The relative permittivity was obtained from capacitance measurements performed …	the surfaces of the samples are irregular with many filaments, impurities, cells and pores. The effect of the fibers orientation was significant on the relative permittivity when compared to the thermal conductivity of the date palm wood					JAHA
Algeria & Oasis	Aissa et al (2017)	N. Baba Aissa, S.E. Doumandji, M.J. Ebejer	2017	First records of Aphaniosoma Becker (Diptera: Chyromyidae) from Algeria	African Entomology	25	2	481-484	10.4001/003.025.0481	Guerrera	32.781166	4.497288	Algeria	Diversity	Diversity of Aphaniosoma in Argelian oasis	Census	A total of 266 individuals were identified to five species belonging to Aphaniosoma				Aphaniosoma annulatum,Aphaniosoma approximatum,Aphaniosoma fissum,Aphaniosoma nigricauda	JAHA
Algeria & Oasis	Aissa et al (2017)	N. Baba Aissa, S.E. Doumandji, M.J. Ebejer	2017	First records of Aphaniosoma Becker (Diptera: Chyromyidae) from Algeria	African Entomology	25	2	481-484	10.4001/003.025.0481	Zelfana	32.394470	4.211059	Algeria	Diversity	Diversity of Aphaniosoma in Argelian oasis	Census	A total of 266 individuals were identified to five species belonging to Aphaniosoma				Aphaniosoma annulatum,Aphaniosoma approximatum,Aphaniosoma fissum,Aphaniosoma nigricauda	JAHA
Algeria & Oasis	Aissa et al (2017)	N. Baba Aissa, S.E. Doumandji, M.J. Ebejer	2017	First records of Aphaniosoma Becker (Diptera: Chyromyidae) from Algeria	African Entomology	25	2	481-484	10.4001/003.025.0481	Tadjnint	32.440600	3.740492	Algeria	Diversity	Diversity of Aphaniosoma in Argelian oasis	Census	A total of 266 individuals were identified to five species belonging to Aphaniosoma				Aphaniosoma annulatum,Aphaniosoma approximatum,Aphaniosoma fissum,Aphaniosoma nigricauda	JAHA
Algeria & Oasis	Aissa et al (2017)	N. Baba Aissa, S.E. Doumandji, M.J. Ebejer	2017	First records of Aphaniosoma Becker (Diptera: Chyromyidae) from Algeria	African Entomology	25	2	481-484	10.4001/003.025.0481	Ghardaia	32.502160	3.642881	Algeria	Diversity	Diversity of Aphaniosoma in Argelian oasis	Census	A total of 266 individuals were identified to five species belonging to Aphaniosoma				Aphaniosoma annulatum,Aphaniosoma approximatum,Aphaniosoma fissum,Aphaniosoma nigricauda	JAHA
Algeria & Oasis	Allam & Cheloufi (2013)	Abdelkader ALLAM, Hamid CHELOUFI	2013	Biodiversity of fruit species in the valley of Oued Righ: the case of the area of Touggourt (Algeria)	Fruits	68		33-37	10.1051/fruits/2012048	Nezla	33.063936	6.062704	Algeria	Agronomy	To preserve the genetic heritage, we undertook the first work on the inventory of fruit species crops in the region of Touggourt in south-eastern Algeria	Our working methods were based on surveys carried out on farms in the Oued Righ region according to a questionnaire that met our objectives. For this, we divided the study region into three zones and in each zone we selected ten farms for the inventory of fruit species cultivated.	The results of our investigations allowed us to identify thirteen species, including four species with a wide distribution (pomegranate tree, apricot tree, fig tree and vine). The local genetic diversity of these species is little known.	Punica granatum, Ficus carica, Oleae europae, Prunus armeniaca, Prunus domestica, Malus domestica, Prunus persica, Vitis vinifera, Cydonia oblonga, Prunus persica, Mespilus germanica, Pyrus communis,	Punica granatum,Ficus carica,Oleae europae,Prunus armeniaca,Prunus domestica,Malus domestica,Prunus persica,Vitis vinifera,Cydonia oblonga,Prunus persica,Mespilus germanica,Pyrus communis			JAHA
Algeria & Oasis	Allam & Cheloufi (2013)	Abdelkader ALLAM, Hamid CHELOUFI	2013	Biodiversity of fruit species in the valley of Oued Righ: the case of the area of Touggourt (Algeria)	Fruits	68		33-37	10.1051/fruits/2012048	Tebesbest	33.115116	6.099457	Algeria	Agronomy	To preserve the genetic heritage, we undertook the first work on the inventory of fruit species crops in the region of Touggourt in south-eastern Algeria	Our working methods were based on surveys carried out on farms in the Oued Righ region according to a questionnaire that met our objectives. For this, we divided the study region into three zones and in each zone we selected ten farms for the inventory of fruit species cultivated.	The results of our investigations allowed us to identify thirteen species, including four species with a wide distribution (pomegranate tree, apricot tree, fig tree and vine). The local genetic diversity of these species is little known.	Punica granatum, Ficus carica, Oleae europae, Prunus armeniaca, Prunus domestica, Malus domestica, Prunus persica, Vitis vinifera, Morus sp., Cydonia oblonga, Prunus persica, Pyrus communis, Citrus sinensis	Punica granatum,Ficus carica,Oleae europae,Prunus armeniaca,Prunus domestica,Malus domestica,Prunus persica,Vitis vinifera,Morus sp,Cydonia oblonga,Prunus persica,Pyrus communis,Citrus sinensis			JAHA
Algeria & Oasis	Allam & Cheloufi (2013)	Abdelkader ALLAM, Hamid CHELOUFI	2013	Biodiversity of fruit species in the valley of Oued Righ: the case of the area of Touggourt (Algeria)	Fruits	68		33-37	10.1051/fruits/2012048	Zaouia	33.146087	6.092864	Algeria	Agronomy	To preserve the genetic heritage, we undertook the first work on the inventory of fruit species crops in the region of Touggourt in south-eastern Algeria	Our working methods were based on surveys carried out on farms in the Oued Righ region according to a questionnaire that met our objectives. For this, we divided the study region into three zones and in each zone we selected ten farms for the inventory of fruit species cultivated.	The results of our investigations allowed us to identify thirteen species, including four species with a wide distribution (pomegranate tree, apricot tree, fig tree and vine). The local genetic diversity of these species is little known.	Punica granatum, Ficus carica, Oleae europae, Prunus armeniaca, Prunus domestica, Malus domestica, Prunus persica, Vitis vinifera, Morus sp., Pyrus communis, Citrus sinensis	Punica granatum,Ficus carica,Oleae europae,Prunus armeniaca,Prunus domestica,Malus domestica,Prunus persica,Vitis vinifera,Morus sp,Pyrus communis,Citrus sinensis			JAHA
Algeria & Oasis	Arbi et al (2015)	Souad Baba Arbi, Djamel Chekireb, Paola Quatrini, Valentina Catania, Dahbia Cheriet, Akila Ouartsi1	2015	Phenotypic and genotypic characterization of root nodules rhizobia of Medicago littoralis Rhode and Melilotus indicus (L.) All. growing in the Oasis of Touggourt, Oued Righ Valley, in the Algerian Sahara	Symbiosis	66		75-87	10.1007/s13199-015-0336-0	Touggourt	33.114837	6.091385	Algeria	Agronomy	rhizobia of medicago and melilotus	genetic sequencing	Forty rhizobial strains were isolated from root nodules of Medicago littoralis Rhode and Melilotus indicus (L.) harvested from the sandy soils of Touggourt’s oases in the Oued Righ Valley, Algerian Sahara.		Medicago littoralis,Melilotus indicus			JAHA
Algeria & Oasis	Bakelli & Kaabeche (2019)	Yahia Bakelli, Abdelhamid Kaabeche	2019	Optimal size of photovoltaic pumping system using nature‐ inspired algorithms	International Journal of Zoology and Research	e12045		1-24	10.1002/2050-7038.12045	Ghardaia	32.502160	3.642881	Algeria	Energy	overcome such difficult optimization problems has been proposed	Optimal design model using metaheuristic techniques, For this purpose, various well‐known metaheuristic algorithms have been used, namely: ant lion optimizer (ALO), bat algorithm (BA), cuckoo search algorithm (CSA), and gray wolf optimization algorithm (GWO). To provide optimal system configurations, an objective function based on the total net present cost (TNPC) has been specified while taking …	The simulation results show the effectiveness of the GWO algorithm over the other algorithms. GWO converges toward the optimal solutions for different heads and all reliability levels required by the customer					JAHA
Algeria & Oasis	Balducci et al (2014)	Catia Balducci , Riad Ladji, Valeria Muto, Paola Romagnoli, Nourredine Yassaa, Angelo Cecinato	2014	Biogenic and anthropogenic organic components of Saharan sands	Chemosphere	107		129-135	10.1016/j.chemosphere.2014.02.069	Biskra oasis	34.833333	5.750000	Algeria	human impact	Till now, the Sahara desert sands have scarcely characterized for their organic contents, despite they are known to heavily affect Europe and America when transported by winds.	the composition of sands collected in ten oasis lying in two regions of the Algerian Sahara during 2011 was investigated with regards to organic fraction. Attention was paid to anthropogenic and biogenic sources of organics associated to sands, through the characterization of n-alkanes, n-alkanoic and n-alkanedioic acids, n-alkanols, sterols, PAHs and caffeine.	The organic fraction load on sands associable to natural sources was higher in the Region of Biskra than in that of Ouargla					JAHA
Algeria & Oasis	Balducci et al (2014)	Catia Balducci , Riad Ladji, Valeria Muto, Paola Romagnoli, Nourredine Yassaa, Angelo Cecinato	2014	Biogenic and anthropogenic organic components of Saharan sands	Chemosphere	107		129-135	10.1016/j.chemosphere.2014.02.069	Al Amri oasis	34.704974	5.322896	Algeria	human impact	Till now, the Sahara desert sands have scarcely characterized for their organic contents, despite they are known to heavily affect Europe and America when transported by winds.	the composition of sands collected in ten oasis lying in two regions of the Algerian Sahara during 2011 was investigated with regards to organic fraction. Attention was paid to anthropogenic and biogenic sources of organics associated to sands, through the characterization of n-alkanes, n-alkanoic and n-alkanedioic acids, n-alkanols, sterols, PAHs and caffeine.	The organic fraction load on sands associable to natural sources was higher in the Region of Biskra than in that of Ouargla					JAHA
Algeria & Oasis	Balducci et al (2014)	Catia Balducci , Riad Ladji, Valeria Muto, Paola Romagnoli, Nourredine Yassaa, Angelo Cecinato	2014	Biogenic and anthropogenic organic components of Saharan sands	Chemosphere	107		129-135	10.1016/j.chemosphere.2014.02.069	Tolga	34.746265	5.384097	Algeria	human impact	Till now, the Sahara desert sands have scarcely characterized for their organic contents, despite they are known to heavily affect Europe and America when transported by winds.	the composition of sands collected in ten oasis lying in two regions of the Algerian Sahara during 2011 was investigated with regards to organic fraction. Attention was paid to anthropogenic and biogenic sources of organics associated to sands, through the characterization of n-alkanes, n-alkanoic and n-alkanedioic acids, n-alkanols, sterols, PAHs and caffeine.	The organic fraction load on sands associable to natural sources was higher in the Region of Biskra than in that of Ouargla					JAHA
Algeria & Oasis	Balducci et al (2014)	Catia Balducci , Riad Ladji, Valeria Muto, Paola Romagnoli, Nourredine Yassaa, Angelo Cecinato	2014	Biogenic and anthropogenic organic components of Saharan sands	Chemosphere	107		129-135	10.1016/j.chemosphere.2014.02.069	Bir Naam	34.757778	5.118333	Algeria	human impact	Till now, the Sahara desert sands have scarcely characterized for their organic contents, despite they are known to heavily affect Europe and America when transported by winds.	the composition of sands collected in ten oasis lying in two regions of the Algerian Sahara during 2011 was investigated with regards to organic fraction. Attention was paid to anthropogenic and biogenic sources of organics associated to sands, through the characterization of n-alkanes, n-alkanoic and n-alkanedioic acids, n-alkanols, sterols, PAHs and caffeine.	The organic fraction load on sands associable to natural sources was higher in the Region of Biskra than in that of Ouargla					JAHA
Algeria & Oasis	Balducci et al (2014)	Catia Balducci , Riad Ladji, Valeria Muto, Paola Romagnoli, Nourredine Yassaa, Angelo Cecinato	2014	Biogenic and anthropogenic organic components of Saharan sands	Chemosphere	107		129-135	10.1016/j.chemosphere.2014.02.069	Oumache	34.697485	5.684989	Algeria	human impact	Till now, the Sahara desert sands have scarcely characterized for their organic contents, despite they are known to heavily affect Europe and America when transported by winds.	the composition of sands collected in ten oasis lying in two regions of the Algerian Sahara during 2011 was investigated with regards to organic fraction. Attention was paid to anthropogenic and biogenic sources of organics associated to sands, through the characterization of n-alkanes, n-alkanoic and n-alkanedioic acids, n-alkanols, sterols, PAHs and caffeine.	The organic fraction load on sands associable to natural sources was higher in the Region of Biskra than in that of Ouargla					JAHA
Algeria & Oasis	Balducci et al (2014)	Catia Balducci , Riad Ladji, Valeria Muto, Paola Romagnoli, Nourredine Yassaa, Angelo Cecinato	2014	Biogenic and anthropogenic organic components of Saharan sands	Chemosphere	107		129-135	10.1016/j.chemosphere.2014.02.069	Hassi Messaoud	31.827407	5.885115	Algeria	human impact	Till now, the Sahara desert sands have scarcely characterized for their organic contents, despite they are known to heavily affect Europe and America when transported by winds.	the composition of sands collected in ten oasis lying in two regions of the Algerian Sahara during 2011 was investigated with regards to organic fraction. Attention was paid to anthropogenic and biogenic sources of organics associated to sands, through the characterization of n-alkanes, n-alkanoic and n-alkanedioic acids, n-alkanols, sterols, PAHs and caffeine.	The organic fraction load on sands associable to natural sources was higher in the Region of Biskra than in that of Ouargla					JAHA
Algeria & Oasis	Balducci et al (2014)	Catia Balducci , Riad Ladji, Valeria Muto, Paola Romagnoli, Nourredine Yassaa, Angelo Cecinato	2014	Biogenic and anthropogenic organic components of Saharan sands	Chemosphere	107		129-135	10.1016/j.chemosphere.2014.02.069	Hassi Ben Abdallah	32.030070	5.464962	Algeria	human impact	Till now, the Sahara desert sands have scarcely characterized for their organic contents, despite they are known to heavily affect Europe and America when transported by winds.	the composition of sands collected in ten oasis lying in two regions of the Algerian Sahara during 2011 was investigated with regards to organic fraction. Attention was paid to anthropogenic and biogenic sources of organics associated to sands, through the characterization of n-alkanes, n-alkanoic and n-alkanedioic acids, n-alkanols, sterols, PAHs and caffeine.	The organic fraction load on sands associable to natural sources was higher in the Region of Biskra than in that of Ouargla					JAHA
Algeria & Oasis	Balducci et al (2014)	Catia Balducci , Riad Ladji, Valeria Muto, Paola Romagnoli, Nourredine Yassaa, Angelo Cecinato	2014	Biogenic and anthropogenic organic components of Saharan sands	Chemosphere	107		129-135	10.1016/j.chemosphere.2014.02.069	Rouissat	31.944569	5.365890	Algeria	human impact	Till now, the Sahara desert sands have scarcely characterized for their organic contents, despite they are known to heavily affect Europe and America when transported by winds.	the composition of sands collected in ten oasis lying in two regions of the Algerian Sahara during 2011 was investigated with regards to organic fraction. Attention was paid to anthropogenic and biogenic sources of organics associated to sands, through the characterization of n-alkanes, n-alkanoic and n-alkanedioic acids, n-alkanols, sterols, PAHs and caffeine.	The organic fraction load on sands associable to natural sources was higher in the Region of Biskra than in that of Ouargla					JAHA
Algeria & Oasis	Balducci et al (2014)	Catia Balducci , Riad Ladji, Valeria Muto, Paola Romagnoli, Nourredine Yassaa, Angelo Cecinato	2014	Biogenic and anthropogenic organic components of Saharan sands	Chemosphere	107		129-135	10.1016/j.chemosphere.2014.02.069	Sidi Khouiled	31.976814	5.412719	Algeria	human impact	Till now, the Sahara desert sands have scarcely characterized for their organic contents, despite they are known to heavily affect Europe and America when transported by winds.	the composition of sands collected in ten oasis lying in two regions of the Algerian Sahara during 2011 was investigated with regards to organic fraction. Attention was paid to anthropogenic and biogenic sources of organics associated to sands, through the characterization of n-alkanes, n-alkanoic and n-alkanedioic acids, n-alkanols, sterols, PAHs and caffeine.	The organic fraction load on sands associable to natural sources was higher in the Region of Biskra than in that of Ouargla					JAHA
Algeria & Oasis	Bebniussa et al (2020)	Youcef Benmoussa, Boualem Remini, Mohamed Remaoun	2020	Quality assessment and hydrogeochemical characteristics of groundwater in Kerzaz and Beni Abbes along Saoura valley southwest of Algeria	Applied Water Science	10		170	doi.org/10.1007/s13201-020-01256-6	Beni-abbes	30.124229	-2.171951	Algeria	Hidrology	focused on the hydrochemistry of groundwater in Kerzaz and Beni Abbes in Saoura oases (southwest of Algeria) to assess the quality of groundwater for determining its suitability for drinking and irrigation purposes	drought. Groundwater samples were collected from 24 locations to ensure a good spatial distribution to cover all the study areas. Standards laboratory methods were used to determine physicochemical groundwater properties.	The result for this study showed that the water was to be found unsuitable for drinking purposes except for few samples in Kerzaz and Beni Abbes					JAHA
Algeria & Oasis	Bebniussa et al (2020)	Youcef Benmoussa, Boualem Remini, Mohamed Remaoun	2020	Quality assessment and hydrogeochemical characteristics of groundwater in Kerzaz and Beni Abbes along Saoura valley southwest of Algeria	Applied Water Science	10		170	doi.org/10.1007/s13201-020-01256-6	Saoura	29.456133	-1.428377	Algeria	Hidrology	focused on the hydrochemistry of groundwater in Kerzaz and Beni Abbes in Saoura oases (southwest of Algeria) to assess the quality of groundwater for determining its suitability for drinking and irrigation purposes	drought. Groundwater samples were collected from 24 locations to ensure a good spatial distribution to cover all the study areas. Standards laboratory methods were used to determine physicochemical groundwater properties.	The result for this study showed that the water was to be found unsuitable for drinking purposes except for few samples in Kerzaz and Beni Abbes					JAHA
Algeria & Oasis	Bekaddour et al (2015)	Akkacha Bekaddour , Abdelhafid Bessaid , Fethi Tarek Bendimerad	2015	Multi Spectral Satellite Image Ensembles Classification Combining k-means, LVQ and SVM Classification Techniques	Journal of Indian Society of Remote Sensing	43	4	671-686	10.1007/s12524-014-0445-x	Ouargla oasis	31.966667	5.333333	Algeria	Remote sensing	to combine three different kinds of classification methods; the unsupervised k-means technique to get an initial view of the image site that will helps us to choose the best training area for SVM classification system which is the second kind	In this paper, we used and combined three popular classification techniques using majority vote method. First will be the unsupervised segmentation technique k-means that we follow by SVM (support vector machine) regularization. The last technique will be the supervised neuronal technique LVQ (linear vector quantization).	The last kind is the neuronal supervised LVQ technique. Finally, we used in this specific work a LANDSAT image of a well known south Algerian region which is the Ouargla oasis acquired on December, 20 in 2000.					JAHA
Algeria & Oasis	Belalia et al (2019)	Nawel Belalia, Antonio Lupini, Abderrahmane Djemel, Abdelkader Morsli, Antonio Mauceri, Concetta Lotti, Majda Khelifi-Slaoui, Lakhdar Khelifi, Francesco Sunseri	2019	Analysis of genetic diversity and population structure in Saharan maize (Zea mays L.) populations using phenotypic traits and SSR markers	Genetic Resources and Crop Evolution	66		243-257	10.1007/s10722-018-0709-3	Adrar	27.863963	-0.302499	Algeria	Genetics	maize landraces from Sahara could be considered as valuable genetic resources for breeding.	Morphological and Molecular characterization of fifty-six populations were assessed using 14 agro-morphological traits and 18 SSR markers. Populations were evaluated in field experiment in an augmented randomized complete block design.	ANOVA on morphological data revealed significant difference among populations. Analysis of principal component showed two principal components describing 55.44% of total variation. Flowering time, plant height, ears traits and yield were the most discriminatory traits. Genetic analysis identified a large number of alleles (191) with mean value of 10.61 alleles per locus.					JAHA
Algeria & Oasis	Belalia et al (2019)	Nawel Belalia, Antonio Lupini, Abderrahmane Djemel, Abdelkader Morsli, Antonio Mauceri, Concetta Lotti, Majda Khelifi-Slaoui, Lakhdar Khelifi, Francesco Sunseri	2019	Analysis of genetic diversity and population structure in Saharan maize (Zea mays L.) populations using phenotypic traits and SSR markers	Genetic Resources and Crop Evolution	66		243-257	10.1007/s10722-018-0709-3	Tamanrasset	22.782985	5.531405	Algeria	Genetics	maize landraces from Sahara could be considered as valuable genetic resources for breeding.	Morphological and Molecular characterization of fifty-six populations were assessed using 14 agro-morphological traits and 18 SSR markers. Populations were evaluated in field experiment in an augmented randomized complete block design.	ANOVA on morphological data revealed significant difference among populations. Analysis of principal component showed two principal components describing 55.44% of total variation. Flowering time, plant height, ears traits and yield were the most discriminatory traits. Genetic analysis identified a large number of alleles (191) with mean value of 10.61 alleles per locus.					JAHA
Algeria & Oasis	Bellil et al. (2012)	Ines BELLIL, Mohammed CHEKARA BOUZIANI, Douadi KHELIFI	2012	Genetic Diversity of High and Low Molecular Weight Glutenin Subunits in Saharan Bread and Durum Wheats from Algerian Oases	Czech Journal of Genetics and Plant Breeding	48		23-32	10.17221/105/2011-CJGPB	Djanet	24.551545	9.478405	Algeria	Genetics	Genotypic identification, classification and genetic diversity studies to date were essentially based on the morphology of the spike and grain.	the allelic variation at the glutenin loci was studied in a set of Saharan bread and durum wheats from Algerian oases where this crop has been traditionally cultivated.	The high molecular weight and low molecular weight glutenin subunit composition of 40 Saharan bread and 30 durum wheats was determined by SDS-PAGE. In Saharan bread wheats 32 alleles at the six glutenin loci were detected, which in combination resulted in 36 different patterns including 17 for HMW and 23 for LMW glutenin subunits. For the Saharan durum wheats, 29 different alleles were identified…					JAHA
Algeria & Oasis	Bellil et al. (2012)	Ines BELLIL, Mohammed CHEKARA BOUZIANI, Douadi KHELIFI	2012	Genetic Diversity of High and Low Molecular Weight Glutenin Subunits in Saharan Bread and Durum Wheats from Algerian Oases	Czech Journal of Genetics and Plant Breeding	48		23-32	10.17221/105/2011-CJGPB	Ourlaga	31.949090	5.300479	Algeria	Genetics	Genotypic identification, classification and genetic diversity studies to date were essentially based on the morphology of the spike and grain.	the allelic variation at the glutenin loci was studied in a set of Saharan bread and durum wheats from Algerian oases where this crop has been traditionally cultivated.	The high molecular weight and low molecular weight glutenin subunit composition of 40 Saharan bread and 30 durum wheats was determined by SDS-PAGE. In Saharan bread wheats 32 alleles at the six glutenin loci were detected, which in combination resulted in 36 different patterns including 17 for HMW and 23 for LMW glutenin subunits. For the Saharan durum wheats, 29 different alleles were identified…					JAHA
Algeria & Oasis	Bellil et al. (2012)	Ines BELLIL, Mohammed CHEKARA BOUZIANI, Douadi KHELIFI	2012	Genetic Diversity of High and Low Molecular Weight Glutenin Subunits in Saharan Bread and Durum Wheats from Algerian Oases	Czech Journal of Genetics and Plant Breeding	48		23-32	10.17221/105/2011-CJGPB	Timimoun	29.265622	0.222565	Algeria	Genetics	Genotypic identification, classification and genetic diversity studies to date were essentially based on the morphology of the spike and grain.	the allelic variation at the glutenin loci was studied in a set of Saharan bread and durum wheats from Algerian oases where this crop has been traditionally cultivated.	The high molecular weight and low molecular weight glutenin subunit composition of 40 Saharan bread and 30 durum wheats was determined by SDS-PAGE. In Saharan bread wheats 32 alleles at the six glutenin loci were detected, which in combination resulted in 36 different patterns including 17 for HMW and 23 for LMW glutenin subunits. For the Saharan durum wheats, 29 different alleles were identified…					JAHA
Algeria & Oasis	Bellil et al. (2012)	Ines BELLIL, Mohammed CHEKARA BOUZIANI, Douadi KHELIFI	2012	Genetic Diversity of High and Low Molecular Weight Glutenin Subunits in Saharan Bread and Durum Wheats from Algerian Oases	Czech Journal of Genetics and Plant Breeding	48		23-32	10.17221/105/2011-CJGPB	Touat	27.328961	-0.220714	Algeria	Genetics	Genotypic identification, classification and genetic diversity studies to date were essentially based on the morphology of the spike and grain.	the allelic variation at the glutenin loci was studied in a set of Saharan bread and durum wheats from Algerian oases where this crop has been traditionally cultivated.	The high molecular weight and low molecular weight glutenin subunit composition of 40 Saharan bread and 30 durum wheats was determined by SDS-PAGE. In Saharan bread wheats 32 alleles at the six glutenin loci were detected, which in combination resulted in 36 different patterns including 17 for HMW and 23 for LMW glutenin subunits. For the Saharan durum wheats, 29 different alleles were identified…					JAHA
Algeria & Oasis	Bellil et al. (2012)	Ines BELLIL, Mohammed CHEKARA BOUZIANI, Douadi KHELIFI	2012	Genetic Diversity of High and Low Molecular Weight Glutenin Subunits in Saharan Bread and Durum Wheats from Algerian Oases	Czech Journal of Genetics and Plant Breeding	48		23-32	10.17221/105/2011-CJGPB	Adrar	27.863963	-0.302499	Algeria	Genetics	Genotypic identification, classification and genetic diversity studies to date were essentially based on the morphology of the spike and grain.	the allelic variation at the glutenin loci was studied in a set of Saharan bread and durum wheats from Algerian oases where this crop has been traditionally cultivated.	The high molecular weight and low molecular weight glutenin subunit composition of 40 Saharan bread and 30 durum wheats was determined by SDS-PAGE. In Saharan bread wheats 32 alleles at the six glutenin loci were detected, which in combination resulted in 36 different patterns including 17 for HMW and 23 for LMW glutenin subunits. For the Saharan durum wheats, 29 different alleles were identified…					JAHA
Algeria & Oasis	Bellil et al. (2012)	Ines BELLIL, Mohammed CHEKARA BOUZIANI, Douadi KHELIFI	2012	Genetic Diversity of High and Low Molecular Weight Glutenin Subunits in Saharan Bread and Durum Wheats from Algerian Oases	Czech Journal of Genetics and Plant Breeding	48		23-32	10.17221/105/2011-CJGPB	Tsabit	28.349650	-0.227575	Algeria	Genetics	Genotypic identification, classification and genetic diversity studies to date were essentially based on the morphology of the spike and grain.	the allelic variation at the glutenin loci was studied in a set of Saharan bread and durum wheats from Algerian oases where this crop has been traditionally cultivated.	The high molecular weight and low molecular weight glutenin subunit composition of 40 Saharan bread and 30 durum wheats was determined by SDS-PAGE. In Saharan bread wheats 32 alleles at the six glutenin loci were detected, which in combination resulted in 36 different patterns including 17 for HMW and 23 for LMW glutenin subunits. For the Saharan durum wheats, 29 different alleles were identified…					JAHA
Algeria & Oasis	Bellil et al. (2012)	Ines BELLIL, Mohammed CHEKARA BOUZIANI, Douadi KHELIFI	2012	Genetic Diversity of High and Low Molecular Weight Glutenin Subunits in Saharan Bread and Durum Wheats from Algerian Oases	Czech Journal of Genetics and Plant Breeding	48		23-32	10.17221/105/2011-CJGPB	Biskra oasis	34.833333	5.750000	Algeria	Genetics	Genotypic identification, classification and genetic diversity studies to date were essentially based on the morphology of the spike and grain.	the allelic variation at the glutenin loci was studied in a set of Saharan bread and durum wheats from Algerian oases where this crop has been traditionally cultivated.	The high molecular weight and low molecular weight glutenin subunit composition of 40 Saharan bread and 30 durum wheats was determined by SDS-PAGE. In Saharan bread wheats 32 alleles at the six glutenin loci were detected, which in combination resulted in 36 different patterns including 17 for HMW and 23 for LMW glutenin subunits. For the Saharan durum wheats, 29 different alleles were identified…					JAHA
Algeria & Oasis	Bellil et al. (2012)	Ines BELLIL, Mohammed CHEKARA BOUZIANI, Douadi KHELIFI	2012	Genetic Diversity of High and Low Molecular Weight Glutenin Subunits in Saharan Bread and Durum Wheats from Algerian Oases	Czech Journal of Genetics and Plant Breeding	48		23-32	10.17221/105/2011-CJGPB	Gourara	29.262031	0.218904	Algeria	Genetics	Genotypic identification, classification and genetic diversity studies to date were essentially based on the morphology of the spike and grain.	the allelic variation at the glutenin loci was studied in a set of Saharan bread and durum wheats from Algerian oases where this crop has been traditionally cultivated.	The high molecular weight and low molecular weight glutenin subunit composition of 40 Saharan bread and 30 durum wheats was determined by SDS-PAGE. In Saharan bread wheats 32 alleles at the six glutenin loci were detected, which in combination resulted in 36 different patterns including 17 for HMW and 23 for LMW glutenin subunits. For the Saharan durum wheats, 29 different alleles were identified…					JAHA
Algeria & Oasis	Bellil et al. (2012)	Ines BELLIL, Mohammed CHEKARA BOUZIANI, Douadi KHELIFI	2012	Genetic Diversity of High and Low Molecular Weight Glutenin Subunits in Saharan Bread and Durum Wheats from Algerian Oases	Czech Journal of Genetics and Plant Breeding	48		23-32	10.17221/105/2011-CJGPB	Ouled El Hadj Mamoun	27.750580	-0.232061	Algeria	Genetics	Genotypic identification, classification and genetic diversity studies to date were essentially based on the morphology of the spike and grain.	the allelic variation at the glutenin loci was studied in a set of Saharan bread and durum wheats from Algerian oases where this crop has been traditionally cultivated.	The high molecular weight and low molecular weight glutenin subunit composition of 40 Saharan bread and 30 durum wheats was determined by SDS-PAGE. In Saharan bread wheats 32 alleles at the six glutenin loci were detected, which in combination resulted in 36 different patterns including 17 for HMW and 23 for LMW glutenin subunits. For the Saharan durum wheats, 29 different alleles were identified…					JAHA
Algeria & Oasis	Bellil et al. (2012)	Ines BELLIL, Mohammed CHEKARA BOUZIANI, Douadi KHELIFI	2012	Genetic Diversity of High and Low Molecular Weight Glutenin Subunits in Saharan Bread and Durum Wheats from Algerian Oases	Czech Journal of Genetics and Plant Breeding	48		23-32	10.17221/105/2011-CJGPB	Aougrout	28.696230	0.336980	Algeria	Genetics	Genotypic identification, classification and genetic diversity studies to date were essentially based on the morphology of the spike and grain.	the allelic variation at the glutenin loci was studied in a set of Saharan bread and durum wheats from Algerian oases where this crop has been traditionally cultivated.	The high molecular weight and low molecular weight glutenin subunit composition of 40 Saharan bread and 30 durum wheats was determined by SDS-PAGE. In Saharan bread wheats 32 alleles at the six glutenin loci were detected, which in combination resulted in 36 different patterns including 17 for HMW and 23 for LMW glutenin subunits. For the Saharan durum wheats, 29 different alleles were identified…					JAHA
Algeria & Oasis	Bellil et al. (2012)	Ines BELLIL, Mohammed CHEKARA BOUZIANI, Douadi KHELIFI	2012	Genetic Diversity of High and Low Molecular Weight Glutenin Subunits in Saharan Bread and Durum Wheats from Algerian Oases	Czech Journal of Genetics and Plant Breeding	48		23-32	10.17221/105/2011-CJGPB	Zaouiet Kounta	27.304497	-0.227690	Algeria	Genetics	Genotypic identification, classification and genetic diversity studies to date were essentially based on the morphology of the spike and grain.	the allelic variation at the glutenin loci was studied in a set of Saharan bread and durum wheats from Algerian oases where this crop has been traditionally cultivated.	The high molecular weight and low molecular weight glutenin subunit composition of 40 Saharan bread and 30 durum wheats was determined by SDS-PAGE. In Saharan bread wheats 32 alleles at the six glutenin loci were detected, which in combination resulted in 36 different patterns including 17 for HMW and 23 for LMW glutenin subunits. For the Saharan durum wheats, 29 different alleles were identified…					JAHA
Algeria & Oasis	Bellil et al. (2012)	Ines BELLIL, Mohammed CHEKARA BOUZIANI, Douadi KHELIFI	2012	Genetic Diversity of High and Low Molecular Weight Glutenin Subunits in Saharan Bread and Durum Wheats from Algerian Oases	Czech Journal of Genetics and Plant Breeding	48		23-32	10.17221/105/2011-CJGPB	Ouled Rached	29.432546	0.284532	Algeria	Genetics	Genotypic identification, classification and genetic diversity studies to date were essentially based on the morphology of the spike and grain.	the allelic variation at the glutenin loci was studied in a set of Saharan bread and durum wheats from Algerian oases where this crop has been traditionally cultivated.	The high molecular weight and low molecular weight glutenin subunit composition of 40 Saharan bread and 30 durum wheats was determined by SDS-PAGE. In Saharan bread wheats 32 alleles at the six glutenin loci were detected, which in combination resulted in 36 different patterns including 17 for HMW and 23 for LMW glutenin subunits. For the Saharan durum wheats, 29 different alleles were identified…					JAHA
Algeria & Oasis	Bellil et al. (2012)	Ines BELLIL, Mohammed CHEKARA BOUZIANI, Douadi KHELIFI	2012	Genetic Diversity of High and Low Molecular Weight Glutenin Subunits in Saharan Bread and Durum Wheats from Algerian Oases	Czech Journal of Genetics and Plant Breeding	48		23-32	10.17221/105/2011-CJGPB	Hassi Ben Abdallah	32.030070	5.464962	Algeria	Genetics	Genotypic identification, classification and genetic diversity studies to date were essentially based on the morphology of the spike and grain.	the allelic variation at the glutenin loci was studied in a set of Saharan bread and durum wheats from Algerian oases where this crop has been traditionally cultivated.	The high molecular weight and low molecular weight glutenin subunit composition of 40 Saharan bread and 30 durum wheats was determined by SDS-PAGE. In Saharan bread wheats 32 alleles at the six glutenin loci were detected, which in combination resulted in 36 different patterns including 17 for HMW and 23 for LMW glutenin subunits. For the Saharan durum wheats, 29 different alleles were identified…					JAHA
Algeria & Oasis	Bellil et al. (2012)	Ines BELLIL, Mohammed CHEKARA BOUZIANI, Douadi KHELIFI	2012	Genetic Diversity of High and Low Molecular Weight Glutenin Subunits in Saharan Bread and Durum Wheats from Algerian Oases	Czech Journal of Genetics and Plant Breeding	48		23-32	10.17221/105/2011-CJGPB	Aoulef	26.964488	1.071565	Algeria	Genetics	Genotypic identification, classification and genetic diversity studies to date were essentially based on the morphology of the spike and grain.	the allelic variation at the glutenin loci was studied in a set of Saharan bread and durum wheats from Algerian oases where this crop has been traditionally cultivated.	The high molecular weight and low molecular weight glutenin subunit composition of 40 Saharan bread and 30 durum wheats was determined by SDS-PAGE. In Saharan bread wheats 32 alleles at the six glutenin loci were detected, which in combination resulted in 36 different patterns including 17 for HMW and 23 for LMW glutenin subunits. For the Saharan durum wheats, 29 different alleles were identified…					JAHA
Algeria & Oasis	Bellil et al. (2012)	Ines BELLIL, Mohammed CHEKARA BOUZIANI, Douadi KHELIFI	2012	Genetic Diversity of High and Low Molecular Weight Glutenin Subunits in Saharan Bread and Durum Wheats from Algerian Oases	Czech Journal of Genetics and Plant Breeding	48		23-32	10.17221/105/2011-CJGPB	El Ksar Ain Zeghlouf-Reggane	26.716144	0.164682	Algeria	Genetics	Genotypic identification, classification and genetic diversity studies to date were essentially based on the morphology of the spike and grain.	the allelic variation at the glutenin loci was studied in a set of Saharan bread and durum wheats from Algerian oases where this crop has been traditionally cultivated.	The high molecular weight and low molecular weight glutenin subunit composition of 40 Saharan bread and 30 durum wheats was determined by SDS-PAGE. In Saharan bread wheats 32 alleles at the six glutenin loci were detected, which in combination resulted in 36 different patterns including 17 for HMW and 23 for LMW glutenin subunits. For the Saharan durum wheats, 29 different alleles were identified…					JAHA
Algeria & Oasis	Bellil et al. (2012)	Ines BELLIL, Mohammed CHEKARA BOUZIANI, Douadi KHELIFI	2012	Genetic Diversity of High and Low Molecular Weight Glutenin Subunits in Saharan Bread and Durum Wheats from Algerian Oases	Czech Journal of Genetics and Plant Breeding	48		23-32	10.17221/105/2011-CJGPB	M'ziraa	34.719328	6.282167	Algeria	Genetics	Genotypic identification, classification and genetic diversity studies to date were essentially based on the morphology of the spike and grain.	the allelic variation at the glutenin loci was studied in a set of Saharan bread and durum wheats from Algerian oases where this crop has been traditionally cultivated.	The high molecular weight and low molecular weight glutenin subunit composition of 40 Saharan bread and 30 durum wheats was determined by SDS-PAGE. In Saharan bread wheats 32 alleles at the six glutenin loci were detected, which in combination resulted in 36 different patterns including 17 for HMW and 23 for LMW glutenin subunits. For the Saharan durum wheats, 29 different alleles were identified…					JAHA
Algeria & Oasis	Bellil et al. (2012)	Ines BELLIL, Mohammed CHEKARA BOUZIANI, Douadi KHELIFI	2012	Genetic Diversity of High and Low Molecular Weight Glutenin Subunits in Saharan Bread and Durum Wheats from Algerian Oases	Czech Journal of Genetics and Plant Breeding	48		23-32	10.17221/105/2011-CJGPB	Chegga	34.446942	5.888840	Algeria	Genetics	Genotypic identification, classification and genetic diversity studies to date were essentially based on the morphology of the spike and grain.	the allelic variation at the glutenin loci was studied in a set of Saharan bread and durum wheats from Algerian oases where this crop has been traditionally cultivated.	The high molecular weight and low molecular weight glutenin subunit composition of 40 Saharan bread and 30 durum wheats was determined by SDS-PAGE. In Saharan bread wheats 32 alleles at the six glutenin loci were detected, which in combination resulted in 36 different patterns including 17 for HMW and 23 for LMW glutenin subunits. For the Saharan durum wheats, 29 different alleles were identified…					JAHA
Algeria & Oasis	Bellil et al. (2012)	Ines BELLIL, Mohammed CHEKARA BOUZIANI, Douadi KHELIFI	2012	Genetic Diversity of High and Low Molecular Weight Glutenin Subunits in Saharan Bread and Durum Wheats from Algerian Oases	Czech Journal of Genetics and Plant Breeding	48		23-32	10.17221/105/2011-CJGPB	Bechar	31.663373	-2.170670	Algeria	Genetics	Genotypic identification, classification and genetic diversity studies to date were essentially based on the morphology of the spike and grain.	the allelic variation at the glutenin loci was studied in a set of Saharan bread and durum wheats from Algerian oases where this crop has been traditionally cultivated.	The high molecular weight and low molecular weight glutenin subunit composition of 40 Saharan bread and 30 durum wheats was determined by SDS-PAGE. In Saharan bread wheats 32 alleles at the six glutenin loci were detected, which in combination resulted in 36 different patterns including 17 for HMW and 23 for LMW glutenin subunits. For the Saharan durum wheats, 29 different alleles were identified…					JAHA
Algeria & Oasis	Bellil et al. (2012)	Ines BELLIL, Mohammed CHEKARA BOUZIANI, Douadi KHELIFI	2012	Genetic Diversity of High and Low Molecular Weight Glutenin Subunits in Saharan Bread and Durum Wheats from Algerian Oases	Czech Journal of Genetics and Plant Breeding	48		23-32	10.17221/105/2011-CJGPB	Lioua	34.621319	5.399489	Algeria	Genetics	Genotypic identification, classification and genetic diversity studies to date were essentially based on the morphology of the spike and grain.	the allelic variation at the glutenin loci was studied in a set of Saharan bread and durum wheats from Algerian oases where this crop has been traditionally cultivated.	The high molecular weight and low molecular weight glutenin subunit composition of 40 Saharan bread and 30 durum wheats was determined by SDS-PAGE. In Saharan bread wheats 32 alleles at the six glutenin loci were detected, which in combination resulted in 36 different patterns including 17 for HMW and 23 for LMW glutenin subunits. For the Saharan durum wheats, 29 different alleles were identified…					JAHA
Algeria & Oasis	Bellil et al. (2012)	Ines BELLIL, Mohammed CHEKARA BOUZIANI, Douadi KHELIFI	2012	Genetic Diversity of High and Low Molecular Weight Glutenin Subunits in Saharan Bread and Durum Wheats from Algerian Oases	Czech Journal of Genetics and Plant Breeding	48		23-32	10.17221/105/2011-CJGPB	Mekkid	34.088840	3.313127	Algeria	Genetics	Genotypic identification, classification and genetic diversity studies to date were essentially based on the morphology of the spike and grain.	the allelic variation at the glutenin loci was studied in a set of Saharan bread and durum wheats from Algerian oases where this crop has been traditionally cultivated.	The high molecular weight and low molecular weight glutenin subunit composition of 40 Saharan bread and 30 durum wheats was determined by SDS-PAGE. In Saharan bread wheats 32 alleles at the six glutenin loci were detected, which in combination resulted in 36 different patterns including 17 for HMW and 23 for LMW glutenin subunits. For the Saharan durum wheats, 29 different alleles were identified…					JAHA
Algeria & Oasis	Bellil et al. (2012)	Ines BELLIL, Mohammed CHEKARA BOUZIANI, Douadi KHELIFI	2012	Genetic Diversity of High and Low Molecular Weight Glutenin Subunits in Saharan Bread and Durum Wheats from Algerian Oases	Czech Journal of Genetics and Plant Breeding	48		23-32	10.17221/105/2011-CJGPB	Megarine	33.199816	6.088580	Algeria	Genetics	Genotypic identification, classification and genetic diversity studies to date were essentially based on the morphology of the spike and grain.	the allelic variation at the glutenin loci was studied in a set of Saharan bread and durum wheats from Algerian oases where this crop has been traditionally cultivated.	The high molecular weight and low molecular weight glutenin subunit composition of 40 Saharan bread and 30 durum wheats was determined by SDS-PAGE. In Saharan bread wheats 32 alleles at the six glutenin loci were detected, which in combination resulted in 36 different patterns including 17 for HMW and 23 for LMW glutenin subunits. For the Saharan durum wheats, 29 different alleles were identified…					JAHA
Algeria & Oasis	Bellil et al. (2012)	Ines BELLIL, Mohammed CHEKARA BOUZIANI, Douadi KHELIFI	2012	Genetic Diversity of High and Low Molecular Weight Glutenin Subunits in Saharan Bread and Durum Wheats from Algerian Oases	Czech Journal of Genetics and Plant Breeding	48		23-32	10.17221/105/2011-CJGPB	Djamaa	33.558409	6.002825	Algeria	Genetics	Genotypic identification, classification and genetic diversity studies to date were essentially based on the morphology of the spike and grain.	the allelic variation at the glutenin loci was studied in a set of Saharan bread and durum wheats from Algerian oases where this crop has been traditionally cultivated.	The high molecular weight and low molecular weight glutenin subunit composition of 40 Saharan bread and 30 durum wheats was determined by SDS-PAGE. In Saharan bread wheats 32 alleles at the six glutenin loci were detected, which in combination resulted in 36 different patterns including 17 for HMW and 23 for LMW glutenin subunits. For the Saharan durum wheats, 29 different alleles were identified…					JAHA
Algeria & Oasis	Bellil et al. (2012)	Ines BELLIL, Mohammed CHEKARA BOUZIANI, Douadi KHELIFI	2012	Genetic Diversity of High and Low Molecular Weight Glutenin Subunits in Saharan Bread and Durum Wheats from Algerian Oases	Czech Journal of Genetics and Plant Breeding	48		23-32	10.17221/105/2011-CJGPB	Doucen	34.617838	5.097116	Algeria	Genetics	Genotypic identification, classification and genetic diversity studies to date were essentially based on the morphology of the spike and grain.	the allelic variation at the glutenin loci was studied in a set of Saharan bread and durum wheats from Algerian oases where this crop has been traditionally cultivated.	The high molecular weight and low molecular weight glutenin subunit composition of 40 Saharan bread and 30 durum wheats was determined by SDS-PAGE. In Saharan bread wheats 32 alleles at the six glutenin loci were detected, which in combination resulted in 36 different patterns including 17 for HMW and 23 for LMW glutenin subunits. For the Saharan durum wheats, 29 different alleles were identified…					JAHA
Algeria & Oasis	Bellil et al. (2012)	Ines BELLIL, Mohammed CHEKARA BOUZIANI, Douadi KHELIFI	2012	Genetic Diversity of High and Low Molecular Weight Glutenin Subunits in Saharan Bread and Durum Wheats from Algerian Oases	Czech Journal of Genetics and Plant Breeding	48		23-32	10.17221/105/2011-CJGPB	Sidi Okba	34.756215	5.891405	Algeria	Genetics	Genotypic identification, classification and genetic diversity studies to date were essentially based on the morphology of the spike and grain.	the allelic variation at the glutenin loci was studied in a set of Saharan bread and durum wheats from Algerian oases where this crop has been traditionally cultivated.	The high molecular weight and low molecular weight glutenin subunit composition of 40 Saharan bread and 30 durum wheats was determined by SDS-PAGE. In Saharan bread wheats 32 alleles at the six glutenin loci were detected, which in combination resulted in 36 different patterns including 17 for HMW and 23 for LMW glutenin subunits. For the Saharan durum wheats, 29 different alleles were identified…					JAHA
Algeria & Oasis	Bellil et al. (2012)	Ines BELLIL, Mohammed CHEKARA BOUZIANI, Douadi KHELIFI	2012	Genetic Diversity of High and Low Molecular Weight Glutenin Subunits in Saharan Bread and Durum Wheats from Algerian Oases	Czech Journal of Genetics and Plant Breeding	48		23-32	10.17221/105/2011-CJGPB	Khangat Sidi Naji	34.817028	6.703979	Algeria	Genetics	Genotypic identification, classification and genetic diversity studies to date were essentially based on the morphology of the spike and grain.	the allelic variation at the glutenin loci was studied in a set of Saharan bread and durum wheats from Algerian oases where this crop has been traditionally cultivated.	The high molecular weight and low molecular weight glutenin subunit composition of 40 Saharan bread and 30 durum wheats was determined by SDS-PAGE. In Saharan bread wheats 32 alleles at the six glutenin loci were detected, which in combination resulted in 36 different patterns including 17 for HMW and 23 for LMW glutenin subunits. For the Saharan durum wheats, 29 different alleles were identified…					JAHA
Algeria & Oasis	Bellil et al. (2012)	Ines BELLIL, Mohammed CHEKARA BOUZIANI, Douadi KHELIFI	2012	Genetic Diversity of High and Low Molecular Weight Glutenin Subunits in Saharan Bread and Durum Wheats from Algerian Oases	Czech Journal of Genetics and Plant Breeding	48		23-32	10.17221/105/2011-CJGPB	Zribet El Oued	34.663335	6.513284	Algeria	Genetics	Genotypic identification, classification and genetic diversity studies to date were essentially based on the morphology of the spike and grain.	the allelic variation at the glutenin loci was studied in a set of Saharan bread and durum wheats from Algerian oases where this crop has been traditionally cultivated.	The high molecular weight and low molecular weight glutenin subunit composition of 40 Saharan bread and 30 durum wheats was determined by SDS-PAGE. In Saharan bread wheats 32 alleles at the six glutenin loci were detected, which in combination resulted in 36 different patterns including 17 for HMW and 23 for LMW glutenin subunits. For the Saharan durum wheats, 29 different alleles were identified…					JAHA
Algeria & Oasis	Bellil et al. (2012)	Ines BELLIL, Mohammed CHEKARA BOUZIANI, Douadi KHELIFI	2012	Genetic Diversity of High and Low Molecular Weight Glutenin Subunits in Saharan Bread and Durum Wheats from Algerian Oases	Czech Journal of Genetics and Plant Breeding	48		23-32	10.17221/105/2011-CJGPB	Ain Zaatout	35.153162	5.840109	Algeria	Genetics	Genotypic identification, classification and genetic diversity studies to date were essentially based on the morphology of the spike and grain.	the allelic variation at the glutenin loci was studied in a set of Saharan bread and durum wheats from Algerian oases where this crop has been traditionally cultivated.	The high molecular weight and low molecular weight glutenin subunit composition of 40 Saharan bread and 30 durum wheats was determined by SDS-PAGE. In Saharan bread wheats 32 alleles at the six glutenin loci were detected, which in combination resulted in 36 different patterns including 17 for HMW and 23 for LMW glutenin subunits. For the Saharan durum wheats, 29 different alleles were identified…					JAHA
Algeria & Oasis	Benbetka et al. (2018)	S. Benbetka, A. Hachid, K.E. Benallal, C. Benbetka, A. Khaldi, I. Bitam, Z. Harrat	2018	First field evidence infection of Culex perexiguus by West Nile virus in Sahara Oasis of Algeria	Journal of Vector Borne Diseases	55		305-309	10.4103/0972-9062.256566	Aougrout	28.699194	0.333262	Algeria	Parasitology	study the mosquito species involved in WNV transmission in Aougrout, one of the highly populated Oasis of Timimoun Province in Algeria where human WNV neuroinvasive diseases are prevalent.	CDC light-traps were installed in animal and human shelters for three nights. Collected mosquitoes were pooled and real-time PCR was performed to detect and identify WNV lineages 1 and 2 in the samples.	CDC light-traps collected 270 mosquitoes belonging to three genera. Culex genus was predominant with Cx. perexiguus as main species followed by Aedes and Anopheles genus. A total of 33 pools were tested; one pool containing Cx. perexiguus was found positive for WNV lineage 1.				Culex perexiguus,Aedes caspius,Culex. Pipiens,Anopheles d’thali,An. rhodesiensis rupicolus	JAHA
Algeria & Oasis	Benimhoub et al (2021)	Ahmed Benmihoub, Samia Akli, Nafissa Benabid	2021	Enjeux, pratiques et contraintes pour une mise en valeur agroécologique des terres au Sahara. Cas d’un périmètre péri-oasien dans la Vallée du M’Zab (Algérie)	New medit: Mediterranean journal of economics, agriculture and environment = Revue méditerranéenne d'economie, agriculture et environment,	20	2	76-96	10.30682/nm2102f	Beni Isguen	32.460125	3.678992	Algeria	Agronomy	This article analyzes the adoption of practices face to the ecological and social issues and the constraints perception to agroecological development in the M’Zab Valley	The socioecological approach shows	current agrosystem is “hybrid”, under the influence of the old oasis model, symbol of ecological balance, and of the conventional model, vector of both a dynamic of innovations and threats on agricultural sustainability					JAHA
Algeria & Oasis	Benzerroug et al (1991)	E. H. Benzerroug,l P. G. Janssens, P. Ambroise-Thomas	1991	Etude seroepidemiologique du paludisme au Sahara algerien	Bulletin de lOrganisation mondiale de la Santé	69	6	713-723		In Salah	27.196258	2.461980	Algeria	Parasitology	I'analyse des donnees historiques sur le paludisme dans la region saharienne montre que la situation 6pid6miologique semble etroitement liee aux conditions climatiques et hydrographiques.	Dans ce vaste contexte une 6tude seroepid6miologique longitudinale a 6t6 r6alis6e de septembre 1983 a avril 1985	Les r6sultats g6n6raux de cette etude ne paraissent pas en faveur de l'existence de foyers actifs de transmission, neanmoins l'analyse des donnees de certaines oasis et localit6s permettent une appr6ciation diff6rente de la situation Ipid6miologique.					JAHA
Algeria & Oasis	Benzerroug et al (1991)	E. H. Benzerroug,l P. G. Janssens, P. Ambroise-Thomas	1991	Etude seroepidemiologique du paludisme au Sahara algerien	Bulletin de lOrganisation mondiale de la Santé	69	6	713-723		Timimoun	29.265622	0.222565	Algeria	Parasitology	I'analyse des donnees historiques sur le paludisme dans la region saharienne montre que la situation 6pid6miologique semble etroitement liee aux conditions climatiques et hydrographiques.	Dans ce vaste contexte une 6tude seroepid6miologique longitudinale a 6t6 r6alis6e de septembre 1983 a avril 1985	Les r6sultats g6n6raux de cette etude ne paraissent pas en faveur de l'existence de foyers actifs de transmission, neanmoins l'analyse des donnees de certaines oasis et localit6s permettent une appr6ciation diff6rente de la situation Ipid6miologique.					JAHA
Algeria & Oasis	Benzerroug et al (1991)	E. H. Benzerroug,l P. G. Janssens, P. Ambroise-Thomas	1991	Etude seroepidemiologique du paludisme au Sahara algerien	Bulletin de lOrganisation mondiale de la Santé	69	6	713-723		Djanet	24.551545	9.478405	Algeria	Parasitology	I'analyse des donnees historiques sur le paludisme dans la region saharienne montre que la situation 6pid6miologique semble etroitement liee aux conditions climatiques et hydrographiques.	Dans ce vaste contexte une 6tude seroepid6miologique longitudinale a 6t6 r6alis6e de septembre 1983 a avril 1985	Les r6sultats g6n6raux de cette etude ne paraissent pas en faveur de l'existence de foyers actifs de transmission, neanmoins l'analyse des donnees de certaines oasis et localit6s permettent une appr6ciation diff6rente de la situation Ipid6miologique.					JAHA
Algeria & Oasis	Benzerroug et al (1991)	E. H. Benzerroug,l P. G. Janssens, P. Ambroise-Thomas	1991	Etude seroepidemiologique du paludisme au Sahara algerien	Bulletin de lOrganisation mondiale de la Santé	69	6	713-723		Ourlaga	31.949090	5.300479	Algeria	Parasitology	I'analyse des donnees historiques sur le paludisme dans la region saharienne montre que la situation 6pid6miologique semble etroitement liee aux conditions climatiques et hydrographiques.	Dans ce vaste contexte une 6tude seroepid6miologique longitudinale a 6t6 r6alis6e de septembre 1983 a avril 1985	Les r6sultats g6n6raux de cette etude ne paraissent pas en faveur de l'existence de foyers actifs de transmission, neanmoins l'analyse des donnees de certaines oasis et localit6s permettent une appr6ciation diff6rente de la situation Ipid6miologique.					JAHA
Algeria & Oasis	Benzerroug et al (1991)	E. H. Benzerroug,l P. G. Janssens, P. Ambroise-Thomas	1991	Etude seroepidemiologique du paludisme au Sahara algerien	Bulletin de lOrganisation mondiale de la Santé	69	6	713-723		Touat	27.328961	-0.220714	Algeria	Parasitology	I'analyse des donnees historiques sur le paludisme dans la region saharienne montre que la situation 6pid6miologique semble etroitement liee aux conditions climatiques et hydrographiques.	Dans ce vaste contexte une 6tude seroepid6miologique longitudinale a 6t6 r6alis6e de septembre 1983 a avril 1985	Les r6sultats g6n6raux de cette etude ne paraissent pas en faveur de l'existence de foyers actifs de transmission, neanmoins l'analyse des donnees de certaines oasis et localit6s permettent une appr6ciation diff6rente de la situation Ipid6miologique.					JAHA
Algeria & Oasis	Benzerroug et al (1991)	E. H. Benzerroug,l P. G. Janssens, P. Ambroise-Thomas	1991	Etude seroepidemiologique du paludisme au Sahara algerien	Bulletin de lOrganisation mondiale de la Santé	69	6	713-723		Heiha	29.533536	-0.021943	Algeria	Parasitology	I'analyse des donnees historiques sur le paludisme dans la region saharienne montre que la situation 6pid6miologique semble etroitement liee aux conditions climatiques et hydrographiques.	Dans ce vaste contexte une 6tude seroepid6miologique longitudinale a 6t6 r6alis6e de septembre 1983 a avril 1985	Les r6sultats g6n6raux de cette etude ne paraissent pas en faveur de l'existence de foyers actifs de transmission, neanmoins l'analyse des donnees de certaines oasis et localit6s permettent une appr6ciation diff6rente de la situation Ipid6miologique.					JAHA
Algeria & Oasis	Benzerroug et al (1991)	E. H. Benzerroug,l P. G. Janssens, P. Ambroise-Thomas	1991	Etude seroepidemiologique du paludisme au Sahara algerien	Bulletin de lOrganisation mondiale de la Santé	69	6	713-723		Tamanrasset	22.782985	5.531405	Algeria	Parasitology	I'analyse des donnees historiques sur le paludisme dans la region saharienne montre que la situation 6pid6miologique semble etroitement liee aux conditions climatiques et hydrographiques.	Dans ce vaste contexte une 6tude seroepid6miologique longitudinale a 6t6 r6alis6e de septembre 1983 a avril 1985	Les r6sultats g6n6raux de cette etude ne paraissent pas en faveur de l'existence de foyers actifs de transmission, neanmoins l'analyse des donnees de certaines oasis et localit6s permettent une appr6ciation diff6rente de la situation Ipid6miologique.					JAHA
Algeria & Oasis	Benzerroug et al (1991)	E. H. Benzerroug,l P. G. Janssens, P. Ambroise-Thomas	1991	Etude seroepidemiologique du paludisme au Sahara algerien	Bulletin de lOrganisation mondiale de la Santé	69	6	713-723		Iherir	25.402645	8.406069	Algeria	Parasitology	I'analyse des donnees historiques sur le paludisme dans la region saharienne montre que la situation 6pid6miologique semble etroitement liee aux conditions climatiques et hydrographiques.	Dans ce vaste contexte une 6tude seroepid6miologique longitudinale a 6t6 r6alis6e de septembre 1983 a avril 1985	Les r6sultats g6n6raux de cette etude ne paraissent pas en faveur de l'existence de foyers actifs de transmission, neanmoins l'analyse des donnees de certaines oasis et localit6s permettent une appr6ciation diff6rente de la situation Ipid6miologique.					JAHA
Algeria & Oasis	Benzerroug et al (1991)	E. H. Benzerroug,l P. G. Janssens, P. Ambroise-Thomas	1991	Etude seroepidemiologique du paludisme au Sahara algerien	Bulletin de lOrganisation mondiale de la Santé	69	6	713-723		Tit	22.964391	5.195068	Algeria	Parasitology	I'analyse des donnees historiques sur le paludisme dans la region saharienne montre que la situation 6pid6miologique semble etroitement liee aux conditions climatiques et hydrographiques.	Dans ce vaste contexte une 6tude seroepid6miologique longitudinale a 6t6 r6alis6e de septembre 1983 a avril 1985	Les r6sultats g6n6raux de cette etude ne paraissent pas en faveur de l'existence de foyers actifs de transmission, neanmoins l'analyse des donnees de certaines oasis et localit6s permettent une appr6ciation diff6rente de la situation Ipid6miologique.					JAHA
Algeria & Oasis	Benzerroug et al (1991)	E. H. Benzerroug,l P. G. Janssens, P. Ambroise-Thomas	1991	Etude seroepidemiologique du paludisme au Sahara algerien	Bulletin de lOrganisation mondiale de la Santé	69	6	713-723		Amsel	22.630966	5.455723	Algeria	Parasitology	I'analyse des donnees historiques sur le paludisme dans la region saharienne montre que la situation 6pid6miologique semble etroitement liee aux conditions climatiques et hydrographiques.	Dans ce vaste contexte une 6tude seroepid6miologique longitudinale a 6t6 r6alis6e de septembre 1983 a avril 1985	Les r6sultats g6n6raux de cette etude ne paraissent pas en faveur de l'existence de foyers actifs de transmission, neanmoins l'analyse des donnees de certaines oasis et localit6s permettent une appr6ciation diff6rente de la situation Ipid6miologique.					JAHA
Algeria & Oasis	Benziouche & Chehat (2019)	Salah Eddine Benziouche, Foued Chehat	2019	Irrigation problem in Ziban oases (Algeria): causes and consequences	Environment, Development and Sustainability	21		2693-2706	10.1007/s10668-018-0155-6	Biskra oasis	34.833333	5.750000	Algeria	Hidrology	This constraint is analyzed basing on concrete case of the performances of the date palm farms of the region of Tolga (Department of Biskra).	A work was carried out through a survey of 170 farms and interviews with institutions that have relations with the subject	The study showed that the irrigation situation in these palm groves remains inefficient and that the main irrigation indicators remain far from the recommended standards; although the improvement recorded through the support programs.	Date palm	Phoenix dactylifera			JAHA
Algeria & Oasis	Berkal et al (2014)	Ismaiel Berkal, Christian Walter, Didier Michot, and Kaddour Djili	2014	Seasonal monitoring of soil salinity by electromagnetic conductivity in irrigated sandy soils from a Saharan oasis	Soil Research	52		769-780	10.1071/SR13305	Ourlaga	31.949090	5.300479	Algeria	Hidrology	Monitoring soil salinity over time is a crucial issue in Saharan oases to anticipate salinisation related to insufficient irrigation management.	This project tested the ability of electromagnetic conductivity surveys to describe, by means of regression-tree inference models, spatiotemporal changes in soil salinity at different depths within a complex 10-ha pattern of irrigated plots in an Algerian oasis	Soils were sandy Aridic Salic Solonchaks with a fluctuating saline watertable at less than 2 m. Apparent electrical conductivity (ECa) was measured by an EM38 device at fixed 10- or 20-m intervals (2889 points) at four sampling dates between March 2009 and November 2010	Phoenix dactylifera	Phoenix dactylifera			JAHA
Algeria & Oasis	Berkouk et al (2020)	Djihed Berkouk , Tallal Abdel Karim Bouzir, Luigi Ma ,Massimiliano Masullo	2020	Examining the Associations between Oases Soundscape Components and Walking Speed: Correlation or Causation?	Sustainability	12		4619	10.3390/su12114619	Branis	34.993667	5.77534	Algeria	Human impact	examine the correlation and the causation between oases soundscape components and walking speed	The methodology of this field study was based on an empirical approach at the urban settlements in three oases in Algeria. The correlation between walking speed and soundscape components was obtained through the use of the Spearman correlation test. A one-way ANOVA analysis was conducted to assess the e ect of the soundscape components on walking speed. A post hoc Tukey test was adopted to explor…	no significant correlation was explored between the walking speed and the anthrophonical sounds. In contrast, the statistical analysis of the sound walks experience suggests a moderate and significant negative correlation between geophonical and biophonical sounds, with mean walking speed					JAHA
Algeria & Oasis	Berkouk et al (2020)	Djihed Berkouk , Tallal Abdel Karim Bouzir, Luigi Ma ,Massimiliano Masullo	2020	Examining the Associations between Oases Soundscape Components and Walking Speed: Correlation or Causation?	Sustainability	12		4619	10.3390/su12114619	Chetma	34.846762	5.803364	Algeria	Human impact	examine the correlation and the causation between oases soundscape components and walking speed	The methodology of this field study was based on an empirical approach at the urban settlements in three oases in Algeria. The correlation between walking speed and soundscape components was obtained through the use of the Spearman correlation test. A one-way ANOVA analysis was conducted to assess the e ect of the soundscape components on walking speed. A post hoc Tukey test was adopted to explor…	no significant correlation was explored between the walking speed and the anthrophonical sounds. In contrast, the statistical analysis of the sound walks experience suggests a moderate and significant negative correlation between geophonical and biophonical sounds, with mean walking speed					JAHA
Algeria & Oasis	Berkouk et al (2020)	Djihed Berkouk , Tallal Abdel Karim Bouzir, Luigi Ma ,Massimiliano Masullo	2020	Examining the Associations between Oases Soundscape Components and Walking Speed: Correlation or Causation?	Sustainability	12		4619	10.3390/su12114619	M'Chouneche	34.940916	5.999221	Algeria	Human impact	examine the correlation and the causation between oases soundscape components and walking speed	The methodology of this field study was based on an empirical approach at the urban settlements in three oases in Algeria. The correlation between walking speed and soundscape components was obtained through the use of the Spearman correlation test. A one-way ANOVA analysis was conducted to assess the e ect of the soundscape components on walking speed. A post hoc Tukey test was adopted to explor…	no significant correlation was explored between the walking speed and the anthrophonical sounds. In contrast, the statistical analysis of the sound walks experience suggests a moderate and significant negative correlation between geophonical and biophonical sounds, with mean walking speed					JAHA
Algeria & Oasis	Boualla et al (2020)	M'hammed Bouallalaa, Souad Neffar, Haroun Chenchouni	2020	Vegetation traits are accurate indicators of how do plants beat the heat in drylands: Diversity and functional traits of vegetation associated with water towers in the Sahara Desert	Ecological Indicators	114		106364	10.1016/j.ecolind.2020.106364	Adrar	27.863963	-0.302499	Algeria	Diversity	understand the vegetation–water relationship in xeric environments, the present study focused on estimating diversity and determining functional traits of plant communities established around water points developed near water towers in the region of Adrar (Sahara Desert of Algeria)	Based on data collected from 31 phytoecological relevés, spontaneous vegetation was analyzed using diversity parameters (viz. species richness, diversity, richness estimation and similarity), and plant functional traits ‘PFT’ (viz. life forms, morphological, phytogeographical and dispersal types, Grime’s and Noy-Meir’s strategies).	A total of 4695 individuals belonging to 53 plant species and 23 families were collected. Rarefaction and extrapolation curves applied for all the surveys carried out indicated that the estimated species richness is projected to be 77.2 ± 10 species from 31 survey plots and it is predicted to reach up to 116 ± 30 species from 200 survey plots, which represents an increase of 119% of the observed …		Tetraena alba,Caroxylon imbricatum,Tamarix gallica,Vachellia tortilis ssp. raddiana,Anethum graveolens,Chenopodium murale,Cynodon dactylon,Euphorbia granulata,Farsetia stylosa,Imperata cylindrica,Lactuca serriola,Launaea capitata,Polygonum argyrocoleum,Prosopis juliflora,Senecio massaicus,Sphenopus divaricatus,Imperata cylindrica,Phragmites australis,Tamarix gallica,Symphyotrichum subulatum,Calot…			JAHA
Algeria & Oasis	Bouarfa et al (2009)	S. BOUARFA, S. MARLET, A. DOUAOUI, T. HARTANI, I. MEKKI, W. GHAZOUANI, I. BEN AISSA, B. VINCENT, F. HASSANI AND M. KUPER	2009	SALINITY PATTERNS IN IRRIGATION SYSTEMS, A THREAT TO BE DEMYSTIFIED, A CONSTRAINT TO BE MANAGED: FIELD EVIDENCE FROM ALGERIA AND TUNISIA	IRRIGATION AND DRAINAGE	58		S273-S284	10.1002/ird.524	Fatnassa	33.786917	8.761554	Tunisia	Hidrology	assess the dynamics of soil salinity and water quality together with farmers’ salinity management practices	we adapted a common approach to analyze two contrasted salinity patterns: a traditional salinity pattern in an oasis (Fatnassa, Tunisia), and a recent sodicity pattern in a large irrigation scheme (Lower Chelif, Algeria). This approach which combines surveys on farmers’ perceptions and practices and salinity measurements and geochemical analysis	paves the way for more integrated management of salinity problems related to water scarcity.	palm trees (Phoenix dactylifera), fruit trees and fodder crops	Phoenix dactylidera			JAHA
Algeria & Oasis	Boudali et al (2020)	Selma Farah Boudali, Ahmed S. Al-Jumaili, Ameur Bouandas, Fatima Zohra Mahammi, Nacera Tabet Aoul Olivier Hanotte and Semir Bechir Suheil Gaouar	2020	Maternal origin and genetic diversity of Algerian domestic chicken (Gallus gallus domesticus) from North-Western Africa based on mitochondrial DNA analysis	Animal Biotechnology				10.1080/10495398.2020.1803892	Adrar	27.863963	-0.302499	Algeria	Genetics	assess genetic diversity and maternal origin of domestic chicken from five agro-ecological regions of western Algeria: coastal (CT), inland plains (IP), highlands (HL), mountains (MT) and sahara (SH, including Oasis, Req and Erg regions).	A set of 88 mitochondrial DNA (mtDNA) D-loop sequences including the hypervariable region I (HV1) were analyzed.	From the 397 bp Dloop sequence, 20 variable sites that defined 13 haplotypes were identified in Algerian domestic chicken. The haplotype and nucleotide diversity were estimated as 0.597 and 0.003, respectively.					JAHA
Algeria & Oasis	Boufennara et al (2016)	Souhil Boufennara, Lyas Bouazza, Antonio de Vega, Manuel Fondevila, Zahia Amanzougarene, Secundino Lopez	2016	In vitro assessment of nutritive value of date palm by-products as feed for ruminants	Emirates Journal of Food and Agriculture	28	10	695-703	10.9755/ejfa.2016-01-104	Biskra oasis	34.833333	5.750000	Algeria	Agronomy	assess in vitro the chemical composition and nutritional value of these DPBP, including waste dates from three varieties (Bouarus, Harchaya and Kentichi).	Chemical analysis	Palm leaves showed the highest NDF, ADF, lignin and crude protein contents (609, 435, 84, 64 g kg-1 DM, respectively). Cumulative gas production at 144 h of incubation was greatest for Kentichi dates (330 mL g-1DM and lowest for date-pits (69 mL g-1DM). Regardless of the variety, waste dates showed the highest DM effective ruminal degradability (ED=0.48-0.49; estimated for a passage rate of 0.03 …					JAHA
Algeria & Oasis	Bousdira et al (2014)	Khalida Bousdira, L’hadi Nouri, Jack Legrand	2014	Chemical Characterization of Phoenicicole Biomass Fuel in Algerian Oasis: Deglet Nour and Ghars Cultivars Case	Energy Fuels	28		7483-7493	10.1021/ef501522n	Guerrera	32.781166	4.497288	Algeria	Energy	chemical characterization of the phoenicicole biomass to better apprehend the process of energy extraction	we computed the elementary composition and the calorific value using numerical models. An analysis of the links between these parameters was also conducted. Through the study of approximate composition it has been found that the moisture content is relatively small and ash concentration varies between the studied cultivars and their byproducts	Typical found value varies between 5 to 20%.					JAHA
Algeria & Oasis	Bousdira et al (2018)	Khalida Bousdira, Dina Bousdira, Sidi Mohammed El Amine Bekkouche, Fatma Zohra Yahiaoui, L’Hadi Nouri, Jack Legrand	2018	Combustion Study of Phoenicicole Biomass in Algerian Oasis Using Thermogravimetric Analysis: Deglet Nour Cultivar Case	The Arabian Journal for Science and Engineering	43		2299-2308	10.1007/s13369-017-2723-8	Guerrera	32.781166	4.497288	Algeria	Energy	to study the thermal behavior, under an oxidative atmosphere of the phoenicicole biomass main constituents related to the dominant cultivar, Deglet Nour	Thermogravimetric analysis is the approach used to study the pyrolysis behavior of this lignocellulosic biomass by the determination of the kinetic constant (activation energy, order of the reaction, pre-exponential factor) and the description of different thermal profiles	The results show that combustion process could be an interesting alternative energy recovery for the phoenicicole biomass. This is explained by the low activation energy which is estimated at an average of 29.06 k J/mol and the lowresidues generated by the thermoconversion					JAHA
Algeria & Oasis	Boutadara et al (2018)	Youcef Boutadara, Boualem Remini, Saida Benmamar	2018	The foggaras of Bouda (Algeria): from drought to flood	Applied Water Science	8		162	10.1007/s13201-018-0822-7	Bouda	27.963173	-0.433162	Algeria	Hidrology	examines an original hydraulic phenomenon that occurred recently in the oasis of Bouda in the wilaya of Adrar (Algeria)	Review	The phenomenon is starting to grow; sebkhas and palm groves are today flooded by the surplus of waters of foggaras.					JAHA
Algeria & Oasis	Bouzir et al (2020)	Tallal Abdel Karim Bouzir, Djihed Berkouk, Noureddine Zemmouri	2020	Evaluation and Analysis of the Algerian Oases Soundscape: Case of El Kantara and Sidi Okba	Acoustics Australia	48		131-140	10.1007/s40857-019-00173-2	El Kantara	35.217562	5.702055	Algeria	Human impact	The present research focuses on the soundscapes of two localities representative of the oasis cities of southeast Algeria, Sidi Okba and El Kantara, in order to define the nature of the soundscapes and the impact that road traffic can have on them	In this paper, the method of sound walks has been used in order to record the sound experience of city dwellers in pre-selected routes.	The current nature of sounds and the exposure levels, especially in new urban centers, and the extinction of these oases could have a negative impact on the general comfort and health of the inhabitants and on the sensitive natural biodiversity of these fragile human settlements, increasing the risk of the syndrome of sick cities					JAHA
Algeria & Oasis	Bouzir et al (2020)	Tallal Abdel Karim Bouzir, Djihed Berkouk, Noureddine Zemmouri	2020	Evaluation and Analysis of the Algerian Oases Soundscape: Case of El Kantara and Sidi Okba	Acoustics Australia	48		131-140	10.1007/s40857-019-00173-2	Sidi Okba	34.756215	5.891405	Algeria	Human impact	The present research focuses on the soundscapes of two localities representative of the oasis cities of southeast Algeria, Sidi Okba and El Kantara, in order to define the nature of the soundscapes and the impact that road traffic can have on them	In this paper, the method of sound walks has been used in order to record the sound experience of city dwellers in pre-selected routes.	The current nature of sounds and the exposure levels, especially in new urban centers, and the extinction of these oases could have a negative impact on the general comfort and health of the inhabitants and on the sensitive natural biodiversity of these fragile human settlements, increasing the risk of the syndrome of sick cities					JAHA
Algeria & Oasis	Brahmi et al (2012)	Karima BRAHMI, El Amin KHECHEKHOUCHE, Otman MOSTEFAOUI, Salaheddine DOUMANDJI, Belkacem BAZIZ and Stéphane AULAGNIER	2012	First quantitative data on the diet of the fennec fox, Vulpes zerda (Canidae, Carnivora), in Algeria	Folia Zoologica	61	1	61-70	10.25225/fozo.v61.i1.a10.2012	Guemar	33.522467	6.783543	Algeria	Zoology	The diet of fennec fox has been investigated	from scats collected during one year in three localities of the north-eastern Algerian Sahara: Guemar and Sanderouce (near Oued Souf) and Bamendil (near Ouargla).	In Guemar, 160 items in 20 scats were identified including 93 insects (58.1 %), 11 plant fragments (6.9 %) and 38 dates of Phoenix dactylifera (23.8 %). In terms of biomass, with 37.4 % plant material was the most abundant, followed by birds (29.9 %) and mammals (14.9 %). In Sanderouce, 491 items in 37 scats were identified including 377 insects (77.1 %), 10 plant fragments (2.0 %) and 29 dates (…	Phoenix dactylifera, Olea europaea	Malva aegyptiaca,Retama retam,Phoenix dactylifera,Olea europaea	“ghouts”	Vulpes zerda	JAHA
Algeria & Oasis	Brahmi et al (2012)	Karima BRAHMI, El Amin KHECHEKHOUCHE, Otman MOSTEFAOUI, Salaheddine DOUMANDJI, Belkacem BAZIZ and Stéphane AULAGNIER	2012	First quantitative data on the diet of the fennec fox, Vulpes zerda (Canidae, Carnivora), in Algeria	Folia Zoologica	61	1	61-70	10.25225/fozo.v61.i1.a10.2012	Sanderouce	33.544379	7.005499	Algeria	Zoology	The diet of fennec fox has been investigated	from scats collected during one year in three localities of the north-eastern Algerian Sahara: Guemar and Sanderouce (near Oued Souf) and Bamendil (near Ouargla).	In Guemar, 160 items in 20 scats were identified including 93 insects (58.1 %), 11 plant fragments (6.9 %) and 38 dates of Phoenix dactylifera (23.8 %). In terms of biomass, with 37.4 % plant material was the most abundant, followed by birds (29.9 %) and mammals (14.9 %). In Sanderouce, 491 items in 37 scats were identified including 377 insects (77.1 %), 10 plant fragments (2.0 %) and 29 dates (…	Phoenix dactylifera, Olea europaea	Phoenix dactylifera,Olea europaea	“ghouts”	Vulpes zerda	JAHA
Algeria & Oasis	Brahmi et al (2012)	Karima BRAHMI, El Amin KHECHEKHOUCHE, Otman MOSTEFAOUI, Salaheddine DOUMANDJI, Belkacem BAZIZ and Stéphane AULAGNIER	2012	First quantitative data on the diet of the fennec fox, Vulpes zerda (Canidae, Carnivora), in Algeria	Folia Zoologica	61	1	61-70	10.25225/fozo.v61.i1.a10.2012	Bamendil	31.979291	5.288575	Algeria	Zoology	The diet of fennec fox has been investigated	from scats collected during one year in three localities of the north-eastern Algerian Sahara: Guemar and Sanderouce (near Oued Souf) and Bamendil (near Ouargla).	In Guemar, 160 items in 20 scats were identified including 93 insects (58.1 %), 11 plant fragments (6.9 %) and 38 dates of Phoenix dactylifera (23.8 %). In terms of biomass, with 37.4 % plant material was the most abundant, followed by birds (29.9 %) and mammals (14.9 %). In Sanderouce, 491 items in 37 scats were identified including 377 insects (77.1 %), 10 plant fragments (2.0 %) and 29 dates (…				Vulpes zerda	JAHA
Algeria & Oasis	Churcher et al (2006)	Charles S. CHURCHER, Gerardo DE IULIIS, Maxine R. KLEINDIENST	2006	A new genus for the Dipnoan species Ceratodus tuberculatus Tabaste, 1963	Geodiversitas	28	4	635-647		Kharga oasis	25.452550	30.555723	Egypt	Paleontology	Description of a new genus	A tooth plate of the large lungfish referred to Ceratodus tuberculatus Tabaste, 1963 from Kharga Oasis, Egypt, allows reconsideration of its generic status.	Comparisons with fossil Ceratodus and living Neoceratodus demonstrate the generic distinction of this taxon and Retodus n. gen. is proposed for this large dipnoan					JAHA
Algeria & Oasis	DAOUDI ET AL (2017)	Ali Daoudi, Caroline Lejars3, et Nesrine Benouniche	2017	La gouvernance de l’eau souterraine dans le Sahara algérien : enjeux, cadre légal et pratiques locales	Cahiers Agricultures	26		35004	10.1051/cagri/2017021	El Ghrous	34.708430	5.326757	Algeria	Hidrology	Since the discovery of its large water potential, the Sahara, where the oasis agriculture was in difficulty, has been considered as an opportunity for Algerian agriculture	we analyze one of the key factors that promote and threaten this agricultural expansion: the groundwater governance system.	We show that the adaptability of this agriculture is mainly the result of a complex set of actors, at bilateral and collective levels, who manage to reconfigure and adapt the institutional framework of water governance.					JAHA
Algeria & Oasis	Deddabi et al (2020)	Olfa Saddoud Deddabi , Cinzia Montemurro , Sihem Ben Maachia , Fathi Ben Amar ,Valentina Fanelli , Susanna Gadaleta , Milad El Riachy , Ali Chehade , Mona Siblini , Saliha Bouche, Monica Marilena Miazzi	2020	A Hot Spot of Olive Biodiversity in the Tunisian Oasis of Degache	diversity	12		358	10.3390/d12090358	Degache	33.987697	8.235603	Tunisia	Genetics	Genetic diversity of olives	Identification and authentication of genotypes were obtained through comparison with reference cultivars belonging to the Olive National Collection of Tunisia (IOC) and with cultivars from Algeria, Italia, Syria and Lebanon.	large genetic variability, a significant diversity from the reference germplasm, and a clear di erentiation from modern varieties					JAHA
Algeria & Oasis	Deghiche-Diab et al (2015)	Nassima Deghiche-Diab, Francisco Porcelli, and Mohamed Belhamra	2015	Entomofauna of Ziban Oasis, Biskra, Algeria	Journal of Insect Science	15	41	1-7	10.1093/jisesa/ieu170	Ziban	34.822261	5.776596	Algeria	Diversity	An inventory was carried out at five stations in the oasis of Ziban, an oasis that is characterized by ist high-quality dates, in order to study the relationships between the oasis ecosystem and its insect fauna	Specimens were sampled using pitfall traps containing ethylene glycol as a preservative	In total, 115 arthropod species were collected during 5 months of survey. These species belonged to 61 families, 17 orders, and 4 classes (12 orders from Insecta, 3 from Arachnida, 1 from Chilopoda, and 1 from Malocostraca).				Tripinota (epicometis) hirta,Tropinota squalida,Psyllobara viaintiduopunctata,Coccinella septempunctata,Agrilus scythicus,Pimelia payraudi,Diaperis maculata,Gonocephalum granulatum nigrum,Blaps sp,Coelocnemis obesa,Anidorus sanguinolentus,Calosoma inquisitor,Carabus sp,Brachinus explodens,Lophyra flexuosa,Anthia duodecimguttata,Psilothrix viridicoerulea,Macrodactylus subspinosus,Anomala marginata…	JAHA
Algeria & Oasis	Dhaouadi et al (2020)	Latifa Dhaouadi, Houda Besser, FatmaWassar, Nissaf Kharbout, Naima Ben Brahim, Mohamed As Wahba, Yaohu Kang Kang	2020	Agriculture sustainability in arid lands of southern Tunisia: Ecological impacts of irrigation water quality and human practices	Irrigation and Drainage			1-23	10.1002/ird.2492	Nefzaoua	33.559739	8.937037	Algeria	Agronomy	evaluate the suitability of the sampled water from the Complex Terminal aquifer for irrigation purposes and to determine the potential impacts of their long-term use within the present agricultural practices on soil properties	Chemical analysis	The calculated ionic ratios indicate different classes ranging from permissible to unsuitable waters with respect to alkalinity standards (sodium adsorption ratio from 3.68 to 9.34, %Na from 36.7 to 61.2, and rill erodibility from 0.48 to 1.43). Water samples present high values of electrical conductivity, total dissolved solids, and potential salinity, about 54.5, 29.4, and 32.2%, respectively, …					JAHA
Algeria & Oasis	Djaoudene et al (2019)	Ouarda Djaoudene, Víctor López, Guillermo Cásedas, Francisco Les, Connie Schisano, Mostapha Bachir Beya, Gian Carlo Tenore	2019	Phoenix dactylifera L. seeds: a by-product as a source of bioactive compounds with antioxidant and enzyme inhibitory properties	Food & Function	10		4953	10.1039/c9fo01125k	M'zab	32.472987	3.706811	Algeria	Agronomy	date seeds from eight cultivars (Ourous “OUR”, Tazizaout “TAZ”, Tazarzeit “TAR”, Tazoughart “TAG”, Ouaouchet “OUC”, Oukasaba “OUK”, Delat “DEL” and Tamezwertn’telet “TWT”) cultivated in the M’zab oasis (south of Algeria) were analyzed for their chemical and phytochemical compositions	Chemical analysis	Variations in chemical compositions were observed in the studied date seeds. The greatest contents of total phenolic compounds (476 mg GAE per g dw), total flavonoids (6.52 mg QE per g dw), anthocyanins (1.26 mg Q3GE per g dw), flavonols (3.36 mg Q3GE per g dw), proanthocyanidins (85.13 mg CE per g dw), and ascorbic acid were detected in the seeds of the TAG cultivar	Phoenix dactylifera	Phoenix dactylifera			JAHA
Algeria & Oasis	Djemel et al (2019)	Abderahmane Djemel, Lorena Álvarez‑Iglesias,Rogelio Santiago,Rosa Ana Malvar,Nuria Pedrol, Pedro Revilla	2019	Algerian maize populations from the Sahara desert as potential sources of drought tolerance	Acta Physiologiae Plantarum	41	12	1-13	10.1007/s11738-019-2806-0	Touggourt	33.114837	6.091385	Algeria	Agronomy	identify new sources and mechanisms of drought tolerance and to study the traits controlling plant growth under drought and their associations with yield.	We evaluated a collection of 18 maize populations from the Algerian Saharan oases under simulated drought conditions using Polyethylene glycol 6000, and in the field.	The genotype × treatment interactions were more significant under field than under control conditions. Under field conditions, based on general agronomic performance, PI527476, PI542678 and PI527474 were the most drought-tolerant populations	maize (Zea mays L.)	Zea mays			JAHA
Algeria & Oasis	Djemel et al (2019)	Abderahmane Djemel, Lorena Álvarez‑Iglesias,Rogelio Santiago,Rosa Ana Malvar,Nuria Pedrol, Pedro Revilla	2019	Algerian maize populations from the Sahara desert as potential sources of drought tolerance	Acta Physiologiae Plantarum	41	12	1-13	10.1007/s11738-019-2806-0	Gahardaia	32.505537	3.644220	Algeria	Agronomy	identify new sources and mechanisms of drought tolerance and to study the traits controlling plant growth under drought and their associations with yield.	We evaluated a collection of 18 maize populations from the Algerian Saharan oases under simulated drought conditions using Polyethylene glycol 6000, and in the field.	The genotype × treatment interactions were more significant under field than under control conditions. Under field conditions, based on general agronomic performance, PI527476, PI542678 and PI527474 were the most drought-tolerant populations	maize (Zea mays L.)	Zea mays			JAHA
Algeria & Oasis	Djemel et al (2019)	Abderahmane Djemel, Lorena Álvarez‑Iglesias,Rogelio Santiago,Rosa Ana Malvar,Nuria Pedrol, Pedro Revilla	2019	Algerian maize populations from the Sahara desert as potential sources of drought tolerance	Acta Physiologiae Plantarum	41	12	1-13	10.1007/s11738-019-2806-0	Adrar	27.863963	-0.302499	Algeria	Agronomy	identify new sources and mechanisms of drought tolerance and to study the traits controlling plant growth under drought and their associations with yield.	We evaluated a collection of 18 maize populations from the Algerian Saharan oases under simulated drought conditions using Polyethylene glycol 6000, and in the field.	The genotype × treatment interactions were more significant under field than under control conditions. Under field conditions, based on general agronomic performance, PI527476, PI542678 and PI527474 were the most drought-tolerant populations	maize (Zea mays L.)	Zea mays			JAHA
Algeria & Oasis	Djemel et al (2019)	Abderahmane Djemel, Lorena Álvarez‑Iglesias,Rogelio Santiago,Rosa Ana Malvar,Nuria Pedrol, Pedro Revilla	2019	Algerian maize populations from the Sahara desert as potential sources of drought tolerance	Acta Physiologiae Plantarum	41	12	1-13	10.1007/s11738-019-2806-0	Bechar	31.663373	-2.170670	Algeria	Agronomy	identify new sources and mechanisms of drought tolerance and to study the traits controlling plant growth under drought and their associations with yield.	We evaluated a collection of 18 maize populations from the Algerian Saharan oases under simulated drought conditions using Polyethylene glycol 6000, and in the field.	The genotype × treatment interactions were more significant under field than under control conditions. Under field conditions, based on general agronomic performance, PI527476, PI542678 and PI527474 were the most drought-tolerant populations	maize (Zea mays L.)	Zea mays			JAHA
Algeria & Oasis	Djemel et al (2019)	Abderahmane Djemel, Lorena Álvarez‑Iglesias,Rogelio Santiago,Rosa Ana Malvar,Nuria Pedrol, Pedro Revilla	2019	Algerian maize populations from the Sahara desert as potential sources of drought tolerance	Acta Physiologiae Plantarum	41	12	1-13	10.1007/s11738-019-2806-0	Tamanrasset	22.782985	5.531405	Algeria	Agronomy	identify new sources and mechanisms of drought tolerance and to study the traits controlling plant growth under drought and their associations with yield.	We evaluated a collection of 18 maize populations from the Algerian Saharan oases under simulated drought conditions using Polyethylene glycol 6000, and in the field.	The genotype × treatment interactions were more significant under field than under control conditions. Under field conditions, based on general agronomic performance, PI527476, PI542678 and PI527474 were the most drought-tolerant populations	maize (Zea mays L.)	Zea mays			JAHA
Algeria & Oasis	Faci et al (2019)	Mohammed Faci	2019	Typology and varietal biodiversity of date palm farms in the North-East of Algerian Sahara	JOURNAL OF TAIBAH UNIVERSITY FOR SCIENCE	13	1	764-771	10.1080/16583655.2019.1633006	Ouargla oasis	31.966667	5.333333	Algeria	Agronomy	Varietal diversity of date palm	Review	These palm grove have aged palm, high height and a fragile stamina which limiting the cultural operations and affecting grimly the production. Actually, the old palm groves in the North-east of Algerian Sahara are divided into types: “Bour” and “Old palm groves					JAHA
Algeria & Oasis	Farooqui et al (2012)	Mohammed Y. Farooqui, Khamis Farhoud, Dia Mahmoud, Ahmed N. El-Barkooky	2012	Petroleum potential of the interpreted Paleozoic geoseismic sequences in the South Diyur Block, Western Desert of Egypt	GeoArabia	17	3	133-176	10.2113/geoarabia1703133	Farafra	27.056532	27.962671	Egypt	Energy	Look for petroleum	Seismic activity	In order to identify future exploration plays and drill targets, additional 2-D seismic (4,490 line-km), aeromagnetic and airborne gravity surveys will be integrated with the present seismic data and drilling results from Ammonite-1					JAHA
Algeria & Oasis	Freyhof et al (2020)	Jörg Freyhof, Giovanni A. C. Balma, Giovanni B. Delmastro	2020	A small historic collection of freshwater fishes from Tunisia and Algeria	Ichthyological Exploration of Freshwaters			1-8	10.23788/IEF-1148	Lalla	34.394480	8.832996	Algeria	Diversity	The results of a historic ichthyological expedition to Algeria and Tunisia are presented.	fish census	In September 1982, 14 species were recorded at 32 locations.				Haplochromis desfontainii	JAHA
Algeria & Oasis	Freyhof et al (2020)	Jörg Freyhof, Giovanni A. C. Balma, Giovanni B. Delmastro	2020	A small historic collection of freshwater fishes from Tunisia and Algeria	Ichthyological Exploration of Freshwaters			1-8	10.23788/IEF-1148	Oued el Melah	34.330617	8.572920	Algeria	Diversity	The results of a historic ichthyological expedition to Algeria and Tunisia are presented.	fish census	In September 1982, 14 species were recorded at 32 locations.				Aphanius fasciatus	JAHA
Algeria & Oasis	Freyhof et al (2020)	Jörg Freyhof, Giovanni A. C. Balma, Giovanni B. Delmastro	2020	A small historic collection of freshwater fishes from Tunisia and Algeria	Ichthyological Exploration of Freshwaters			1-8	10.23788/IEF-1148	Mides	34.409054	7.918945	Tunisia	Diversity	The results of a historic ichthyological expedition to Algeria and Tunisia are presented.	fish census	In September 1982, 14 species were recorded at 32 locations.				Gambusia holbrooki	JAHA
Algeria & Oasis	Freyhof et al (2020)	Jörg Freyhof, Giovanni A. C. Balma, Giovanni B. Delmastro	2020	A small historic collection of freshwater fishes from Tunisia and Algeria	Ichthyological Exploration of Freshwaters			1-8	10.23788/IEF-1148	Tamerza	34.382928	7.936909	Tunisia	Diversity	The results of a historic ichthyological expedition to Algeria and Tunisia are presented.	fish census	In September 1982, 14 species were recorded at 32 locations.				Gambusia holbrooki	JAHA
Algeria & Oasis	Freyhof et al (2020)	Jörg Freyhof, Giovanni A. C. Balma, Giovanni B. Delmastro	2020	A small historic collection of freshwater fishes from Tunisia and Algeria	Ichthyological Exploration of Freshwaters			1-8	10.23788/IEF-1148	Tozeur oasis	33.902500	8.145556	Tunisia	Diversity	The results of a historic ichthyological expedition to Algeria and Tunisia are presented.	fish census	In September 1982, 14 species were recorded at 32 locations.				Haplochromis desfontainii	JAHA
Algeria & Oasis	Freyhof et al (2020)	Jörg Freyhof, Giovanni A. C. Balma, Giovanni B. Delmastro	2020	A small historic collection of freshwater fishes from Tunisia and Algeria	Ichthyological Exploration of Freshwaters			1-8	10.23788/IEF-1148	Nefta	33.861150	7.882884	Tunisia	Diversity	The results of a historic ichthyological expedition to Algeria and Tunisia are presented.	fish census	In September 1982, 14 species were recorded at 32 locations.				Gambusia holbrooki,Haplochromis desfontainii	JAHA
Algeria & Oasis	Freyhof et al (2020)	Jörg Freyhof, Giovanni A. C. Balma, Giovanni B. Delmastro	2020	A small historic collection of freshwater fishes from Tunisia and Algeria	Ichthyological Exploration of Freshwaters			1-8	10.23788/IEF-1148	El Oued	33.353979	6.880949	Algeria	Diversity	The results of a historic ichthyological expedition to Algeria and Tunisia are presented.	fish census	In September 1982, 14 species were recorded at 32 locations.				Gambusia holbrooki	JAHA
Algeria & Oasis	Freyhof et al (2020)	Jörg Freyhof, Giovanni A. C. Balma, Giovanni B. Delmastro	2020	A small historic collection of freshwater fishes from Tunisia and Algeria	Ichthyological Exploration of Freshwaters			1-8	10.23788/IEF-1148	Ourlaga	31.949090	5.300479	Algeria	Diversity	The results of a historic ichthyological expedition to Algeria and Tunisia are presented.	fish census	In September 1982, 14 species were recorded at 32 locations.				Gambusia holbrooki	JAHA
Algeria & Oasis	Freyhof et al (2020)	Jörg Freyhof, Giovanni A. C. Balma, Giovanni B. Delmastro	2020	A small historic collection of freshwater fishes from Tunisia and Algeria	Ichthyological Exploration of Freshwaters			1-8	10.23788/IEF-1148	El Menia	30.569519	2.891595	Algeria	Diversity	The results of a historic ichthyological expedition to Algeria and Tunisia are presented.	fish census	In September 1982, 14 species were recorded at 32 locations.				Gambusia holbrooki	JAHA
Algeria & Oasis	Freyhof et al (2020)	Jörg Freyhof, Giovanni A. C. Balma, Giovanni B. Delmastro	2020	A small historic collection of freshwater fishes from Tunisia and Algeria	Ichthyological Exploration of Freshwaters			1-8	10.23788/IEF-1148	In Salah	27.196258	2.461980	Algeria	Diversity	The results of a historic ichthyological expedition to Algeria and Tunisia are presented.	fish census	In September 1982, 14 species were recorded at 32 locations.				Gambusia holbrooki	JAHA
Algeria & Oasis	Freyhof et al (2020)	Jörg Freyhof, Giovanni A. C. Balma, Giovanni B. Delmastro	2020	A small historic collection of freshwater fishes from Tunisia and Algeria	Ichthyological Exploration of Freshwaters			1-8	10.23788/IEF-1148	El Barka	27.179167	2.431389	Algeria	Diversity	The results of a historic ichthyological expedition to Algeria and Tunisia are presented.	fish census	In September 1982, 14 species were recorded at 32 locations.				Gambusia holbrooki	JAHA
Algeria & Oasis	Freyhof et al (2020)	Jörg Freyhof, Giovanni A. C. Balma, Giovanni B. Delmastro	2020	A small historic collection of freshwater fishes from Tunisia and Algeria	Ichthyological Exploration of Freshwaters			1-8	10.23788/IEF-1148	Arak	25.282778	3.746944	Algeria	Diversity	The results of a historic ichthyological expedition to Algeria and Tunisia are presented.	fish census	In September 1982, 14 species were recorded at 32 locations.				Enteromius macrops,	JAHA
Algeria & Oasis	Freyhof et al (2020)	Jörg Freyhof, Giovanni A. C. Balma, Giovanni B. Delmastro	2020	A small historic collection of freshwater fishes from Tunisia and Algeria	Ichthyological Exploration of Freshwaters			1-8	10.23788/IEF-1148	Gueltates Afilal	23.148740	5.733695	Algeria	Diversity	The results of a historic ichthyological expedition to Algeria and Tunisia are presented.	fish census	In September 1982, 14 species were recorded at 32 locations.				Luciobarbus biscarensis	JAHA
Algeria & Oasis	Freyhof et al (2020)	Jörg Freyhof, Giovanni A. C. Balma, Giovanni B. Delmastro	2020	A small historic collection of freshwater fishes from Tunisia and Algeria	Ichthyological Exploration of Freshwaters			1-8	10.23788/IEF-1148	Gueltas d’Issakarassene	23.422729	5.759814	Algeria	Diversity	The results of a historic ichthyological expedition to Algeria and Tunisia are presented.	fish census	In September 1982, 14 species were recorded at 32 locations.				Luciobarbus biscarensis	JAHA
Algeria & Oasis	Freyhof et al (2020)	Jörg Freyhof, Giovanni A. C. Balma, Giovanni B. Delmastro	2020	A small historic collection of freshwater fishes from Tunisia and Algeria	Ichthyological Exploration of Freshwaters			1-8	10.23788/IEF-1148	Guelta d’Edjif Mellène	23.476944	5.781111	Algeria	Diversity	The results of a historic ichthyological expedition to Algeria and Tunisia are presented.	fish census	In September 1982, 14 species were recorded at 32 locations.				Luciobarbus biscarensis	JAHA
Algeria & Oasis	Freyhof et al (2020)	Jörg Freyhof, Giovanni A. C. Balma, Giovanni B. Delmastro	2020	A small historic collection of freshwater fishes from Tunisia and Algeria	Ichthyological Exploration of Freshwaters			1-8	10.23788/IEF-1148	Choucha	33.410275	5.970036	Algeria	Diversity	The results of a historic ichthyological expedition to Algeria and Tunisia are presented.	fish census	In September 1982, 14 species were recorded at 32 locations.				Coptodon zillii	JAHA
Algeria & Oasis	Freyhof et al (2020)	Jörg Freyhof, Giovanni A. C. Balma, Giovanni B. Delmastro	2020	A small historic collection of freshwater fishes from Tunisia and Algeria	Ichthyological Exploration of Freshwaters			1-8	10.23788/IEF-1148	Tamerna	33.441874	5.967529	Algeria	Diversity	The results of a historic ichthyological expedition to Algeria and Tunisia are presented.	fish census	In September 1982, 14 species were recorded at 32 locations.				Aphanius fasciatus,Coptodon zillii	JAHA
Algeria & Oasis	Freyhof et al (2020)	Jörg Freyhof, Giovanni A. C. Balma, Giovanni B. Delmastro	2020	A small historic collection of freshwater fishes from Tunisia and Algeria	Ichthyological Exploration of Freshwaters			1-8	10.23788/IEF-1148	Tolga	34.746265	5.384097	Algeria	Diversity	The results of a historic ichthyological expedition to Algeria and Tunisia are presented.	fish census	In September 1982, 14 species were recorded at 32 locations.				Haplochromis desfontainii,Luciobarbus biscarensis,Tropidophoxinellus callensis,Gambusia holbrooki	JAHA
Algeria & Oasis	Freyhof et al (2020)	Jörg Freyhof, Giovanni A. C. Balma, Giovanni B. Delmastro	2020	A small historic collection of freshwater fishes from Tunisia and Algeria	Ichthyological Exploration of Freshwaters			1-8	10.23788/IEF-1148	Hammam Salahine	34.873755	5.674156	Algeria	Diversity	The results of a historic ichthyological expedition to Algeria and Tunisia are presented.	fish census	In September 1982, 14 species were recorded at 32 locations.				Aphanius fasciatus	JAHA
Algeria & Oasis	Freyhof et al (2020)	Jörg Freyhof, Giovanni A. C. Balma, Giovanni B. Delmastro	2020	A small historic collection of freshwater fishes from Tunisia and Algeria	Ichthyological Exploration of Freshwaters			1-8	10.23788/IEF-1148	Oued El Hai	35.245453	5.699984	Algeria	Diversity	The results of a historic ichthyological expedition to Algeria and Tunisia are presented.	fish census	In September 1982, 14 species were recorded at 32 locations.				Luciobarbus biscarensis	JAHA
Algeria & Oasis	Gastineau et al (2021)	Romain Gastineau, Chahinez Hamedi , Mohammed Bey Baba Hamed , Sidi-Mohammed El-Amine Abi-Ayad , Małgorzata Bąk , Claude Lemieux , Monique Turmel , Sławomir Dobosz , Rafał J. Wr´obel , Agnieszka Kierzek , Horst Lange-Bertalot , Andrzej Witkowski	2021	Morphological and molecular identification reveals that waters from an isolated oasis in Tamanrasset (extreme South of Algerian Sahara) are colonized by opportunistic and pollution-tolerant diatom species	Ecological Indicators	121		107104	10.1016/j.ecolind.2020.107104	Gueltates Afilal	23.148740	5.733695	Algeria	Diversity	Diversity of diatoms	A water sample was obtained from an arheic oasis in the deep Sahara Desert, the Gueltates Afilal in Tamanrasset (Algeria).	Five diatom strains were isolated, cultivated and identified as Tryblionella apiculata, Nitzschia supralitorea, Fistulifera saprophila, Navicula veneta and Thalassiosira pseudonana using a combination of scanning electron microscopy and next generation sequencing				Tryblionella apiculata,Navicula veneta Kützing,Thalassiosira pseudonana,Nitzschia supralitorea,Fistulifera saprophila	JAHA
Algeria & Oasis	Gros-Balthazard et al (2020)	Muriel Gros-Balthazard, Vincent Battesti,Sarah Ivorra, Laure Paradis,Frédérique Aberlenc,Oumarou Zango, Salwa Zehdi-Azouzi, Souhila Moussouni,Summar Abbas Naqvi, Claire Newton, Jean-Frédéric Terral	2020	On the necessity of combining ethnobotany and genetics to assess agrobiodiversity and its evolution in crops: A case study on date palms (Phoenix dactylifera L.) in Siwa Oasis, Egypt	Evolutionary Applications	13		1818-1840	10.1111/eva.12930	Siwa	29.206355	25.531078	Egypt	Agronomy	we combined population genetics and ethnobotany to investigate date palm (Phoenix dactylifera L.) diversity in Siwa Oasis, Egypt	interviews with farmers and observation of practices in the field,	Using genotyping data from 18 nuclear and plastid microsatellite loci, we confirmed that some named types each constitute a clonal line, that is, a true-to-type cultivar.	Phoenix dactylidera	Phoenix dactylidera			JAHA
Algeria & Oasis	Guezoul et al (2013)	Omar Guezoul , Haroun Chenchouni , Makhlouf Sekour , Labed Ababsa , Karim Souttou , Salaheddine Doumandji	2013	An avifaunal survey of mesic manmade ecosystems ‘‘Oases’’ in algerian hot-hyperarid lands	Saudi Journal of Biological Sciences	20		37-43	10.1016/j.sjbs.2012.10.001	Biskra oasis	34.833333	5.750000	Algeria	Diversity	investigated bird diversity in three oases of the Northern Algerian Sahara (i.e., Biskra in 2006, Oued Souf in 2008 and Ouargla in 2009)	the spot-mapping method.	Bird density ‘‘D’’ (pairs/10 ha), species richness ‘‘S’’ (number species), diversity (Shannon index) ‘‘H0’’ (in bits), andevenness ‘‘E’’ variedfromone oasis toanother (Biskra:D=98.5,S=47,H0 =4.49,E=0.81;Oued Souf: D=96, S=33, H0 =3.9, E=0.77; Ouargla: D=91.5, S=44, H0 =4.39, E=0.80)	palm grove fruit trees including olive, apricot and lemon trees and cereals. There are also green-windbreaks represented by Casuarina torulosa, Eucalyptus sp. and Tamarix gallica			Alectoris barbara,Falco tinnunculus,Tyto alba,Bubo ascalaphus,Athene noctua saharae,Columba livia,Columba palumbus,Streptopelia turtur,Streptopelia decaocto,Streptopelia senegalensis,Merops persicus,Merops apiaster,Upupa epops,Lanius meridionalis elegans,Lanius senator,Parus caeruleus,Ammomanes cincturus,Ammomanes deserti,Galerida cristata,Pycnonotus barbatus,Corvus corax,Phylloscopus collybita,P…	JAHA
Algeria & Oasis	Guezoul et al (2013)	Omar Guezoul , Haroun Chenchouni , Makhlouf Sekour , Labed Ababsa , Karim Souttou , Salaheddine Doumandji	2013	An avifaunal survey of mesic manmade ecosystems ‘‘Oases’’ in algerian hot-hyperarid lands	Saudi Journal of Biological Sciences	20		37-43	10.1016/j.sjbs.2012.10.001	Oued Souf oasis	33.365293	6.854822	Algeria	Diversity	investigated bird diversity in three oases of the Northern Algerian Sahara (i.e., Biskra in 2006, Oued Souf in 2008 and Ouargla in 2009)	the spot-mapping method.	Bird density ‘‘D’’ (pairs/10 ha), species richness ‘‘S’’ (number species), diversity (Shannon index) ‘‘H0’’ (in bits), andevenness ‘‘E’’ variedfromone oasis toanother (Biskra:D=98.5,S=47,H0 =4.49,E=0.81;Oued Souf: D=96, S=33, H0 =3.9, E=0.77; Ouargla: D=91.5, S=44, H0 =4.39, E=0.80)				Falco peregrinus,Tyto alba,Athene noctua saharae,Columba livia,Streptopelia turtur,Streptopelia decaocto,Streptopelia senegalensis,Merops apiaster,Upupa epops,Lanius meridionalis elegans,Lanius senator,Ammomanes deserti,Hirundo rustica,Corvus corax,Phylloscopus collybita,Phylloscopus fuscatus,Sturnus vulgaris,Hippolais pallida,Sylvia deserticola,Sylvia melanocephala,Turdus merula,Phoenicurus phoe…	JAHA
Algeria & Oasis	Guezoul et al (2013)	Omar Guezoul , Haroun Chenchouni , Makhlouf Sekour , Labed Ababsa , Karim Souttou , Salaheddine Doumandji	2013	An avifaunal survey of mesic manmade ecosystems ‘‘Oases’’ in algerian hot-hyperarid lands	Saudi Journal of Biological Sciences	20		37-43	10.1016/j.sjbs.2012.10.001	Ouargla oasis	31.966667	5.333333	Algeria	Diversity	investigated bird diversity in three oases of the Northern Algerian Sahara (i.e., Biskra in 2006, Oued Souf in 2008 and Ouargla in 2009)	the spot-mapping method.	Bird density ‘‘D’’ (pairs/10 ha), species richness ‘‘S’’ (number species), diversity (Shannon index) ‘‘H0’’ (in bits), andevenness ‘‘E’’ variedfromone oasis toanother (Biskra:D=98.5,S=47,H0 =4.49,E=0.81;Oued Souf: D=96, S=33, H0 =3.9, E=0.77; Ouargla: D=91.5, S=44, H0 =4.39, E=0.80)				Falco biarmicus,Tyto alba,Bubo ascalaphus,Athene noctua saharae,Columba livia,Streptopelia turtur,Streptopelia decaocto,Streptopelia senegalensis,Merops apiaster,Upupa epops,Lanius meridionalis elegans,Lanius senator,Ammomanes cincturus,Ammomanes deserti,Hirundo rustica,Delichon urbica,Oriolus oriolus,Corvus corax,Phylloscopus collybita,Phylloscopus fuscatus,Acrocephalus schoenobaenus,Hippolais p…	JAHA
Algeria & Oasis	Hadidi et al. (2018)	A. Hadidi, B. Remini, M. Habi, D. Saba	2018	The oasis of Moghrar (southwest Algeria):water resources and management	Water Science & Technology: Water Supply	18	6	2108-2117	10.2166/ws.2018.027	Moghrar	32.491280	-0.467772	Algeria	Hidrology	The objective of this study is to make an inventory of all water sources in the study area, to study the impact of the contribution of modern techniques on ancestral techniques and finally to propose recommendations for safeguarding the hydraulic heritage.	Review	Problems					JAHA
Algeria & Oasis	Haimoud et al (2015)	SAFIA ALI HAIMOUD,, RACHIDA ALLEM, ABDELAZIZ MEROUANE	2015	ANTIOXIDANT AND ANTI-INFLAMMATORY PROPERTIES OF WIDELY CONSUMED DATE PALM (PHOENIX DACTYLIFERA L.) FRUIT VARIETIES IN ALGERIAN OASES	Journal of Food Biochemistry	40	4	463-471	10.1111/jfbc.12227	el Oued	33.353979	6.880949	Algeria	Food	estimate the antioxidant and anti-inflammatory activities of methanolic extracts of date palm fruits grown in Algeria	Four in vitro methods were employed to evaluate the antioxidant activity (AA), namely bcarotene- linoleic acid system, phosphomolybdenum method, 2,2-diphenyl-1- picrylhydrazyl radical scavenging activity and Ferric-Reducing Antioxidant Power assay. The anti-inflammatory activity was carried out using carrageenan-induced edema model. The extracts were found to be a rich source of polyphenols, flav…	The methanolic extract of Ali Ourached cultivar showed the highest AA for the four methods cited previously (76.85%, 90.25 lmol of ascorbic acid/g of extract, 206 mg/mL and 56.04 lmol Fe (II) = 100 g DW, respectively). Anti-inflammatory findings revealed noticeable reduction of paw volume ranging from 35.64 to 67.56% as a response to oral administration of 250 mg/kg dose of methanolic extracts.					JAHA
Algeria & Oasis	Hamida et al (2013)	F. Hamidaa, M.-L. Atif , M. Temmarb, A. Chibane , A. Bezzaoucha , M.-T. Bouafia	2013	Prévalence de l’hypertension artérielle dans l’oasis d’El-Menia, Algérie, et profil métabolique de la population	Annales de Cardiologie et d’Angéiologie	62		172-178	10.1016/j.ancard.2013.04.008	El Menia	30.569519	2.891595	Algeria	Health	estimate the prevalence of hypertension, to describe the metabolic characteristics of population study and to assess the factors associated with blood pressure levels	A cross sectional study was conducted in 2010. Subjects (n = 722) were selected from individuals aged 40 years or older by random cluster sampling. Blood pressure measurements, combined with a clinical questionnaire, and standard blood samples for the detection of dyslipidemia and diabetes mellitus, were collected	Sixty-seven percent of subjects were females and 18% were black. The mean age was 58.5 ± 13.2 years. The prevalence of hypertension was 50.2%: 49.7% in females and 51.3% in males					JAHA
Algeria & Oasis	Hemidi & Laamari (2020)	Widad Hemidi and Malik Laamari	2020	Aphid’s parasitoid fauna and their trophic associations in the oasis ecosystems of Zibans (Biskra, Algeria)	Hemidi and Laamari Egyptian Journal of Biological Pest Control	30	14	1-8	10.1186/s41938-020-0214-9	Biskra oasis	34.833333	5.750000	Algeria	Ecology	Diversity of trophic interactions	A study on the fauna of aphids’ parasitoids was carried out in the oasis ecosystems of the Ziban in the region of Biskra, Algeria.	Eighteen primary parasitoids species belong to 2 subfamilies; Aphidiinae (Hymenoptera: Ichneumonoidea, Braconidae), represented by 17 species and 6 genera (Aphidius, Diaeretiella, Ephedrus, Lysiphlebus, Praon, and Binodoxys) and the subfamily Aphelininae (Hymenoptera: Chalcidoidea, Aphelinidae), represented by only one species of the genus Aphelinus was listed. The		Avena sativa,Capsella bursa-pastoris,Centaurea sp,Coronilla scorpioides,Dittrichia viscosa,Hordeum vulgare,Lactuca sativa,Lactuca serriola,Launaea nudicaulis,Lepidium draba,Malus domestica,Medicago sativa,Polygonum aviculara,Prunus armeniaca,Punica granatum,Pyrus communis,Rubia tinctorum,Rumex sp,Sonchus oleraceus,Taraxacum officinale,Vicia faba,Vitis vinifera,Solanum nigrum,Chenopodium album,Che…		Acyrthosiphon lactucae,Aphis acetosae,Aphis craccivora,Aphis fabae,Aphis gossypii,Aphis pomi,Aphis punicae,Aphis rumicis,Brachycaudus rumexicolens,Capitophorus inulae,Dysaphis plantaginea,Hyadaphis foeniculi,Hyalopterus pruni,Hyperomyzus lactucae,Metopolophium dirhodum,Myzus persicae,Ovatus inulae,Rhopalosiphum maidis,Therioaphis langloisi,Uroleucon ambrosiae,Uroleucon compositae,Uroleucon sonchi…	JAHA
Algeria & Oasis	Idder et al (2015)	Mohamed Azzedine Idder, Hakima Ighili, Bahia Mitiche, Haroun Chenchouni	2015	Influence of date fruit biochemical characteristics on damage ratescaused by the carob moth (Ectomyelois ceratoniae) in Saharan oases of Algeria	Scientia Horticulturae	190		57-63	10.1016/j.scienta.2015.04.015	N'Goussa	32.135004	5.303528	Algeria	Agronomy	relate the variation of date infestation rates causedby the carob moth to biochemical characteristics of fruits of 20 date palm (Phoenix dactylifera) cultivars	Biochemical analyses were performed on fruits of twenty cultivars sampled in seven palm groves of theregion of Ouargla. Infestation levels caused by the carob moth were assessed at three phenological stagesof fruit ripeness within each cultivar	Date infestation rates significantly varied among study cultivars,fruit maturity stages and their interaction. The cultivar Takermoust was the most infested (43%), whereasBent Khbala and Tati Wtnuh recorded the lowest infestation rates. Tati Wtnuh, Bayd Hmam and Tamsritare cultivars that produce soft dates					JAHA
Algeria & Oasis	Idder et al (2015)	Mohamed Azzedine Idder, Hakima Ighili, Bahia Mitiche, Haroun Chenchouni	2015	Influence of date fruit biochemical characteristics on damage ratescaused by the carob moth (Ectomyelois ceratoniae) in Saharan oases of Algeria	Scientia Horticulturae	190		57-63	10.1016/j.scienta.2015.04.015	Ksar	31.146512	-5.080176	Morocco	Agronomy	relate the variation of date infestation rates causedby the carob moth to biochemical characteristics of fruits of 20 date palm (Phoenix dactylifera) cultivars	Biochemical analyses were performed on fruits of twenty cultivars sampled in seven palm groves of theregion of Ouargla. Infestation levels caused by the carob moth were assessed at three phenological stagesof fruit ripeness within each cultivar	Date infestation rates significantly varied among study cultivars,fruit maturity stages and their interaction. The cultivar Takermoust was the most infested (43%), whereasBent Khbala and Tati Wtnuh recorded the lowest infestation rates. Tati Wtnuh, Bayd Hmam and Tamsritare cultivars that produce soft dates					JAHA
Algeria & Oasis	Idder et al (2015)	Mohamed Azzedine Idder, Hakima Ighili, Bahia Mitiche, Haroun Chenchouni	2015	Influence of date fruit biochemical characteristics on damage ratescaused by the carob moth (Ectomyelois ceratoniae) in Saharan oases of Algeria	Scientia Horticulturae	190		57-63	10.1016/j.scienta.2015.04.015	Ourlaga	31.949090	5.300479	Algeria	Agronomy	relate the variation of date infestation rates causedby the carob moth to biochemical characteristics of fruits of 20 date palm (Phoenix dactylifera) cultivars	Biochemical analyses were performed on fruits of twenty cultivars sampled in seven palm groves of theregion of Ouargla. Infestation levels caused by the carob moth were assessed at three phenological stagesof fruit ripeness within each cultivar	Date infestation rates significantly varied among study cultivars,fruit maturity stages and their interaction. The cultivar Takermoust was the most infested (43%), whereasBent Khbala and Tati Wtnuh recorded the lowest infestation rates. Tati Wtnuh, Bayd Hmam and Tamsritare cultivars that produce soft dates					JAHA
Algeria & Oasis	Idder et al (2015)	Mohamed Azzedine Idder, Hakima Ighili, Bahia Mitiche, Haroun Chenchouni	2015	Influence of date fruit biochemical characteristics on damage ratescaused by the carob moth (Ectomyelois ceratoniae) in Saharan oases of Algeria	Scientia Horticulturae	190		57-63	10.1016/j.scienta.2015.04.015	Hassi Ben Abdallah	32.030070	5.464962	Algeria	Agronomy	relate the variation of date infestation rates causedby the carob moth to biochemical characteristics of fruits of 20 date palm (Phoenix dactylifera) cultivars	Biochemical analyses were performed on fruits of twenty cultivars sampled in seven palm groves of theregion of Ouargla. Infestation levels caused by the carob moth were assessed at three phenological stagesof fruit ripeness within each cultivar	Date infestation rates significantly varied among study cultivars,fruit maturity stages and their interaction. The cultivar Takermoust was the most infested (43%), whereasBent Khbala and Tati Wtnuh recorded the lowest infestation rates. Tati Wtnuh, Bayd Hmam and Tamsritare cultivars that produce soft dates					JAHA
Algeria & Oasis	Idder-Ighili et al (2015)	Hakima Idder-Ighili, Mohamed Azzedine Idder, Bahia Doumandji-Mitiche, Haroun Chenchouni	2015	Modeling the effects of climate on date palm scale (Parlatoria blanchardi) population dynamics during different phenological stages of life history under hot arid conditions	International Journal of Biometeorology	59		1425-1436	10.1007/s00484-014-0952-z	Ourlaga	31.949090	5.300479	Algeria	Agronomy	To develop an effective control against DPS in arid regions, it is essential to know its bio-ecology including population dynamics and climatic factors influencing the duration and timing of life history and also the densities of different phenological stages	Statistical analysis of the effects of the studied climatic conditions (minimum, maximum and mean temperatures, precipitation, humidity, wind, rain days, and climatic indices) on the DPS densities at different phenological stages showed great variability from one stage to another	adult females were the most affected by climate factors				Parlatoria blanchardi	JAHA
Algeria & Oasis	Khezzani & Bouchemal (2018)	Bachir Khezzani, Salah Bouchemal	2018	Variations in groundwater levels and quality due to agricultural over‑exploitation in an arid environment: the phreatic aquifer of the Souf oasis (Algerian Sahara)	Environmental Earth Sciences	77		142	doi.org/10.1007/s12665-018-7329-2	Oued Souf oasis	33.365293	6.854822	Algeria	Agronomy	we followed the variations in water levels in the Souf oasis in the Algerian Sahara	measuring depths to groundwater across 65 points during the period from 2010 to 2015. Additionally, electrical conductivity (EC) was measured for assessing variations in groundwater salinity in the same groundwater monitoring network over the same time interval.	The results from these investigations indicated that there are significant and continuous declines in the groundwater level across all study areas throughout the period of investigation. This is especially the case in the northern part of the study area where the water table declined by up to 18.2 m in Ghamra in 2015	date palm, potatoes, olives, wheat, and various vegetables types	Phoenix dactylidera	groundwater exploitation from the phreatic aquifer that underlies the whole of the region		JAHA
Algeria & Oasis	Loumassine et al (2020)	Hibat Ellah Loumassine, Nadège Bonnot, Benjamin Allegrini, Mohammed Lamine Bendjeddou, Farid Bounaceur, Stéphane Aulagnier	2020	How arid environments affect spatial and temporal activity of bats	Journal of Arid Environments	180		104206	10.1016/j.jaridenv.2020.104206	Bechar	31.663373	-2.170670	Algeria	Zoology	determine the activity patterns and habitat use by bats in an arid environment in western Algeria (Bechar region).	In 2016, six sites were studied using acoustic bat detection.	A total of 10 species were reported: Asellia tridens, Rhinopoma cystops, R. microphyllum, Tadarida teniotis, Miniopterus schreibersii, Eptesicus isabellinus, Hypsugo savii, Otonycteris hemprichii, Pipistrellus kuhlii (including P. kuhlii kuhlii and P. kuhlii deserti) and Vansonia rueppellii.				Asellia tridens,Rhinopoma cystops,R. microphyllum,Tadarida teniotis,Miniopterus schreibersii,Otonycteris hemprichii,Eptesicus isabellinus,Hypsugo savii,Pipistrellus kuhlii,Vansonia rueppellii	JAHA
Algeria & Oasis	Loumassine et al (2020)	Hibat Ellah Loumassine, Nadège Bonnot, Benjamin Allegrini, Mohammed Lamine Bendjeddou, Farid Bounaceur, Stéphane Aulagnier	2020	How arid environments affect spatial and temporal activity of bats	Journal of Arid Environments	180		104206	10.1016/j.jaridenv.2020.104206	Boukais	31.930981	-2.458501	Algeria	Zoology	determine the activity patterns and habitat use by bats in an arid environment in western Algeria (Bechar region).	In 2016, six sites were studied using acoustic bat detection.	A total of 10 species were reported: Asellia tridens, Rhinopoma cystops, R. microphyllum, Tadarida teniotis, Miniopterus schreibersii, Eptesicus isabellinus, Hypsugo savii, Otonycteris hemprichii, Pipistrellus kuhlii (including P. kuhlii kuhlii and P. kuhlii deserti) and Vansonia rueppellii.				Asellia tridens,Rhinopoma cystops,R. microphyllum,Tadarida teniotis,Miniopterus schreibersii,Otonycteris hemprichii,Eptesicus isabellinus,Hypsugo savii,Pipistrellus kuhlii,Vansonia rueppellii	JAHA
Algeria & Oasis	Loumassine et al (2020)	Hibat Ellah Loumassine, Nadège Bonnot, Benjamin Allegrini, Mohammed Lamine Bendjeddou, Farid Bounaceur, Stéphane Aulagnier	2020	How arid environments affect spatial and temporal activity of bats	Journal of Arid Environments	180		104206	10.1016/j.jaridenv.2020.104206	Taghit	30.929210	-2.041420	Algeria	Zoology	determine the activity patterns and habitat use by bats in an arid environment in western Algeria (Bechar region).	In 2016, six sites were studied using acoustic bat detection.	A total of 10 species were reported: Asellia tridens, Rhinopoma cystops, R. microphyllum, Tadarida teniotis, Miniopterus schreibersii, Eptesicus isabellinus, Hypsugo savii, Otonycteris hemprichii, Pipistrellus kuhlii (including P. kuhlii kuhlii and P. kuhlii deserti) and Vansonia rueppellii.				Asellia tridens,Rhinopoma cystops,R. microphyllum,Tadarida teniotis,Miniopterus schreibersii,Otonycteris hemprichii,Eptesicus isabellinus,Hypsugo savii,Pipistrellus kuhlii,Vansonia rueppellii	JAHA
Algeria & Oasis	Matallah et al (2021)	Mohamed Elhadi Matallah, Djamel Alkama , Jacques Teller , Atef Ahriz, Shady Attia	2021	Quantification of the Outdoor Thermal Comfort within Different Oases Urban Fabrics	Sustainability	13		3051	10.3390/su13063051	Tolga	34.716667	5.383333	Algeria	Thermal research	The overarching aim is to quantify thermal comfort and guide landscape, and urban designers improve outdoor thermal comfort	The methodology relies on microclimatic measurements and weather datasets (TMY2, TMY3, TMYx), combining observations and numerical simulations. A total of 648 Physiological Equivalent Temperature (PET) values were calculated in three different urban fabrics in Tolga Oases Complex, Algeria. Between	Between 2003 and 2017, a remarkable microclimatic change was found, causing a high and accelerated heat stress level of 76%. The study results inform architects, urban planners and climatologists about climate change effects and urban sprawl impact on the oases lands. Moreover, urban strategies should seek mitigation and adaptation benefiting from the existing green infrastructure of palm groves.					JAHA
Algeria & Oasis	Medjani et al (2015)	Fethi Medjani, Oualid Hamdaoui, Mohamed Djidel, Danielle Ducrot	2015	Diachronic evolution of wetlands in a desert arid climate of the basin of Ouargla (southeastern Algeria) between 1987 and 2009 by remote sensing	Arabian Journal of Geosciences	8		10181-10192	10.1007/s12517-015-1958-5	Ouargla oasis	31.966667	5.333333	Algeria	Hidrology	follow the evolution of the humid surface state in order to map the changes and to identify the influencing factors	The study is based on the diachronic evolution of wetlands in the region of Ouargla between the years 1987, 2000, and 2009, with the statistical analysis and mapping changes obtained from satellite images Thematic Mapper (TM) and Enhanced Thematic Mapper Plus (ETM+) Landsat	The results have shown important changes on the occupation of the land in the region where we have observed a progress of vegetation, surfaces of polluted water because of anthropic factors, urban development, inadequate management of drinking water, and water of drainage.					JAHA
Algeria & Oasis	Medjani et al (2015)	Fethi Medjani, Oualid Hamdaoui, Mohamed Djidel, Danielle Ducrot	2015	Diachronic evolution of wetlands in a desert arid climate of the basin of Ouargla (southeastern Algeria) between 1987 and 2009 by remote sensing	Arabian Journal of Geosciences	8		10181-10192	10.1007/s12517-015-1958-5	N'Goussa	32.135004	5.303528	Algeria	Hidrology	follow the evolution of the humid surface state in order to map the changes and to identify the influencing factors	The study is based on the diachronic evolution of wetlands in the region of Ouargla between the years 1987, 2000, and 2009, with the statistical analysis and mapping changes obtained from satellite images Thematic Mapper (TM) and Enhanced Thematic Mapper Plus (ETM+) Landsat	The results have shown important changes on the occupation of the land in the region where we have observed a progress of vegetation, surfaces of polluted water because of anthropic factors, urban development, inadequate management of drinking water, and water of drainage.					JAHA
Algeria & Oasis	Medjani et al (2017)	Fethi Medjani, Belkacem Aissani, Sofiane Labar, Mohamed Djidel, Danielle Ducrot, Antoine Masse, C. Mei-Ling Hamilton	2017	Identifying saline wetlands in an arid desert climate using Landsat remote sensing imagery. Application on Ouargla Basin, southeastern Algeria	Arabian Journal of Geosciences	10	176	1-11	10.1007/s12517-017-2956-6	el Oued	33.353979	6.880949	Algeria	Remote sensing	choose the best classification method to identify saline wetlands by comparison between the different results of land use mapping within the Ouargla basin	Landsat ETM+ (2000) satellite imagery, using visual analysis with colored compositions, has identified various forms of saline wetlands in the Ouargla region desert environment in southeast Algeria	The results show that supervised classification is validated in the identification of Saharan saline wetlands, and that support vector machine (SVM) algorithm presents the best overall accuracy					JAHA
Algeria & Oasis	Medjani et al (2017)	Fethi Medjani, Belkacem Aissani, Sofiane Labar, Mohamed Djidel, Danielle Ducrot, Antoine Masse, C. Mei-Ling Hamilton	2017	Identifying saline wetlands in an arid desert climate using Landsat remote sensing imagery. Application on Ouargla Basin, southeastern Algeria	Arabian Journal of Geosciences	10	176	1-11	10.1007/s12517-017-2956-6	Biskra oasis	34.833333	5.750000	Algeria	Remote sensing	choose the best classification method to identify saline wetlands by comparison between the different results of land use mapping within the Ouargla basin	Landsat ETM+ (2000) satellite imagery, using visual analysis with colored compositions, has identified various forms of saline wetlands in the Ouargla region desert environment in southeast Algeria	The results show that supervised classification is validated in the identification of Saharan saline wetlands, and that support vector machine (SVM) algorithm presents the best overall accuracy					JAHA
Algeria & Oasis	Medjani et al (2017)	Fethi Medjani, Belkacem Aissani, Sofiane Labar, Mohamed Djidel, Danielle Ducrot, Antoine Masse, C. Mei-Ling Hamilton	2017	Identifying saline wetlands in an arid desert climate using Landsat remote sensing imagery. Application on Ouargla Basin, southeastern Algeria	Arabian Journal of Geosciences	10	176	1-11	10.1007/s12517-017-2956-6	Ghardaia	32.502160	3.642881	Algeria	Remote sensing	choose the best classification method to identify saline wetlands by comparison between the different results of land use mapping within the Ouargla basin	Landsat ETM+ (2000) satellite imagery, using visual analysis with colored compositions, has identified various forms of saline wetlands in the Ouargla region desert environment in southeast Algeria	The results show that supervised classification is validated in the identification of Saharan saline wetlands, and that support vector machine (SVM) algorithm presents the best overall accuracy					JAHA
Algeria & Oasis	Medjani et al (2017)	Fethi Medjani, Belkacem Aissani, Sofiane Labar, Mohamed Djidel, Danielle Ducrot, Antoine Masse, C. Mei-Ling Hamilton	2017	Identifying saline wetlands in an arid desert climate using Landsat remote sensing imagery. Application on Ouargla Basin, southeastern Algeria	Arabian Journal of Geosciences	10	176	1-11	10.1007/s12517-017-2956-6	Illizi	26.480059	8.477361	Algeria	Remote sensing	choose the best classification method to identify saline wetlands by comparison between the different results of land use mapping within the Ouargla basin	Landsat ETM+ (2000) satellite imagery, using visual analysis with colored compositions, has identified various forms of saline wetlands in the Ouargla region desert environment in southeast Algeria	The results show that supervised classification is validated in the identification of Saharan saline wetlands, and that support vector machine (SVM) algorithm presents the best overall accuracy					JAHA
Algeria & Oasis	Medjani et al (2017)	Fethi Medjani, Belkacem Aissani, Sofiane Labar, Mohamed Djidel, Danielle Ducrot, Antoine Masse, C. Mei-Ling Hamilton	2017	Identifying saline wetlands in an arid desert climate using Landsat remote sensing imagery. Application on Ouargla Basin, southeastern Algeria	Arabian Journal of Geosciences	10	176	1-11	10.1007/s12517-017-2956-6	Tamanrasset	22.782985	5.531405	Algeria	Remote sensing	choose the best classification method to identify saline wetlands by comparison between the different results of land use mapping within the Ouargla basin	Landsat ETM+ (2000) satellite imagery, using visual analysis with colored compositions, has identified various forms of saline wetlands in the Ouargla region desert environment in southeast Algeria	The results show that supervised classification is validated in the identification of Saharan saline wetlands, and that support vector machine (SVM) algorithm presents the best overall accuracy					JAHA
Algeria & Oasis	Mehda et al (2021)	Smail Mehda,M.Angeles Muñoz-Martín, Mabrouka Oustani, Baelhadj Hamdi-Aïssa,Elvira Perona, Pilar Mateo	2021	Lithic cyanobacterial communities in the polyextreme Sahara Desert: implications for the search for the limits of life	Enviromental Microbiology				10.1111/1462-2920.15850	Sidi Khouiled	31.976814	5.412719	Algeria	Diversity	presents extreme and persistent dry conditions with a limited number of hours during which the moisture availability, temperature and light allow phototrophic growth. Some cyanobacteria can live in these hostile conditions	Diversity census	the results of this study reveal the high diversity of and variability in cyanobacteria among the sampled habitats in the Sahara Desert				Nostoc commune,Trichocoleus sociatus,Microcoleus steenstrupii,Pseudophormidium sp,Trichocoleus desertorum,Pseudoacaryochloris sahariense,Nodosilinea sp	JAHA
Algeria & Oasis	Melouah et al (2002)	Oualid Melouah, Hichem Zerrouki, Romina Lucrecia Lopez Steinmetz	2020	Characterization of processes and mechanisms controlling ground water salinization in the Algerian Sahara	Arabian Journal of Geosciences	13	927	1-31	10.1007/s12517-020-05903-9	Guerrera	32.781166	4.497288	Algeria	Hidrology	determine the probable causes of ground water deterioration,	54 water samples were collected from pumping wells and were analyzed in order to characterize their major ion hydrochemistry and to compute indexes on water quality. Additionally, geophysical investigations involved electric resistivity surveys that were applied to investigate the aquifer substrate.	Data revealed presence of water at 2m in depth with the presence of, at least, four salt layers that are characterized by very low resistivity values					JAHA
Algeria & Oasis	Mihi et al (2019)	Ali Mihia, Nacer Tarai, Haroun Chenchouni	2019	Can palm date plantations and oasification be used as a proxy to fight sustainably against desertification and sand encroachment in hot drylands?	Ecological Indicators	105		365-375	10.1016/j.ecolind.2017.11.027	Doucen	34.617838	5.097116	Algeria	Remote sensing	the current dissertation shows the impact of agricultural mutation in drylands and highlights the effect of date palm (Phoenix dactylifera) plantations (DPP) on desertification phenomenon in oases of the Algerian Sahara Desert.	The spatiotemporal survey was conducted using three Landsat satellite images (TM-1984, ETM+-1999, and OLI-2013). Likelihood supervised classification was used to quantify DPP change over three decades, whereas four remote sensed indices were extracted as indicators of desertification process in the study area: Normalized Difference Vegetation Index (NDVI), Normalized Difference Moisture Index (ND…	DPP area and tree numbers quadrupled over the last three decades with a surface increase of 4822 ha and more than 0.5 million trees. DPP presence positively influenced NDVI, NDMI and CI, but negatively affected SI-T. Highly significant positive relationships were found between NDVI—DPP, NDVI—NDMI, and NDVI—CI, although negative relationships were obtained between SI-T—NDVI and SI-T—NDMI.		Hammada scoparia (Pomel) Iljin,Nitrosalsola vermiculata,Theodorova,Suaeda spp.,Tamarix spp.,Lygeum spartum,Loefl. ex L.	groundwater		JAHA
Algeria & Oasis	Moussi et al (2011)	Abdelhamid Moussi, Abderrahmane Abba, Abboud Harrat , Daniel Petit	2011	Desert acridian fauna (Orthoptera, Acridomorpha): Comparison between steppic and oasian habitats in Algeria	Comptes Rendus Biologies	334		158-167	10.1016/j.crvi.2010.12.001	Mekhadma	34.645139	5.489587	Algeria	Diversity	Diversity differences between oasis and stepes	Throughmonthly samplings of grasshoppers takenfromfivesites in oases and twoin steppes in the areaof Biskra	45speciescouldberecorded.Fourassemblages of species canbedefined, two in the oasian zones, one in the stony steppe and a last one in the sandy steppe	Phoenix dactylifera ,Atriplex halimus, Cynodon dactylon	Phoenix dactylifera,Atriplex halimus,Cynodon dactylon		Mioscirtus wagneri,Heteracris annulosa,Dericorys millierei,Heteracris harterti,Calliptamus barbarus,Sphingonotus rubescens,Heteracris adspersa,Hilethera aeolopoides,Sphingonotus lucasi,Pamphagulus bodenheimeri dumonti,Sphingoderus carinatus,Ochrilidia gracilis,Duroniella lucasi,Aiolopus thalassinus,Acrotylus patruelis,Eyprepocnemis plorans,Acrida turrita,Tropidopola cylindrica,Anacridium aegyptiu…	JAHA
Algeria & Oasis	Nacer & Amel (2013)	T Nacer, C Amel	2013	Ethnobotanical studies of medicinal plants at Biskra Oasis (southern Algeria)	Planta Med	79		PE19	10.1055/s-0033-1352038	Biskra oasis	34.833333	5.750000	Algeria	Etnobotanic	An ethnobotanical study was conducted at four localities in the region of Biskra, populated by two ethnic groups, Chaouia and Sehari.	This survey, conducted in February-March and September-October 2012	identified 64 medicinal plants used in traditional medicine by local people, including 34 collected at Ain Zaatout mainly in the mountains of Aures.		Agrimonia eupatoria intermedia,Agropyrum repens,Ajuga ìva,Alchemilla arvensis,Alnus glutinosa,Althaea oficinalis,Ammi majus,Ammi visnaga,Artemisia campestris,Artemisia herba-alba,Artemisia vulgaris,Asparagus oficinalis,Asteriscus pygmaeus,Astragabs armafus,Astragalus caprinus,Ballota hirsuta,Bellis annua,Borago oficinalis,Brassica nigra,Calendula arvensis,Calmintha ofsicinulis,Capparis spinosa,Ca…			JAHA
Algeria & Oasis	Nouijdem & Mimeche (2021)	Yassine Nouidjem, Fateh Mimeche	2021	First observation of the breeding of common shelduck, Tadorna tadorna, in Algerian Saharan streams	River Research and Applications	37		796-798	10.1002/rra.3790	Sidi Mhamed Moussa	34.554349	6.098982	Algeria	Ornitology	Describe the breeding observation of Tadorna radorna	Observation	The breeding of common shelduck, Tadorna tadorna, is reported for the first time in the Ziban oasis in the north east of Algerian Sahara					JAHA
Algeria & Oasis	Oumata et al (2020)	Sabrina Oumata ,Jacques David ,Leila Mekliche-Hanifi ,Mohamed Kharsi ,Maria Zaharieva ,Philippe Monneveux	2020	Oasis wheats of the South of Algeria: landraces, cultural practices and utilization	Genetic Resources and Crop Evolution	67		325-337	10.1007/s10722-019-00874-	Metarfa	28.593725	-0.153803	Algeria	Agronomy	risks of genetic erosion have been reported, related to the degradation of the oases cropping systems and the introduction of modern wheat varieties	A better description and characterization of the Saharan wheat landraces is therefore required to make more effective their utilization in breeding. The present study was conducted among fourteen oases distributed in three locations of South Algeria (Adrar, Tamanrasset and Tindouf).	Three durum and 38 bread wheat landraces were identified. Most of them appeared to be specific to locations or oases. Forms that differed on spike or grain characteristics were described, and botanical varieties were identified within most landraces	wheat				JAHA
Algeria & Oasis	Oumata et al (2020)	Sabrina Oumata ,Jacques David ,Leila Mekliche-Hanifi ,Mohamed Kharsi ,Maria Zaharieva ,Philippe Monneveux	2020	Oasis wheats of the South of Algeria: landraces, cultural practices and utilization	Genetic Resources and Crop Evolution	67		325-337	10.1007/s10722-019-00874-	Timimoun	29.269092	0.223690	Algeria	Agronomy	risks of genetic erosion have been reported, related to the degradation of the oases cropping systems and the introduction of modern wheat varieties	A better description and characterization of the Saharan wheat landraces is therefore required to make more effective their utilization in breeding. The present study was conducted among fourteen oases distributed in three locations of South Algeria (Adrar, Tamanrasset and Tindouf).	Three durum and 38 bread wheat landraces were identified. Most of them appeared to be specific to locations or oases. Forms that differed on spike or grain characteristics were described, and botanical varieties were identified within most landraces	wheat				JAHA
Algeria & Oasis	Oumata et al (2020)	Sabrina Oumata ,Jacques David ,Leila Mekliche-Hanifi ,Mohamed Kharsi ,Maria Zaharieva ,Philippe Monneveux	2020	Oasis wheats of the South of Algeria: landraces, cultural practices and utilization	Genetic Resources and Crop Evolution	67		325-337	10.1007/s10722-019-00874-	Daldoul	34.083635	3.301198	Algeria	Agronomy	risks of genetic erosion have been reported, related to the degradation of the oases cropping systems and the introduction of modern wheat varieties	A better description and characterization of the Saharan wheat landraces is therefore required to make more effective their utilization in breeding. The present study was conducted among fourteen oases distributed in three locations of South Algeria (Adrar, Tamanrasset and Tindouf).	Three durum and 38 bread wheat landraces were identified. Most of them appeared to be specific to locations or oases. Forms that differed on spike or grain characteristics were described, and botanical varieties were identified within most landraces	wheat				JAHA
Algeria & Oasis	Oumata et al (2020)	Sabrina Oumata ,Jacques David ,Leila Mekliche-Hanifi ,Mohamed Kharsi ,Maria Zaharieva ,Philippe Monneveux	2020	Oasis wheats of the South of Algeria: landraces, cultural practices and utilization	Genetic Resources and Crop Evolution	67		325-337	10.1007/s10722-019-00874-	Adrar	27.863963	-0.302499	Algeria	Agronomy	risks of genetic erosion have been reported, related to the degradation of the oases cropping systems and the introduction of modern wheat varieties	A better description and characterization of the Saharan wheat landraces is therefore required to make more effective their utilization in breeding. The present study was conducted among fourteen oases distributed in three locations of South Algeria (Adrar, Tamanrasset and Tindouf).	Three durum and 38 bread wheat landraces were identified. Most of them appeared to be specific to locations or oases. Forms that differed on spike or grain characteristics were described, and botanical varieties were identified within most landraces	wheat				JAHA
Algeria & Oasis	Oumata et al (2020)	Sabrina Oumata ,Jacques David ,Leila Mekliche-Hanifi ,Mohamed Kharsi ,Maria Zaharieva ,Philippe Monneveux	2020	Oasis wheats of the South of Algeria: landraces, cultural practices and utilization	Genetic Resources and Crop Evolution	67		325-337	10.1007/s10722-019-00874-	Bouda	28.004732	-0.433780	Algeria	Agronomy	risks of genetic erosion have been reported, related to the degradation of the oases cropping systems and the introduction of modern wheat varieties	A better description and characterization of the Saharan wheat landraces is therefore required to make more effective their utilization in breeding. The present study was conducted among fourteen oases distributed in three locations of South Algeria (Adrar, Tamanrasset and Tindouf).	Three durum and 38 bread wheat landraces were identified. Most of them appeared to be specific to locations or oases. Forms that differed on spike or grain characteristics were described, and botanical varieties were identified within most landraces	wheat				JAHA
Algeria & Oasis	Oumata et al (2020)	Sabrina Oumata ,Jacques David ,Leila Mekliche-Hanifi ,Mohamed Kharsi ,Maria Zaharieva ,Philippe Monneveux	2020	Oasis wheats of the South of Algeria: landraces, cultural practices and utilization	Genetic Resources and Crop Evolution	67		325-337	10.1007/s10722-019-00874-	Tamantit	27.716981	-0.276960	Algeria	Agronomy	risks of genetic erosion have been reported, related to the degradation of the oases cropping systems and the introduction of modern wheat varieties	A better description and characterization of the Saharan wheat landraces is therefore required to make more effective their utilization in breeding. The present study was conducted among fourteen oases distributed in three locations of South Algeria (Adrar, Tamanrasset and Tindouf).	Three durum and 38 bread wheat landraces were identified. Most of them appeared to be specific to locations or oases. Forms that differed on spike or grain characteristics were described, and botanical varieties were identified within most landraces	wheat				JAHA
Algeria & Oasis	Oumata et al (2020)	Sabrina Oumata ,Jacques David ,Leila Mekliche-Hanifi ,Mohamed Kharsi ,Maria Zaharieva ,Philippe Monneveux	2020	Oasis wheats of the South of Algeria: landraces, cultural practices and utilization	Genetic Resources and Crop Evolution	67		325-337	10.1007/s10722-019-00874-	Timmi	27.766916	-0.260203	Algeria	Agronomy	risks of genetic erosion have been reported, related to the degradation of the oases cropping systems and the introduction of modern wheat varieties	A better description and characterization of the Saharan wheat landraces is therefore required to make more effective their utilization in breeding. The present study was conducted among fourteen oases distributed in three locations of South Algeria (Adrar, Tamanrasset and Tindouf).	Three durum and 38 bread wheat landraces were identified. Most of them appeared to be specific to locations or oases. Forms that differed on spike or grain characteristics were described, and botanical varieties were identified within most landraces	wheat				JAHA
Algeria & Oasis	Oumata et al (2020)	Sabrina Oumata ,Jacques David ,Leila Mekliche-Hanifi ,Mohamed Kharsi ,Maria Zaharieva ,Philippe Monneveux	2020	Oasis wheats of the South of Algeria: landraces, cultural practices and utilization	Genetic Resources and Crop Evolution	67		325-337	10.1007/s10722-019-00874-	Tsabit	28.349650	-0.227575	Algeria	Agronomy	risks of genetic erosion have been reported, related to the degradation of the oases cropping systems and the introduction of modern wheat varieties	A better description and characterization of the Saharan wheat landraces is therefore required to make more effective their utilization in breeding. The present study was conducted among fourteen oases distributed in three locations of South Algeria (Adrar, Tamanrasset and Tindouf).	Three durum and 38 bread wheat landraces were identified. Most of them appeared to be specific to locations or oases. Forms that differed on spike or grain characteristics were described, and botanical varieties were identified within most landraces	wheat				JAHA
Algeria & Oasis	Oumata et al (2020)	Sabrina Oumata ,Jacques David ,Leila Mekliche-Hanifi ,Mohamed Kharsi ,Maria Zaharieva ,Philippe Monneveux	2020	Oasis wheats of the South of Algeria: landraces, cultural practices and utilization	Genetic Resources and Crop Evolution	67		325-337	10.1007/s10722-019-00874-	Ideles	23.819778	5.931547	Algeria	Agronomy	risks of genetic erosion have been reported, related to the degradation of the oases cropping systems and the introduction of modern wheat varieties	A better description and characterization of the Saharan wheat landraces is therefore required to make more effective their utilization in breeding. The present study was conducted among fourteen oases distributed in three locations of South Algeria (Adrar, Tamanrasset and Tindouf).	Three durum and 38 bread wheat landraces were identified. Most of them appeared to be specific to locations or oases. Forms that differed on spike or grain characteristics were described, and botanical varieties were identified within most landraces	wheat				JAHA
Algeria & Oasis	Oumata et al (2020)	Sabrina Oumata ,Jacques David ,Leila Mekliche-Hanifi ,Mohamed Kharsi ,Maria Zaharieva ,Philippe Monneveux	2020	Oasis wheats of the South of Algeria: landraces, cultural practices and utilization	Genetic Resources and Crop Evolution	67		325-337	10.1007/s10722-019-00874-	Tamanrasset	22.782985	5.531405	Algeria	Agronomy	risks of genetic erosion have been reported, related to the degradation of the oases cropping systems and the introduction of modern wheat varieties	A better description and characterization of the Saharan wheat landraces is therefore required to make more effective their utilization in breeding. The present study was conducted among fourteen oases distributed in three locations of South Algeria (Adrar, Tamanrasset and Tindouf).	Three durum and 38 bread wheat landraces were identified. Most of them appeared to be specific to locations or oases. Forms that differed on spike or grain characteristics were described, and botanical varieties were identified within most landraces	wheat				JAHA
Algeria & Oasis	Oumata et al (2020)	Sabrina Oumata ,Jacques David ,Leila Mekliche-Hanifi ,Mohamed Kharsi ,Maria Zaharieva ,Philippe Monneveux	2020	Oasis wheats of the South of Algeria: landraces, cultural practices and utilization	Genetic Resources and Crop Evolution	67		325-337	10.1007/s10722-019-00874-	Abalessa	22.888965	4.851074	Algeria	Agronomy	risks of genetic erosion have been reported, related to the degradation of the oases cropping systems and the introduction of modern wheat varieties	A better description and characterization of the Saharan wheat landraces is therefore required to make more effective their utilization in breeding. The present study was conducted among fourteen oases distributed in three locations of South Algeria (Adrar, Tamanrasset and Tindouf).	Three durum and 38 bread wheat landraces were identified. Most of them appeared to be specific to locations or oases. Forms that differed on spike or grain characteristics were described, and botanical varieties were identified within most landraces	wheat				JAHA
Algeria & Oasis	Panaud et al (2002)	Olivier Panaud, Anissa Chaib, Aboubakry Sarr	2002	Dynamic conservation of apricot Prunus armeniaca in saharian oases: use of AFLP markers to assess genetic diversity in traditional orchards	Euphytica	128		301-305	10.1023/A:1021247725148	El Golea	30.575367	2.891121	Algeria	Agronomy	The genetic diversity of a traditional apricot (Prunus armeniaca) orchard in the Saharian oasis of El Golea	using AFLP markers	A total of 197 bands were amplified, among which 97 revealed polymorphism.	Traditional apricot (Prunus armeniaca)	Prunus americana			JAHA
Algeria & Oasis	Remini et al (2011)	Boualem Remini , Bachir Achour , Jean Albergel	2011	Timimoun’s foggara (Algeria): an heritage in danger	Arabian Journal of Geosciences	4		495-506	10.1007/s12517-010-0139-9	Timimoun	29.265622	0.222565	Algeria	Hidrology	Risk of the foggaras	Surveys	socio-economic problems (Heritage and depopulation) are common to both types of foggara (foggara of the Erg and foggara Albian).					JAHA
Algeria & Oasis	Remini et al (2011)	Boualem Remini , Bachir Achour , Jean Albergel	2011	Timimoun’s foggara (Algeria): an heritage in danger	Arabian Journal of Geosciences	4		495-506	10.1007/s12517-010-0139-9	Biskra oasis	34.833333	5.750000	Algeria	Agronomy	understand the structure of date palm diversity from the coastal area to a very isolated desert location	We used 18 microsatellite markers and a chloroplast minisatellite to characterize 414 individual palm trees corresponding to 114 named varieties	We found a significant negative inbreeding coefficient, suggesting active farmer selection for heterozygous individuals. Three distinct genetic clusters were identified, a ubiquitous set of varieties found across the different oases, and two clusters, one of which was specific to the northern area, and the other to the drier southern area of the Algerian Sahara	Date palm	Phoenix dactylifera			JAHA
Algeria & Oasis	Remini et al (2011)	Boualem Remini , Bachir Achour , Jean Albergel	2011	Timimoun’s foggara (Algeria): an heritage in danger	Arabian Journal of Geosciences	4		495-506	10.1007/s12517-010-0139-9	Oued Souf oasis	33.365293	6.854822	Algeria	Agronomy	understand the structure of date palm diversity from the coastal area to a very isolated desert location	We used 18 microsatellite markers and a chloroplast minisatellite to characterize 414 individual palm trees corresponding to 114 named varieties	We found a significant negative inbreeding coefficient, suggesting active farmer selection for heterozygous individuals. Three distinct genetic clusters were identified, a ubiquitous set of varieties found across the different oases, and two clusters, one of which was specific to the northern area, and the other to the drier southern area of the Algerian Sahara	Date palm	Phoenix dactylifera			JAHA
Algeria & Oasis	Remini et al (2011)	Boualem Remini , Bachir Achour , Jean Albergel	2011	Timimoun’s foggara (Algeria): an heritage in danger	Arabian Journal of Geosciences	4		495-506	10.1007/s12517-010-0139-9	Touggourt	33.114837	6.091385	Algeria	Agronomy	understand the structure of date palm diversity from the coastal area to a very isolated desert location	We used 18 microsatellite markers and a chloroplast minisatellite to characterize 414 individual palm trees corresponding to 114 named varieties	We found a significant negative inbreeding coefficient, suggesting active farmer selection for heterozygous individuals. Three distinct genetic clusters were identified, a ubiquitous set of varieties found across the different oases, and two clusters, one of which was specific to the northern area, and the other to the drier southern area of the Algerian Sahara	Date palm	Phoenix dactylifera			JAHA
Algeria & Oasis	Remini et al (2011)	Boualem Remini , Bachir Achour , Jean Albergel	2011	Timimoun’s foggara (Algeria): an heritage in danger	Arabian Journal of Geosciences	4		495-506	10.1007/s12517-010-0139-9	Ourlaga	31.949090	5.300479	Algeria	Agronomy	understand the structure of date palm diversity from the coastal area to a very isolated desert location	We used 18 microsatellite markers and a chloroplast minisatellite to characterize 414 individual palm trees corresponding to 114 named varieties	We found a significant negative inbreeding coefficient, suggesting active farmer selection for heterozygous individuals. Three distinct genetic clusters were identified, a ubiquitous set of varieties found across the different oases, and two clusters, one of which was specific to the northern area, and the other to the drier southern area of the Algerian Sahara	Date palm	Phoenix dactylifera			JAHA
Algeria & Oasis	Remini et al (2011)	Boualem Remini , Bachir Achour , Jean Albergel	2011	Timimoun’s foggara (Algeria): an heritage in danger	Arabian Journal of Geosciences	4		495-506	10.1007/s12517-010-0139-9	Ghardaia	32.502160	3.642881	Algeria	Agronomy	understand the structure of date palm diversity from the coastal area to a very isolated desert location	We used 18 microsatellite markers and a chloroplast minisatellite to characterize 414 individual palm trees corresponding to 114 named varieties	We found a significant negative inbreeding coefficient, suggesting active farmer selection for heterozygous individuals. Three distinct genetic clusters were identified, a ubiquitous set of varieties found across the different oases, and two clusters, one of which was specific to the northern area, and the other to the drier southern area of the Algerian Sahara	Date palm	Phoenix dactylifera			JAHA
Algeria & Oasis	Remini et al (2011)	Boualem Remini , Bachir Achour , Jean Albergel	2011	Timimoun’s foggara (Algeria): an heritage in danger	Arabian Journal of Geosciences	4		495-506	10.1007/s12517-010-0139-9	El Menia	30.569519	2.891595	Algeria	Agronomy	understand the structure of date palm diversity from the coastal area to a very isolated desert location	We used 18 microsatellite markers and a chloroplast minisatellite to characterize 414 individual palm trees corresponding to 114 named varieties	We found a significant negative inbreeding coefficient, suggesting active farmer selection for heterozygous individuals. Three distinct genetic clusters were identified, a ubiquitous set of varieties found across the different oases, and two clusters, one of which was specific to the northern area, and the other to the drier southern area of the Algerian Sahara	Date palm	Phoenix dactylifera			JAHA
Algeria & Oasis	Remini et al (2011)	Boualem Remini , Bachir Achour , Jean Albergel	2011	Timimoun’s foggara (Algeria): an heritage in danger	Arabian Journal of Geosciences	4		495-506	10.1007/s12517-010-0139-9	Timimoun	29.265622	0.222565	Algeria	Agronomy	understand the structure of date palm diversity from the coastal area to a very isolated desert location	We used 18 microsatellite markers and a chloroplast minisatellite to characterize 414 individual palm trees corresponding to 114 named varieties	We found a significant negative inbreeding coefficient, suggesting active farmer selection for heterozygous individuals. Three distinct genetic clusters were identified, a ubiquitous set of varieties found across the different oases, and two clusters, one of which was specific to the northern area, and the other to the drier southern area of the Algerian Sahara	Date palm	Phoenix dactylifera			JAHA
Algeria & Oasis	Remini et al (2011)	Boualem Remini , Bachir Achour , Jean Albergel	2011	Timimoun’s foggara (Algeria): an heritage in danger	Arabian Journal of Geosciences	4		495-506	10.1007/s12517-010-0139-9	Adrar	27.863963	-0.302499	Algeria	Agronomy	understand the structure of date palm diversity from the coastal area to a very isolated desert location	We used 18 microsatellite markers and a chloroplast minisatellite to characterize 414 individual palm trees corresponding to 114 named varieties	We found a significant negative inbreeding coefficient, suggesting active farmer selection for heterozygous individuals. Three distinct genetic clusters were identified, a ubiquitous set of varieties found across the different oases, and two clusters, one of which was specific to the northern area, and the other to the drier southern area of the Algerian Sahara	Date palm	Phoenix dactylifera			JAHA
Algeria & Oasis	Remini et al (2011)	Boualem Remini , Bachir Achour , Jean Albergel	2011	Timimoun’s foggara (Algeria): an heritage in danger	Arabian Journal of Geosciences	4		495-506	10.1007/s12517-010-0139-9	Beni-abbes	30.124229	-2.171951	Algeria	Agronomy	understand the structure of date palm diversity from the coastal area to a very isolated desert location	We used 18 microsatellite markers and a chloroplast minisatellite to characterize 414 individual palm trees corresponding to 114 named varieties	We found a significant negative inbreeding coefficient, suggesting active farmer selection for heterozygous individuals. Three distinct genetic clusters were identified, a ubiquitous set of varieties found across the different oases, and two clusters, one of which was specific to the northern area, and the other to the drier southern area of the Algerian Sahara	Date palm	Phoenix dactylifera			JAHA
Algeria & Oasis	Remini et al (2011)	Boualem Remini , Bachir Achour , Jean Albergel	2011	Timimoun’s foggara (Algeria): an heritage in danger	Arabian Journal of Geosciences	4		495-506	10.1007/s12517-010-0139-9	Tamanrasset	22.782985	5.531405	Algeria	Agronomy	understand the structure of date palm diversity from the coastal area to a very isolated desert location	We used 18 microsatellite markers and a chloroplast minisatellite to characterize 414 individual palm trees corresponding to 114 named varieties	We found a significant negative inbreeding coefficient, suggesting active farmer selection for heterozygous individuals. Three distinct genetic clusters were identified, a ubiquitous set of varieties found across the different oases, and two clusters, one of which was specific to the northern area, and the other to the drier southern area of the Algerian Sahara	Date palm	Phoenix dactylifera			JAHA
Algeria & Oasis	Rohouma et al (2021)	Abdelhak Rhouma, Imen Mougou, Hanane Bedjaoui, Hamza Rhouma, Abdulnabi Abbdul Ameer Matrood	2021	Ecology in Chott Sidi Abdel Salam oasis, southeastern Tunisia: cultivated vegetation, fungal diversity and livestock population	Journal of Coastal Conservation	25	52	1-17	10.1007/s11852-021-00837-0	Gabes	33.879179	10.076072	Tunisia	Diversity	effectively manage and protect the biodiversity of this coastal oasis	the cultivated vegetable, fungal and livestock diversity were investigated using ecological indicators	Our results indicated that the agricultural system in this oasis is traditionally organized into three vegetation layers: palm trees, fruit trees and herbaceous plants. 41 vegetable species, representing 18 families and 32 genera, have been recorded.	Phoenix dactylifera, Punica granatum, Olea europaea, Vitis vinifera, Ficus carica, Prunus amygdalus, Malus domestica, Prunus armeniaca, Prunus persica, Citrus limon, Citrus aurantium, Citrus clementina, Citrus sinensis, Musa acuminata, Citrullus lanatus, Cucumis melo, Cucurbita pepo, Cucumis sativus, Allium cepa, Allium sativum, Allium ampeloprasum, Daucus carota, Apium graveolens, Cuminum cyminu…	Phoenix dactylifera,Punica granatum,Olea europaea,Vitis vinifera,Ficus carica,Prunus amygdalus,Malus domestica,Prunus armeniaca,Prunus persica,Citrus limon,Citrus aurantium,Citrus clementina,Citrus sinensis,Musa acuminata,Citrullus lanatus,Cucumis melo,Cucurbita pepo,Cucumis sativus,Allium cepa,Allium sativum,Allium ampeloprasum,Daucus carota,Apium graveolens,Cuminum cyminum,Coriandrum sativum,Fo…		Alternaria spp.,Aspergillus niger,Taphrina deformans,Pythium spp.,Botrytis cinerea,Alternaria spp.,Podosphaera pannosa,Monilia spp..,Venturia inaequalis,Penicillium spp.,Fusicladium oleagineum,Aspergillus spp.,Plasmopara viticola,Tranzschelia pruni-spinosae,Erysiphe necator,Cladosporium spp.,Erysiphe pisi,Leveillula taurica,Ascochyta rabiei,Sclerotinia spp.,Uromyces fabae,Fusarium spp,Phytophthor…	JAHA
Algeria & Oasis	Shaibi et al (2009)	Taher Shaibi, Stefan Fuchs, Robin F.A. Moritz	2009	Morphological study of Honeybees (Apis mellifera) from Libya	Apidologie	40		97-105	10.1051/apido/2008068	Kufra	24.189204	23.337465	Libya	Entomology	Diversity of Apis melifera	with classical morphometrical analyses	Libyan honeybees sampled at coastal and desert locations are distinctly different from both the adjacent A. m. intermissa bee populations of Tunisia and Algeria and those of A. m. lamarckii of Egypt	Apis melifera			Apis mellifera	JAHA
Algeria & Oasis	Soudani & Moussi (2020)	Abderrahmane Soudani, Abdelhamid Moussi	2020	Updated checklist and assemblages of grasshoppers (Orthoptera: Acridomorpha) associated with various habitats, including oases of Central Sahara in Algeria	African Zoology			1-11	10.1080/15627020.2020.1773310	Aoulef	26.964488	1.071565	Algeria	Diversity	The grasshopper communities of central Saharan ecosystems (Adrar region, Algeria) were studied at two scales: the first scale considered different biotopes in 23 localities.	Random sampling with different traps from February 2016 to February 2019	two families comprising 20 species, of which 13 are recorded for the first time in the region. The second scale concerned the desert oases. Monthly sampling from March 2017 to November 2018 captured 11 species belonging to two families and four different subfamilies				Acrotylus insubricus,Acrotylus longipes,Aiolopus simulatrix,Aiolopus thalassinus,Hyalorrhipis canescens,Locusta migratoria,Morphacris fasciata,Sphingonotus obscuratus lameerei,Sphingonutus octofasciatus,Sphingonutus rubescens,Sphingonutus savignyi,Oedaleus senegalensis,Heteracris harterti,Heteracris adspersa,Truxalis nasuta,Schistocerca gregaria,Calliptamus barbarus,Ochrilidia filicornis,Poekiloc…	JAHA
Algeria & Oasis	Soudani & Moussi (2020)	Abderrahmane Soudani, Abdelhamid Moussi	2020	Updated checklist and assemblages of grasshoppers (Orthoptera: Acridomorpha) associated with various habitats, including oases of Central Sahara in Algeria	African Zoology			1-11	10.1080/15627020.2020.1773310	Sali	27.035028	-0.092500	Algeria	Diversity	The grasshopper communities of central Saharan ecosystems (Adrar region, Algeria) were studied at two scales: the first scale considered different biotopes in 23 localities.	Random sampling with different traps from February 2016 to February 2020	two families comprising 20 species, of which 13 are recorded for the first time in the region. The second scale concerned the desert oases. Monthly sampling from March 2017 to November 2018 captured 11 species belonging to two families and four different subfamilies				Acrotylus insubricus,Acrotylus longipes,Aiolopus simulatrix,Aiolopus thalassinus,Hyalorrhipis canescens,Locusta migratoria,Morphacris fasciata,Sphingonotus obscuratus lameerei,Sphingonutus octofasciatus,Sphingonutus rubescens,Sphingonutus savignyi,Oedaleus senegalensis,Heteracris harterti,Heteracris adspersa,Truxalis nasuta,Schistocerca gregaria,Calliptamus barbarus,Ochrilidia filicornis,Poekiloc…	JAHA
Algeria & Oasis	Soudani & Moussi (2020)	Abderrahmane Soudani, Abdelhamid Moussi	2020	Updated checklist and assemblages of grasshoppers (Orthoptera: Acridomorpha) associated with various habitats, including oases of Central Sahara in Algeria	African Zoology			1-11	10.1080/15627020.2020.1773310	Zaouiet Kounta	27.304497	-0.227690	Algeria	Diversity	The grasshopper communities of central Saharan ecosystems (Adrar region, Algeria) were studied at two scales: the first scale considered different biotopes in 23 localities.	Random sampling with different traps from February 2016 to February 2021	two families comprising 20 species, of which 13 are recorded for the first time in the region. The second scale concerned the desert oases. Monthly sampling from March 2017 to November 2018 captured 11 species belonging to two families and four different subfamilies				Acrotylus insubricus,Acrotylus longipes,Aiolopus simulatrix,Aiolopus thalassinus,Hyalorrhipis canescens,Locusta migratoria,Morphacris fasciata,Sphingonotus obscuratus lameerei,Sphingonutus octofasciatus,Sphingonutus rubescens,Sphingonutus savignyi,Oedaleus senegalensis,Heteracris harterti,Heteracris adspersa,Truxalis nasuta,Schistocerca gregaria,Calliptamus barbarus,Ochrilidia filicornis,Poekiloc…	JAHA
Algeria & Oasis	Soudani & Moussi (2020)	Abderrahmane Soudani, Abdelhamid Moussi	2020	Updated checklist and assemblages of grasshoppers (Orthoptera: Acridomorpha) associated with various habitats, including oases of Central Sahara in Algeria	African Zoology			1-11	10.1080/15627020.2020.1773310	Fenoughil	27.600972	-0.309639	Algeria	Diversity	The grasshopper communities of central Saharan ecosystems (Adrar region, Algeria) were studied at two scales: the first scale considered different biotopes in 23 localities.	Random sampling with different traps from February 2016 to February 2022	two families comprising 20 species, of which 13 are recorded for the first time in the region. The second scale concerned the desert oases. Monthly sampling from March 2017 to November 2018 captured 11 species belonging to two families and four different subfamilies				Acrotylus insubricus,Acrotylus longipes,Aiolopus simulatrix,Aiolopus thalassinus,Hyalorrhipis canescens,Locusta migratoria,Morphacris fasciata,Sphingonotus obscuratus lameerei,Sphingonutus octofasciatus,Sphingonutus rubescens,Sphingonutus savignyi,Oedaleus senegalensis,Heteracris harterti,Heteracris adspersa,Truxalis nasuta,Schistocerca gregaria,Calliptamus barbarus,Ochrilidia filicornis,Poekiloc…	JAHA
Algeria & Oasis	Soudani & Moussi (2020)	Abderrahmane Soudani, Abdelhamid Moussi	2020	Updated checklist and assemblages of grasshoppers (Orthoptera: Acridomorpha) associated with various habitats, including oases of Central Sahara in Algeria	African Zoology			1-11	10.1080/15627020.2020.1773310	Timmi	27.766916	-0.260203	Algeria	Diversity	The grasshopper communities of central Saharan ecosystems (Adrar region, Algeria) were studied at two scales: the first scale considered different biotopes in 23 localities.	Random sampling with different traps from February 2016 to February 2023	two families comprising 20 species, of which 13 are recorded for the first time in the region. The second scale concerned the desert oases. Monthly sampling from March 2017 to November 2018 captured 11 species belonging to two families and four different subfamilies				Acrotylus insubricus,Acrotylus longipes,Aiolopus simulatrix,Aiolopus thalassinus,Hyalorrhipis canescens,Locusta migratoria,Morphacris fasciata,Sphingonotus obscuratus lameerei,Sphingonutus octofasciatus,Sphingonutus rubescens,Sphingonutus savignyi,Oedaleus senegalensis,Heteracris harterti,Heteracris adspersa,Truxalis nasuta,Schistocerca gregaria,Calliptamus barbarus,Ochrilidia filicornis,Poekiloc…	JAHA
Algeria & Oasis	Soudani & Moussi (2020)	Abderrahmane Soudani, Abdelhamid Moussi	2020	Updated checklist and assemblages of grasshoppers (Orthoptera: Acridomorpha) associated with various habitats, including oases of Central Sahara in Algeria	African Zoology			1-11	10.1080/15627020.2020.1773310	Ouled Ahmed Tammi	27.859014	-0.302480	Algeria	Diversity	The grasshopper communities of central Saharan ecosystems (Adrar region, Algeria) were studied at two scales: the first scale considered different biotopes in 23 localities.	Random sampling with different traps from February 2016 to February 2024	two families comprising 20 species, of which 13 are recorded for the first time in the region. The second scale concerned the desert oases. Monthly sampling from March 2017 to November 2018 captured 11 species belonging to two families and four different subfamilies				Acrotylus insubricus,Acrotylus longipes,Aiolopus simulatrix,Aiolopus thalassinus,Hyalorrhipis canescens,Locusta migratoria,Morphacris fasciata,Sphingonotus obscuratus lameerei,Sphingonutus octofasciatus,Sphingonutus rubescens,Sphingonutus savignyi,Oedaleus senegalensis,Heteracris harterti,Heteracris adspersa,Truxalis nasuta,Schistocerca gregaria,Calliptamus barbarus,Ochrilidia filicornis,Poekiloc…	JAHA
Algeria & Oasis	Soudani & Moussi (2020)	Abderrahmane Soudani, Abdelhamid Moussi	2020	Updated checklist and assemblages of grasshoppers (Orthoptera: Acridomorpha) associated with various habitats, including oases of Central Sahara in Algeria	African Zoology			1-11	10.1080/15627020.2020.1773310	Bouda	27.963173	-0.433162	Algeria	Diversity	The grasshopper communities of central Saharan ecosystems (Adrar region, Algeria) were studied at two scales: the first scale considered different biotopes in 23 localities.	Random sampling with different traps from February 2016 to February 2025	two families comprising 20 species, of which 13 are recorded for the first time in the region. The second scale concerned the desert oases. Monthly sampling from March 2017 to November 2018 captured 11 species belonging to two families and four different subfamilies				Acrotylus insubricus,Acrotylus longipes,Aiolopus simulatrix,Aiolopus thalassinus,Hyalorrhipis canescens,Locusta migratoria,Morphacris fasciata,Sphingonotus obscuratus lameerei,Sphingonutus octofasciatus,Sphingonutus rubescens,Sphingonutus savignyi,Oedaleus senegalensis,Heteracris harterti,Heteracris adspersa,Truxalis nasuta,Schistocerca gregaria,Calliptamus barbarus,Ochrilidia filicornis,Poekiloc…	JAHA
Algeria & Oasis	Soudani & Moussi (2020)	Abderrahmane Soudani, Abdelhamid Moussi	2020	Updated checklist and assemblages of grasshoppers (Orthoptera: Acridomorpha) associated with various habitats, including oases of Central Sahara in Algeria	African Zoology			1-11	10.1080/15627020.2020.1773310	Meraguene	28.031056	-0.267361	Algeria	Diversity	The grasshopper communities of central Saharan ecosystems (Adrar region, Algeria) were studied at two scales: the first scale considered different biotopes in 23 localities.	Random sampling with different traps from February 2016 to February 2026	two families comprising 20 species, of which 13 are recorded for the first time in the region. The second scale concerned the desert oases. Monthly sampling from March 2017 to November 2018 captured 11 species belonging to two families and four different subfamilies				Acrotylus insubricus,Acrotylus longipes,Aiolopus simulatrix,Aiolopus thalassinus,Hyalorrhipis canescens,Locusta migratoria,Morphacris fasciata,Sphingonotus obscuratus lameerei,Sphingonutus octofasciatus,Sphingonutus rubescens,Sphingonutus savignyi,Oedaleus senegalensis,Heteracris harterti,Heteracris adspersa,Truxalis nasuta,Schistocerca gregaria,Calliptamus barbarus,Ochrilidia filicornis,Poekiloc…	JAHA
Algeria & Oasis	Soudani & Moussi (2020)	Abderrahmane Soudani, Abdelhamid Moussi	2020	Updated checklist and assemblages of grasshoppers (Orthoptera: Acridomorpha) associated with various habitats, including oases of Central Sahara in Algeria	African Zoology			1-11	10.1080/15627020.2020.1773310	Sebaa	28.222694	-0.164806	Algeria	Diversity	The grasshopper communities of central Saharan ecosystems (Adrar region, Algeria) were studied at two scales: the first scale considered different biotopes in 23 localities.	Random sampling with different traps from February 2016 to February 2027	two families comprising 20 species, of which 13 are recorded for the first time in the region. The second scale concerned the desert oases. Monthly sampling from March 2017 to November 2018 captured 11 species belonging to two families and four different subfamilies				Acrotylus insubricus,Acrotylus longipes,Aiolopus simulatrix,Aiolopus thalassinus,Hyalorrhipis canescens,Locusta migratoria,Morphacris fasciata,Sphingonotus obscuratus lameerei,Sphingonutus octofasciatus,Sphingonutus rubescens,Sphingonutus savignyi,Oedaleus senegalensis,Heteracris harterti,Heteracris adspersa,Truxalis nasuta,Schistocerca gregaria,Calliptamus barbarus,Ochrilidia filicornis,Poekiloc…	JAHA
Algeria & Oasis	Soudani & Moussi (2020)	Abderrahmane Soudani, Abdelhamid Moussi	2020	Updated checklist and assemblages of grasshoppers (Orthoptera: Acridomorpha) associated with various habitats, including oases of Central Sahara in Algeria	African Zoology			1-11	10.1080/15627020.2020.1773310	Tsabit	28.349650	-0.227575	Algeria	Diversity	The grasshopper communities of central Saharan ecosystems (Adrar region, Algeria) were studied at two scales: the first scale considered different biotopes in 23 localities.	Random sampling with different traps from February 2016 to February 2028	two families comprising 20 species, of which 13 are recorded for the first time in the region. The second scale concerned the desert oases. Monthly sampling from March 2017 to November 2018 captured 11 species belonging to two families and four different subfamilies				Acrotylus insubricus,Acrotylus longipes,Aiolopus simulatrix,Aiolopus thalassinus,Hyalorrhipis canescens,Locusta migratoria,Morphacris fasciata,Sphingonotus obscuratus lameerei,Sphingonutus octofasciatus,Sphingonutus rubescens,Sphingonutus savignyi,Oedaleus senegalensis,Heteracris harterti,Heteracris adspersa,Truxalis nasuta,Schistocerca gregaria,Calliptamus barbarus,Ochrilidia filicornis,Poekiloc…	JAHA
Algeria & Oasis	Soudani & Moussi (2020)	Abderrahmane Soudani, Abdelhamid Moussi	2020	Updated checklist and assemblages of grasshoppers (Orthoptera: Acridomorpha) associated with various habitats, including oases of Central Sahara in Algeria	African Zoology			1-11	10.1080/15627020.2020.1773310	El Metarfa	28.686722	-0.120917	Algeria	Diversity	The grasshopper communities of central Saharan ecosystems (Adrar region, Algeria) were studied at two scales: the first scale considered different biotopes in 23 localities.	Random sampling with different traps from February 2016 to February 2029	two families comprising 20 species, of which 13 are recorded for the first time in the region. The second scale concerned the desert oases. Monthly sampling from March 2017 to November 2018 captured 11 species belonging to two families and four different subfamilies				Acrotylus insubricus,Acrotylus longipes,Aiolopus simulatrix,Aiolopus thalassinus,Hyalorrhipis canescens,Locusta migratoria,Morphacris fasciata,Sphingonotus obscuratus lameerei,Sphingonutus octofasciatus,Sphingonutus rubescens,Sphingonutus savignyi,Oedaleus senegalensis,Heteracris harterti,Heteracris adspersa,Truxalis nasuta,Schistocerca gregaria,Calliptamus barbarus,Ochrilidia filicornis,Poekiloc…	JAHA
Algeria & Oasis	Soudani & Moussi (2020)	Abderrahmane Soudani, Abdelhamid Moussi	2020	Updated checklist and assemblages of grasshoppers (Orthoptera: Acridomorpha) associated with various habitats, including oases of Central Sahara in Algeria	African Zoology			1-11	10.1080/15627020.2020.1773310	Aougrout	28.699194	0.333262	Algeria	Diversity	The grasshopper communities of central Saharan ecosystems (Adrar region, Algeria) were studied at two scales: the first scale considered different biotopes in 23 localities.	Random sampling with different traps from February 2016 to February 2030	two families comprising 20 species, of which 13 are recorded for the first time in the region. The second scale concerned the desert oases. Monthly sampling from March 2017 to November 2018 captured 11 species belonging to two families and four different subfamilies				Acrotylus insubricus,Acrotylus longipes,Aiolopus simulatrix,Aiolopus thalassinus,Hyalorrhipis canescens,Locusta migratoria,Morphacris fasciata,Sphingonotus obscuratus lameerei,Sphingonutus octofasciatus,Sphingonutus rubescens,Sphingonutus savignyi,Oedaleus senegalensis,Heteracris harterti,Heteracris adspersa,Truxalis nasuta,Schistocerca gregaria,Calliptamus barbarus,Ochrilidia filicornis,Poekiloc…	JAHA
Algeria & Oasis	Soudani & Moussi (2020)	Abderrahmane Soudani, Abdelhamid Moussi	2020	Updated checklist and assemblages of grasshoppers (Orthoptera: Acridomorpha) associated with various habitats, including oases of Central Sahara in Algeria	African Zoology			1-11	10.1080/15627020.2020.1773310	Timimoun	29.265622	0.222565	Algeria	Diversity	The grasshopper communities of central Saharan ecosystems (Adrar region, Algeria) were studied at two scales: the first scale considered different biotopes in 23 localities.	Random sampling with different traps from February 2016 to February 2031	two families comprising 20 species, of which 13 are recorded for the first time in the region. The second scale concerned the desert oases. Monthly sampling from March 2017 to November 2018 captured 11 species belonging to two families and four different subfamilies				Acrotylus insubricus,Acrotylus longipes,Aiolopus simulatrix,Aiolopus thalassinus,Hyalorrhipis canescens,Locusta migratoria,Morphacris fasciata,Sphingonotus obscuratus lameerei,Sphingonutus octofasciatus,Sphingonutus rubescens,Sphingonutus savignyi,Oedaleus senegalensis,Heteracris harterti,Heteracris adspersa,Truxalis nasuta,Schistocerca gregaria,Calliptamus barbarus,Ochrilidia filicornis,Poekiloc…	JAHA
Algeria & Oasis	Soudani & Moussi (2020)	Abderrahmane Soudani, Abdelhamid Moussi	2020	Updated checklist and assemblages of grasshoppers (Orthoptera: Acridomorpha) associated with various habitats, including oases of Central Sahara in Algeria	African Zoology			1-11	10.1080/15627020.2020.1773310	Ouled Said	29.419008	0.242616	Algeria	Diversity	The grasshopper communities of central Saharan ecosystems (Adrar region, Algeria) were studied at two scales: the first scale considered different biotopes in 23 localities.	Random sampling with different traps from February 2016 to February 2032	two families comprising 20 species, of which 13 are recorded for the first time in the region. The second scale concerned the desert oases. Monthly sampling from March 2017 to November 2018 captured 11 species belonging to two families and four different subfamilies				Acrotylus insubricus,Acrotylus longipes,Aiolopus simulatrix,Aiolopus thalassinus,Hyalorrhipis canescens,Locusta migratoria,Morphacris fasciata,Sphingonotus obscuratus lameerei,Sphingonutus octofasciatus,Sphingonutus rubescens,Sphingonutus savignyi,Oedaleus senegalensis,Heteracris harterti,Heteracris adspersa,Truxalis nasuta,Schistocerca gregaria,Calliptamus barbarus,Ochrilidia filicornis,Poekiloc…	JAHA
Algeria & Oasis	Soudani & Moussi (2020)	Abderrahmane Soudani, Abdelhamid Moussi	2020	Updated checklist and assemblages of grasshoppers (Orthoptera: Acridomorpha) associated with various habitats, including oases of Central Sahara in Algeria	African Zoology			1-11	10.1080/15627020.2020.1773310	Charouine	29.038556	-0.257333	Algeria	Diversity	The grasshopper communities of central Saharan ecosystems (Adrar region, Algeria) were studied at two scales: the first scale considered different biotopes in 23 localities.	Random sampling with different traps from February 2016 to February 2033	two families comprising 20 species, of which 13 are recorded for the first time in the region. The second scale concerned the desert oases. Monthly sampling from March 2017 to November 2018 captured 11 species belonging to two families and four different subfamilies				Acrotylus insubricus,Acrotylus longipes,Aiolopus simulatrix,Aiolopus thalassinus,Hyalorrhipis canescens,Locusta migratoria,Morphacris fasciata,Sphingonotus obscuratus lameerei,Sphingonutus octofasciatus,Sphingonutus rubescens,Sphingonutus savignyi,Oedaleus senegalensis,Heteracris harterti,Heteracris adspersa,Truxalis nasuta,Schistocerca gregaria,Calliptamus barbarus,Ochrilidia filicornis,Poekiloc…	JAHA
Algeria & Oasis	Soudani & Moussi (2020)	Abderrahmane Soudani, Abdelhamid Moussi	2020	Updated checklist and assemblages of grasshoppers (Orthoptera: Acridomorpha) associated with various habitats, including oases of Central Sahara in Algeria	African Zoology			1-11	10.1080/15627020.2020.1773310	Telmine	29.306750	-0.534306	Algeria	Diversity	The grasshopper communities of central Saharan ecosystems (Adrar region, Algeria) were studied at two scales: the first scale considered different biotopes in 23 localities.	Random sampling with different traps from February 2016 to February 2034	two families comprising 20 species, of which 13 are recorded for the first time in the region. The second scale concerned the desert oases. Monthly sampling from March 2017 to November 2018 captured 11 species belonging to two families and four different subfamilies				Acrotylus insubricus,Acrotylus longipes,Aiolopus simulatrix,Aiolopus thalassinus,Hyalorrhipis canescens,Locusta migratoria,Morphacris fasciata,Sphingonotus obscuratus lameerei,Sphingonutus octofasciatus,Sphingonutus rubescens,Sphingonutus savignyi,Oedaleus senegalensis,Heteracris harterti,Heteracris adspersa,Truxalis nasuta,Schistocerca gregaria,Calliptamus barbarus,Ochrilidia filicornis,Poekiloc…	JAHA
Algeria & Oasis	Soudani & Moussi (2020)	Abderrahmane Soudani, Abdelhamid Moussi	2020	Updated checklist and assemblages of grasshoppers (Orthoptera: Acridomorpha) associated with various habitats, including oases of Central Sahara in Algeria	African Zoology			1-11	10.1080/15627020.2020.1773310	Tinerkouk	29.706928	0.711165	Algeria	Diversity	The grasshopper communities of central Saharan ecosystems (Adrar region, Algeria) were studied at two scales: the first scale considered different biotopes in 23 localities.	Random sampling with different traps from February 2016 to February 2035	two families comprising 20 species, of which 13 are recorded for the first time in the region. The second scale concerned the desert oases. Monthly sampling from March 2017 to November 2018 captured 11 species belonging to two families and four different subfamilies				Acrotylus insubricus,Acrotylus longipes,Aiolopus simulatrix,Aiolopus thalassinus,Hyalorrhipis canescens,Locusta migratoria,Morphacris fasciata,Sphingonotus obscuratus lameerei,Sphingonutus octofasciatus,Sphingonutus rubescens,Sphingonutus savignyi,Oedaleus senegalensis,Heteracris harterti,Heteracris adspersa,Truxalis nasuta,Schistocerca gregaria,Calliptamus barbarus,Ochrilidia filicornis,Poekiloc…	JAHA
Algeria & Oasis	Tabib et al (2015)	Rabie Tabib, Ala-Eddine Adamou, Mohamed Laïd Ouakid, Michał Glądalski, Jerzy Bańbur	2015	Nesting height and nest-cup volume variation in Rufous Bush Chats (Cercotrichas galactotes) inhabiting Algerian oases: consequences for breeding success	NEST CONSTRUCTION AND FUNCTION			114-119	10.3184/175815516X14575520344993	Al Amri oasis	34.704974	5.322896	Algeria	Ornitology	if the location and design of Rufous Bush Chat (Cercotrichas galactotes) nests influenced their breeding success in the Al Amri Oasis, at the base of Saharan Atlas, north Algeria, in 2008–2009 and 2011–2013	Nest-cup volumes the height of nests and breeding success measured	We conclude that pairs of Rufous Bush Chats that bred in higher nests had higher levels of breeding success because they suffered lower predation rates from ground-based predators than lower nests.	Date Palm orchards, and to a lesser extent, by Pomegranate (Punica granatum) and Common Fig (Ficus carica) plantations	Phoenix dactylidera,Punica granatum,Ficus carica		Cercotrichas galactotes	JAHA
Algeria & Oasis	Temmar et al (2007)	Mohamed Temmar, Carlos Labat, Salim Benkhedda, Meriem Charifi, Frederique Thomas, Mohamed Tahar Bouafia, Kathy Bean, Bernadette Darne, Michel E. Safarfand Athanase Benetos	2007	Prevalence and determinants of hypertension in the Algerian Sahara	Journal of Hypertension	25	11	2218-2226	10.1097/HJH.0b013e3282dc7549	In Salah	27.196258	2.461980	Algeria		Hypertension in In-salah	A randomized sample of 635 men and 711 women, aged 40-99 years, was studied. Blood pressure measurements, combined with a clinical questionnaire that included educational and socio-economic data, and standard blood samples for the detection of dyslipidemia and diabetes mellitus, were collected.	The prevalence of hypertension was 44% and was highly influenced by age, sex, skin colour, educational status, obesity and metabolic parameters.					JAHA
Algeria & Oasis	Yassaa et al (2001)	Noureddine Yassaa, Brahim Youcef Meklati, Enzo Brancaleoni, Massimiliano Frattoni, Paolo Ciccioli	2001	Polar and non-polar volatile organic compounds (VOCs) in urban Algiers and saharian sites of Algeria	Atmospheric Environment	35		787-801		Beni Isguen	32.460125	3.678992	Algeria	human impact	polar and non-polar organic compounds from C4 to C20 have been identi"ed and quanti"ed in one urban and two saharan sites located in Algeria.	They were collected on adsorption traps "lled with graphitic carbons and analyzed by high-resolution gas chromatography}mass spectrometry after thermal desorption.	More than 190 compounds released by man-made and biogenic sources or formed in air by degradation of photochemical smog precursors were identi"ed in the city center of Algiers. Some of them were never reported before.					JAHA
Algeria & Oasis	Zehdi-Azouzi et al (2015)	Salwa Zehdi-Azouzi, Emira Cherif, Souhila Moussouni, Muriel Gros-Balthazard, Summar Abbas Naqvi, Bertha Luden˜a,, Karina Castillo, Nathalie Chabrillange, Nadia Bouguedoura, Malika Bennaceur, Farida Si-Dehbi, Sabira Abdoulkader, Abdourahman Daher, Jean-Frederic Terral, Sylvain Santoni, Marco Ballardini, Antonio Mercuri, Mohamed Ben Salah, Karim Kadri, Ahmed Othmani, Claudio Littardi, Amel Salhi-Ha…	2015	Genetic structure of the date palm (Phoenix dactylifera) in the Old World reveals a strong differentiation between eastern and western populations	Annals of Botany	116		101-112	10.1093/aob/mcv068	Atar	20.532188	-13.042937	Mauritania	Genetics	contribute to the varietal improvement of date palms and to provide new insights on the influence of geographic origins and human activity on the genetic structure of the date palm, this study analysed the diversity of the species.	Genetic diversity levels and population genetic structure were investigated through the genotyping of a collection of 295 date palm accessions ranging from Mauritania to Pakistan using a set of 18 simple sequence repeat (SSR) markers and a plastid minisatellite.	the date palm genotypes can be structured into two different gene pools: the first, termed the Eastern pool, consists of accessions from Asia and Djibouti, whilst the second, termed the Western pool, consists of accessions from Africa	Date palm	Phoenix dactylifera			JAHA
Algeria & Oasis	Zehdi-Azouzi et al (2015)	Salwa Zehdi-Azouzi, Emira Cherif, Souhila Moussouni, Muriel Gros-Balthazard, Summar Abbas Naqvi, Bertha Luden˜a,, Karina Castillo, Nathalie Chabrillange, Nadia Bouguedoura, Malika Bennaceur, Farida Si-Dehbi, Sabira Abdoulkader, Abdourahman Daher, Jean-Frederic Terral, Sylvain Santoni, Marco Ballardini, Antonio Mercuri, Mohamed Ben Salah, Karim Kadri, Ahmed Othmani, Claudio Littardi, Amel Salhi-Ha…	2015	Genetic structure of the date palm (Phoenix dactylifera) in the Old World reveals a strong differentiation between eastern and western populations	Annals of Botany	116		101-112	10.1093/aob/mcv068	Marrakesh	31.688165	-8.023305	Morocco	Genetics	contribute to the varietal improvement of date palms and to provide new insights on the influence of geographic origins and human activity on the genetic structure of the date palm, this study analysed the diversity of the species.	Genetic diversity levels and population genetic structure were investigated through the genotyping of a collection of 295 date palm accessions ranging from Mauritania to Pakistan using a set of 18 simple sequence repeat (SSR) markers and a plastid minisatellite.	the date palm genotypes can be structured into two different gene pools: the first, termed the Eastern pool, consists of accessions from Asia and Djibouti, whilst the second, termed the Western pool, consists of accessions from Africa	Date palm	Phoenix dactylifera			JAHA
Algeria & Oasis	Zehdi-Azouzi et al (2015)	Salwa Zehdi-Azouzi, Emira Cherif, Souhila Moussouni, Muriel Gros-Balthazard, Summar Abbas Naqvi, Bertha Luden˜a,, Karina Castillo, Nathalie Chabrillange, Nadia Bouguedoura, Malika Bennaceur, Farida Si-Dehbi, Sabira Abdoulkader, Abdourahman Daher, Jean-Frederic Terral, Sylvain Santoni, Marco Ballardini, Antonio Mercuri, Mohamed Ben Salah, Karim Kadri, Ahmed Othmani, Claudio Littardi, Amel Salhi-Ha…	2015	Genetic structure of the date palm (Phoenix dactylifera) in the Old World reveals a strong differentiation between eastern and western populations	Annals of Botany	116		101-112	10.1093/aob/mcv068	Drâa river	29.214526	-7.915634	Morocco	Genetics	contribute to the varietal improvement of date palms and to provide new insights on the influence of geographic origins and human activity on the genetic structure of the date palm, this study analysed the diversity of the species.	Genetic diversity levels and population genetic structure were investigated through the genotyping of a collection of 295 date palm accessions ranging from Mauritania to Pakistan using a set of 18 simple sequence repeat (SSR) markers and a plastid minisatellite.	the date palm genotypes can be structured into two different gene pools: the first, termed the Eastern pool, consists of accessions from Asia and Djibouti, whilst the second, termed the Western pool, consists of accessions from Africa	Date palm	Phoenix dactylifera			JAHA
Algeria & Oasis	Zehdi-Azouzi et al (2015)	Salwa Zehdi-Azouzi, Emira Cherif, Souhila Moussouni, Muriel Gros-Balthazard, Summar Abbas Naqvi, Bertha Luden˜a,, Karina Castillo, Nathalie Chabrillange, Nadia Bouguedoura, Malika Bennaceur, Farida Si-Dehbi, Sabira Abdoulkader, Abdourahman Daher, Jean-Frederic Terral, Sylvain Santoni, Marco Ballardini, Antonio Mercuri, Mohamed Ben Salah, Karim Kadri, Ahmed Othmani, Claudio Littardi, Amel Salhi-Ha…	2015	Genetic structure of the date palm (Phoenix dactylifera) in the Old World reveals a strong differentiation between eastern and western populations	Annals of Botany	116		101-112	10.1093/aob/mcv068	Zagora	30.345477	-5.825210	Morocco	Genetics	contribute to the varietal improvement of date palms and to provide new insights on the influence of geographic origins and human activity on the genetic structure of the date palm, this study analysed the diversity of the species.	Genetic diversity levels and population genetic structure were investigated through the genotyping of a collection of 295 date palm accessions ranging from Mauritania to Pakistan using a set of 18 simple sequence repeat (SSR) markers and a plastid minisatellite.	the date palm genotypes can be structured into two different gene pools: the first, termed the Eastern pool, consists of accessions from Asia and Djibouti, whilst the second, termed the Western pool, consists of accessions from Africa	Date palm	Phoenix dactylifera			JAHA
Algeria & Oasis	Zehdi-Azouzi et al (2015)	Salwa Zehdi-Azouzi, Emira Cherif, Souhila Moussouni, Muriel Gros-Balthazard, Summar Abbas Naqvi, Bertha Luden˜a,, Karina Castillo, Nathalie Chabrillange, Nadia Bouguedoura, Malika Bennaceur, Farida Si-Dehbi, Sabira Abdoulkader, Abdourahman Daher, Jean-Frederic Terral, Sylvain Santoni, Marco Ballardini, Antonio Mercuri, Mohamed Ben Salah, Karim Kadri, Ahmed Othmani, Claudio Littardi, Amel Salhi-Ha…	2015	Genetic structure of the date palm (Phoenix dactylifera) in the Old World reveals a strong differentiation between eastern and western populations	Annals of Botany	116		101-112	10.1093/aob/mcv068	Errachidia	31.963302	-4.456198	Morocco	Genetics	contribute to the varietal improvement of date palms and to provide new insights on the influence of geographic origins and human activity on the genetic structure of the date palm, this study analysed the diversity of the species.	Genetic diversity levels and population genetic structure were investigated through the genotyping of a collection of 295 date palm accessions ranging from Mauritania to Pakistan using a set of 18 simple sequence repeat (SSR) markers and a plastid minisatellite.	the date palm genotypes can be structured into two different gene pools: the first, termed the Eastern pool, consists of accessions from Asia and Djibouti, whilst the second, termed the Western pool, consists of accessions from Africa	Date palm	Phoenix dactylifera			JAHA
Algeria & Oasis	Zehdi-Azouzi et al (2015)	Salwa Zehdi-Azouzi, Emira Cherif, Souhila Moussouni, Muriel Gros-Balthazard, Summar Abbas Naqvi, Bertha Luden˜a,, Karina Castillo, Nathalie Chabrillange, Nadia Bouguedoura, Malika Bennaceur, Farida Si-Dehbi, Sabira Abdoulkader, Abdourahman Daher, Jean-Frederic Terral, Sylvain Santoni, Marco Ballardini, Antonio Mercuri, Mohamed Ben Salah, Karim Kadri, Ahmed Othmani, Claudio Littardi, Amel Salhi-Ha…	2015	Genetic structure of the date palm (Phoenix dactylifera) in the Old World reveals a strong differentiation between eastern and western populations	Annals of Botany	116		101-112	10.1093/aob/mcv068	Zaouia Sidi Abdellali	31.523230	-5.526128	Morocco	Genetics	contribute to the varietal improvement of date palms and to provide new insights on the influence of geographic origins and human activity on the genetic structure of the date palm, this study analysed the diversity of the species.	Genetic diversity levels and population genetic structure were investigated through the genotyping of a collection of 295 date palm accessions ranging from Mauritania to Pakistan using a set of 18 simple sequence repeat (SSR) markers and a plastid minisatellite.	the date palm genotypes can be structured into two different gene pools: the first, termed the Eastern pool, consists of accessions from Asia and Djibouti, whilst the second, termed the Western pool, consists of accessions from Africa	Date palm	Phoenix dactylifera			JAHA
Algeria & Oasis	Zehdi-Azouzi et al (2015)	Salwa Zehdi-Azouzi, Emira Cherif, Souhila Moussouni, Muriel Gros-Balthazard, Summar Abbas Naqvi, Bertha Luden˜a,, Karina Castillo, Nathalie Chabrillange, Nadia Bouguedoura, Malika Bennaceur, Farida Si-Dehbi, Sabira Abdoulkader, Abdourahman Daher, Jean-Frederic Terral, Sylvain Santoni, Marco Ballardini, Antonio Mercuri, Mohamed Ben Salah, Karim Kadri, Ahmed Othmani, Claudio Littardi, Amel Salhi-Ha…	2015	Genetic structure of the date palm (Phoenix dactylifera) in the Old World reveals a strong differentiation between eastern and western populations	Annals of Botany	116		101-112	10.1093/aob/mcv068	Djamaa	33.558409	6.002825	Algeria	Genetics	contribute to the varietal improvement of date palms and to provide new insights on the influence of geographic origins and human activity on the genetic structure of the date palm, this study analysed the diversity of the species.	Genetic diversity levels and population genetic structure were investigated through the genotyping of a collection of 295 date palm accessions ranging from Mauritania to Pakistan using a set of 18 simple sequence repeat (SSR) markers and a plastid minisatellite.	the date palm genotypes can be structured into two different gene pools: the first, termed the Eastern pool, consists of accessions from Asia and Djibouti, whilst the second, termed the Western pool, consists of accessions from Africa	Date palm	Phoenix dactylifera			JAHA
Algeria & Oasis	Zehdi-Azouzi et al (2015)	Salwa Zehdi-Azouzi, Emira Cherif, Souhila Moussouni, Muriel Gros-Balthazard, Summar Abbas Naqvi, Bertha Luden˜a,, Karina Castillo, Nathalie Chabrillange, Nadia Bouguedoura, Malika Bennaceur, Farida Si-Dehbi, Sabira Abdoulkader, Abdourahman Daher, Jean-Frederic Terral, Sylvain Santoni, Marco Ballardini, Antonio Mercuri, Mohamed Ben Salah, Karim Kadri, Ahmed Othmani, Claudio Littardi, Amel Salhi-Ha…	2015	Genetic structure of the date palm (Phoenix dactylifera) in the Old World reveals a strong differentiation between eastern and western populations	Annals of Botany	116		101-112	10.1093/aob/mcv068	Adrar	27.863963	-0.302499	Algeria	Genetics	contribute to the varietal improvement of date palms and to provide new insights on the influence of geographic origins and human activity on the genetic structure of the date palm, this study analysed the diversity of the species.	Genetic diversity levels and population genetic structure were investigated through the genotyping of a collection of 295 date palm accessions ranging from Mauritania to Pakistan using a set of 18 simple sequence repeat (SSR) markers and a plastid minisatellite.	the date palm genotypes can be structured into two different gene pools: the first, termed the Eastern pool, consists of accessions from Asia and Djibouti, whilst the second, termed the Western pool, consists of accessions from Africa	Date palm	Phoenix dactylifera			JAHA
Algeria & Oasis	Zehdi-Azouzi et al (2015)	Salwa Zehdi-Azouzi, Emira Cherif, Souhila Moussouni, Muriel Gros-Balthazard, Summar Abbas Naqvi, Bertha Luden˜a,, Karina Castillo, Nathalie Chabrillange, Nadia Bouguedoura, Malika Bennaceur, Farida Si-Dehbi, Sabira Abdoulkader, Abdourahman Daher, Jean-Frederic Terral, Sylvain Santoni, Marco Ballardini, Antonio Mercuri, Mohamed Ben Salah, Karim Kadri, Ahmed Othmani, Claudio Littardi, Amel Salhi-Ha…	2015	Genetic structure of the date palm (Phoenix dactylifera) in the Old World reveals a strong differentiation between eastern and western populations	Annals of Botany	116		101-112	10.1093/aob/mcv068	Ghardaia	32.502160	3.642881	Algeria	Genetics	contribute to the varietal improvement of date palms and to provide new insights on the influence of geographic origins and human activity on the genetic structure of the date palm, this study analysed the diversity of the species.	Genetic diversity levels and population genetic structure were investigated through the genotyping of a collection of 295 date palm accessions ranging from Mauritania to Pakistan using a set of 18 simple sequence repeat (SSR) markers and a plastid minisatellite.	the date palm genotypes can be structured into two different gene pools: the first, termed the Eastern pool, consists of accessions from Asia and Djibouti, whilst the second, termed the Western pool, consists of accessions from Africa	Date palm	Phoenix dactylifera			JAHA
Algeria & Oasis	Zehdi-Azouzi et al (2015)	Salwa Zehdi-Azouzi, Emira Cherif, Souhila Moussouni, Muriel Gros-Balthazard, Summar Abbas Naqvi, Bertha Luden˜a,, Karina Castillo, Nathalie Chabrillange, Nadia Bouguedoura, Malika Bennaceur, Farida Si-Dehbi, Sabira Abdoulkader, Abdourahman Daher, Jean-Frederic Terral, Sylvain Santoni, Marco Ballardini, Antonio Mercuri, Mohamed Ben Salah, Karim Kadri, Ahmed Othmani, Claudio Littardi, Amel Salhi-Ha…	2015	Genetic structure of the date palm (Phoenix dactylifera) in the Old World reveals a strong differentiation between eastern and western populations	Annals of Botany	116		101-112	10.1093/aob/mcv068	Touggourt	33.114837	6.091385	Algeria	Genetics	contribute to the varietal improvement of date palms and to provide new insights on the influence of geographic origins and human activity on the genetic structure of the date palm, this study analysed the diversity of the species.	Genetic diversity levels and population genetic structure were investigated through the genotyping of a collection of 295 date palm accessions ranging from Mauritania to Pakistan using a set of 18 simple sequence repeat (SSR) markers and a plastid minisatellite.	the date palm genotypes can be structured into two different gene pools: the first, termed the Eastern pool, consists of accessions from Asia and Djibouti, whilst the second, termed the Western pool, consists of accessions from Africa	Date palm	Phoenix dactylifera			JAHA
Algeria & Oasis	Zehdi-Azouzi et al (2015)	Salwa Zehdi-Azouzi, Emira Cherif, Souhila Moussouni, Muriel Gros-Balthazard, Summar Abbas Naqvi, Bertha Luden˜a,, Karina Castillo, Nathalie Chabrillange, Nadia Bouguedoura, Malika Bennaceur, Farida Si-Dehbi, Sabira Abdoulkader, Abdourahman Daher, Jean-Frederic Terral, Sylvain Santoni, Marco Ballardini, Antonio Mercuri, Mohamed Ben Salah, Karim Kadri, Ahmed Othmani, Claudio Littardi, Amel Salhi-Ha…	2015	Genetic structure of the date palm (Phoenix dactylifera) in the Old World reveals a strong differentiation between eastern and western populations	Annals of Botany	116		101-112	10.1093/aob/mcv068	Timimoun	29.265622	0.222565	Algeria	Genetics	contribute to the varietal improvement of date palms and to provide new insights on the influence of geographic origins and human activity on the genetic structure of the date palm, this study analysed the diversity of the species.	Genetic diversity levels and population genetic structure were investigated through the genotyping of a collection of 295 date palm accessions ranging from Mauritania to Pakistan using a set of 18 simple sequence repeat (SSR) markers and a plastid minisatellite.	the date palm genotypes can be structured into two different gene pools: the first, termed the Eastern pool, consists of accessions from Asia and Djibouti, whilst the second, termed the Western pool, consists of accessions from Africa	Date palm	Phoenix dactylifera			JAHA
Algeria & Oasis	Zehdi-Azouzi et al (2015)	Salwa Zehdi-Azouzi, Emira Cherif, Souhila Moussouni, Muriel Gros-Balthazard, Summar Abbas Naqvi, Bertha Luden˜a,, Karina Castillo, Nathalie Chabrillange, Nadia Bouguedoura, Malika Bennaceur, Farida Si-Dehbi, Sabira Abdoulkader, Abdourahman Daher, Jean-Frederic Terral, Sylvain Santoni, Marco Ballardini, Antonio Mercuri, Mohamed Ben Salah, Karim Kadri, Ahmed Othmani, Claudio Littardi, Amel Salhi-Ha…	2015	Genetic structure of the date palm (Phoenix dactylifera) in the Old World reveals a strong differentiation between eastern and western populations	Annals of Botany	116		101-112	10.1093/aob/mcv068	Biskra oasis	34.833333	5.750000	Algeria	Genetics	contribute to the varietal improvement of date palms and to provide new insights on the influence of geographic origins and human activity on the genetic structure of the date palm, this study analysed the diversity of the species.	Genetic diversity levels and population genetic structure were investigated through the genotyping of a collection of 295 date palm accessions ranging from Mauritania to Pakistan using a set of 18 simple sequence repeat (SSR) markers and a plastid minisatellite.	the date palm genotypes can be structured into two different gene pools: the first, termed the Eastern pool, consists of accessions from Asia and Djibouti, whilst the second, termed the Western pool, consists of accessions from Africa	Date palm	Phoenix dactylifera			JAHA
Algeria & Oasis	Zehdi-Azouzi et al (2015)	Salwa Zehdi-Azouzi, Emira Cherif, Souhila Moussouni, Muriel Gros-Balthazard, Summar Abbas Naqvi, Bertha Luden˜a,, Karina Castillo, Nathalie Chabrillange, Nadia Bouguedoura, Malika Bennaceur, Farida Si-Dehbi, Sabira Abdoulkader, Abdourahman Daher, Jean-Frederic Terral, Sylvain Santoni, Marco Ballardini, Antonio Mercuri, Mohamed Ben Salah, Karim Kadri, Ahmed Othmani, Claudio Littardi, Amel Salhi-Ha…	2015	Genetic structure of the date palm (Phoenix dactylifera) in the Old World reveals a strong differentiation between eastern and western populations	Annals of Botany	116		101-112	10.1093/aob/mcv068	El Menia	30.569519	2.891595	Algeria	Genetics	contribute to the varietal improvement of date palms and to provide new insights on the influence of geographic origins and human activity on the genetic structure of the date palm, this study analysed the diversity of the species.	Genetic diversity levels and population genetic structure were investigated through the genotyping of a collection of 295 date palm accessions ranging from Mauritania to Pakistan using a set of 18 simple sequence repeat (SSR) markers and a plastid minisatellite.	the date palm genotypes can be structured into two different gene pools: the first, termed the Eastern pool, consists of accessions from Asia and Djibouti, whilst the second, termed the Western pool, consists of accessions from Africa	Date palm	Phoenix dactylifera			JAHA
Algeria & Oasis	Zehdi-Azouzi et al (2015)	Salwa Zehdi-Azouzi, Emira Cherif, Souhila Moussouni, Muriel Gros-Balthazard, Summar Abbas Naqvi, Bertha Luden˜a,, Karina Castillo, Nathalie Chabrillange, Nadia Bouguedoura, Malika Bennaceur, Farida Si-Dehbi, Sabira Abdoulkader, Abdourahman Daher, Jean-Frederic Terral, Sylvain Santoni, Marco Ballardini, Antonio Mercuri, Mohamed Ben Salah, Karim Kadri, Ahmed Othmani, Claudio Littardi, Amel Salhi-Ha…	2015	Genetic structure of the date palm (Phoenix dactylifera) in the Old World reveals a strong differentiation between eastern and western populations	Annals of Botany	116		101-112	10.1093/aob/mcv068	Beni-abbes	30.124229	-2.171951	Algeria	Genetics	contribute to the varietal improvement of date palms and to provide new insights on the influence of geographic origins and human activity on the genetic structure of the date palm, this study analysed the diversity of the species.	Genetic diversity levels and population genetic structure were investigated through the genotyping of a collection of 295 date palm accessions ranging from Mauritania to Pakistan using a set of 18 simple sequence repeat (SSR) markers and a plastid minisatellite.	the date palm genotypes can be structured into two different gene pools: the first, termed the Eastern pool, consists of accessions from Asia and Djibouti, whilst the second, termed the Western pool, consists of accessions from Africa	Date palm	Phoenix dactylifera			JAHA
Algeria & Oasis	Zehdi-Azouzi et al (2015)	Salwa Zehdi-Azouzi, Emira Cherif, Souhila Moussouni, Muriel Gros-Balthazard, Summar Abbas Naqvi, Bertha Luden˜a,, Karina Castillo, Nathalie Chabrillange, Nadia Bouguedoura, Malika Bennaceur, Farida Si-Dehbi, Sabira Abdoulkader, Abdourahman Daher, Jean-Frederic Terral, Sylvain Santoni, Marco Ballardini, Antonio Mercuri, Mohamed Ben Salah, Karim Kadri, Ahmed Othmani, Claudio Littardi, Amel Salhi-Ha…	2015	Genetic structure of the date palm (Phoenix dactylifera) in the Old World reveals a strong differentiation between eastern and western populations	Annals of Botany	116		101-112	10.1093/aob/mcv068	Ouargla oasis	31.966667	5.333333	Algeria	Genetics	contribute to the varietal improvement of date palms and to provide new insights on the influence of geographic origins and human activity on the genetic structure of the date palm, this study analysed the diversity of the species.	Genetic diversity levels and population genetic structure were investigated through the genotyping of a collection of 295 date palm accessions ranging from Mauritania to Pakistan using a set of 18 simple sequence repeat (SSR) markers and a plastid minisatellite.	the date palm genotypes can be structured into two different gene pools: the first, termed the Eastern pool, consists of accessions from Asia and Djibouti, whilst the second, termed the Western pool, consists of accessions from Africa	Date palm	Phoenix dactylifera			JAHA
Algeria & Oasis	Zehdi-Azouzi et al (2015)	Salwa Zehdi-Azouzi, Emira Cherif, Souhila Moussouni, Muriel Gros-Balthazard, Summar Abbas Naqvi, Bertha Luden˜a,, Karina Castillo, Nathalie Chabrillange, Nadia Bouguedoura, Malika Bennaceur, Farida Si-Dehbi, Sabira Abdoulkader, Abdourahman Daher, Jean-Frederic Terral, Sylvain Santoni, Marco Ballardini, Antonio Mercuri, Mohamed Ben Salah, Karim Kadri, Ahmed Othmani, Claudio Littardi, Amel Salhi-Ha…	2015	Genetic structure of the date palm (Phoenix dactylifera) in the Old World reveals a strong differentiation between eastern and western populations	Annals of Botany	116		101-112	10.1093/aob/mcv068	Gabes	33.879179	10.076072	Tunisia	Genetics	contribute to the varietal improvement of date palms and to provide new insights on the influence of geographic origins and human activity on the genetic structure of the date palm, this study analysed the diversity of the species.	Genetic diversity levels and population genetic structure were investigated through the genotyping of a collection of 295 date palm accessions ranging from Mauritania to Pakistan using a set of 18 simple sequence repeat (SSR) markers and a plastid minisatellite.	the date palm genotypes can be structured into two different gene pools: the first, termed the Eastern pool, consists of accessions from Asia and Djibouti, whilst the second, termed the Western pool, consists of accessions from Africa	Date palm	Phoenix dactylifera			JAHA
Algeria & Oasis	Zehdi-Azouzi et al (2015)	Salwa Zehdi-Azouzi, Emira Cherif, Souhila Moussouni, Muriel Gros-Balthazard, Summar Abbas Naqvi, Bertha Luden˜a,, Karina Castillo, Nathalie Chabrillange, Nadia Bouguedoura, Malika Bennaceur, Farida Si-Dehbi, Sabira Abdoulkader, Abdourahman Daher, Jean-Frederic Terral, Sylvain Santoni, Marco Ballardini, Antonio Mercuri, Mohamed Ben Salah, Karim Kadri, Ahmed Othmani, Claudio Littardi, Amel Salhi-Ha…	2015	Genetic structure of the date palm (Phoenix dactylifera) in the Old World reveals a strong differentiation between eastern and western populations	Annals of Botany	116		101-112	10.1093/aob/mcv068	Tozeur oasis	33.910686	8.148386	Tunisia	Genetics	contribute to the varietal improvement of date palms and to provide new insights on the influence of geographic origins and human activity on the genetic structure of the date palm, this study analysed the diversity of the species.	Genetic diversity levels and population genetic structure were investigated through the genotyping of a collection of 295 date palm accessions ranging from Mauritania to Pakistan using a set of 18 simple sequence repeat (SSR) markers and a plastid minisatellite.	the date palm genotypes can be structured into two different gene pools: the first, termed the Eastern pool, consists of accessions from Asia and Djibouti, whilst the second, termed the Western pool, consists of accessions from Africa	Date palm	Phoenix dactylifera			JAHA
Algeria & Oasis	Zehdi-Azouzi et al (2015)	Salwa Zehdi-Azouzi, Emira Cherif, Souhila Moussouni, Muriel Gros-Balthazard, Summar Abbas Naqvi, Bertha Luden˜a,, Karina Castillo, Nathalie Chabrillange, Nadia Bouguedoura, Malika Bennaceur, Farida Si-Dehbi, Sabira Abdoulkader, Abdourahman Daher, Jean-Frederic Terral, Sylvain Santoni, Marco Ballardini, Antonio Mercuri, Mohamed Ben Salah, Karim Kadri, Ahmed Othmani, Claudio Littardi, Amel Salhi-Ha…	2015	Genetic structure of the date palm (Phoenix dactylifera) in the Old World reveals a strong differentiation between eastern and western populations	Annals of Botany	116		101-112	10.1093/aob/mcv068	Fayoum	29.367481	30.786853	Egypt	Genetics	contribute to the varietal improvement of date palms and to provide new insights on the influence of geographic origins and human activity on the genetic structure of the date palm, this study analysed the diversity of the species.	Genetic diversity levels and population genetic structure were investigated through the genotyping of a collection of 295 date palm accessions ranging from Mauritania to Pakistan using a set of 18 simple sequence repeat (SSR) markers and a plastid minisatellite.	the date palm genotypes can be structured into two different gene pools: the first, termed the Eastern pool, consists of accessions from Asia and Djibouti, whilst the second, termed the Western pool, consists of accessions from Africa	Date palm	Phoenix dactylifera			JAHA
Algeria & Oasis	Zehdi-Azouzi et al (2015)	Salwa Zehdi-Azouzi, Emira Cherif, Souhila Moussouni, Muriel Gros-Balthazard, Summar Abbas Naqvi, Bertha Luden˜a,, Karina Castillo, Nathalie Chabrillange, Nadia Bouguedoura, Malika Bennaceur, Farida Si-Dehbi, Sabira Abdoulkader, Abdourahman Daher, Jean-Frederic Terral, Sylvain Santoni, Marco Ballardini, Antonio Mercuri, Mohamed Ben Salah, Karim Kadri, Ahmed Othmani, Claudio Littardi, Amel Salhi-Ha…	2015	Genetic structure of the date palm (Phoenix dactylifera) in the Old World reveals a strong differentiation between eastern and western populations	Annals of Botany	116		101-112	10.1093/aob/mcv068	Rosetta	31.404646	30.400285	Egypt	Genetics	contribute to the varietal improvement of date palms and to provide new insights on the influence of geographic origins and human activity on the genetic structure of the date palm, this study analysed the diversity of the species.	Genetic diversity levels and population genetic structure were investigated through the genotyping of a collection of 295 date palm accessions ranging from Mauritania to Pakistan using a set of 18 simple sequence repeat (SSR) markers and a plastid minisatellite.	the date palm genotypes can be structured into two different gene pools: the first, termed the Eastern pool, consists of accessions from Asia and Djibouti, whilst the second, termed the Western pool, consists of accessions from Africa	Date palm	Phoenix dactylifera			JAHA
Algeria & Oasis	Zehdi-Azouzi et al (2015)	Salwa Zehdi-Azouzi, Emira Cherif, Souhila Moussouni, Muriel Gros-Balthazard, Summar Abbas Naqvi, Bertha Luden˜a,, Karina Castillo, Nathalie Chabrillange, Nadia Bouguedoura, Malika Bennaceur, Farida Si-Dehbi, Sabira Abdoulkader, Abdourahman Daher, Jean-Frederic Terral, Sylvain Santoni, Marco Ballardini, Antonio Mercuri, Mohamed Ben Salah, Karim Kadri, Ahmed Othmani, Claudio Littardi, Amel Salhi-Ha…	2015	Genetic structure of the date palm (Phoenix dactylifera) in the Old World reveals a strong differentiation between eastern and western populations	Annals of Botany	116		101-112	10.1093/aob/mcv068	Siwa	29.206355	25.531078	Egypt	Genetics	contribute to the varietal improvement of date palms and to provide new insights on the influence of geographic origins and human activity on the genetic structure of the date palm, this study analysed the diversity of the species.	Genetic diversity levels and population genetic structure were investigated through the genotyping of a collection of 295 date palm accessions ranging from Mauritania to Pakistan using a set of 18 simple sequence repeat (SSR) markers and a plastid minisatellite.	the date palm genotypes can be structured into two different gene pools: the first, termed the Eastern pool, consists of accessions from Asia and Djibouti, whilst the second, termed the Western pool, consists of accessions from Africa	Date palm	Phoenix dactylifera			JAHA
Algeria & Oasis	Zehdi-Azouzi et al (2015)	Salwa Zehdi-Azouzi, Emira Cherif, Souhila Moussouni, Muriel Gros-Balthazard, Summar Abbas Naqvi, Bertha Luden˜a,, Karina Castillo, Nathalie Chabrillange, Nadia Bouguedoura, Malika Bennaceur, Farida Si-Dehbi, Sabira Abdoulkader, Abdourahman Daher, Jean-Frederic Terral, Sylvain Santoni, Marco Ballardini, Antonio Mercuri, Mohamed Ben Salah, Karim Kadri, Ahmed Othmani, Claudio Littardi, Amel Salhi-Ha…	2015	Genetic structure of the date palm (Phoenix dactylifera) in the Old World reveals a strong differentiation between eastern and western populations	Annals of Botany	116		101-112	10.1093/aob/mcv068	Saqqara	29.867832	31.231776	Egypt	Genetics	contribute to the varietal improvement of date palms and to provide new insights on the influence of geographic origins and human activity on the genetic structure of the date palm, this study analysed the diversity of the species.	Genetic diversity levels and population genetic structure were investigated through the genotyping of a collection of 295 date palm accessions ranging from Mauritania to Pakistan using a set of 18 simple sequence repeat (SSR) markers and a plastid minisatellite.	the date palm genotypes can be structured into two different gene pools: the first, termed the Eastern pool, consists of accessions from Asia and Djibouti, whilst the second, termed the Western pool, consists of accessions from Africa	Date palm	Phoenix dactylifera			JAHA
Algeria & Oasis	Zehdi-Azouzi et al (2015)	Salwa Zehdi-Azouzi, Emira Cherif, Souhila Moussouni, Muriel Gros-Balthazard, Summar Abbas Naqvi, Bertha Luden˜a,, Karina Castillo, Nathalie Chabrillange, Nadia Bouguedoura, Malika Bennaceur, Farida Si-Dehbi, Sabira Abdoulkader, Abdourahman Daher, Jean-Frederic Terral, Sylvain Santoni, Marco Ballardini, Antonio Mercuri, Mohamed Ben Salah, Karim Kadri, Ahmed Othmani, Claudio Littardi, Amel Salhi-Ha…	2015	Genetic structure of the date palm (Phoenix dactylifera) in the Old World reveals a strong differentiation between eastern and western populations	Annals of Botany	116		101-112	10.1093/aob/mcv068	Nord Assouan	24.121925	32.898646	Egypt	Genetics	contribute to the varietal improvement of date palms and to provide new insights on the influence of geographic origins and human activity on the genetic structure of the date palm, this study analysed the diversity of the species.	Genetic diversity levels and population genetic structure were investigated through the genotyping of a collection of 295 date palm accessions ranging from Mauritania to Pakistan using a set of 18 simple sequence repeat (SSR) markers and a plastid minisatellite.	the date palm genotypes can be structured into two different gene pools: the first, termed the Eastern pool, consists of accessions from Asia and Djibouti, whilst the second, termed the Western pool, consists of accessions from Africa	Date palm	Phoenix dactylifera			JAHA
Algeria & Oasis	Zehdi-Azouzi et al (2015)	Salwa Zehdi-Azouzi, Emira Cherif, Souhila Moussouni, Muriel Gros-Balthazard, Summar Abbas Naqvi, Bertha Luden˜a,, Karina Castillo, Nathalie Chabrillange, Nadia Bouguedoura, Malika Bennaceur, Farida Si-Dehbi, Sabira Abdoulkader, Abdourahman Daher, Jean-Frederic Terral, Sylvain Santoni, Marco Ballardini, Antonio Mercuri, Mohamed Ben Salah, Karim Kadri, Ahmed Othmani, Claudio Littardi, Amel Salhi-Ha…	2015	Genetic structure of the date palm (Phoenix dactylifera) in the Old World reveals a strong differentiation between eastern and western populations	Annals of Botany	116		101-112	10.1093/aob/mcv068	Luxor	25.694873	32.610510	Egypt	Genetics	contribute to the varietal improvement of date palms and to provide new insights on the influence of geographic origins and human activity on the genetic structure of the date palm, this study analysed the diversity of the species.	Genetic diversity levels and population genetic structure were investigated through the genotyping of a collection of 295 date palm accessions ranging from Mauritania to Pakistan using a set of 18 simple sequence repeat (SSR) markers and a plastid minisatellite.	the date palm genotypes can be structured into two different gene pools: the first, termed the Eastern pool, consists of accessions from Asia and Djibouti, whilst the second, termed the Western pool, consists of accessions from Africa	Date palm	Phoenix dactylifera			JAHA
Algeria & Oasis	Zehdi-Azouzi et al (2015)	Salwa Zehdi-Azouzi, Emira Cherif, Souhila Moussouni, Muriel Gros-Balthazard, Summar Abbas Naqvi, Bertha Luden˜a,, Karina Castillo, Nathalie Chabrillange, Nadia Bouguedoura, Malika Bennaceur, Farida Si-Dehbi, Sabira Abdoulkader, Abdourahman Daher, Jean-Frederic Terral, Sylvain Santoni, Marco Ballardini, Antonio Mercuri, Mohamed Ben Salah, Karim Kadri, Ahmed Othmani, Claudio Littardi, Amel Salhi-Ha…	2015	Genetic structure of the date palm (Phoenix dactylifera) in the Old World reveals a strong differentiation between eastern and western populations	Annals of Botany	116		101-112	10.1093/aob/mcv068	Saqqara	29.868047	31.232882	Egypt	Genetics	contribute to the varietal improvement of date palms and to provide new insights on the influence of geographic origins and human activity on the genetic structure of the date palm, this study analysed the diversity of the species.	Genetic diversity levels and population genetic structure were investigated through the genotyping of a collection of 295 date palm accessions ranging from Mauritania to Pakistan using a set of 18 simple sequence repeat (SSR) markers and a plastid minisatellite.	the date palm genotypes can be structured into two different gene pools: the first, termed the Eastern pool, consists of accessions from Asia and Djibouti, whilst the second, termed the Western pool, consists of accessions from Africa	Date palm	Phoenix dactylifera			JAHA
Algeria & Oasis	Zehdi-Azouzi et al (2015)	Salwa Zehdi-Azouzi, Emira Cherif, Souhila Moussouni, Muriel Gros-Balthazard, Summar Abbas Naqvi, Bertha Luden˜a,, Karina Castillo, Nathalie Chabrillange, Nadia Bouguedoura, Malika Bennaceur, Farida Si-Dehbi, Sabira Abdoulkader, Abdourahman Daher, Jean-Frederic Terral, Sylvain Santoni, Marco Ballardini, Antonio Mercuri, Mohamed Ben Salah, Karim Kadri, Ahmed Othmani, Claudio Littardi, Amel Salhi-Ha…	2015	Genetic structure of the date palm (Phoenix dactylifera) in the Old World reveals a strong differentiation between eastern and western populations	Annals of Botany	116		101-112	10.1093/aob/mcv068	Jaalan bani Abou Ali	22.02106	59.314478	Oman	Genetics	contribute to the varietal improvement of date palms and to provide new insights on the influence of geographic origins and human activity on the genetic structure of the date palm, this study analysed the diversity of the species.	Genetic diversity levels and population genetic structure were investigated through the genotyping of a collection of 295 date palm accessions ranging from Mauritania to Pakistan using a set of 18 simple sequence repeat (SSR) markers and a plastid minisatellite.	the date palm genotypes can be structured into two different gene pools: the first, termed the Eastern pool, consists of accessions from Asia and Djibouti, whilst the second, termed the Western pool, consists of accessions from Africa	Date palm	Phoenix dactylifera			JAHA
Algeria & Oasis	Zehdi-Azouzi et al (2015)	Salwa Zehdi-Azouzi, Emira Cherif, Souhila Moussouni, Muriel Gros-Balthazard, Summar Abbas Naqvi, Bertha Luden˜a,, Karina Castillo, Nathalie Chabrillange, Nadia Bouguedoura, Malika Bennaceur, Farida Si-Dehbi, Sabira Abdoulkader, Abdourahman Daher, Jean-Frederic Terral, Sylvain Santoni, Marco Ballardini, Antonio Mercuri, Mohamed Ben Salah, Karim Kadri, Ahmed Othmani, Claudio Littardi, Amel Salhi-Ha…	2015	Genetic structure of the date palm (Phoenix dactylifera) in the Old World reveals a strong differentiation between eastern and western populations	Annals of Botany	116		101-112	10.1093/aob/mcv068	Wadi Qurayat	23.087417	58.855802	Oman	Genetics	contribute to the varietal improvement of date palms and to provide new insights on the influence of geographic origins and human activity on the genetic structure of the date palm, this study analysed the diversity of the species.	Genetic diversity levels and population genetic structure were investigated through the genotyping of a collection of 295 date palm accessions ranging from Mauritania to Pakistan using a set of 18 simple sequence repeat (SSR) markers and a plastid minisatellite.	the date palm genotypes can be structured into two different gene pools: the first, termed the Eastern pool, consists of accessions from Asia and Djibouti, whilst the second, termed the Western pool, consists of accessions from Africa	Date palm	Phoenix dactylifera			JAHA
Algeria & Oasis	Zehdi-Azouzi et al (2015)	Salwa Zehdi-Azouzi, Emira Cherif, Souhila Moussouni, Muriel Gros-Balthazard, Summar Abbas Naqvi, Bertha Luden˜a,, Karina Castillo, Nathalie Chabrillange, Nadia Bouguedoura, Malika Bennaceur, Farida Si-Dehbi, Sabira Abdoulkader, Abdourahman Daher, Jean-Frederic Terral, Sylvain Santoni, Marco Ballardini, Antonio Mercuri, Mohamed Ben Salah, Karim Kadri, Ahmed Othmani, Claudio Littardi, Amel Salhi-Ha…	2015	Genetic structure of the date palm (Phoenix dactylifera) in the Old World reveals a strong differentiation between eastern and western populations	Annals of Botany	116		101-112	10.1093/aob/mcv068	Al Kamil	22.215264	59.207877	Oman	Genetics	contribute to the varietal improvement of date palms and to provide new insights on the influence of geographic origins and human activity on the genetic structure of the date palm, this study analysed the diversity of the species.	Genetic diversity levels and population genetic structure were investigated through the genotyping of a collection of 295 date palm accessions ranging from Mauritania to Pakistan using a set of 18 simple sequence repeat (SSR) markers and a plastid minisatellite.	the date palm genotypes can be structured into two different gene pools: the first, termed the Eastern pool, consists of accessions from Asia and Djibouti, whilst the second, termed the Western pool, consists of accessions from Africa	Date palm	Phoenix dactylifera			JAHA
Algeria & Oasis	Zehdi-Azouzi et al (2015)	Salwa Zehdi-Azouzi, Emira Cherif, Souhila Moussouni, Muriel Gros-Balthazard, Summar Abbas Naqvi, Bertha Luden˜a,, Karina Castillo, Nathalie Chabrillange, Nadia Bouguedoura, Malika Bennaceur, Farida Si-Dehbi, Sabira Abdoulkader, Abdourahman Daher, Jean-Frederic Terral, Sylvain Santoni, Marco Ballardini, Antonio Mercuri, Mohamed Ben Salah, Karim Kadri, Ahmed Othmani, Claudio Littardi, Amel Salhi-Ha…	2015	Genetic structure of the date palm (Phoenix dactylifera) in the Old World reveals a strong differentiation between eastern and western populations	Annals of Botany	116		101-112	10.1093/aob/mcv068	Jimi	24.254716	55.745009	United Arab Emirates	Genetics	contribute to the varietal improvement of date palms and to provide new insights on the influence of geographic origins and human activity on the genetic structure of the date palm, this study analysed the diversity of the species.	Genetic diversity levels and population genetic structure were investigated through the genotyping of a collection of 295 date palm accessions ranging from Mauritania to Pakistan using a set of 18 simple sequence repeat (SSR) markers and a plastid minisatellite.	the date palm genotypes can be structured into two different gene pools: the first, termed the Eastern pool, consists of accessions from Asia and Djibouti, whilst the second, termed the Western pool, consists of accessions from Africa	Date palm	Phoenix dactylifera			JAHA
Algeria & Oasis	Zehdi-Azouzi et al (2015)	Salwa Zehdi-Azouzi, Emira Cherif, Souhila Moussouni, Muriel Gros-Balthazard, Summar Abbas Naqvi, Bertha Luden˜a,, Karina Castillo, Nathalie Chabrillange, Nadia Bouguedoura, Malika Bennaceur, Farida Si-Dehbi, Sabira Abdoulkader, Abdourahman Daher, Jean-Frederic Terral, Sylvain Santoni, Marco Ballardini, Antonio Mercuri, Mohamed Ben Salah, Karim Kadri, Ahmed Othmani, Claudio Littardi, Amel Salhi-Ha…	2015	Genetic structure of the date palm (Phoenix dactylifera) in the Old World reveals a strong differentiation between eastern and western populations	Annals of Botany	116		101-112	10.1093/aob/mcv068	Al'Ayn	24.216672	55.768363	United Arab Emirates	Genetics	contribute to the varietal improvement of date palms and to provide new insights on the influence of geographic origins and human activity on the genetic structure of the date palm, this study analysed the diversity of the species.	Genetic diversity levels and population genetic structure were investigated through the genotyping of a collection of 295 date palm accessions ranging from Mauritania to Pakistan using a set of 18 simple sequence repeat (SSR) markers and a plastid minisatellite.	the date palm genotypes can be structured into two different gene pools: the first, termed the Eastern pool, consists of accessions from Asia and Djibouti, whilst the second, termed the Western pool, consists of accessions from Africa	Date palm	Phoenix dactylifera			JAHA
Algeria & Oasis	Zehdi-Azouzi et al (2015)	Salwa Zehdi-Azouzi, Emira Cherif, Souhila Moussouni, Muriel Gros-Balthazard, Summar Abbas Naqvi, Bertha Luden˜a,, Karina Castillo, Nathalie Chabrillange, Nadia Bouguedoura, Malika Bennaceur, Farida Si-Dehbi, Sabira Abdoulkader, Abdourahman Daher, Jean-Frederic Terral, Sylvain Santoni, Marco Ballardini, Antonio Mercuri, Mohamed Ben Salah, Karim Kadri, Ahmed Othmani, Claudio Littardi, Amel Salhi-Ha…	2015	Genetic structure of the date palm (Phoenix dactylifera) in the Old World reveals a strong differentiation between eastern and western populations	Annals of Botany	116		101-112	10.1093/aob/mcv068	Khatt	25.620355	56.007557	United Arab Emirates	Genetics	contribute to the varietal improvement of date palms and to provide new insights on the influence of geographic origins and human activity on the genetic structure of the date palm, this study analysed the diversity of the species.	Genetic diversity levels and population genetic structure were investigated through the genotyping of a collection of 295 date palm accessions ranging from Mauritania to Pakistan using a set of 18 simple sequence repeat (SSR) markers and a plastid minisatellite.	the date palm genotypes can be structured into two different gene pools: the first, termed the Eastern pool, consists of accessions from Asia and Djibouti, whilst the second, termed the Western pool, consists of accessions from Africa	Date palm	Phoenix dactylifera			JAHA
Algeria & Oasis	Zehdi-Azouzi et al (2015)	Salwa Zehdi-Azouzi, Emira Cherif, Souhila Moussouni, Muriel Gros-Balthazard, Summar Abbas Naqvi, Bertha Luden˜a,, Karina Castillo, Nathalie Chabrillange, Nadia Bouguedoura, Malika Bennaceur, Farida Si-Dehbi, Sabira Abdoulkader, Abdourahman Daher, Jean-Frederic Terral, Sylvain Santoni, Marco Ballardini, Antonio Mercuri, Mohamed Ben Salah, Karim Kadri, Ahmed Othmani, Claudio Littardi, Amel Salhi-Ha…	2015	Genetic structure of the date palm (Phoenix dactylifera) in the Old World reveals a strong differentiation between eastern and western populations	Annals of Botany	116		101-112	10.1093/aob/mcv068	Shemal	25.820015	56.028036	United Arab Emirates	Genetics	contribute to the varietal improvement of date palms and to provide new insights on the influence of geographic origins and human activity on the genetic structure of the date palm, this study analysed the diversity of the species.	Genetic diversity levels and population genetic structure were investigated through the genotyping of a collection of 295 date palm accessions ranging from Mauritania to Pakistan using a set of 18 simple sequence repeat (SSR) markers and a plastid minisatellite.	the date palm genotypes can be structured into two different gene pools: the first, termed the Eastern pool, consists of accessions from Asia and Djibouti, whilst the second, termed the Western pool, consists of accessions from Africa	Date palm	Phoenix dactylifera			JAHA
Algeria & Oasis	Zehdi-Azouzi et al (2015)	Salwa Zehdi-Azouzi, Emira Cherif, Souhila Moussouni, Muriel Gros-Balthazard, Summar Abbas Naqvi, Bertha Luden˜a,, Karina Castillo, Nathalie Chabrillange, Nadia Bouguedoura, Malika Bennaceur, Farida Si-Dehbi, Sabira Abdoulkader, Abdourahman Daher, Jean-Frederic Terral, Sylvain Santoni, Marco Ballardini, Antonio Mercuri, Mohamed Ben Salah, Karim Kadri, Ahmed Othmani, Claudio Littardi, Amel Salhi-Ha…	2015	Genetic structure of the date palm (Phoenix dactylifera) in the Old World reveals a strong differentiation between eastern and western populations	Annals of Botany	116		101-112	10.1093/aob/mcv068	Turbat	26.012881	63.053148	Pakistan	Genetics	contribute to the varietal improvement of date palms and to provide new insights on the influence of geographic origins and human activity on the genetic structure of the date palm, this study analysed the diversity of the species.	Genetic diversity levels and population genetic structure were investigated through the genotyping of a collection of 295 date palm accessions ranging from Mauritania to Pakistan using a set of 18 simple sequence repeat (SSR) markers and a plastid minisatellite.	the date palm genotypes can be structured into two different gene pools: the first, termed the Eastern pool, consists of accessions from Asia and Djibouti, whilst the second, termed the Western pool, consists of accessions from Africa	Date palm	Phoenix dactylifera			JAHA
Algeria & Oasis	Zehdi-Azouzi et al (2015)	Salwa Zehdi-Azouzi, Emira Cherif, Souhila Moussouni, Muriel Gros-Balthazard, Summar Abbas Naqvi, Bertha Luden˜a,, Karina Castillo, Nathalie Chabrillange, Nadia Bouguedoura, Malika Bennaceur, Farida Si-Dehbi, Sabira Abdoulkader, Abdourahman Daher, Jean-Frederic Terral, Sylvain Santoni, Marco Ballardini, Antonio Mercuri, Mohamed Ben Salah, Karim Kadri, Ahmed Othmani, Claudio Littardi, Amel Salhi-Ha…	2015	Genetic structure of the date palm (Phoenix dactylifera) in the Old World reveals a strong differentiation between eastern and western populations	Annals of Botany	116		101-112	10.1093/aob/mcv068	Dera Ismail Khan	31.846480	70.882873	Pakistan	Genetics	contribute to the varietal improvement of date palms and to provide new insights on the influence of geographic origins and human activity on the genetic structure of the date palm, this study analysed the diversity of the species.	Genetic diversity levels and population genetic structure were investigated through the genotyping of a collection of 295 date palm accessions ranging from Mauritania to Pakistan using a set of 18 simple sequence repeat (SSR) markers and a plastid minisatellite.	the date palm genotypes can be structured into two different gene pools: the first, termed the Eastern pool, consists of accessions from Asia and Djibouti, whilst the second, termed the Western pool, consists of accessions from Africa	Date palm	Phoenix dactylifera			JAHA
Argentina & Oasis	Blasco Lucas (2021)	Irene Blasco Lucas	2021	Sustainable refurbishment of massive neighborhood housing located in semi-arid climate: Micro economic and energy-thermal evaluation	Construction Reports	73		1-11	10.3989/ic.62118	San Juan	-31.639640	-68.487228	Argentina	Architecture	Analysis of the technical-economic feasibility of the building envelope refurbishmen	Analysis of passive technological variants adapted to the availability of local data covering climatic, energy-thermal and economic aspects in the building field	The eight alternatives for improvements proposed allow savings in air conditioning consumption that vary between 33% and 56%					MF
Argentina & Oasis	Alchapar & Correa (2016)	Noelia L. Alchapar , Erica N. Correa	2016	The use of reflective materials as a strategy for urban cooling in an arid “OASIS” city	Sustainable Cities and Society	27		1-14	10.1016/j.scs.2016.08.015	Mendoza	-33.010556	-68.874444	Argentina	Environment	Evaluation of how reflective materials of the urban envelope modify air temperatures in an urban sector of the metropolitan area of Mendoza, Argentina	18 scenarios with different morphologies and urban forest percentages were simulated with ENVI-met 3.1 software.	The results show that every 10% increase of albedo on horizontal surfaces decreases the outside air temperature by 0.75 °C. In all scenarios, increasing the albedo of building envelopes raises the mean radiant temperature.					MF
Argentina & Oasis	Alvarez et al (2015)	JUAN A. ALVAREZ, PABLO E. VILLAGRA, ERICA M. CESCA, FACUNDO ROJAS, SILVIA DELGADO	2015	Structure, distribution and conservation status of the Prosopis flexuosa woodlands in the Bolson de Fiambala (Catamarca).	Boletin de la Sociedad Argentina de Botanica	50	2	193-208		Fiambalá	-27.684894	-67.622013	Argentina	Ecology	Structure, distribution and conservation status of the Prosopis flexuosa woodlands. Knowledge of dryland forests is incomplete but needed for conservation and controlled use of these resources.	Woodland units were identified by supervised classification of images. Population studies were performed, allometric variables were measured and applied traditional dendrochronological techniques	Two woodland types were distinguished: dense forest with greatest total coverage (39%) and sparse forest (21%).					MF
Argentina & Oasis	Alvarez et al (2015)	JUAN A. ALVAREZ, PABLO E. VILLAGRA, ERICA M. CESCA, FACUNDO ROJAS, SILVIA DELGADO	2015	Structure, distribution and conservation status of the Prosopis flexuosa woodlands in the Bolson de Fiambala (Catamarca).	Boletin de la Sociedad Argentina de Botanica	50	2	193-208		Los Nacimientos	-27.458579	-67.600780	Argentina	Ecology	Structure, distribution and conservation status of the Prosopis flexuosa woodlands. Knowledge of dryland forests is incomplete but needed for conservation and controlled use of these resources.	Woodland units were identified by supervised classification of images. Population studies were performed, allometric variables were measured and applied traditional dendrochronological techniques	Two woodland types were distinguished: dense forest with greatest total coverage (39%) and sparse forest (21%).					MF
Argentina & Oasis	Alvarez et al (2015)	JUAN A. ALVAREZ, PABLO E. VILLAGRA, ERICA M. CESCA, FACUNDO ROJAS, SILVIA DELGADO	2015	Structure, distribution and conservation status of the Prosopis flexuosa woodlands in the Bolson de Fiambala (Catamarca).	Boletin de la Sociedad Argentina de Botanica	50	2	193-208		Anillaco	-27.921146	-67.614194	Argentina	Ecology	Structure, distribution and conservation status of the Prosopis flexuosa woodlands. Knowledge of dryland forests is incomplete but needed for conservation and controlled use of these resources.	Woodland units were identified by supervised classification of images. Population studies were performed, allometric variables were measured and applied traditional dendrochronological techniques	Two woodland types were distinguished: dense forest with greatest total coverage (39%) and sparse forest (21%).					MF
Argentina & Oasis	Balter et al (2016)	Julieta Balter, Carolina Ganema, Carlos Discoli	2016	On high-rise residential buildings in an oasis-city: Thermal and Eenergy assessment of different envelope materiality above and below tree canopy	Energy and Buildings	113		61-73	10.1016/j.enbuild.2015.11.011	Mendoza	-33.010556	-68.874444	Argentina	Environment	Thermal and energy comparison for massive and light buildings: above/below treetops.	Measurements taken in real apartments with and without resident behavior.	Indoor temperatures below tree canopy are closer to comfort ranges (2 °C difference). Lower demand for HVAC below the tree canopy. Higher consumption for light buildings in summer and for massive buildings in winter.					MF
Argentina & Oasis	Belén Ciacci et al (2022)	María Belén Ciacci, Norma Guadalupe Micheloud, Mauro Roberto Silvestre Levy, Marianela Rodriguez, Norberto Francisco Gariglio, Silvia Imhof	2022	Advantages of Seeding Annual and Perennial Cover Crops Between Peach Rows	Journal of Soil Science and Plant Nutrition	22	4	1-10	10.1007/s42729-022-01074-6	San Rafael	-34.624777	-68.188549	Argentina	Agriculture	Quantify the effects of different cover crops seeded between the peach trees rows on the soil properties and water.	Treatments were control (CT), lucerne cover crop (LT), and a mixture of common vetch and oat	Seeding cover crops between the rows of peach trees is a very useful alternative for semi-arid areas to improve the use of water and nutrients by fruit trees					MF
Argentina & Oasis	Breuste (2013)	Jürgen H. Breuste	2013	Investigations of the urban street tree forest of Mendoza, Argentina	Urban Ecosyst (2013) 16:801	16		801-818	10.1007/s11252-012-0255-2	Mendoza	-33.010556	-68.874444	Argentina	Ecology	Investigation of the urban street trees	Analysis of 1,680 urban street trees in their structure, species, age, and spatial structure, vitality and irrigation conditions	Insufficient maintenance of the trees (composition, aging, irrigation, pruning etc.) and damaged irrigation system with leads to a loss of vitality.					MF
Argentina & Oasis	Flores Marco (2010)	Noelia Flores Marco, Jorge Silva Colomer, Renée Alicia Anschau, Stella Carballo, Jorge Antonio Hilbert	2010	Analysis of the potential production and the development of bioenergy in the province of Mendoza – Bio-fuels and biomass – Using geographic information systems	International journal of hydrogen energy	35		5766-5771	10.1016/j.ijhydene.2010.02.102	Mendoza	-33.010556	-68.874444	Argentina	Agriculture	Study of the potential production and the development of the bio-energetic crops	Digitalization of information from different institutes and the geographic analysis of the data	Production of bio-fuels and the utilization of the biomass coming from the agriculture activities and the agroindustry could assist the access to the energy in the rural areas, stimulating the economical improvement.					MF
Argentina & Oasis	Giordano et al (2011)	Carla V. Giordano, Aranzazú Guevara, Hernán E. Boccalandro, Carmen Sartor, Pablo E. Villagra	2011	Water status, drought responses, and growth of Prosopis flexuosa trees with different access to the water table in a warm South American desert	Plant Ecol	212		1123-1134	10.1007/s11258-010-9892-9	Mendoza	-33.010556	-68.874444	Argentina	Ecology	Ecophysiological response of Prosopis flexuosa tree populations with decreasing access to the water table: valley adult trees, valley saplings, and dune adult trees	Evaluation of ecophysiological responses.	The combination of phreatophytism and drought tolerance would enlarge P.flexuosa habitats and buffer populations against changes in rainfall dynamics and water table depth.					MF
Argentina & Oasis	Gomez et al (2021)	Laura Gomez, Amilca rAlvarez, Sabina D'Ambrosio, Gualberto Zalazar, Ramon Aravenac	2021	Use of isotopes techniques to reveal the origin of water salinity in an arid region of Central-Western Argentina	Science of the Total Environment	763		1-14	10.1016/j.scitotenv.2020.142935	Mendoza	-33.010556	-68.874444	Argentina	Hydrology	The increasing groundwater salinity has created long-running legal conflicts between water users in drylands.	Hydrogeological, chemical and isotope tools were used to evaluate the source of groundwater salinity in Carrizal sub-basin.	Andean Rivers, with snow and ice-melt regime, are the main source of ground-water recharge. The increased groundwater salinity is related to water input from irrigations return flows in agriculture areas.					MF
Argentina & Oasis	Gomez et al (2022)	Maria Laura Gomez, G. Hoke, S. D’Ambrosio, S. Moreiras, A. Castro	2022	Review: Hydrogeology of Northern Mendoza (Argentina), from the Andes to the eastern plains, in the context of climate change	Hydrogeology Journal	30		725-750	10.1007/s10040-022-02462-z	Mendoza	-33.010556	-68.874444	Argentina	Ecology	Synthesizes of hydrogeological knowledge of Northern Mendoza, from the Andes to the eastern plains in the context of climate change.	Analysis of hydrogeological information (published and unpublished) from 1974 to 2020	Ooor current groundwater knowledge. Improvement in the understanding of groundwater, professionalization of its management, and incorporation of technological advances in hydrogeology issues and water uses are needed.					MF
Argentina & Oasis	Lavie et al (2013)	ÉMILIE LAVIE, RICHARD LAGANIER, JOSÉ ANTONIO MORÁBITO, SANTA ESMERALDA SALATINO, ROSA MEDINA DE DIAS, SUSANA MIRALLES & ROCIO HERNÁNDEZ	2013	IMPACT OF HYDRAULIC STRUCTURES AND WATER USE ON SOLIDS IN WATER IN THE ANDEAN ARGENTINIAN PIEDMONT: CASE STUDIES OF TUNUYAN AND MENDOZA RIVER VALLEYS	Geogr. Fis. Dinam. Quat.	36		119-130	10.4461/GFDQ.2013.36.9	Mendoza	-33.010556	-68.874444	Argentina	Agriculture	Evaluation of quantitative and qualitative variations of dissolved and suspended solids in water flows.	2 strategically-selected sampling points (6 in each basin) were studied.	Rivers and irrigation canals exhibit a good physical quality (turbidity and salinity). However, the combination of a possible quantitative decrease in supply, an inadequate maintenance of the hydraulic structures, and the negative impact of anthropogenic pollution requires permanent monitoring.					MF
Argentina & Oasis	Lavie et al (2013)	ÉMILIE LAVIE, RICHARD LAGANIER, JOSÉ ANTONIO MORÁBITO, SANTA ESMERALDA SALATINO, ROSA MEDINA DE DIAS, SUSANA MIRALLES & ROCIO HERNÁNDEZ	2013	IMPACT OF HYDRAULIC STRUCTURES AND WATER USE ON SOLIDS IN WATER IN THE ANDEAN ARGENTINIAN PIEDMONT: CASE STUDIES OF TUNUYAN AND MENDOZA RIVER VALLEYS	Geogr. Fis. Dinam. Quat.	36		119-130	10.4461/GFDQ.2013.36.9	Malargue	-35.460402	-69.589798	Argentina	Agriculture	Evaluation of quantitative and qualitative variations of dissolved and suspended solids in water flows.	2 strategically-selected sampling points (6 in each basin) were studied.	Rivers and irrigation canals exhibit a good physical quality (turbidity and salinity). However, the combination of a possible quantitative decrease in supply, an inadequate maintenance of the hydraulic structures, and the negative impact of anthropogenic pollution requires permanent monitoring.					MF
Argentina & Oasis	Lavie et al (2013)	ÉMILIE LAVIE, RICHARD LAGANIER, JOSÉ ANTONIO MORÁBITO, SANTA ESMERALDA SALATINO, ROSA MEDINA DE DIAS, SUSANA MIRALLES & ROCIO HERNÁNDEZ	2013	IMPACT OF HYDRAULIC STRUCTURES AND WATER USE ON SOLIDS IN WATER IN THE ANDEAN ARGENTINIAN PIEDMONT: CASE STUDIES OF TUNUYAN AND MENDOZA RIVER VALLEYS	Geogr. Fis. Dinam. Quat.	36		119-130	10.4461/GFDQ.2013.36.9	San Juan	-31.639640	-68.487228	Argentina	Agriculture	Evaluation of quantitative and qualitative variations of dissolved and suspended solids in water flows.	2 strategically-selected sampling points (6 in each basin) were studied.	Rivers and irrigation canals exhibit a good physical quality (turbidity and salinity). However, the combination of a possible quantitative decrease in supply, an inadequate maintenance of the hydraulic structures, and the negative impact of anthropogenic pollution requires permanent monitoring.					MF
Argentina & Oasis	Lavie et al (2013)	ÉMILIE LAVIE, RICHARD LAGANIER, JOSÉ ANTONIO MORÁBITO, SANTA ESMERALDA SALATINO, ROSA MEDINA DE DIAS, SUSANA MIRALLES & ROCIO HERNÁNDEZ	2013	IMPACT OF HYDRAULIC STRUCTURES AND WATER USE ON SOLIDS IN WATER IN THE ANDEAN ARGENTINIAN PIEDMONT: CASE STUDIES OF TUNUYAN AND MENDOZA RIVER VALLEYS	Geogr. Fis. Dinam. Quat.	36		119-130	10.4461/GFDQ.2013.36.9	San Rafael	-34.624777	-68.188549	Argentina	Agriculture	Evaluation of quantitative and qualitative variations of dissolved and suspended solids in water flows.	2 strategically-selected sampling points (6 in each basin) were studied.	Rivers and irrigation canals exhibit a good physical quality (turbidity and salinity). However, the combination of a possible quantitative decrease in supply, an inadequate maintenance of the hydraulic structures, and the negative impact of anthropogenic pollution requires permanent monitoring.					MF
Argentina & Oasis	Lavie et al (2013)	ÉMILIE LAVIE, RICHARD LAGANIER, JOSÉ ANTONIO MORÁBITO, SANTA ESMERALDA SALATINO, ROSA MEDINA DE DIAS, SUSANA MIRALLES & ROCIO HERNÁNDEZ	2013	IMPACT OF HYDRAULIC STRUCTURES AND WATER USE ON SOLIDS IN WATER IN THE ANDEAN ARGENTINIAN PIEDMONT: CASE STUDIES OF TUNUYAN AND MENDOZA RIVER VALLEYS	Geogr. Fis. Dinam. Quat.	36		119-130	10.4461/GFDQ.2013.36.9	Tunuyán	-33.563600	-69.020000	Argentina	Agriculture	Evaluation of quantitative and qualitative variations of dissolved and suspended solids in water flows.	2 strategically-selected sampling points (6 in each basin) were studied.	Rivers and irrigation canals exhibit a good physical quality (turbidity and salinity). However, the combination of a possible quantitative decrease in supply, an inadequate maintenance of the hydraulic structures, and the negative impact of anthropogenic pollution requires permanent monitoring.					MF
Argentina & Oasis	Lavie et al (2013)	ÉMILIE LAVIE, RICHARD LAGANIER, JOSÉ ANTONIO MORÁBITO, SANTA ESMERALDA SALATINO, ROSA MEDINA DE DIAS, SUSANA MIRALLES & ROCIO HERNÁNDEZ	2013	IMPACT OF HYDRAULIC STRUCTURES AND WATER USE ON SOLIDS IN WATER IN THE ANDEAN ARGENTINIAN PIEDMONT: CASE STUDIES OF TUNUYAN AND MENDOZA RIVER VALLEYS	Geogr. Fis. Dinam. Quat.	36		119-130	10.4461/GFDQ.2013.36.9	San Martin	-33.084289	-68.443331	Argentina	Agriculture	Evaluation of quantitative and qualitative variations of dissolved and suspended solids in water flows.	2 strategically-selected sampling points (6 in each basin) were studied.	Rivers and irrigation canals exhibit a good physical quality (turbidity and salinity). However, the combination of a possible quantitative decrease in supply, an inadequate maintenance of the hydraulic structures, and the negative impact of anthropogenic pollution requires permanent monitoring.					MF
Argentina & Oasis	Massone et al (2016)	Hector Massone, Daniel Martinez, Alberto Vich, Mauricio Quiroz London, Darıo Trombotto, Sebastián Grondona	2016	Snowmelt contribution to the sustainability of the irrigated Mendoza’s Oasis, Argentina: an isotope study	Environ Earth Sci	75		519-530	10.1007/s12665-015-5141-9	Mendoza	-33.010556	-68.874444	Argentina	Hydrology	Water resources in the Mendoza area depend mainly on snowmelt and glacier melting in the closed Andes Mountain	Characterization of stable isotopes in surface and groundwater, ice and snowmelt; 157 samples of the Blanco River Basin using a Los Gatos DLT-100 analyzer	The results indicate the importance of geology in determining stream water composition, which is integrated with isotopic data to achieve a better comprehension of the hydrological system.					MF
Argentina & Oasis	McRostie et al (2022)	Virginia McRostie, Pilar Babot, Elisa Calás, Eugenia Gayó, Francisco Gallardo, Carolina Godoy-Aguirre, Rafael Labarca, Claudio Latorre, Lautaro Núñez, Karla Ojeda, Calogero M Santoro and Daniela Valenzuela	2022	Silvopastoralism and the shaping of forest patches in the Atacama Desert during the Formative Period (ca. 3000–1500yearsBP)	The Holocene	32	12	1492-1503	10.1177/09596836221122636	Quillagua	-21.654095	-69.538513	Chile	Palaeontology	Silvopastoralism and the shaping of forest patches in the Atacama Desert	Analysis of 34 pellets recovered from seven archeological sites.	Camelids were foraging for Prosopis, although, these herbivores might not have been the main vectors for the spread and germination of algarrobos					MF
Argentina & Oasis	Morabito et al (2007)	Jos Morabito, Santa Salatin, Rosa Medina, Mnica Zimmermann, María Flavia Filippini, Adriana Bermejillo, Susana Campos, Norma Nacif, Cora Dediol, Dora Genovese, Pablo Humberto Pizzuolo, Leandro Mastrantonio, Analia Valdes	2007	Irrigation water quality in the Mendoza river basin: temperature, pH, soluble and solid ions	Revista de la Facultad de Ciencias Agrarias	39	1	9-20		Mendoza	-33.010556	-68.874444	Argentina	Hydrology	Analysis of the evolution of water quality in the basin	Analysis of dainage system saples were tested for temperature, pH, soluble and solid ions	No differences in pH and total volatile solids were found between sampling points; however, differences were observed in the other variables.					MF
Argentina & Oasis	Ortega Justavino et al (2021)	Richard José Ortega Justavino, Pablo Fernando Loyola, Joaquín Antonio Llera Giméne	2021	Assessment of fodder corn grown under surface and subsurface drip irrigation in Mendoza, Argentina	Revista de la Facultad de Ciencias Agrarias	53	2	132-142	10.48162/rev.39.047	Mendoza	-33.010556	-68.874444	Argentina	Agriculture	Assess and compare the response of fodder corn to surface and subsurface drip irrigation	Factorial experimental design with randomized blocks and repeated measures	Dry matter after the first sowing was significantly higher in both cycles under subsurface drip irrigation. No other significant differences.					MF
Argentina & Oasis	Rebora et al (2007)	Cecilia Rebora, Luciana Gómez, Horacio Lelio, Ariel Barros	2007	Oil yield of rape grown under irrigation. Mendoza (Argentina)	Revista de la Facultad de Ciencias Agrarias	39	2	101-108		Mendoza	-33.010556	-68.874444	Argentina	Agriculture	Oil yield of rape, a winter oil-plant, was studied in the north oasis of Mendoza.	Three cultivars were tried in three sowing dates (April, May and June), during 2005 and 2006	Oil yield was over 1500 kg / ha in April and May sowings and under that value in June sowing.					MF
Argentina & Oasis	Rebora et al (2015)	Cecilia Rebora, Ariel Barros, Leandra Ibarguren, Alejandra Bertona, Carlos Antonini, Fernando Arenas	2015	Effect of different winterhardiness cultivars on alfalfa's yield grown in Northern oasis of Mendoza	Revista de la Facultad de Ciencias Agrarias	47	2	43-51		Mendoza	-33.008333	-68.875556	Argentina	Agriculture	Identification of the fall dormancy group or groups of alfalfa that have the higher yields in North oasis in Mendoza, determine the number of cuts per year per cultivar, forage quality, and cultivar persistence	A cultivar representative of each fall dormancy group (ability to grow tall in the fall) from 6 to 10 was evaluated, during two growing seasons (2012-2013 and 2013-2014).	No significant differences were found in number of cuts/year, anual dry matter production, leaves/stems ratio, and persistance between groups of fall dormancy					MF
Argentina & Oasis	Rebora et al (2018)	Cecilia Rebora, Leandra Ibarguren, Ariel Barros, Alejandra Bertona, Carlos Antonini, Fernando Arenas, Mariana Calderón, Diego Guerrero	2018	Corn silage production in the northern oasis of Mendoza, Argentina	Revista de la Facultad de Ciencias Agrarias	50	2	369-375		Mendoza	-33.010556	-68.874444	Argentina	Agriculture	Corn silage emerges as an important forage alternative for meat production during lack of feed at certain stages of the production cycle.	Three corn hybrids analysed. Green and dry matter yields and genotypes were characterized according to plant height, number of ears of corn, and the ear dry weight/whole plant dry weight ratio.	Results obtained suggest that corn silage is a valid forage resource for intensive cattle farming in Mendoza					MF
Argentina & Oasis	Ruiz & Correa (2015)	María Angelica Ruiz, Erica N. Correa	2015	Adaptive model for outdoor thermal comfort assessment in an Oasis city of arid climate	Building and Environment	85		40-51	10.1016/j.buildenv.2014.11.018	Mendoza	-33.010556	-68.874444	Argentina	Environment	A statistical model to predict thermal comfort considering adaptation was proposed.	Monitoring of microclimatic parameters and field surveys were carried out. Linear regressions were made and Akaike criterion was used to the model selection.	The “Thermal comfort Index for cities of Arid Zones (IZA)” has been developed. IZA's predictive ability is 73%, while six widely used indices show less than 25%.					MF
Argentina & Oasis	Ruiz & Correa (2018)	M. A. Ruiz, E. N. Correa	2018	Urban-forest configurations in an “oasis city” of arid zone: Mendoza (Argentina). Influence on residential energy consumption	Informes de la Construcción	70	549	1-11	10.3989/ic.16.135	Mendoza	-33.010556	-68.874444	Argentina	Ecology	A need to rethink the way of tree plantation in the city	Nine representative urban canyons were micro-climatically monitored in winter and summer and the thermal behavior was simulated.	Urban designs that control the solar radiation by means of an adequate distribution of the shade and that allow a better wind circulation, minimize the auxiliary energy consumption up to 30%					MF
Argentina & Oasis	Tozzi et al (2017)	Fabián Tozzi, Adriana Mariani, Rosana Vallone, José Morábito	2017	Salinity evolution in irrigated soils in the Lower Tunuyán River basin (Mendoza-Argentina)	Revista de la Facultad de Ciencias Agrarias	49	1	79-93		Mendoza	-33.010556	-68.874444	Argentina	Agriculture	The evolution of soil salinity on cultivated soils in the area of the Lower Tunuyán River	Measuring the electrical conductivity of the soil saturation extract. affecting factors were analized: water table levels, irrigation canal lining, rainfall, evapotranspiration and volumes derived for irrigation.	Iso-salinity curves made it possible to determine that in 49% of the superficial strata (2002) soils were moderately saline, while in 2009, 60% of the area showed that canal lining led to a reduction in salinity levels due to decreasing water tables.					MF
Argentina & Oasis	Villalba et al (2014)	Ayelén Villalba, Andrea Pattini, Erica Correa	2014	An approach to urban tree daylight permeability simulation using models based on louvers	Building and Environment	73		75-87	10.1016/j.buildenv.2013.11.026	Mendoza	-33.010556	-68.874444	Argentina	Environment	Analysis of the distributional patterns of sun radiation produced by trees on facades	Raytrace simulation of solar control system models generated with hemispherical images	Louvers model shows highest similarity to urban trees daylight behavior. Monte Carlo stochastic model is suitable for tree daylight permeability analysis. Hemispherical images as tree pattern are a simplified and highly accurate tool.					MF
Australia & Oasis	Allbed et al (2014)	Amal Allbed, Lalit Kumar and Priyakant Sinha	2014	Mapping and Modelling Spatial Variation in Soil Salinity in the Al Hassa Oasis Based on Remote Sensing Indicators and Regression Techniques	Remote Sensing	6		1137-1157	10.3390/rs6021137	Al Hassa	25.270928	49.690635	Saudi Arabia	Ecology	Spatial Variation in Soil Salinity	Remote sensing IKONOS images, statistical regression modelling	Modelling and mapping spatial variation in soil salinity is a prommising approach.					MF
Australia & Oasis	Cruz-Morales et al (2017)	Pablo Cruz-Morales, Hilda E. Ramos-Aboites, Cuauhtemoc Licona-Cassaní, Nelly Selem-Mojica, Paulina M. Mejıa-Ponce, Valeria Souza-Saldıvarand Francisco Barona-Gomez	2017	Actinobacteria phylogenomics, selective isolation from an iron oligotrophic environment and siderophore functional characterization, unveil new desferrioxamine traits	FEMS Microbiology Ecology	93		1-12	10.1093/femsec/fix086	Cuatro Cienegas	26.830443	-102.139271	Mexico	Microbiology	Desferrioxamine-centric phylogenomic analysis in six novel Actinobacteria strains isolated from an iron and phosphorous depleted oasis	phylogenomic analysis; co-cultures under iron deficiency	Insights to direct the future ecological and functional analysis of desferrioxamines in the environment.					MF
Australia & Oasis	Ma et al (2018)	Xiaohong Ma, Qi Feng, Yonghong Su, Tengfei Yu, Ravinesh C. Deo	2018	Characteristics of ecosystem water use efficiency in a desert riparian forest	Environmental Earth Sciences	77	358		10.1007/s12665-018-7518-z	Ejin	42.214243	101.092341	China	Ecology	Water–carbon process and mechanisms in the desert riparian fores	Seasonal and inter-annual variations in the gross primary productivity (GPP), evapotranspiration (ET) and ecosystem water use	Implications that enable more rational water management					MF
Australia & Oasis	Pliscoff et al (2017)	Patricio Pliscoff, Nicolás Zanetta, Josefina Hepp, Javiera Machuca	2017	Efectos sobre la flora y vegetación del evento de precipitación extremo de agosto 2015 en Alto Patache, Desierto de Atacama, Chile	Revista de Geografía Norte Grande	68		91-103		Alto Patache	-20.817666	-70.152291	Chile	Botany	Vegetation after El Nino 2015	Comparison of current presence and dominance of vegetation with historical data.	42 species identified, 78% of all known plants in the area ,with one new record( Tiquilia sp.)					MF
Australia & Oasis	Rioja et al (2021)	Tommy Rioja, Víctor Tello, Natalí Fernandez, and Ricardo Ceballos	2021	Behavioral responses of the woolly whitefly Aleurothrixus floccosus (Hemiptera: Aleyrodidae) to volatile organic compounds emitted from Citrusat laboratory conditions	CHILEAN JOURNAL OF AGRICULTURAL RESEARCH	81	4	568-574	10.4067/S0718-58392021000400568	Pica	-20.488541	-69.322310	Chile	Ecology	Attractant behavior of A. floccosus	Analysis of volatiles from living plants using dynamic headspace technique for 24 h; lab experiments.	The volatile profile of ‘Limón de Pica’,C. aurantiifolia, elicits the strongest attractive behavior of A. floccosus females in the olfactometry experiments.					MF
Australia & Oasis	Wheeler et al.	TERRY A. WHEELER & BRADLEY J. SINCLAIR		Systematics of Paraleucopis Malloch with proposal of Paraleucopidae, a new family of acalyptrate Diptera	Zootaxa	4668	3	301-328	10.11646/zootaxa.4668.3.1	Willis Palms	33.826768	-116.331065	USA	Zoology	Systematics of Paraleucopis Malloch	Systematics	A key to the species of Paraleucopis is provided. The distribution of Paraleucopis is disjunct, with six species in the western United States and northwestern Mexico and three species in northern Chile and northern Argentina. The sister group and superfamilial assignment of the Paraleucopidae cannot be established.					MF
Australia & Oasis	Wischusen et al (2003)	John D.H. Wischusen, L. Keith Fifield, Richard G. Cresswell	2003	Hydrogeology of Palm Valley, central Australia; a Pleistocene flora refuge?	Journal of Hydrology	293		20-46	10.1016/j.jhydrol.2004.01.007	Palm Valley	-24.043706	132.700285	Australia	Hydrology	How could these unique plants persist, over 1000 km away from nearest relatives?	Stable isotope analysis	Low water travel times. Possibility that Palm Valley has acted as a flora refuge since at least the mid Pleistocene.					MF
Australia & Oasis	Zeng et al (2014)	Fanjiang Zeng , Yan Lu , Bo Liu , Haifeng Guo , Jie Zeng , Ligang Zhang & Stefan K. Arndt	2014	One-Year-Old Seedling Biomass Distribution and Root Architecture Characteristics Differed Between Two Desert Plants: Tamarix ramosissima and Alhagi sparsifolia	Arid Land Research and Management	27	3	298-302	10.1080/15324982.2012.748709	Qira	37.054613	81.048899	China	Botany	two dominant species in the southern rim of the Taklamakan Desert, were investigate	A root uprooting and trench profile method were used	T. ramosissimahad more biomass in the shoots, whereas A. sparsifolia had more biomass in the roots. The root architecture of two species differed.					MF
Bolivia & Oasis	González-Rubio et al (2016)	Cristina González-Rubio, Francisco J. García-De León, Ricardo Rodríguez-Estrella	2016	Phylogeography of endemic Xantus’ hummingbird (Hylocharis xantusii) show a different history of vicariance in the Baja California Peninsula	Molecular Phylogenetics and Evolution	102		265-277	10.1016/j.ympev.2016.05.039	Santa Gertrudis	28.050077	-113.085974	Mexico	Ornitology	To understand the influence of geological or ecological processes on the phylogeography of the only species of hummingbird endemic to the Baja California Peninsula, Hylocharis xantusii,	mitochondrial DNA sequences of three concatenated genes (Cyt-b, COI and ND2; 2,297 bp in total) in 100 individuals were analyzed	The spatial analyses of genetic variation showed phylogeographic structure consisting of a north, central and south regions. According to estimated divergence times, two vicariant events are supported, permanent separation of the peninsula and formation of the Gulf of California at 5 mya and temporary isolation of the southern region at the Isthmus of La Paz at 3 mya				Hylocharis xantusii	MF
Bolivia & Oasis	González-Rubio et al (2016)	Cristina González-Rubio, Francisco J. García-De León, Ricardo Rodríguez-Estrella	2016	Phylogeography of endemic Xantus’ hummingbird (Hylocharis xantusii) show a different history of vicariance in the Baja California Peninsula	Molecular Phylogenetics and Evolution	102		265-277	10.1016/j.ympev.2016.05.039	San Ignacio Kadakaamán	27.283168	-112.902177	Mexico	Ornitology	To understand the influence of geological or ecological processes on the phylogeography of the only species of hummingbird endemic to the Baja California Peninsula, Hylocharis xantusii,	mitochondrial DNA sequences of three concatenated genes (Cyt-b, COI and ND2; 2,297 bp in total) in 100 individuals were analyzed	The spatial analyses of genetic variation showed phylogeographic structure consisting of a north, central and south regions. According to estimated divergence times, two vicariant events are supported, permanent separation of the peninsula and formation of the Gulf of California at 5 mya and temporary isolation of the southern region at the Isthmus of La Paz at 3 mya				Hylocharis xantusii	MF
Bolivia & Oasis	González-Rubio et al (2016)	Cristina González-Rubio, Francisco J. García-De León, Ricardo Rodríguez-Estrella	2016	Phylogeography of endemic Xantus’ hummingbird (Hylocharis xantusii) show a different history of vicariance in the Baja California Peninsula	Molecular Phylogenetics and Evolution	102		265-277	10.1016/j.ympev.2016.05.039	San Zacarias	27.139497	-112.905081	Mexico	Ornitology	To understand the influence of geological or ecological processes on the phylogeography of the only species of hummingbird endemic to the Baja California Peninsula, Hylocharis xantusii,	mitochondrial DNA sequences of three concatenated genes (Cyt-b, COI and ND2; 2,297 bp in total) in 100 individuals were analyzed	The spatial analyses of genetic variation showed phylogeographic structure consisting of a north, central and south regions. According to estimated divergence times, two vicariant events are supported, permanent separation of the peninsula and formation of the Gulf of California at 5 mya and temporary isolation of the southern region at the Isthmus of La Paz at 3 mya				Hylocharis xantusii	MF
Bolivia & Oasis	González-Rubio et al (2016)	Cristina González-Rubio, Francisco J. García-De León, Ricardo Rodríguez-Estrella	2016	Phylogeography of endemic Xantus’ hummingbird (Hylocharis xantusii) show a different history of vicariance in the Baja California Peninsula	Molecular Phylogenetics and Evolution	102		265-277	10.1016/j.ympev.2016.05.039	San José de Magdalena	27.062531	-112.234558	Mexico	Ornitology	To understand the influence of geological or ecological processes on the phylogeography of the only species of hummingbird endemic to the Baja California Peninsula, Hylocharis xantusii,	mitochondrial DNA sequences of three concatenated genes (Cyt-b, COI and ND2; 2,297 bp in total) in 100 individuals were analyzed	The spatial analyses of genetic variation showed phylogeographic structure consisting of a north, central and south regions. According to estimated divergence times, two vicariant events are supported, permanent separation of the peninsula and formation of the Gulf of California at 5 mya and temporary isolation of the southern region at the Isthmus of La Paz at 3 mya				Hylocharis xantusii	MF
Bolivia & Oasis	González-Rubio et al (2016)	Cristina González-Rubio, Francisco J. García-De León, Ricardo Rodríguez-Estrella	2016	Phylogeography of endemic Xantus’ hummingbird (Hylocharis xantusii) show a different history of vicariance in the Baja California Peninsula	Molecular Phylogenetics and Evolution	102		265-277	10.1016/j.ympev.2016.05.039	San Nicolás	26.545619	-111.552447	Mexico	Ornitology	To understand the influence of geological or ecological processes on the phylogeography of the only species of hummingbird endemic to the Baja California Peninsula, Hylocharis xantusii,	mitochondrial DNA sequences of three concatenated genes (Cyt-b, COI and ND2; 2,297 bp in total) in 100 individuals were analyzed	The spatial analyses of genetic variation showed phylogeographic structure consisting of a north, central and south regions. According to estimated divergence times, two vicariant events are supported, permanent separation of the peninsula and formation of the Gulf of California at 5 mya and temporary isolation of the southern region at the Isthmus of La Paz at 3 mya				Hylocharis xantusii	MF
Bolivia & Oasis	González-Rubio et al (2016)	Cristina González-Rubio, Francisco J. García-De León, Ricardo Rodríguez-Estrella	2016	Phylogeography of endemic Xantus’ hummingbird (Hylocharis xantusii) show a different history of vicariance in the Baja California Peninsula	Molecular Phylogenetics and Evolution	102		265-277	10.1016/j.ympev.2016.05.039	Carambuche	26.219097	-112.020658	Mexico	Ornitology	To understand the influence of geological or ecological processes on the phylogeography of the only species of hummingbird endemic to the Baja California Peninsula, Hylocharis xantusii,	mitochondrial DNA sequences of three concatenated genes (Cyt-b, COI and ND2; 2,297 bp in total) in 100 individuals were analyzed	The spatial analyses of genetic variation showed phylogeographic structure consisting of a north, central and south regions. According to estimated divergence times, two vicariant events are supported, permanent separation of the peninsula and formation of the Gulf of California at 5 mya and temporary isolation of the southern region at the Isthmus of La Paz at 3 mya				Hylocharis xantusii	MF
Bolivia & Oasis	González-Rubio et al (2016)	Cristina González-Rubio, Francisco J. García-De León, Ricardo Rodríguez-Estrella	2016	Phylogeography of endemic Xantus’ hummingbird (Hylocharis xantusii) show a different history of vicariance in the Baja California Peninsula	Molecular Phylogenetics and Evolution	102		265-277	10.1016/j.ympev.2016.05.039	La Purísima Concepcioón	26.199131	-112.050468	Mexico	Ornitology	To understand the influence of geological or ecological processes on the phylogeography of the only species of hummingbird endemic to the Baja California Peninsula, Hylocharis xantusii,	mitochondrial DNA sequences of three concatenated genes (Cyt-b, COI and ND2; 2,297 bp in total) in 100 individuals were analyzed	The spatial analyses of genetic variation showed phylogeographic structure consisting of a north, central and south regions. According to estimated divergence times, two vicariant events are supported, permanent separation of the peninsula and formation of the Gulf of California at 5 mya and temporary isolation of the southern region at the Isthmus of La Paz at 3 mya				Hylocharis xantusii	MF
Bolivia & Oasis	González-Rubio et al (2016)	Cristina González-Rubio, Francisco J. García-De León, Ricardo Rodríguez-Estrella	2016	Phylogeography of endemic Xantus’ hummingbird (Hylocharis xantusii) show a different history of vicariance in the Baja California Peninsula	Molecular Phylogenetics and Evolution	102		265-277	10.1016/j.ympev.2016.05.039	Comondú	26.060627	-111.821746	Mexico	Ornitology	To understand the influence of geological or ecological processes on the phylogeography of the only species of hummingbird endemic to the Baja California Peninsula, Hylocharis xantusii,	mitochondrial DNA sequences of three concatenated genes (Cyt-b, COI and ND2; 2,297 bp in total) in 100 individuals were analyzed	The spatial analyses of genetic variation showed phylogeographic structure consisting of a north, central and south regions. According to estimated divergence times, two vicariant events are supported, permanent separation of the peninsula and formation of the Gulf of California at 5 mya and temporary isolation of the southern region at the Isthmus of La Paz at 3 mya				Hylocharis xantusii	MF
Bolivia & Oasis	González-Rubio et al (2016)	Cristina González-Rubio, Francisco J. García-De León, Ricardo Rodríguez-Estrella	2016	Phylogeography of endemic Xantus’ hummingbird (Hylocharis xantusii) show a different history of vicariance in the Baja California Peninsula	Molecular Phylogenetics and Evolution	102		265-277	10.1016/j.ympev.2016.05.039	San Miguel de Comondú	26.036714	-111.832832	Mexico	Ornitology	To understand the influence of geological or ecological processes on the phylogeography of the only species of hummingbird endemic to the Baja California Peninsula, Hylocharis xantusii,	mitochondrial DNA sequences of three concatenated genes (Cyt-b, COI and ND2; 2,297 bp in total) in 100 individuals were analyzed	The spatial analyses of genetic variation showed phylogeographic structure consisting of a north, central and south regions. According to estimated divergence times, two vicariant events are supported, permanent separation of the peninsula and formation of the Gulf of California at 5 mya and temporary isolation of the southern region at the Isthmus of La Paz at 3 mya				Hylocharis xantusii	MF
Bolivia & Oasis	González-Rubio et al (2016)	Cristina González-Rubio, Francisco J. García-De León, Ricardo Rodríguez-Estrella	2016	Phylogeography of endemic Xantus’ hummingbird (Hylocharis xantusii) show a different history of vicariance in the Baja California Peninsula	Molecular Phylogenetics and Evolution	102		265-277	10.1016/j.ympev.2016.05.039	Misión San Javier	25.857915	-111.546542	Mexico	Ornitology	To understand the influence of geological or ecological processes on the phylogeography of the only species of hummingbird endemic to the Baja California Peninsula, Hylocharis xantusii,	mitochondrial DNA sequences of three concatenated genes (Cyt-b, COI and ND2; 2,297 bp in total) in 100 individuals were analyzed	The spatial analyses of genetic variation showed phylogeographic structure consisting of a north, central and south regions. According to estimated divergence times, two vicariant events are supported, permanent separation of the peninsula and formation of the Gulf of California at 5 mya and temporary isolation of the southern region at the Isthmus of La Paz at 3 mya				Hylocharis xantusii	MF
Bolivia & Oasis	González-Rubio et al (2016)	Cristina González-Rubio, Francisco J. García-De León, Ricardo Rodríguez-Estrella	2016	Phylogeography of endemic Xantus’ hummingbird (Hylocharis xantusii) show a different history of vicariance in the Baja California Peninsula	Molecular Phylogenetics and Evolution	102		265-277	10.1016/j.ympev.2016.05.039	La Soledad	24.812253	-110.813978	Mexico	Ornitology	To understand the influence of geological or ecological processes on the phylogeography of the only species of hummingbird endemic to the Baja California Peninsula, Hylocharis xantusii,	mitochondrial DNA sequences of three concatenated genes (Cyt-b, COI and ND2; 2,297 bp in total) in 100 individuals were analyzed	The spatial analyses of genetic variation showed phylogeographic structure consisting of a north, central and south regions. According to estimated divergence times, two vicariant events are supported, permanent separation of the peninsula and formation of the Gulf of California at 5 mya and temporary isolation of the southern region at the Isthmus of La Paz at 3 mya				Hylocharis xantusii	MF
Chad & Oasis	Creutz et al (2016)	Mike Creutz, Bert Van Bocxlaer, Moussa Abderamane, Dirk Verschuren	2016	Recent environmental history of the desert oasis lakes at Ounianga Serir, Chad	Journal of Paleolimnology	55		167-183	10.1007/s10933-015-9874-y	Edem	18.923969	20.842069	Chad	Paleontology	we analyze the lithostratigraphy, charcoal, and fossil mollusks in short, dated sediment cores from three of these lakes (Edem, Hogou, and Agouta) to assess the hydrological and environmental stability of these unique aquatic ecosystems over the last few centuries	Chemical analysis	Our results indicate that the studied lakes remained relatively stable and fresh over the past 200–600 years, confirming the dominant and constant nature of groundwater input, preventing desiccation.					JAHA
Chad & Oasis	Creutz et al (2016)	Mike Creutz, Bert Van Bocxlaer, Moussa Abderamane, Dirk Verschuren	2017	Recent environmental history of the desert oasis lakes at Ounianga Serir, Chad	Journal of Paleolimnology	56		167-184	10.1007/s10933-015-9874-y	Teil	18.919427	20.866352	Chad	Paleontology	we analyze the lithostratigraphy, charcoal, and fossil mollusks in short, dated sediment cores from three of these lakes (Edem, Hogou, and Agouta) to assess the hydrological and environmental stability of these unique aquatic ecosystems over the last few centuries	Chemical analysis	Our results indicate that the studied lakes remained relatively stable and fresh over the past 200–600 years, confirming the dominant and constant nature of groundwater input, preventing desiccation.					JAHA
Chad & Oasis	Creutz et al (2016)	Mike Creutz, Bert Van Bocxlaer, Moussa Abderamane, Dirk Verschuren	2018	Recent environmental history of the desert oasis lakes at Ounianga Serir, Chad	Journal of Paleolimnology	57		167-185	10.1007/s10933-015-9874-y	Agouta	18.920454	20.878770	Chad	Paleontology	we analyze the lithostratigraphy, charcoal, and fossil mollusks in short, dated sediment cores from three of these lakes (Edem, Hogou, and Agouta) to assess the hydrological and environmental stability of these unique aquatic ecosystems over the last few centuries	Chemical analysis	Our results indicate that the studied lakes remained relatively stable and fresh over the past 200–600 years, confirming the dominant and constant nature of groundwater input, preventing desiccation.					JAHA
Chad & Oasis	Creutz et al (2016)	Mike Creutz, Bert Van Bocxlaer, Moussa Abderamane, Dirk Verschuren	2019	Recent environmental history of the desert oasis lakes at Ounianga Serir, Chad	Journal of Paleolimnology	58		167-186	10.1007/s10933-015-9874-y	Hogou	18.917929	20.884833	Chad	Paleontology	we analyze the lithostratigraphy, charcoal, and fossil mollusks in short, dated sediment cores from three of these lakes (Edem, Hogou, and Agouta) to assess the hydrological and environmental stability of these unique aquatic ecosystems over the last few centuries	Chemical analysis	Our results indicate that the studied lakes remained relatively stable and fresh over the past 200–600 years, confirming the dominant and constant nature of groundwater input, preventing desiccation.					JAHA
Chad & Oasis	Creutz et al (2016)	Mike Creutz, Bert Van Bocxlaer, Moussa Abderamane, Dirk Verschuren	2020	Recent environmental history of the desert oasis lakes at Ounianga Serir, Chad	Journal of Paleolimnology	59		167-187	10.1007/s10933-015-9874-y	Djara	18.915758	20.891692	Chad	Paleontology	we analyze the lithostratigraphy, charcoal, and fossil mollusks in short, dated sediment cores from three of these lakes (Edem, Hogou, and Agouta) to assess the hydrological and environmental stability of these unique aquatic ecosystems over the last few centuries	Chemical analysis	Our results indicate that the studied lakes remained relatively stable and fresh over the past 200–600 years, confirming the dominant and constant nature of groundwater input, preventing desiccation.					JAHA
Chad & Oasis	Creutz et al (2016)	Mike Creutz, Bert Van Bocxlaer, Moussa Abderamane, Dirk Verschuren	2021	Recent environmental history of the desert oasis lakes at Ounianga Serir, Chad	Journal of Paleolimnology	60		167-188	10.1007/s10933-015-9874-y	Bedrim	18.914349	20.901179	Chad	Paleontology	we analyze the lithostratigraphy, charcoal, and fossil mollusks in short, dated sediment cores from three of these lakes (Edem, Hogou, and Agouta) to assess the hydrological and environmental stability of these unique aquatic ecosystems over the last few centuries	Chemical analysis	Our results indicate that the studied lakes remained relatively stable and fresh over the past 200–600 years, confirming the dominant and constant nature of groundwater input, preventing desiccation.					JAHA
Chad & Oasis	Creutz et al (2016)	Mike Creutz, Bert Van Bocxlaer, Moussa Abderamane, Dirk Verschuren	2022	Recent environmental history of the desert oasis lakes at Ounianga Serir, Chad	Journal of Paleolimnology	61		167-189	10.1007/s10933-015-9874-y	Boku	18.910420	20.908073	Chad	Paleontology	we analyze the lithostratigraphy, charcoal, and fossil mollusks in short, dated sediment cores from three of these lakes (Edem, Hogou, and Agouta) to assess the hydrological and environmental stability of these unique aquatic ecosystems over the last few centuries	Chemical analysis	Our results indicate that the studied lakes remained relatively stable and fresh over the past 200–600 years, confirming the dominant and constant nature of groundwater input, preventing desiccation.					JAHA
Chad & Oasis	Eggermont et al (2008)	Hilde Eggermont, Dirk Verschuren, Maureen Fagot, Bob Rumes, Bert Van Bocxlaer, Stefan Kropelin	2008	Aquatic community response in a groundwater-fed desert lake to Holocene desiccation of the Sahara	Quaternary Science Reviews	27		2411-2425	10.1016/j.quascirev.2008.08.028	Yoa	19.044753	20.494220	Chad	Paleontology	we reconstruct long-term changes in zoobenthos and zooplankton communities of Lake Yoa as their early-Holocene freshwater habitat changed into the hypersaline conditions prevailing today	Paleontology	Chironomid production peaked during the fresh-to-saline transition period, then stabilized at about half that of the earlier freshwater ecosystem. Quantitative salinity inferences based on fossil chironomid assemblages indicate that the fresh-to-saline transition occurred fairly abruptly between w4100 and 3400 cal yr BP, but that the ecosystem was buffered against shorter-term climate fluctuation…					JAHA
Chad & Oasis	Eggermont et al (2008)	Hilde Eggermont, Dirk Verschuren, Maureen Fagot, Bob Rumes, Bert Van Bocxlaer, Stefan Kropelin	2008	Aquatic community response in a groundwater-fed desert lake to Holocene desiccation of the Sahara	Quaternary Science Reviews	27		2411-2425	10.1016/j.quascirev.2008.08.028	Uma	19.011183	20.512144	Chad	Paleontology	we reconstruct long-term changes in zoobenthos and zooplankton communities of Lake Yoa as their early-Holocene freshwater habitat changed into the hypersaline conditions prevailing today	Paleontology	Chironomid production peaked during the fresh-to-saline transition period, then stabilized at about half that of the earlier freshwater ecosystem. Quantitative salinity inferences based on fossil chironomid assemblages indicate that the fresh-to-saline transition occurred fairly abruptly between w4100 and 3400 cal yr BP, but that the ecosystem was buffered against shorter-term climate fluctuation…					JAHA
Chad & Oasis	Eggermont et al (2008)	Hilde Eggermont, Dirk Verschuren, Maureen Fagot, Bob Rumes, Bert Van Bocxlaer, Stefan Kropelin	2008	Aquatic community response in a groundwater-fed desert lake to Holocene desiccation of the Sahara	Quaternary Science Reviews	27		2411-2425	10.1016/j.quascirev.2008.08.028	Mioji	19.009217	20.533286	Chad	Paleontology	we reconstruct long-term changes in zoobenthos and zooplankton communities of Lake Yoa as their early-Holocene freshwater habitat changed into the hypersaline conditions prevailing today	Paleontology	Chironomid production peaked during the fresh-to-saline transition period, then stabilized at about half that of the earlier freshwater ecosystem. Quantitative salinity inferences based on fossil chironomid assemblages indicate that the fresh-to-saline transition occurred fairly abruptly between w4100 and 3400 cal yr BP, but that the ecosystem was buffered against shorter-term climate fluctuation…					JAHA
Chad & Oasis	Eggermont et al (2008)	Hilde Eggermont, Dirk Verschuren, Maureen Fagot, Bob Rumes, Bert Van Bocxlaer, Stefan Kropelin	2008	Aquatic community response in a groundwater-fed desert lake to Holocene desiccation of the Sahara	Quaternary Science Reviews	27		2411-2425	10.1016/j.quascirev.2008.08.028	Forodone	19.004485	20.537403	Chad	Paleontology	we reconstruct long-term changes in zoobenthos and zooplankton communities of Lake Yoa as their early-Holocene freshwater habitat changed into the hypersaline conditions prevailing today	Paleontology	Chironomid production peaked during the fresh-to-saline transition period, then stabilized at about half that of the earlier freshwater ecosystem. Quantitative salinity inferences based on fossil chironomid assemblages indicate that the fresh-to-saline transition occurred fairly abruptly between w4100 and 3400 cal yr BP, but that the ecosystem was buffered against shorter-term climate fluctuation…					JAHA
Chad & Oasis	Van der Meeren et al (2022)	Thijs Van der Meeren, Dirk Verschuren, Florence Sylvestre, Yacoub A. Nassour, Evi L. Naudts, Luis E. Aguilar Ortiz, Pierre Deschamps, Kazuyo Tachikawa, Edouard Bard, Mathieu Schuster, Moussa Abderamane	2022	A predominantly tropical influence on late Holocene hydroclimate variation in the hyperarid central Sahara	Science Advances	8	14	1-10	10.1126/sciadv.abk126	Teil	18.919427	20.866352	Chad	Climate	A new lake sediment record from Ounianga Serir oasis in northern Chad, spanning the Late Holocene without interruption, confirms that immediately before ca 4200 years ago, the Sahara experienced an episode of hyperaridity even more extreme than today’s desert climate.	Review	Our in-lake geochemical proxies show that, during the last 3000 years, century-scale hydroclimate variation in the central Sahara primarily tracked the intensity of the tropical West African monsoon, modulated at shorter time scales by weather patterns linked to shifts in midlatitude Atlantic Ocean circulation					JAHA
Chile & Oasis	Bessega et al (2021)	Cecilia Bessega, Carolina Pometti, Reneé Fortunato, Francisca Greene, Calogero M. Santoro, Virginia McRostie	2021	Genetic studies of various Prosopis species (Leguminosae, Section Algarobia ) co-occurring in oases of the Atacama Desert (northern Chile)	Ecology and Evolution.	11		2375–2390	10.1002/ece3.7212	Tiliviche	-19.553080	-69.953750	Chile	Genetics	assess the genetic diversity and the degree of differentiation among groups of Prosopis	Thirteen populations were sampled from oases located on three hydrographic basins and genotyped.	Both natural and non-natural (humans) dispersal agents that may be moving Prosopisin the AtacamaDesert.					MF
Chile & Oasis	Bessega et al (2021)	Cecilia Bessega, Carolina Pometti, Reneé Fortunato, Francisca Greene, Calogero M. Santoro, Virginia McRostie	2021	Genetic studies of various Prosopis species (Leguminosae, Section Algarobia ) co-occurring in oases of the Atacama Desert (northern Chile)	Ecology and Evolution.	11		2375–2390	10.1002/ece3.7212	Zapiga	-19.645922	-69.950183	Chile	Genetics	assess the genetic diversity and the degree of differentiation among groups of Prosopis	Thirteen populations were sampled from oases located on three hydrographic basins and genotyped.	Both natural and non-natural (humans) dispersal agents that may be moving Prosopisin the AtacamaDesert.					MF
Chile & Oasis	Bessega et al (2021)	Cecilia Bessega, Carolina Pometti, Reneé Fortunato, Francisca Greene, Calogero M. Santoro, Virginia McRostie	2021	Genetic studies of various Prosopis species (Leguminosae, Section Algarobia ) co-occurring in oases of the Atacama Desert (northern Chile)	Ecology and Evolution.	11		2375–2390	10.1002/ece3.7212	Tarapacá	-19.901450	-69.483970	Chile	Genetics	assess the genetic diversity and the degree of differentiation among groups of Prosopis	Thirteen populations were sampled from oases located on three hydrographic basins and genotyped.	Both natural and non-natural (humans) dispersal agents that may be moving Prosopisin the AtacamaDesert.					MF
Chile & Oasis	Bessega et al (2021)	Cecilia Bessega, Carolina Pometti, Reneé Fortunato, Francisca Greene, Calogero M. Santoro, Virginia McRostie	2021	Genetic studies of various Prosopis species (Leguminosae, Section Algarobia ) co-occurring in oases of the Atacama Desert (northern Chile)	Ecology and Evolution.	11		2375–2390	10.1002/ece3.7212	Canchones	-20.434960	-69.533400	Chile	Genetics	assess the genetic diversity and the degree of differentiation among groups of Prosopis	Thirteen populations were sampled from oases located on three hydrographic basins and genotyped.	Both natural and non-natural (humans) dispersal agents that may be moving Prosopisin the AtacamaDesert.					MF
Chile & Oasis	Bessega et al (2021)	Cecilia Bessega, Carolina Pometti, Reneé Fortunato, Francisca Greene, Calogero M. Santoro, Virginia McRostie	2021	Genetic studies of various Prosopis species (Leguminosae, Section Algarobia ) co-occurring in oases of the Atacama Desert (northern Chile)	Ecology and Evolution.	11		2375–2390	10.1002/ece3.7212	Victoria Viejo	-20.799305	-69.596314	Chile	Genetics	assess the genetic diversity and the degree of differentiation among groups of Prosopis	Thirteen populations were sampled from oases located on three hydrographic basins and genotyped.	Both natural and non-natural (humans) dispersal agents that may be moving Prosopisin the AtacamaDesert.					MF
Chile & Oasis	Bessega et al (2021)	Cecilia Bessega, Carolina Pometti, Reneé Fortunato, Francisca Greene, Calogero M. Santoro, Virginia McRostie	2021	Genetic studies of various Prosopis species (Leguminosae, Section Algarobia ) co-occurring in oases of the Atacama Desert (northern Chile)	Ecology and Evolution.	11		2375–2390	10.1002/ece3.7212	Quillagua Norte	-21.624143	-69.554670	Chile	Genetics	assess the genetic diversity and the degree of differentiation among groups of Prosopis	Thirteen populations were sampled from oases located on three hydrographic basins and genotyped.	Both natural and non-natural (humans) dispersal agents that may be moving Prosopisin the AtacamaDesert.					MF
Chile & Oasis	Bessega et al (2021)	Cecilia Bessega, Carolina Pometti, Reneé Fortunato, Francisca Greene, Calogero M. Santoro, Virginia McRostie	2021	Genetic studies of various Prosopis species (Leguminosae, Section Algarobia ) co-occurring in oases of the Atacama Desert (northern Chile)	Ecology and Evolution.	11		2375–2390	10.1002/ece3.7212	Quillagua	-21.654095	-69.538513	Chile	Genetics	assess the genetic diversity and the degree of differentiation among groups of Prosopis	Thirteen populations were sampled from oases located on three hydrographic basins and genotyped.	Both natural and non-natural (humans) dispersal agents that may be moving Prosopisin the AtacamaDesert.					MF
Chile & Oasis	Bessega et al (2021)	Cecilia Bessega, Carolina Pometti, Reneé Fortunato, Francisca Greene, Calogero M. Santoro, Virginia McRostie	2021	Genetic studies of various Prosopis species (Leguminosae, Section Algarobia ) co-occurring in oases of the Atacama Desert (northern Chile)	Ecology and Evolution.	11		2375–2390	10.1002/ece3.7212	Chiu-Chiu	-22.318571	-68.649949	Chile	Genetics	assess the genetic diversity and the degree of differentiation among groups of Prosopis	Thirteen populations were sampled from oases located on three hydrographic basins and genotyped.	Both natural and non-natural (humans) dispersal agents that may be moving Prosopisin the AtacamaDesert.					MF
Chile & Oasis	Bessega et al (2021)	Cecilia Bessega, Carolina Pometti, Reneé Fortunato, Francisca Greene, Calogero M. Santoro, Virginia McRostie	2021	Genetic studies of various Prosopis species (Leguminosae, Section Algarobia ) co-occurring in oases of the Atacama Desert (northern Chile)	Ecology and Evolution.	11		2375–2390	10.1002/ece3.7212	Toconao	-23.189407	-68.010058	Chile	Genetics	assess the genetic diversity and the degree of differentiation among groups of Prosopis	Thirteen populations were sampled from oases located on three hydrographic basins and genotyped.	Both natural and non-natural (humans) dispersal agents that may be moving Prosopisin the AtacamaDesert.					MF
Chile & Oasis	Bessega et al (2021)	Cecilia Bessega, Carolina Pometti, Reneé Fortunato, Francisca Greene, Calogero M. Santoro, Virginia McRostie	2021	Genetic studies of various Prosopis species (Leguminosae, Section Algarobia ) co-occurring in oases of the Atacama Desert (northern Chile)	Ecology and Evolution.	11		2375–2390	10.1002/ece3.7212	Camar	-23.406153	-67.961246	Chile	Genetics	assess the genetic diversity and the degree of differentiation among groups of Prosopis	Thirteen populations were sampled from oases located on three hydrographic basins and genotyped.	Both natural and non-natural (humans) dispersal agents that may be moving Prosopisin the AtacamaDesert.					MF
Chile & Oasis	Bessega et al (2021)	Cecilia Bessega, Carolina Pometti, Reneé Fortunato, Francisca Greene, Calogero M. Santoro, Virginia McRostie	2021	Genetic studies of various Prosopis species (Leguminosae, Section Algarobia ) co-occurring in oases of the Atacama Desert (northern Chile)	Ecology and Evolution.	11		2375–2390	10.1002/ece3.7212	Tilomonte	-23.793277	-68.108796	Chile	Genetics	assess the genetic diversity and the degree of differentiation among groups of Prosopis	Thirteen populations were sampled from oases located on three hydrographic basins and genotyped.	Both natural and non-natural (humans) dispersal agents that may be moving Prosopisin the AtacamaDesert.					MF
Chile & Oasis	Knudson et al (2009)	Kelly J. Knudson, Christina Torres-Rouff	2009	Investigating Cultural Heterogeneity in San Pedro de Atacama, Northern Chile, Through Biogeochemistry and Bioarchaeology	Am J Phys Anthropol	138		73–485	10.1002/ajpa.20965	San Pedro di Atacama (main village)	-22.916667	-68.200000	Chile	Sociology	Hypothesis that the Caspana population represents a migrant group	Analyses of strontium and oxygen iso-topes, cranial modification styles, and mortuary behavior	Rather a group of altiplano group of altiplano migrants, the Caspana existed in the region for quite a long time.					MF
Chile & Oasis	Lictevout et al (2020)	Elisabeth Lictevout, Carlos Abellanosa, Constanza Maass, Nicolás Pérez, Gonzalo Yáñez, Leonardi Véronique	2020	Exploration, mapping and characterization of filtration galleries of the Pica Oasis, northern Chile: A contribution to the knowledge of the Pica aquifer	Andean Geology	47	1	529-558	10.5027/andgeoV47n3-3272	Pica	-20.488541	-69.322310	Chile	Hydrogeology	To understand groundwater processes, preserve the water and geoheritage of one of the driest places on Earth and improve land-use planning	To explore the filtration galleries, locally called socavones, of the oasis of Pica	24 socavones were identified, mapped and their main physical features described, showing common traits with filtration galleries described worldwide. Most are abandoned today, owing to physical and socioeconomic changes.					MF
Chile & Oasis	Lictevout et al (2020)	Elisabeth Lictevout, Carlos Abellanosa, Constanza Maass, Nicolás Pérez, Gonzalo Yáñez, Leonardi Véronique	2020	Exploration, mapping and characterization of filtration galleries of the Pica Oasis, northern Chile: A contribution to the knowledge of the Pica aquifer	Andean Geology	47	1	529-558	10.5027/andgeoV47n3-3272	Matilla	-20.514917	-69.36257	Chile	Hydrogeology	To understand groundwater processes, preserve the water and geoheritage of one of the driest places on Earth and improve land-use planning	To explore the filtration galleries, locally called socavones, of the oasis of Pica	25 socavones were identified, mapped and their main physical features described, showing common traits with filtration galleries described worldwide. Most are abandoned today, owing to physical and socioeconomic changes.					MF
Chile & Oasis	Lobos et al (2016)	Gabriel Lobos, Nicolás Rebolledo, Andrs Rebolledo, Andrés Charrier & Osvaldo Rojas	2016	Natural history notes of Telmatobius dankoi (Anura, Telmatobiidae), a critically endangered species from northern Chile	Studies on Neotropical Fauna and Environment	51	2	152-157	10.1080/01650521.2016.1203519	Calama	-22.465907	-68.922282	Chile	Ecology	Telmatobius dankoi is a species described from only one locality in the Atacama Desert in	The study (distribution, habitat, density, diet) was performed in the Oasis de Calama	Telmatobius dankoiis thus one of the most threatened vertebrates of Chile.					MF
Chile & Oasis	Moat et al (2021)	Justin Moata, Alfonso Orellana-Garciab, Carolina Tovara, Monica Arakakíb, Ćesar Aranab, Asuncion Canób, Luis Faundezd, Martin Gardnere, Paulina Hechenleitnera, Josefina Heppf, Gwilym Lewisa, Jośe-Manuel Mamanig, María Miyasiroh, OliverQ. Whaley	2021	Seeing through the clouds - Mapping desert fog oasis ecosystems using 20 years of MODIS imagery over Peru and Chile	International Journal of Applied Earth Observations and Geoinformation	103		1-13	10.1016/j.jag.2021.102468	Península de Illescas	-5.956009	-81.046974	Peru	Remote sensing	The desert fog oasis ecosystem of Peru and Chile comprises numerous oases along 3000 km of the Pacific coastal belt, due to their marked seasonality and fog cover they are poorly mapped, which greatly compromises their conservation.	Using 20-years of MODIS data to reliably map the fog oases extent and seasonality. Examination of the main drivers of productivity using generalised linear models.	Over four times more fog oases than previously recorded were discovered and mapped. Fog oases are highly endemic, threatened, yet poorly collected and protected. Assessment of human pressures, conservation efforts, and summary of present plant diversity knowledge.			Coastal fog oases		MF
Chile & Oasis	Moat et al (2021)	Justin Moata, Alfonso Orellana-Garciab, Carolina Tovara, Monica Arakakíb, Ćesar Aranab, Asuncion Canób, Luis Faundezd, Martin Gardnere, Paulina Hechenleitnera, Josefina Heppf, Gwilym Lewisa, Jośe-Manuel Mamanig, María Miyasiroh, OliverQ. Whaley	2021	Seeing through the clouds - Mapping desert fog oasis ecosystems using 20 years of MODIS imagery over Peru and Chile	International Journal of Applied Earth Observations and Geoinformation	103		1-13	10.1016/j.jag.2021.102468	Cerro Reque	-6.8707	-79.7730	Peru	Remote sensing	The desert fog oasis ecosystem of Peru and Chile comprises numerous oases along 3000 km of the Pacific coastal belt, due to their marked seasonality and fog cover they are poorly mapped, which greatly compromises their conservation.	Using 20-years of MODIS data to reliably map the fog oases extent and seasonality. Examination of the main drivers of productivity using generalised linear models.	Over four times more fog oases than previously recorded were discovered and mapped. Fog oases are highly endemic, threatened, yet poorly collected and protected. Assessment of human pressures, conservation efforts, and summary of present plant diversity knowledge.			Coastal fog oases		MF
Chile & Oasis	Moat et al (2021)	Justin Moata, Alfonso Orellana-Garciab, Carolina Tovara, Monica Arakakíb, Ćesar Aranab, Asuncion Canób, Luis Faundezd, Martin Gardnere, Paulina Hechenleitnera, Josefina Heppf, Gwilym Lewisa, Jośe-Manuel Mamanig, María Miyasiroh, OliverQ. Whaley	2021	Seeing through the clouds - Mapping desert fog oasis ecosystems using 20 years of MODIS imagery over Peru and Chile	International Journal of Applied Earth Observations and Geoinformation	103		1-13	10.1016/j.jag.2021.102468	Cerro Faclo	-7.2633	-79.5407	Peru	Remote sensing	The desert fog oasis ecosystem of Peru and Chile comprises numerous oases along 3000 km of the Pacific coastal belt, due to their marked seasonality and fog cover they are poorly mapped, which greatly compromises their conservation.	Using 20-years of MODIS data to reliably map the fog oases extent and seasonality. Examination of the main drivers of productivity using generalised linear models.	Over four times more fog oases than previously recorded were discovered and mapped. Fog oases are highly endemic, threatened, yet poorly collected and protected. Assessment of human pressures, conservation efforts, and summary of present plant diversity knowledge.			Coastal fog oases		MF
Chile & Oasis	Moat et al (2021)	Justin Moata, Alfonso Orellana-Garciab, Carolina Tovara, Monica Arakakíb, Ćesar Aranab, Asuncion Canób, Luis Faundezd, Martin Gardnere, Paulina Hechenleitnera, Josefina Heppf, Gwilym Lewisa, Jośe-Manuel Mamanig, María Miyasiroh, OliverQ. Whaley	2021	Seeing through the clouds - Mapping desert fog oasis ecosystems using 20 years of MODIS imagery over Peru and Chile	International Journal of Applied Earth Observations and Geoinformation	103		1-13	10.1016/j.jag.2021.102468	Cerros Paiján	-7.692145	-79.253185	Peru	Remote sensing	The desert fog oasis ecosystem of Peru and Chile comprises numerous oases along 3000 km of the Pacific coastal belt, due to their marked seasonality and fog cover they are poorly mapped, which greatly compromises their conservation.	Using 20-years of MODIS data to reliably map the fog oases extent and seasonality. Examination of the main drivers of productivity using generalised linear models.	Over four times more fog oases than previously recorded were discovered and mapped. Fog oases are highly endemic, threatened, yet poorly collected and protected. Assessment of human pressures, conservation efforts, and summary of present plant diversity knowledge.			Coastal fog oases		MF
Chile & Oasis	Moat et al (2021)	Justin Moata, Alfonso Orellana-Garciab, Carolina Tovara, Monica Arakakíb, Ćesar Aranab, Asuncion Canób, Luis Faundezd, Martin Gardnere, Paulina Hechenleitnera, Josefina Heppf, Gwilym Lewisa, Jośe-Manuel Mamanig, María Miyasiroh, OliverQ. Whaley	2021	Seeing through the clouds - Mapping desert fog oasis ecosystems using 20 years of MODIS imagery over Peru and Chile	International Journal of Applied Earth Observations and Geoinformation	103		1-13	10.1016/j.jag.2021.102468	Cerro Campana	-7.9667	-79.1000	Peru	Remote sensing	The desert fog oasis ecosystem of Peru and Chile comprises numerous oases along 3000 km of the Pacific coastal belt, due to their marked seasonality and fog cover they are poorly mapped, which greatly compromises their conservation.	Using 20-years of MODIS data to reliably map the fog oases extent and seasonality. Examination of the main drivers of productivity using generalised linear models.	Over four times more fog oases than previously recorded were discovered and mapped. Fog oases are highly endemic, threatened, yet poorly collected and protected. Assessment of human pressures, conservation efforts, and summary of present plant diversity knowledge.			Coastal fog oases		MF
Chile & Oasis	Moat et al (2021)	Justin Moata, Alfonso Orellana-Garciab, Carolina Tovara, Monica Arakakíb, Ćesar Aranab, Asuncion Canób, Luis Faundezd, Martin Gardnere, Paulina Hechenleitnera, Josefina Heppf, Gwilym Lewisa, Jośe-Manuel Mamanig, María Miyasiroh, OliverQ. Whaley	2021	Seeing through the clouds - Mapping desert fog oasis ecosystems using 20 years of MODIS imagery over Peru and Chile	International Journal of Applied Earth Observations and Geoinformation	103		1-13	10.1016/j.jag.2021.102468	Cerro Cabras	-8.0500	-79.0333	Peru	Remote sensing	The desert fog oasis ecosystem of Peru and Chile comprises numerous oases along 3000 km of the Pacific coastal belt, due to their marked seasonality and fog cover they are poorly mapped, which greatly compromises their conservation.	Using 20-years of MODIS data to reliably map the fog oases extent and seasonality. Examination of the main drivers of productivity using generalised linear models.	Over four times more fog oases than previously recorded were discovered and mapped. Fog oases are highly endemic, threatened, yet poorly collected and protected. Assessment of human pressures, conservation efforts, and summary of present plant diversity knowledge.			Coastal fog oases		MF
Chile & Oasis	Moat et al (2021)	Justin Moata, Alfonso Orellana-Garciab, Carolina Tovara, Monica Arakakíb, Ćesar Aranab, Asuncion Canób, Luis Faundezd, Martin Gardnere, Paulina Hechenleitnera, Josefina Heppf, Gwilym Lewisa, Jośe-Manuel Mamanig, María Miyasiroh, OliverQ. Whaley	2021	Seeing through the clouds - Mapping desert fog oasis ecosystems using 20 years of MODIS imagery over Peru and Chile	International Journal of Applied Earth Observations and Geoinformation	103		1-13	10.1016/j.jag.2021.102468	Ochiputur	-8.164911	-78.936827	Peru	Remote sensing	The desert fog oasis ecosystem of Peru and Chile comprises numerous oases along 3000 km of the Pacific coastal belt, due to their marked seasonality and fog cover they are poorly mapped, which greatly compromises their conservation.	Using 20-years of MODIS data to reliably map the fog oases extent and seasonality. Examination of the main drivers of productivity using generalised linear models.	Over four times more fog oases than previously recorded were discovered and mapped. Fog oases are highly endemic, threatened, yet poorly collected and protected. Assessment of human pressures, conservation efforts, and summary of present plant diversity knowledge.			Coastal fog oases		MF
Chile & Oasis	Moat et al (2021)	Justin Moata, Alfonso Orellana-Garciab, Carolina Tovara, Monica Arakakíb, Ćesar Aranab, Asuncion Canób, Luis Faundezd, Martin Gardnere, Paulina Hechenleitnera, Josefina Heppf, Gwilym Lewisa, Jośe-Manuel Mamanig, María Miyasiroh, OliverQ. Whaley	2021	Seeing through the clouds - Mapping desert fog oasis ecosystems using 20 years of MODIS imagery over Peru and Chile	International Journal of Applied Earth Observations and Geoinformation	103		1-13	10.1016/j.jag.2021.102468	Virú	-8.315632	-78.800732	Peru	Remote sensing	The desert fog oasis ecosystem of Peru and Chile comprises numerous oases along 3000 km of the Pacific coastal belt, due to their marked seasonality and fog cover they are poorly mapped, which greatly compromises their conservation.	Using 20-years of MODIS data to reliably map the fog oases extent and seasonality. Examination of the main drivers of productivity using generalised linear models.	Over four times more fog oases than previously recorded were discovered and mapped. Fog oases are highly endemic, threatened, yet poorly collected and protected. Assessment of human pressures, conservation efforts, and summary of present plant diversity knowledge.			Coastal fog oases		MF
Chile & Oasis	Moat et al (2021)	Justin Moata, Alfonso Orellana-Garciab, Carolina Tovara, Monica Arakakíb, Ćesar Aranab, Asuncion Canób, Luis Faundezd, Martin Gardnere, Paulina Hechenleitnera, Josefina Heppf, Gwilym Lewisa, Jośe-Manuel Mamanig, María Miyasiroh, OliverQ. Whaley	2021	Seeing through the clouds - Mapping desert fog oasis ecosystems using 20 years of MODIS imagery over Peru and Chile	International Journal of Applied Earth Observations and Geoinformation	103		1-13	10.1016/j.jag.2021.102468	Morro Guañape	-8.431732	-78.923557	Peru	Remote sensing	The desert fog oasis ecosystem of Peru and Chile comprises numerous oases along 3000 km of the Pacific coastal belt, due to their marked seasonality and fog cover they are poorly mapped, which greatly compromises their conservation.	Using 20-years of MODIS data to reliably map the fog oases extent and seasonality. Examination of the main drivers of productivity using generalised linear models.	Over four times more fog oases than previously recorded were discovered and mapped. Fog oases are highly endemic, threatened, yet poorly collected and protected. Assessment of human pressures, conservation efforts, and summary of present plant diversity knowledge.			Coastal fog oases		MF
Chile & Oasis	Moat et al (2021)	Justin Moata, Alfonso Orellana-Garciab, Carolina Tovara, Monica Arakakíb, Ćesar Aranab, Asuncion Canób, Luis Faundezd, Martin Gardnere, Paulina Hechenleitnera, Josefina Heppf, Gwilym Lewisa, Jośe-Manuel Mamanig, María Miyasiroh, OliverQ. Whaley	2021	Seeing through the clouds - Mapping desert fog oasis ecosystems using 20 years of MODIS imagery over Peru and Chile	International Journal of Applied Earth Observations and Geoinformation	103		1-13	10.1016/j.jag.2021.102468	Cerro Huacos	-8.8002	-78.4434	Peru	Remote sensing	The desert fog oasis ecosystem of Peru and Chile comprises numerous oases along 3000 km of the Pacific coastal belt, due to their marked seasonality and fog cover they are poorly mapped, which greatly compromises their conservation.	Using 20-years of MODIS data to reliably map the fog oases extent and seasonality. Examination of the main drivers of productivity using generalised linear models.	Over four times more fog oases than previously recorded were discovered and mapped. Fog oases are highly endemic, threatened, yet poorly collected and protected. Assessment of human pressures, conservation efforts, and summary of present plant diversity knowledge.			Coastal fog oases		MF
Chile & Oasis	Moat et al (2021)	Justin Moata, Alfonso Orellana-Garciab, Carolina Tovara, Monica Arakakíb, Ćesar Aranab, Asuncion Canób, Luis Faundezd, Martin Gardnere, Paulina Hechenleitnera, Josefina Heppf, Gwilym Lewisa, Jośe-Manuel Mamanig, María Miyasiroh, OliverQ. Whaley	2021	Seeing through the clouds - Mapping desert fog oasis ecosystems using 20 years of MODIS imagery over Peru and Chile	International Journal of Applied Earth Observations and Geoinformation	103		1-13	10.1016/j.jag.2021.102468	Cerros San Cristobal	-9.071204	-78.311577	Peru	Remote sensing	The desert fog oasis ecosystem of Peru and Chile comprises numerous oases along 3000 km of the Pacific coastal belt, due to their marked seasonality and fog cover they are poorly mapped, which greatly compromises their conservation.	Using 20-years of MODIS data to reliably map the fog oases extent and seasonality. Examination of the main drivers of productivity using generalised linear models.	Over four times more fog oases than previously recorded were discovered and mapped. Fog oases are highly endemic, threatened, yet poorly collected and protected. Assessment of human pressures, conservation efforts, and summary of present plant diversity knowledge.			Coastal fog oases		MF
Chile & Oasis	Moat et al (2021)	Justin Moata, Alfonso Orellana-Garciab, Carolina Tovara, Monica Arakakíb, Ćesar Aranab, Asuncion Canób, Luis Faundezd, Martin Gardnere, Paulina Hechenleitnera, Josefina Heppf, Gwilym Lewisa, Jośe-Manuel Mamanig, María Miyasiroh, OliverQ. Whaley	2021	Seeing through the clouds - Mapping desert fog oasis ecosystems using 20 years of MODIS imagery over Peru and Chile	International Journal of Applied Earth Observations and Geoinformation	103		1-13	10.1016/j.jag.2021.102468	Mongón	-9.625151	-78.323638	Peru	Remote sensing	The desert fog oasis ecosystem of Peru and Chile comprises numerous oases along 3000 km of the Pacific coastal belt, due to their marked seasonality and fog cover they are poorly mapped, which greatly compromises their conservation.	Using 20-years of MODIS data to reliably map the fog oases extent and seasonality. Examination of the main drivers of productivity using generalised linear models.	Over four times more fog oases than previously recorded were discovered and mapped. Fog oases are highly endemic, threatened, yet poorly collected and protected. Assessment of human pressures, conservation efforts, and summary of present plant diversity knowledge.			Coastal fog oases		MF
Chile & Oasis	Moat et al (2021)	Justin Moata, Alfonso Orellana-Garciab, Carolina Tovara, Monica Arakakíb, Ćesar Aranab, Asuncion Canób, Luis Faundezd, Martin Gardnere, Paulina Hechenleitnera, Josefina Heppf, Gwilym Lewisa, Jośe-Manuel Mamanig, María Miyasiroh, OliverQ. Whaley	2021	Seeing through the clouds - Mapping desert fog oasis ecosystems using 20 years of MODIS imagery over Peru and Chile	International Journal of Applied Earth Observations and Geoinformation	103		1-13	10.1016/j.jag.2021.102468	Lupín	-10.397275	-77.946478	Peru	Remote sensing	The desert fog oasis ecosystem of Peru and Chile comprises numerous oases along 3000 km of the Pacific coastal belt, due to their marked seasonality and fog cover they are poorly mapped, which greatly compromises their conservation.	Using 20-years of MODIS data to reliably map the fog oases extent and seasonality. Examination of the main drivers of productivity using generalised linear models.	Over four times more fog oases than previously recorded were discovered and mapped. Fog oases are highly endemic, threatened, yet poorly collected and protected. Assessment of human pressures, conservation efforts, and summary of present plant diversity knowledge.			Coastal fog oases		MF
Chile & Oasis	Moat et al (2021)	Justin Moata, Alfonso Orellana-Garciab, Carolina Tovara, Monica Arakakíb, Ćesar Aranab, Asuncion Canób, Luis Faundezd, Martin Gardnere, Paulina Hechenleitnera, Josefina Heppf, Gwilym Lewisa, Jośe-Manuel Mamanig, María Miyasiroh, OliverQ. Whaley	2021	Seeing through the clouds - Mapping desert fog oasis ecosystems using 20 years of MODIS imagery over Peru and Chile	International Journal of Applied Earth Observations and Geoinformation	103		1-13	10.1016/j.jag.2021.102468	Pativilca	-10.675502	-77.765880	Peru	Remote sensing	The desert fog oasis ecosystem of Peru and Chile comprises numerous oases along 3000 km of the Pacific coastal belt, due to their marked seasonality and fog cover they are poorly mapped, which greatly compromises their conservation.	Using 20-years of MODIS data to reliably map the fog oases extent and seasonality. Examination of the main drivers of productivity using generalised linear models.	Over four times more fog oases than previously recorded were discovered and mapped. Fog oases are highly endemic, threatened, yet poorly collected and protected. Assessment of human pressures, conservation efforts, and summary of present plant diversity knowledge.			Coastal fog oases		MF
Chile & Oasis	Moat et al (2021)	Justin Moata, Alfonso Orellana-Garciab, Carolina Tovara, Monica Arakakíb, Ćesar Aranab, Asuncion Canób, Luis Faundezd, Martin Gardnere, Paulina Hechenleitnera, Josefina Heppf, Gwilym Lewisa, Jośe-Manuel Mamanig, María Miyasiroh, OliverQ. Whaley	2021	Seeing through the clouds - Mapping desert fog oasis ecosystems using 20 years of MODIS imagery over Peru and Chile	International Journal of Applied Earth Observations and Geoinformation	103		1-13	10.1016/j.jag.2021.102468	Supe	-10.760583	-77.677570	Peru	Remote sensing	The desert fog oasis ecosystem of Peru and Chile comprises numerous oases along 3000 km of the Pacific coastal belt, due to their marked seasonality and fog cover they are poorly mapped, which greatly compromises their conservation.	Using 20-years of MODIS data to reliably map the fog oases extent and seasonality. Examination of the main drivers of productivity using generalised linear models.	Over four times more fog oases than previously recorded were discovered and mapped. Fog oases are highly endemic, threatened, yet poorly collected and protected. Assessment of human pressures, conservation efforts, and summary of present plant diversity knowledge.			Coastal fog oases		MF
Chile & Oasis	Moat et al (2021)	Justin Moata, Alfonso Orellana-Garciab, Carolina Tovara, Monica Arakakíb, Ćesar Aranab, Asuncion Canób, Luis Faundezd, Martin Gardnere, Paulina Hechenleitnera, Josefina Heppf, Gwilym Lewisa, Jośe-Manuel Mamanig, María Miyasiroh, OliverQ. Whaley	2021	Seeing through the clouds - Mapping desert fog oasis ecosystems using 20 years of MODIS imagery over Peru and Chile	International Journal of Applied Earth Observations and Geoinformation	103		1-13	10.1016/j.jag.2021.102468	Limán	-10.822630	-77.617785	Peru	Remote sensing	The desert fog oasis ecosystem of Peru and Chile comprises numerous oases along 3000 km of the Pacific coastal belt, due to their marked seasonality and fog cover they are poorly mapped, which greatly compromises their conservation.	Using 20-years of MODIS data to reliably map the fog oases extent and seasonality. Examination of the main drivers of productivity using generalised linear models.	Over four times more fog oases than previously recorded were discovered and mapped. Fog oases are highly endemic, threatened, yet poorly collected and protected. Assessment of human pressures, conservation efforts, and summary of present plant diversity knowledge.			Coastal fog oases		MF
Chile & Oasis	Moat et al (2021)	Justin Moata, Alfonso Orellana-Garciab, Carolina Tovara, Monica Arakakíb, Ćesar Aranab, Asuncion Canób, Luis Faundezd, Martin Gardnere, Paulina Hechenleitnera, Josefina Heppf, Gwilym Lewisa, Jośe-Manuel Mamanig, María Miyasiroh, OliverQ. Whaley	2021	Seeing through the clouds - Mapping desert fog oasis ecosystems using 20 years of MODIS imagery over Peru and Chile	International Journal of Applied Earth Observations and Geoinformation	103		1-13	10.1016/j.jag.2021.102468	Alpacoto	-10.862344	-77.503397	Peru	Remote sensing	The desert fog oasis ecosystem of Peru and Chile comprises numerous oases along 3000 km of the Pacific coastal belt, due to their marked seasonality and fog cover they are poorly mapped, which greatly compromises their conservation.	Using 20-years of MODIS data to reliably map the fog oases extent and seasonality. Examination of the main drivers of productivity using generalised linear models.	Over four times more fog oases than previously recorded were discovered and mapped. Fog oases are highly endemic, threatened, yet poorly collected and protected. Assessment of human pressures, conservation efforts, and summary of present plant diversity knowledge.			Coastal fog oases		MF
Chile & Oasis	Moat et al (2021)	Justin Moata, Alfonso Orellana-Garciab, Carolina Tovara, Monica Arakakíb, Ćesar Aranab, Asuncion Canób, Luis Faundezd, Martin Gardnere, Paulina Hechenleitnera, Josefina Heppf, Gwilym Lewisa, Jośe-Manuel Mamanig, María Miyasiroh, OliverQ. Whaley	2021	Seeing through the clouds - Mapping desert fog oasis ecosystems using 20 years of MODIS imagery over Peru and Chile	International Journal of Applied Earth Observations and Geoinformation	103		1-13	10.1016/j.jag.2021.102468	Lurihuasi	-10.884000	-77.555000	Peru	Remote sensing	The desert fog oasis ecosystem of Peru and Chile comprises numerous oases along 3000 km of the Pacific coastal belt, due to their marked seasonality and fog cover they are poorly mapped, which greatly compromises their conservation.	Using 20-years of MODIS data to reliably map the fog oases extent and seasonality. Examination of the main drivers of productivity using generalised linear models.	Over four times more fog oases than previously recorded were discovered and mapped. Fog oases are highly endemic, threatened, yet poorly collected and protected. Assessment of human pressures, conservation efforts, and summary of present plant diversity knowledge.			Coastal fog oases		MF
Chile & Oasis	Moat et al (2021)	Justin Moata, Alfonso Orellana-Garciab, Carolina Tovara, Monica Arakakíb, Ćesar Aranab, Asuncion Canób, Luis Faundezd, Martin Gardnere, Paulina Hechenleitnera, Josefina Heppf, Gwilym Lewisa, Jośe-Manuel Mamanig, María Miyasiroh, OliverQ. Whaley	2021	Seeing through the clouds - Mapping desert fog oasis ecosystems using 20 years of MODIS imagery over Peru and Chile	International Journal of Applied Earth Observations and Geoinformation	103		1-13	10.1016/j.jag.2021.102468	Caral	-10.9340	-77.5260	Peru	Remote sensing	The desert fog oasis ecosystem of Peru and Chile comprises numerous oases along 3000 km of the Pacific coastal belt, due to their marked seasonality and fog cover they are poorly mapped, which greatly compromises their conservation.	Using 20-years of MODIS data to reliably map the fog oases extent and seasonality. Examination of the main drivers of productivity using generalised linear models.	Over four times more fog oases than previously recorded were discovered and mapped. Fog oases are highly endemic, threatened, yet poorly collected and protected. Assessment of human pressures, conservation efforts, and summary of present plant diversity knowledge.			Coastal fog oases		MF
Chile & Oasis	Moat et al (2021)	Justin Moata, Alfonso Orellana-Garciab, Carolina Tovara, Monica Arakakíb, Ćesar Aranab, Asuncion Canób, Luis Faundezd, Martin Gardnere, Paulina Hechenleitnera, Josefina Heppf, Gwilym Lewisa, Jośe-Manuel Mamanig, María Miyasiroh, OliverQ. Whaley	2021	Seeing through the clouds - Mapping desert fog oasis ecosystems using 20 years of MODIS imagery over Peru and Chile	International Journal of Applied Earth Observations and Geoinformation	103		1-13	10.1016/j.jag.2021.102468	Lachay	-11.370106	-77.356245	Peru	Remote sensing	The desert fog oasis ecosystem of Peru and Chile comprises numerous oases along 3000 km of the Pacific coastal belt, due to their marked seasonality and fog cover they are poorly mapped, which greatly compromises their conservation.	Using 20-years of MODIS data to reliably map the fog oases extent and seasonality. Examination of the main drivers of productivity using generalised linear models.	Over four times more fog oases than previously recorded were discovered and mapped. Fog oases are highly endemic, threatened, yet poorly collected and protected. Assessment of human pressures, conservation efforts, and summary of present plant diversity knowledge.			Coastal fog oases		MF
Chile & Oasis	Moat et al (2021)	Justin Moata, Alfonso Orellana-Garciab, Carolina Tovara, Monica Arakakíb, Ćesar Aranab, Asuncion Canób, Luis Faundezd, Martin Gardnere, Paulina Hechenleitnera, Josefina Heppf, Gwilym Lewisa, Jośe-Manuel Mamanig, María Miyasiroh, OliverQ. Whaley	2021	Seeing through the clouds - Mapping desert fog oasis ecosystems using 20 years of MODIS imagery over Peru and Chile	International Journal of Applied Earth Observations and Geoinformation	103		1-13	10.1016/j.jag.2021.102468	Iguanil	-11.4010	-77.1750	Peru	Remote sensing	The desert fog oasis ecosystem of Peru and Chile comprises numerous oases along 3000 km of the Pacific coastal belt, due to their marked seasonality and fog cover they are poorly mapped, which greatly compromises their conservation.	Using 20-years of MODIS data to reliably map the fog oases extent and seasonality. Examination of the main drivers of productivity using generalised linear models.	Over four times more fog oases than previously recorded were discovered and mapped. Fog oases are highly endemic, threatened, yet poorly collected and protected. Assessment of human pressures, conservation efforts, and summary of present plant diversity knowledge.			Coastal fog oases		MF
Chile & Oasis	Moat et al (2021)	Justin Moata, Alfonso Orellana-Garciab, Carolina Tovara, Monica Arakakíb, Ćesar Aranab, Asuncion Canób, Luis Faundezd, Martin Gardnere, Paulina Hechenleitnera, Josefina Heppf, Gwilym Lewisa, Jośe-Manuel Mamanig, María Miyasiroh, OliverQ. Whaley	2021	Seeing through the clouds - Mapping desert fog oasis ecosystems using 20 years of MODIS imagery over Peru and Chile	International Journal of Applied Earth Observations and Geoinformation	103		1-13	10.1016/j.jag.2021.102468	Granados	-11.397684	-77.231780	Peru	Remote sensing	The desert fog oasis ecosystem of Peru and Chile comprises numerous oases along 3000 km of the Pacific coastal belt, due to their marked seasonality and fog cover they are poorly mapped, which greatly compromises their conservation.	Using 20-years of MODIS data to reliably map the fog oases extent and seasonality. Examination of the main drivers of productivity using generalised linear models.	Over four times more fog oases than previously recorded were discovered and mapped. Fog oases are highly endemic, threatened, yet poorly collected and protected. Assessment of human pressures, conservation efforts, and summary of present plant diversity knowledge.			Coastal fog oases		MF
Chile & Oasis	Moat et al (2021)	Justin Moata, Alfonso Orellana-Garciab, Carolina Tovara, Monica Arakakíb, Ćesar Aranab, Asuncion Canób, Luis Faundezd, Martin Gardnere, Paulina Hechenleitnera, Josefina Heppf, Gwilym Lewisa, Jośe-Manuel Mamanig, María Miyasiroh, OliverQ. Whaley	2021	Seeing through the clouds - Mapping desert fog oasis ecosystems using 20 years of MODIS imagery over Peru and Chile	International Journal of Applied Earth Observations and Geoinformation	103		1-13	10.1016/j.jag.2021.102468	Chancayllo	-11.4535	-77.2976	Peru	Remote sensing	The desert fog oasis ecosystem of Peru and Chile comprises numerous oases along 3000 km of the Pacific coastal belt, due to their marked seasonality and fog cover they are poorly mapped, which greatly compromises their conservation.	Using 20-years of MODIS data to reliably map the fog oases extent and seasonality. Examination of the main drivers of productivity using generalised linear models.	Over four times more fog oases than previously recorded were discovered and mapped. Fog oases are highly endemic, threatened, yet poorly collected and protected. Assessment of human pressures, conservation efforts, and summary of present plant diversity knowledge.			Coastal fog oases		MF
Chile & Oasis	Moat et al (2021)	Justin Moata, Alfonso Orellana-Garciab, Carolina Tovara, Monica Arakakíb, Ćesar Aranab, Asuncion Canób, Luis Faundezd, Martin Gardnere, Paulina Hechenleitnera, Josefina Heppf, Gwilym Lewisa, Jośe-Manuel Mamanig, María Miyasiroh, OliverQ. Whaley	2021	Seeing through the clouds - Mapping desert fog oasis ecosystems using 20 years of MODIS imagery over Peru and Chile	International Journal of Applied Earth Observations and Geoinformation	103		1-13	10.1016/j.jag.2021.102468	Aucallama	-11.585845	-77.105589	Peru	Remote sensing	The desert fog oasis ecosystem of Peru and Chile comprises numerous oases along 3000 km of the Pacific coastal belt, due to their marked seasonality and fog cover they are poorly mapped, which greatly compromises their conservation.	Using 20-years of MODIS data to reliably map the fog oases extent and seasonality. Examination of the main drivers of productivity using generalised linear models.	Over four times more fog oases than previously recorded were discovered and mapped. Fog oases are highly endemic, threatened, yet poorly collected and protected. Assessment of human pressures, conservation efforts, and summary of present plant diversity knowledge.			Coastal fog oases		MF
Chile & Oasis	Moat et al (2021)	Justin Moata, Alfonso Orellana-Garciab, Carolina Tovara, Monica Arakakíb, Ćesar Aranab, Asuncion Canób, Luis Faundezd, Martin Gardnere, Paulina Hechenleitnera, Josefina Heppf, Gwilym Lewisa, Jośe-Manuel Mamanig, María Miyasiroh, OliverQ. Whaley	2021	Seeing through the clouds - Mapping desert fog oasis ecosystems using 20 years of MODIS imagery over Peru and Chile	International Journal of Applied Earth Observations and Geoinformation	103		1-13	10.1016/j.jag.2021.102468	Ancón	-11.7170	-77.1650	Peru	Remote sensing	The desert fog oasis ecosystem of Peru and Chile comprises numerous oases along 3000 km of the Pacific coastal belt, due to their marked seasonality and fog cover they are poorly mapped, which greatly compromises their conservation.	Using 20-years of MODIS data to reliably map the fog oases extent and seasonality. Examination of the main drivers of productivity using generalised linear models.	Over four times more fog oases than previously recorded were discovered and mapped. Fog oases are highly endemic, threatened, yet poorly collected and protected. Assessment of human pressures, conservation efforts, and summary of present plant diversity knowledge.			Coastal fog oases		MF
Chile & Oasis	Moat et al (2021)	Justin Moata, Alfonso Orellana-Garciab, Carolina Tovara, Monica Arakakíb, Ćesar Aranab, Asuncion Canób, Luis Faundezd, Martin Gardnere, Paulina Hechenleitnera, Josefina Heppf, Gwilym Lewisa, Jośe-Manuel Mamanig, María Miyasiroh, OliverQ. Whaley	2021	Seeing through the clouds - Mapping desert fog oasis ecosystems using 20 years of MODIS imagery over Peru and Chile	International Journal of Applied Earth Observations and Geoinformation	103		1-13	10.1016/j.jag.2021.102468	Carabayllo	-11.8050	-77.0680	Peru	Remote sensing	The desert fog oasis ecosystem of Peru and Chile comprises numerous oases along 3000 km of the Pacific coastal belt, due to their marked seasonality and fog cover they are poorly mapped, which greatly compromises their conservation.	Using 20-years of MODIS data to reliably map the fog oases extent and seasonality. Examination of the main drivers of productivity using generalised linear models.	Over four times more fog oases than previously recorded were discovered and mapped. Fog oases are highly endemic, threatened, yet poorly collected and protected. Assessment of human pressures, conservation efforts, and summary of present plant diversity knowledge.			Coastal fog oases		MF
Chile & Oasis	Moat et al (2021)	Justin Moata, Alfonso Orellana-Garciab, Carolina Tovara, Monica Arakakíb, Ćesar Aranab, Asuncion Canób, Luis Faundezd, Martin Gardnere, Paulina Hechenleitnera, Josefina Heppf, Gwilym Lewisa, Jośe-Manuel Mamanig, María Miyasiroh, OliverQ. Whaley	2021	Seeing through the clouds - Mapping desert fog oasis ecosystems using 20 years of MODIS imagery over Peru and Chile	International Journal of Applied Earth Observations and Geoinformation	103		1-13	10.1016/j.jag.2021.102468	Puquio	-11.8230	-76.9750	Peru	Remote sensing	The desert fog oasis ecosystem of Peru and Chile comprises numerous oases along 3000 km of the Pacific coastal belt, due to their marked seasonality and fog cover they are poorly mapped, which greatly compromises their conservation.	Using 20-years of MODIS data to reliably map the fog oases extent and seasonality. Examination of the main drivers of productivity using generalised linear models.	Over four times more fog oases than previously recorded were discovered and mapped. Fog oases are highly endemic, threatened, yet poorly collected and protected. Assessment of human pressures, conservation efforts, and summary of present plant diversity knowledge.			Coastal fog oases		MF
Chile & Oasis	Moat et al (2021)	Justin Moata, Alfonso Orellana-Garciab, Carolina Tovara, Monica Arakakíb, Ćesar Aranab, Asuncion Canób, Luis Faundezd, Martin Gardnere, Paulina Hechenleitnera, Josefina Heppf, Gwilym Lewisa, Jośe-Manuel Mamanig, María Miyasiroh, OliverQ. Whaley	2021	Seeing through the clouds - Mapping desert fog oasis ecosystems using 20 years of MODIS imagery over Peru and Chile	International Journal of Applied Earth Observations and Geoinformation	103		1-13	10.1016/j.jag.2021.102468	Km22	-11.8710	-76.9960	Peru	Remote sensing	The desert fog oasis ecosystem of Peru and Chile comprises numerous oases along 3000 km of the Pacific coastal belt, due to their marked seasonality and fog cover they are poorly mapped, which greatly compromises their conservation.	Using 20-years of MODIS data to reliably map the fog oases extent and seasonality. Examination of the main drivers of productivity using generalised linear models.	Over four times more fog oases than previously recorded were discovered and mapped. Fog oases are highly endemic, threatened, yet poorly collected and protected. Assessment of human pressures, conservation efforts, and summary of present plant diversity knowledge.			Coastal fog oases		MF
Chile & Oasis	Moat et al (2021)	Justin Moata, Alfonso Orellana-Garciab, Carolina Tovara, Monica Arakakíb, Ćesar Aranab, Asuncion Canób, Luis Faundezd, Martin Gardnere, Paulina Hechenleitnera, Josefina Heppf, Gwilym Lewisa, Jośe-Manuel Mamanig, María Miyasiroh, OliverQ. Whaley	2021	Seeing through the clouds - Mapping desert fog oasis ecosystems using 20 years of MODIS imagery over Peru and Chile	International Journal of Applied Earth Observations and Geoinformation	103		1-13	10.1016/j.jag.2021.102468	Chillón	-11.901725	-77.092853	Peru	Remote sensing	The desert fog oasis ecosystem of Peru and Chile comprises numerous oases along 3000 km of the Pacific coastal belt, due to their marked seasonality and fog cover they are poorly mapped, which greatly compromises their conservation.	Using 20-years of MODIS data to reliably map the fog oases extent and seasonality. Examination of the main drivers of productivity using generalised linear models.	Over four times more fog oases than previously recorded were discovered and mapped. Fog oases are highly endemic, threatened, yet poorly collected and protected. Assessment of human pressures, conservation efforts, and summary of present plant diversity knowledge.			Coastal fog oases		MF
Chile & Oasis	Moat et al (2021)	Justin Moata, Alfonso Orellana-Garciab, Carolina Tovara, Monica Arakakíb, Ćesar Aranab, Asuncion Canób, Luis Faundezd, Martin Gardnere, Paulina Hechenleitnera, Josefina Heppf, Gwilym Lewisa, Jośe-Manuel Mamanig, María Miyasiroh, OliverQ. Whaley	2021	Seeing through the clouds - Mapping desert fog oasis ecosystems using 20 years of MODIS imagery over Peru and Chile	International Journal of Applied Earth Observations and Geoinformation	103		1-13	10.1016/j.jag.2021.102468	Collique	-11.9000	-77.0020	Peru	Remote sensing	The desert fog oasis ecosystem of Peru and Chile comprises numerous oases along 3000 km of the Pacific coastal belt, due to their marked seasonality and fog cover they are poorly mapped, which greatly compromises their conservation.	Using 20-years of MODIS data to reliably map the fog oases extent and seasonality. Examination of the main drivers of productivity using generalised linear models.	Over four times more fog oases than previously recorded were discovered and mapped. Fog oases are highly endemic, threatened, yet poorly collected and protected. Assessment of human pressures, conservation efforts, and summary of present plant diversity knowledge.			Coastal fog oases		MF
Chile & Oasis	Moat et al (2021)	Justin Moata, Alfonso Orellana-Garciab, Carolina Tovara, Monica Arakakíb, Ćesar Aranab, Asuncion Canób, Luis Faundezd, Martin Gardnere, Paulina Hechenleitnera, Josefina Heppf, Gwilym Lewisa, Jośe-Manuel Mamanig, María Miyasiroh, OliverQ. Whaley	2021	Seeing through the clouds - Mapping desert fog oasis ecosystems using 20 years of MODIS imagery over Peru and Chile	International Journal of Applied Earth Observations and Geoinformation	103		1-13	10.1016/j.jag.2021.102468	Payet	-11.9460	-77.0180	Peru	Remote sensing	The desert fog oasis ecosystem of Peru and Chile comprises numerous oases along 3000 km of the Pacific coastal belt, due to their marked seasonality and fog cover they are poorly mapped, which greatly compromises their conservation.	Using 20-years of MODIS data to reliably map the fog oases extent and seasonality. Examination of the main drivers of productivity using generalised linear models.	Over four times more fog oases than previously recorded were discovered and mapped. Fog oases are highly endemic, threatened, yet poorly collected and protected. Assessment of human pressures, conservation efforts, and summary of present plant diversity knowledge.			Coastal fog oases		MF
Chile & Oasis	Moat et al (2021)	Justin Moata, Alfonso Orellana-Garciab, Carolina Tovara, Monica Arakakíb, Ćesar Aranab, Asuncion Canób, Luis Faundezd, Martin Gardnere, Paulina Hechenleitnera, Josefina Heppf, Gwilym Lewisa, Jośe-Manuel Mamanig, María Miyasiroh, OliverQ. Whaley	2021	Seeing through the clouds - Mapping desert fog oasis ecosystems using 20 years of MODIS imagery over Peru and Chile	International Journal of Applied Earth Observations and Geoinformation	103		1-13	10.1016/j.jag.2021.102468	Amancaes	-11.9950	-77.0280	Peru	Remote sensing	The desert fog oasis ecosystem of Peru and Chile comprises numerous oases along 3000 km of the Pacific coastal belt, due to their marked seasonality and fog cover they are poorly mapped, which greatly compromises their conservation.	Using 20-years of MODIS data to reliably map the fog oases extent and seasonality. Examination of the main drivers of productivity using generalised linear models.	Over four times more fog oases than previously recorded were discovered and mapped. Fog oases are highly endemic, threatened, yet poorly collected and protected. Assessment of human pressures, conservation efforts, and summary of present plant diversity knowledge.			Coastal fog oases		MF
Chile & Oasis	Moat et al (2021)	Justin Moata, Alfonso Orellana-Garciab, Carolina Tovara, Monica Arakakíb, Ćesar Aranab, Asuncion Canób, Luis Faundezd, Martin Gardnere, Paulina Hechenleitnera, Josefina Heppf, Gwilym Lewisa, Jośe-Manuel Mamanig, María Miyasiroh, OliverQ. Whaley	2021	Seeing through the clouds - Mapping desert fog oasis ecosystems using 20 years of MODIS imagery over Peru and Chile	International Journal of Applied Earth Observations and Geoinformation	103		1-13	10.1016/j.jag.2021.102468	Mangomarca	-11.9990	-76.9710	Peru	Remote sensing	The desert fog oasis ecosystem of Peru and Chile comprises numerous oases along 3000 km of the Pacific coastal belt, due to their marked seasonality and fog cover they are poorly mapped, which greatly compromises their conservation.	Using 20-years of MODIS data to reliably map the fog oases extent and seasonality. Examination of the main drivers of productivity using generalised linear models.	Over four times more fog oases than previously recorded were discovered and mapped. Fog oases are highly endemic, threatened, yet poorly collected and protected. Assessment of human pressures, conservation efforts, and summary of present plant diversity knowledge.			Coastal fog oases		MF
Chile & Oasis	Moat et al (2021)	Justin Moata, Alfonso Orellana-Garciab, Carolina Tovara, Monica Arakakíb, Ćesar Aranab, Asuncion Canób, Luis Faundezd, Martin Gardnere, Paulina Hechenleitnera, Josefina Heppf, Gwilym Lewisa, Jośe-Manuel Mamanig, María Miyasiroh, OliverQ. Whaley	2021	Seeing through the clouds - Mapping desert fog oasis ecosystems using 20 years of MODIS imagery over Peru and Chile	International Journal of Applied Earth Observations and Geoinformation	103		1-13	10.1016/j.jag.2021.102468	San Lorenzo	-12.076466	-77.228570	Peru	Remote sensing	The desert fog oasis ecosystem of Peru and Chile comprises numerous oases along 3000 km of the Pacific coastal belt, due to their marked seasonality and fog cover they are poorly mapped, which greatly compromises their conservation.	Using 20-years of MODIS data to reliably map the fog oases extent and seasonality. Examination of the main drivers of productivity using generalised linear models.	Over four times more fog oases than previously recorded were discovered and mapped. Fog oases are highly endemic, threatened, yet poorly collected and protected. Assessment of human pressures, conservation efforts, and summary of present plant diversity knowledge.			Coastal fog oases		MF
Chile & Oasis	Moat et al (2021)	Justin Moata, Alfonso Orellana-Garciab, Carolina Tovara, Monica Arakakíb, Ćesar Aranab, Asuncion Canób, Luis Faundezd, Martin Gardnere, Paulina Hechenleitnera, Josefina Heppf, Gwilym Lewisa, Jośe-Manuel Mamanig, María Miyasiroh, OliverQ. Whaley	2021	Seeing through the clouds - Mapping desert fog oasis ecosystems using 20 years of MODIS imagery over Peru and Chile	International Journal of Applied Earth Observations and Geoinformation	103		1-13	10.1016/j.jag.2021.102468	Manchay	-12.1250	-76.8470	Peru	Remote sensing	The desert fog oasis ecosystem of Peru and Chile comprises numerous oases along 3000 km of the Pacific coastal belt, due to their marked seasonality and fog cover they are poorly mapped, which greatly compromises their conservation.	Using 20-years of MODIS data to reliably map the fog oases extent and seasonality. Examination of the main drivers of productivity using generalised linear models.	Over four times more fog oases than previously recorded were discovered and mapped. Fog oases are highly endemic, threatened, yet poorly collected and protected. Assessment of human pressures, conservation efforts, and summary of present plant diversity knowledge.			Coastal fog oases		MF
Chile & Oasis	Moat et al (2021)	Justin Moata, Alfonso Orellana-Garciab, Carolina Tovara, Monica Arakakíb, Ćesar Aranab, Asuncion Canób, Luis Faundezd, Martin Gardnere, Paulina Hechenleitnera, Josefina Heppf, Gwilym Lewisa, Jośe-Manuel Mamanig, María Miyasiroh, OliverQ. Whaley	2021	Seeing through the clouds - Mapping desert fog oasis ecosystems using 20 years of MODIS imagery over Peru and Chile	International Journal of Applied Earth Observations and Geoinformation	103		1-13	10.1016/j.jag.2021.102468	Retamal	-12.1324	-76.8918	Peru	Remote sensing	The desert fog oasis ecosystem of Peru and Chile comprises numerous oases along 3000 km of the Pacific coastal belt, due to their marked seasonality and fog cover they are poorly mapped, which greatly compromises their conservation.	Using 20-years of MODIS data to reliably map the fog oases extent and seasonality. Examination of the main drivers of productivity using generalised linear models.	Over four times more fog oases than previously recorded were discovered and mapped. Fog oases are highly endemic, threatened, yet poorly collected and protected. Assessment of human pressures, conservation efforts, and summary of present plant diversity knowledge.			Coastal fog oases		MF
Chile & Oasis	Moat et al (2021)	Justin Moata, Alfonso Orellana-Garciab, Carolina Tovara, Monica Arakakíb, Ćesar Aranab, Asuncion Canób, Luis Faundezd, Martin Gardnere, Paulina Hechenleitnera, Josefina Heppf, Gwilym Lewisa, Jośe-Manuel Mamanig, María Miyasiroh, OliverQ. Whaley	2021	Seeing through the clouds - Mapping desert fog oasis ecosystems using 20 years of MODIS imagery over Peru and Chile	International Journal of Applied Earth Observations and Geoinformation	103		1-13	10.1016/j.jag.2021.102468	Villa María	-12.134590	-76.9150	Peru	Remote sensing	The desert fog oasis ecosystem of Peru and Chile comprises numerous oases along 3000 km of the Pacific coastal belt, due to their marked seasonality and fog cover they are poorly mapped, which greatly compromises their conservation.	Using 20-years of MODIS data to reliably map the fog oases extent and seasonality. Examination of the main drivers of productivity using generalised linear models.	Over four times more fog oases than previously recorded were discovered and mapped. Fog oases are highly endemic, threatened, yet poorly collected and protected. Assessment of human pressures, conservation efforts, and summary of present plant diversity knowledge.			Coastal fog oases		MF
Chile & Oasis	Moat et al (2021)	Justin Moata, Alfonso Orellana-Garciab, Carolina Tovara, Monica Arakakíb, Ćesar Aranab, Asuncion Canób, Luis Faundezd, Martin Gardnere, Paulina Hechenleitnera, Josefina Heppf, Gwilym Lewisa, Jośe-Manuel Mamanig, María Miyasiroh, OliverQ. Whaley	2021	Seeing through the clouds - Mapping desert fog oasis ecosystems using 20 years of MODIS imagery over Peru and Chile	International Journal of Applied Earth Observations and Geoinformation	103		1-13	10.1016/j.jag.2021.102468	Zorritos	-12.155733	-76.905882	Peru	Remote sensing	The desert fog oasis ecosystem of Peru and Chile comprises numerous oases along 3000 km of the Pacific coastal belt, due to their marked seasonality and fog cover they are poorly mapped, which greatly compromises their conservation.	Using 20-years of MODIS data to reliably map the fog oases extent and seasonality. Examination of the main drivers of productivity using generalised linear models.	Over four times more fog oases than previously recorded were discovered and mapped. Fog oases are highly endemic, threatened, yet poorly collected and protected. Assessment of human pressures, conservation efforts, and summary of present plant diversity knowledge.			Coastal fog oases		MF
Chile & Oasis	Moat et al (2021)	Justin Moata, Alfonso Orellana-Garciab, Carolina Tovara, Monica Arakakíb, Ćesar Aranab, Asuncion Canób, Luis Faundezd, Martin Gardnere, Paulina Hechenleitnera, Josefina Heppf, Gwilym Lewisa, Jośe-Manuel Mamanig, María Miyasiroh, OliverQ. Whaley	2021	Seeing through the clouds - Mapping desert fog oasis ecosystems using 20 years of MODIS imagery over Peru and Chile	International Journal of Applied Earth Observations and Geoinformation	103		1-13	10.1016/j.jag.2021.102468	Pachacamac	-12.1860	-76.8250	Peru	Remote sensing	The desert fog oasis ecosystem of Peru and Chile comprises numerous oases along 3000 km of the Pacific coastal belt, due to their marked seasonality and fog cover they are poorly mapped, which greatly compromises their conservation.	Using 20-years of MODIS data to reliably map the fog oases extent and seasonality. Examination of the main drivers of productivity using generalised linear models.	Over four times more fog oases than previously recorded were discovered and mapped. Fog oases are highly endemic, threatened, yet poorly collected and protected. Assessment of human pressures, conservation efforts, and summary of present plant diversity knowledge.			Coastal fog oases		MF
Chile & Oasis	Moat et al (2021)	Justin Moata, Alfonso Orellana-Garciab, Carolina Tovara, Monica Arakakíb, Ćesar Aranab, Asuncion Canób, Luis Faundezd, Martin Gardnere, Paulina Hechenleitnera, Josefina Heppf, Gwilym Lewisa, Jośe-Manuel Mamanig, María Miyasiroh, OliverQ. Whaley	2021	Seeing through the clouds - Mapping desert fog oasis ecosystems using 20 years of MODIS imagery over Peru and Chile	International Journal of Applied Earth Observations and Geoinformation	103		1-13	10.1016/j.jag.2021.102468	Lurín	-12.1970	-76.7740	Peru	Remote sensing	The desert fog oasis ecosystem of Peru and Chile comprises numerous oases along 3000 km of the Pacific coastal belt, due to their marked seasonality and fog cover they are poorly mapped, which greatly compromises their conservation.	Using 20-years of MODIS data to reliably map the fog oases extent and seasonality. Examination of the main drivers of productivity using generalised linear models.	Over four times more fog oases than previously recorded were discovered and mapped. Fog oases are highly endemic, threatened, yet poorly collected and protected. Assessment of human pressures, conservation efforts, and summary of present plant diversity knowledge.			Coastal fog oases		MF
Chile & Oasis	Moat et al (2021)	Justin Moata, Alfonso Orellana-Garciab, Carolina Tovara, Monica Arakakíb, Ćesar Aranab, Asuncion Canób, Luis Faundezd, Martin Gardnere, Paulina Hechenleitnera, Josefina Heppf, Gwilym Lewisa, Jośe-Manuel Mamanig, María Miyasiroh, OliverQ. Whaley	2021	Seeing through the clouds - Mapping desert fog oasis ecosystems using 20 years of MODIS imagery over Peru and Chile	International Journal of Applied Earth Observations and Geoinformation	103		1-13	10.1016/j.jag.2021.102468	Lúcumo	-12.2030	-76.8850	Peru	Remote sensing	The desert fog oasis ecosystem of Peru and Chile comprises numerous oases along 3000 km of the Pacific coastal belt, due to their marked seasonality and fog cover they are poorly mapped, which greatly compromises their conservation.	Using 20-years of MODIS data to reliably map the fog oases extent and seasonality. Examination of the main drivers of productivity using generalised linear models.	Over four times more fog oases than previously recorded were discovered and mapped. Fog oases are highly endemic, threatened, yet poorly collected and protected. Assessment of human pressures, conservation efforts, and summary of present plant diversity knowledge.			Coastal fog oases		MF
Chile & Oasis	Moat et al (2021)	Justin Moata, Alfonso Orellana-Garciab, Carolina Tovara, Monica Arakakíb, Ćesar Aranab, Asuncion Canób, Luis Faundezd, Martin Gardnere, Paulina Hechenleitnera, Josefina Heppf, Gwilym Lewisa, Jośe-Manuel Mamanig, María Miyasiroh, OliverQ. Whaley	2021	Seeing through the clouds - Mapping desert fog oasis ecosystems using 20 years of MODIS imagery over Peru and Chile	International Journal of Applied Earth Observations and Geoinformation	103		1-13	10.1016/j.jag.2021.102468	Portillo	-12.2557	-76.7820	Peru	Remote sensing	The desert fog oasis ecosystem of Peru and Chile comprises numerous oases along 3000 km of the Pacific coastal belt, due to their marked seasonality and fog cover they are poorly mapped, which greatly compromises their conservation.	Using 20-years of MODIS data to reliably map the fog oases extent and seasonality. Examination of the main drivers of productivity using generalised linear models.	Over four times more fog oases than previously recorded were discovered and mapped. Fog oases are highly endemic, threatened, yet poorly collected and protected. Assessment of human pressures, conservation efforts, and summary of present plant diversity knowledge.			Coastal fog oases		MF
Chile & Oasis	Moat et al (2021)	Justin Moata, Alfonso Orellana-Garciab, Carolina Tovara, Monica Arakakíb, Ćesar Aranab, Asuncion Canób, Luis Faundezd, Martin Gardnere, Paulina Hechenleitnera, Josefina Heppf, Gwilym Lewisa, Jośe-Manuel Mamanig, María Miyasiroh, OliverQ. Whaley	2021	Seeing through the clouds - Mapping desert fog oasis ecosystems using 20 years of MODIS imagery over Peru and Chile	International Journal of Applied Earth Observations and Geoinformation	103		1-13	10.1016/j.jag.2021.102468	Pacta	-12.278324	-76.769762	Peru	Remote sensing	The desert fog oasis ecosystem of Peru and Chile comprises numerous oases along 3000 km of the Pacific coastal belt, due to their marked seasonality and fog cover they are poorly mapped, which greatly compromises their conservation.	Using 20-years of MODIS data to reliably map the fog oases extent and seasonality. Examination of the main drivers of productivity using generalised linear models.	Over four times more fog oases than previously recorded were discovered and mapped. Fog oases are highly endemic, threatened, yet poorly collected and protected. Assessment of human pressures, conservation efforts, and summary of present plant diversity knowledge.			Coastal fog oases		MF
Chile & Oasis	Moat et al (2021)	Justin Moata, Alfonso Orellana-Garciab, Carolina Tovara, Monica Arakakíb, Ćesar Aranab, Asuncion Canób, Luis Faundezd, Martin Gardnere, Paulina Hechenleitnera, Josefina Heppf, Gwilym Lewisa, Jośe-Manuel Mamanig, María Miyasiroh, OliverQ. Whaley	2021	Seeing through the clouds - Mapping desert fog oasis ecosystems using 20 years of MODIS imagery over Peru and Chile	International Journal of Applied Earth Observations and Geoinformation	103		1-13	10.1016/j.jag.2021.102468	Malanche	-12.2947	-76.7234	Peru	Remote sensing	The desert fog oasis ecosystem of Peru and Chile comprises numerous oases along 3000 km of the Pacific coastal belt, due to their marked seasonality and fog cover they are poorly mapped, which greatly compromises their conservation.	Using 20-years of MODIS data to reliably map the fog oases extent and seasonality. Examination of the main drivers of productivity using generalised linear models.	Over four times more fog oases than previously recorded were discovered and mapped. Fog oases are highly endemic, threatened, yet poorly collected and protected. Assessment of human pressures, conservation efforts, and summary of present plant diversity knowledge.			Coastal fog oases		MF
Chile & Oasis	Moat et al (2021)	Justin Moata, Alfonso Orellana-Garciab, Carolina Tovara, Monica Arakakíb, Ćesar Aranab, Asuncion Canób, Luis Faundezd, Martin Gardnere, Paulina Hechenleitnera, Josefina Heppf, Gwilym Lewisa, Jośe-Manuel Mamanig, María Miyasiroh, OliverQ. Whaley	2021	Seeing through the clouds - Mapping desert fog oasis ecosystems using 20 years of MODIS imagery over Peru and Chile	International Journal of Applied Earth Observations and Geoinformation	103		1-13	10.1016/j.jag.2021.102468	Caringa	-12.309618	-76.704816	Peru	Remote sensing	The desert fog oasis ecosystem of Peru and Chile comprises numerous oases along 3000 km of the Pacific coastal belt, due to their marked seasonality and fog cover they are poorly mapped, which greatly compromises their conservation.	Using 20-years of MODIS data to reliably map the fog oases extent and seasonality. Examination of the main drivers of productivity using generalised linear models.	Over four times more fog oases than previously recorded were discovered and mapped. Fog oases are highly endemic, threatened, yet poorly collected and protected. Assessment of human pressures, conservation efforts, and summary of present plant diversity knowledge.			Coastal fog oases		MF
Chile & Oasis	Moat et al (2021)	Justin Moata, Alfonso Orellana-Garciab, Carolina Tovara, Monica Arakakíb, Ćesar Aranab, Asuncion Canób, Luis Faundezd, Martin Gardnere, Paulina Hechenleitnera, Josefina Heppf, Gwilym Lewisa, Jośe-Manuel Mamanig, María Miyasiroh, OliverQ. Whaley	2021	Seeing through the clouds - Mapping desert fog oasis ecosystems using 20 years of MODIS imagery over Peru and Chile	International Journal of Applied Earth Observations and Geoinformation	103		1-13	10.1016/j.jag.2021.102468	Jime	-12.339077	-76.751736	Peru	Remote sensing	The desert fog oasis ecosystem of Peru and Chile comprises numerous oases along 3000 km of the Pacific coastal belt, due to their marked seasonality and fog cover they are poorly mapped, which greatly compromises their conservation.	Using 20-years of MODIS data to reliably map the fog oases extent and seasonality. Examination of the main drivers of productivity using generalised linear models.	Over four times more fog oases than previously recorded were discovered and mapped. Fog oases are highly endemic, threatened, yet poorly collected and protected. Assessment of human pressures, conservation efforts, and summary of present plant diversity knowledge.			Coastal fog oases		MF
Chile & Oasis	Moat et al (2021)	Justin Moata, Alfonso Orellana-Garciab, Carolina Tovara, Monica Arakakíb, Ćesar Aranab, Asuncion Canób, Luis Faundezd, Martin Gardnere, Paulina Hechenleitnera, Josefina Heppf, Gwilym Lewisa, Jośe-Manuel Mamanig, María Miyasiroh, OliverQ. Whaley	2021	Seeing through the clouds - Mapping desert fog oasis ecosystems using 20 years of MODIS imagery over Peru and Chile	International Journal of Applied Earth Observations and Geoinformation	103		1-13	10.1016/j.jag.2021.102468	Cicasos	-12.3660	-76.6980	Peru	Remote sensing	The desert fog oasis ecosystem of Peru and Chile comprises numerous oases along 3000 km of the Pacific coastal belt, due to their marked seasonality and fog cover they are poorly mapped, which greatly compromises their conservation.	Using 20-years of MODIS data to reliably map the fog oases extent and seasonality. Examination of the main drivers of productivity using generalised linear models.	Over four times more fog oases than previously recorded were discovered and mapped. Fog oases are highly endemic, threatened, yet poorly collected and protected. Assessment of human pressures, conservation efforts, and summary of present plant diversity knowledge.			Coastal fog oases		MF
Chile & Oasis	Moat et al (2021)	Justin Moata, Alfonso Orellana-Garciab, Carolina Tovara, Monica Arakakíb, Ćesar Aranab, Asuncion Canób, Luis Faundezd, Martin Gardnere, Paulina Hechenleitnera, Josefina Heppf, Gwilym Lewisa, Jośe-Manuel Mamanig, María Miyasiroh, OliverQ. Whaley	2021	Seeing through the clouds - Mapping desert fog oasis ecosystems using 20 years of MODIS imagery over Peru and Chile	International Journal of Applied Earth Observations and Geoinformation	103		1-13	10.1016/j.jag.2021.102468	La Paloma	-12.446140	-76.716684	Peru	Remote sensing	The desert fog oasis ecosystem of Peru and Chile comprises numerous oases along 3000 km of the Pacific coastal belt, due to their marked seasonality and fog cover they are poorly mapped, which greatly compromises their conservation.	Using 20-years of MODIS data to reliably map the fog oases extent and seasonality. Examination of the main drivers of productivity using generalised linear models.	Over four times more fog oases than previously recorded were discovered and mapped. Fog oases are highly endemic, threatened, yet poorly collected and protected. Assessment of human pressures, conservation efforts, and summary of present plant diversity knowledge.			Coastal fog oases		MF
Chile & Oasis	Moat et al (2021)	Justin Moata, Alfonso Orellana-Garciab, Carolina Tovara, Monica Arakakíb, Ćesar Aranab, Asuncion Canób, Luis Faundezd, Martin Gardnere, Paulina Hechenleitnera, Josefina Heppf, Gwilym Lewisa, Jośe-Manuel Mamanig, María Miyasiroh, OliverQ. Whaley	2021	Seeing through the clouds - Mapping desert fog oasis ecosystems using 20 years of MODIS imagery over Peru and Chile	International Journal of Applied Earth Observations and Geoinformation	103		1-13	10.1016/j.jag.2021.102468	Calango	-12.5280	-76.6300	Peru	Remote sensing	The desert fog oasis ecosystem of Peru and Chile comprises numerous oases along 3000 km of the Pacific coastal belt, due to their marked seasonality and fog cover they are poorly mapped, which greatly compromises their conservation.	Using 20-years of MODIS data to reliably map the fog oases extent and seasonality. Examination of the main drivers of productivity using generalised linear models.	Over four times more fog oases than previously recorded were discovered and mapped. Fog oases are highly endemic, threatened, yet poorly collected and protected. Assessment of human pressures, conservation efforts, and summary of present plant diversity knowledge.			Coastal fog oases		MF
Chile & Oasis	Moat et al (2021)	Justin Moata, Alfonso Orellana-Garciab, Carolina Tovara, Monica Arakakíb, Ćesar Aranab, Asuncion Canób, Luis Faundezd, Martin Gardnere, Paulina Hechenleitnera, Josefina Heppf, Gwilym Lewisa, Jośe-Manuel Mamanig, María Miyasiroh, OliverQ. Whaley	2021	Seeing through the clouds - Mapping desert fog oasis ecosystems using 20 years of MODIS imagery over Peru and Chile	International Journal of Applied Earth Observations and Geoinformation	103		1-13	10.1016/j.jag.2021.102468	Lapa Lapa	-12.579266	-76.629603	Peru	Remote sensing	The desert fog oasis ecosystem of Peru and Chile comprises numerous oases along 3000 km of the Pacific coastal belt, due to their marked seasonality and fog cover they are poorly mapped, which greatly compromises their conservation.	Using 20-years of MODIS data to reliably map the fog oases extent and seasonality. Examination of the main drivers of productivity using generalised linear models.	Over four times more fog oases than previously recorded were discovered and mapped. Fog oases are highly endemic, threatened, yet poorly collected and protected. Assessment of human pressures, conservation efforts, and summary of present plant diversity knowledge.			Coastal fog oases		MF
Chile & Oasis	Moat et al (2021)	Justin Moata, Alfonso Orellana-Garciab, Carolina Tovara, Monica Arakakíb, Ćesar Aranab, Asuncion Canób, Luis Faundezd, Martin Gardnere, Paulina Hechenleitnera, Josefina Heppf, Gwilym Lewisa, Jośe-Manuel Mamanig, María Miyasiroh, OliverQ. Whaley	2021	Seeing through the clouds - Mapping desert fog oasis ecosystems using 20 years of MODIS imagery over Peru and Chile	International Journal of Applied Earth Observations and Geoinformation	103		1-13	10.1016/j.jag.2021.102468	Piedra Campana	-12.633885	-76.662889	Peru	Remote sensing	The desert fog oasis ecosystem of Peru and Chile comprises numerous oases along 3000 km of the Pacific coastal belt, due to their marked seasonality and fog cover they are poorly mapped, which greatly compromises their conservation.	Using 20-years of MODIS data to reliably map the fog oases extent and seasonality. Examination of the main drivers of productivity using generalised linear models.	Over four times more fog oases than previously recorded were discovered and mapped. Fog oases are highly endemic, threatened, yet poorly collected and protected. Assessment of human pressures, conservation efforts, and summary of present plant diversity knowledge.			Coastal fog oases		MF
Chile & Oasis	Moat et al (2021)	Justin Moata, Alfonso Orellana-Garciab, Carolina Tovara, Monica Arakakíb, Ćesar Aranab, Asuncion Canób, Luis Faundezd, Martin Gardnere, Paulina Hechenleitnera, Josefina Heppf, Gwilym Lewisa, Jośe-Manuel Mamanig, María Miyasiroh, OliverQ. Whaley	2021	Seeing through the clouds - Mapping desert fog oasis ecosystems using 20 years of MODIS imagery over Peru and Chile	International Journal of Applied Earth Observations and Geoinformation	103		1-13	10.1016/j.jag.2021.102468	Asia sector A	-12.721186	-76.538103	Peru	Remote sensing	The desert fog oasis ecosystem of Peru and Chile comprises numerous oases along 3000 km of the Pacific coastal belt, due to their marked seasonality and fog cover they are poorly mapped, which greatly compromises their conservation.	Using 20-years of MODIS data to reliably map the fog oases extent and seasonality. Examination of the main drivers of productivity using generalised linear models.	Over four times more fog oases than previously recorded were discovered and mapped. Fog oases are highly endemic, threatened, yet poorly collected and protected. Assessment of human pressures, conservation efforts, and summary of present plant diversity knowledge.			Coastal fog oases		MF
Chile & Oasis	Moat et al (2021)	Justin Moata, Alfonso Orellana-Garciab, Carolina Tovara, Monica Arakakíb, Ćesar Aranab, Asuncion Canób, Luis Faundezd, Martin Gardnere, Paulina Hechenleitnera, Josefina Heppf, Gwilym Lewisa, Jośe-Manuel Mamanig, María Miyasiroh, OliverQ. Whaley	2021	Seeing through the clouds - Mapping desert fog oasis ecosystems using 20 years of MODIS imagery over Peru and Chile	International Journal of Applied Earth Observations and Geoinformation	103		1-13	10.1016/j.jag.2021.102468	Mala	-12.739718	-76.547946	Peru	Remote sensing	The desert fog oasis ecosystem of Peru and Chile comprises numerous oases along 3000 km of the Pacific coastal belt, due to their marked seasonality and fog cover they are poorly mapped, which greatly compromises their conservation.	Using 20-years of MODIS data to reliably map the fog oases extent and seasonality. Examination of the main drivers of productivity using generalised linear models.	Over four times more fog oases than previously recorded were discovered and mapped. Fog oases are highly endemic, threatened, yet poorly collected and protected. Assessment of human pressures, conservation efforts, and summary of present plant diversity knowledge.			Coastal fog oases		MF
Chile & Oasis	Moat et al (2021)	Justin Moata, Alfonso Orellana-Garciab, Carolina Tovara, Monica Arakakíb, Ćesar Aranab, Asuncion Canób, Luis Faundezd, Martin Gardnere, Paulina Hechenleitnera, Josefina Heppf, Gwilym Lewisa, Jośe-Manuel Mamanig, María Miyasiroh, OliverQ. Whaley	2021	Seeing through the clouds - Mapping desert fog oasis ecosystems using 20 years of MODIS imagery over Peru and Chile	International Journal of Applied Earth Observations and Geoinformation	103		1-13	10.1016/j.jag.2021.102468	Asia sector B	-12.759801	-76.468806	Peru	Remote sensing	The desert fog oasis ecosystem of Peru and Chile comprises numerous oases along 3000 km of the Pacific coastal belt, due to their marked seasonality and fog cover they are poorly mapped, which greatly compromises their conservation.	Using 20-years of MODIS data to reliably map the fog oases extent and seasonality. Examination of the main drivers of productivity using generalised linear models.	Over four times more fog oases than previously recorded were discovered and mapped. Fog oases are highly endemic, threatened, yet poorly collected and protected. Assessment of human pressures, conservation efforts, and summary of present plant diversity knowledge.			Coastal fog oases		MF
Chile & Oasis	Moat et al (2021)	Justin Moata, Alfonso Orellana-Garciab, Carolina Tovara, Monica Arakakíb, Ćesar Aranab, Asuncion Canób, Luis Faundezd, Martin Gardnere, Paulina Hechenleitnera, Josefina Heppf, Gwilym Lewisa, Jośe-Manuel Mamanig, María Miyasiroh, OliverQ. Whaley	2021	Seeing through the clouds - Mapping desert fog oasis ecosystems using 20 years of MODIS imagery over Peru and Chile	International Journal of Applied Earth Observations and Geoinformation	103		1-13	10.1016/j.jag.2021.102468	Quilmaná	-12.8380	-76.4530	Peru	Remote sensing	The desert fog oasis ecosystem of Peru and Chile comprises numerous oases along 3000 km of the Pacific coastal belt, due to their marked seasonality and fog cover they are poorly mapped, which greatly compromises their conservation.	Using 20-years of MODIS data to reliably map the fog oases extent and seasonality. Examination of the main drivers of productivity using generalised linear models.	Over four times more fog oases than previously recorded were discovered and mapped. Fog oases are highly endemic, threatened, yet poorly collected and protected. Assessment of human pressures, conservation efforts, and summary of present plant diversity knowledge.			Coastal fog oases		MF
[truncated: 3,708 more rows]
