# Supplementary material for: Mapping the global distribution and conservation status of oases—ecosystems of pivotal biocultural relevance
Source: PeerJ journal article supplement (doi:10.7717/peerj.18884), 2025-02-28
Supplement: Sup_Table_S4.xls [file Sup_Table_S4.xls]

## Sheet: savedrecs
Publication Type	Authors	Book Authors	Book Editors	Book Group Authors	Author Full Names	Book Author Full Names	Group Authors	Article Title	Source Title	Book Series Title	Book Series Subtitle	Language	Document Type	Conference Title	Conference Date	Conference Location	Conference Sponsor	Conference Host	Author Keywords	Keywords Plus	Abstract	Addresses	Affiliations	Reprint Addresses	Email Addresses	Researcher Ids	ORCIDs	Funding Orgs	Funding Name Preferred	Funding Text	Cited References	Cited Reference Count	Times Cited, WoS Core	Times Cited, All Databases	180 Day Usage Count	Since 2013 Usage Count	Publisher	Publisher City	Publisher Address	ISSN	eISSN	ISBN	Journal Abbreviation	Journal ISO Abbreviation	Publication Date	Publication Year	Volume	Issue	Part Number
J	Rallabandi, VPS; Seetharaman, K				Rallabandi, V. P. Subramanyam; Seetharaman, Krishnamoorthy			Deep learning-based classification of healthy aging controls, mild cognitive impairment and Alzheimer's disease using fusion of MRI-PET imaging	BIOMEDICAL SIGNAL PROCESSING AND CONTROL																															1746-8094	1746-8108				FEB	2023	80		1
J	Balasundaram, A; Srinivasan, S; Prasad, A; Malik, J; Kumar, A				Balasundaram, A.; Srinivasan, Sruthi; Prasad, A.; Malik, Jahan; Kumar, Ayush			Hippocampus Segmentation-Based Alzheimer's Disease Diagnosis and Classification of MRI Images	ARABIAN JOURNAL FOR SCIENCE AND ENGINEERING																															2193-567X	2191-4281
J	Ahumada, MF; Sanchez, MA; Vargas, L; Filipovich, R; Martinez, P; Viramonte, JG				Ahumada, M. F.; Sanchez, M. A.; Vargas, L.; Filipovich, R.; Martinez, P.; Viramonte, J. G.			Joint interpretation of gravity and airborne magnetic data along the Calama-Olacapato-Toro fault system (Central Puna, NW Argentina): Structural and geothermal significance	GEOTHERMICS																	Filipovich, Rubén/HHT-0232-2022	Filipovich, Rubén/0000-0003-2177-6097; Sanchez, Marcos/0000-0002-9708-7004													0375-6505	1879-3576				JAN	2023	107
J	Chen, QT; Jia, L; Menenti, M; Hu, GC; Wang, K; Yi, ZW; Zhou, J; Peng, F; Ma, SX; You, QA; Chen, XJ; Xue, X				Chen, Qiting; Jia, Li; Menenti, Massimo; Hu, Guangcheng; Wang, Kun; Yi, Zhiwei; Zhou, Jie; Peng, Fei; Ma, Shaoxiu; You, Quangang; Chen, Xiaojie; Xue, Xian			A data-driven high spatial resolution model of biomass accumulation and crop yield: Application to a fragmented desert-oasis agroecosystem	ECOLOGICAL MODELLING																		Menenti, Massimo/0000-0001-9176-4556													0304-3800	1872-7026				JAN	2023	475
J	Farghly, MFA; Elsagheer, MA; Jghef, MM; Taha, AE; Abd El-Hack, ME; Jaremko, M; El-Tarabily, KA; Shabaan, M				Farghly, Mohamed F. A.; Elsagheer, Mohamed A.; Jghef, Muthana M.; Taha, Ayman E.; Abd El-Hack, Mohamed E.; Jaremko, Mariusz; El-Tarabily, Khaled A.; Shabaan, Mahmoud			Consequences of supplementing duck's diet with charcoal on carcass criteria, meat quality, nutritional composition, and bacterial load	POULTRY SCIENCE																	; Abd El-Hack, Mohamed/P-2065-2014	El-Tarabily, khaled/0000-0002-8189-7088; Abd El-Hack, Mohamed/0000-0002-2831-8534; Jaremko, Mariusz/0000-0002-0787-702X													0032-5791	1525-3171				JAN	2023	102	1
J	Prihoda, D; Maamary, J; Waight, A; Juan, V; Fayadat-Dilman, L; Svozil, D; Bitton, DA				Prihoda, David; Maamary, Jad; Waight, Andrew; Juan, Veronica; Fayadat-Dilman, Laurence; Svozil, Daniel; Bitton, Danny A.			BioPhi: A platform for antibody design, humanization, and humanness evaluation based on natural antibody repertoires and deep learning	MABS																	Svozil, Daniel/D-4407-2009	Svozil, Daniel/0000-0003-2577-5163; Prihoda, David/0000-0003-0083-7428													1942-0862	1942-0870				DEC 31	2022	14	1
J	Kouzbour, S; Gourich, B; Gros, F; Vial, C; Stiriba, Y				Kouzbour, Sanaa; Gourich, Bouchaib; Gros, Fabrice; Vial, Christophe; Stiriba, Youssef			Purification of industrial wet phosphoric acid solution by sulfide precipitation in batch and continuous modes: Performance analysis, kinetic modeling, and precipitate characterization	JOURNAL OF CLEANER PRODUCTION																															0959-6526	1879-1786				DEC 20	2022	380		2
J	Saarni, SE; Rosenstrom, T; Stenberg, JH; Plattonen, A; Holi, M; Ekelund, J; Grano, N; Komsi, N; Saarni, SI				Saarni, Suoma E.; Rosenstrom, Tom; Stenberg, Jan-Henry; Plattonen, Aino; Holi, Matti; Ekelund, Jesper; Grano, Niklas; Komsi, Niina; Saarni, Samuli, I			Finnish Psychotherapy Quality Register: rationale, development, and baseline results	NORDIC JOURNAL OF PSYCHIATRY																															0803-9488	1502-4725
J	Delgado-Baquerizo, M; Hu, HW; Maestre, FT; Guerra, CA; Eisenhauer, N; Eldridge, DJ; Zhu, YG; Chen, QL; Trivedi, P; Du, S; Makhalanyane, TP; Verma, JP; Gozalo, B; Ochoa, V; Asensio, S; Wang, L; Zaady, E; Illan, JG; Siebe, C; Grebenc, T; Zhou, XB; Liu, YR; Bamigboye, AR; Blanco-Pastor, JL; Duran, J; Rodriguez, A; Mamet, S; Alfaro, F; Abades, S; Teixido, AL; Penaloza-Bojaca, GF; Molina-Montenegro, M…				Delgado-Baquerizo, Manuel; Hu, Hang-Wei; Maestre, Fernando T.; Guerra, Carlos A.; Eisenhauer, Nico; Eldridge, David J.; Zhu, Yong-Guan; Chen, Qing-Lin; Trivedi, Pankaj; Du, Shuai; Makhalanyane, Thulani P.; Verma, Jay Prakash; Gozalo, Beatriz; Ochoa, Victoria; Asensio, Sergio; Wang, Ling; Zaady, Eli; Illan, Javier G.; Siebe, Christina; Grebenc, Tine; Zhou, Xiaobing; Liu, Yu-Rong; Bamigboye, Adebol…			The global distribution and environmental drivers of the soil antibiotic resistome	MICROBIOME																	Rodriguez Pereiras, Alexandra/C-2879-2015; TEIXIDO, ALBERTO L/A-9551-2015; Hayes, Patrick/D-4679-2014	Rodriguez Pereiras, Alexandra/0000-0001-5849-8778; Asensio, Sergio/0000-0003-4376-2964; TEIXIDO, ALBERTO L/0000-0001-8009-1237; Alfaro Ayllon, Fernando Daniel/0000-0003-2922-1838; Hayes, Patrick/0000-0001-7554-4588													2049-2618					DEC 12	2022	10	1
J	Guevara-Betancourt, R; Yutsis, V; Varley, N; Almaguer, J; Alvarez, R; Calderon-Moctezuma, A; Sieck, P				Guevara-Betancourt, Randall; Yutsis, Vsevolod; Varley, Nick; Almaguer, Joselin; Alvarez, Roman; Calderon-Moctezuma, Armando; Sieck, Pascal			Insights into the plumbing system of Colima Volcanic Complex from geophysical evidence	JOURNAL OF VOLCANOLOGY AND GEOTHERMAL RESEARCH																															0377-0273	1872-6097				JAN	2023	433
J	Garg, N; Garg, R; Anand, A; Baths, V				Garg, Nikhil; Garg, Rohit; Anand, Apoorv; Baths, Veeky			Decoding the neural signatures of valence and arousal from portable EEG headset	FRONTIERS IN HUMAN NEUROSCIENCE																															1662-5161					DEC 6	2022	16
J	Tatekawa, H; Matsushita, S; Ueda, D; Takita, H; Horiuchi, D; Atsukawa, N; Morishita, Y; Tsukamoto, T; Shimono, T; Miki, Y				Tatekawa, Hiroyuki; Matsushita, Shu; Ueda, Daiju; Takita, Hirotaka; Horiuchi, Daisuke; Atsukawa, Natsuko; Morishita, Yuka; Tsukamoto, Taro; Shimono, Taro; Miki, Yukio			Improved reproducibility of diffusion tensor image analysis along the perivascular space (DTI-ALPS) index: an analysis of reorientation technique of the OASIS-3 dataset	JAPANESE JOURNAL OF RADIOLOGY																	takita, hirotaka/HLG-6249-2023														1867-1071	1867-108X
J	Ciacci, MB; Micheloud, NG; Levy, MRS; Rodriguez, M; Gariglio, NF; Imhoff, S				Ciacci, Maria Belen; Micheloud, Norma Guadalupe; Levy, Mauro Roberto Silvestre; Rodriguez, Marianela; Gariglio, Norberto Francisco; Imhoff, Silvia			Advantages of Seeding Annual and Perennial Cover Crops Between Peach Rows	JOURNAL OF SOIL SCIENCE AND PLANT NUTRITION																		Micheloud, Norma Guadalupe/0000-0002-5646-1469; Imhoff, Silvia/0000-0001-7330-9728													0718-9508	0718-9516
J	Tudi, M; Jiang, FQ; Wang, L; Li, HR; Tong, SM; Yu, JP; Meng, M; Yang, LS; Ali, MU; Yu, QJ; Ruan, HD				Tudi, Muyesaier; Jiang, Fengqing; Wang, Li; Li, Hairong; Tong, Shuangmei; Yu, Jiangping; Meng, Min; Yang, Lin Sheng; Ali, Muhammad Ubaid; Yu, Qiming Jimmy; Ruan, Huada Daniel			Distribution Characteristics and Influencing Factors of Bio-elements in the Human Hair of Uyghur Communities in an Oasis Area of Xinjiang, China	BIOLOGICAL TRACE ELEMENT RESEARCH																															0163-4984	1559-0720
J	Antoshkina, AI; Leonova, LV; Simakova, YS				Antoshkina, A. I.; Leonova, L. V.; Simakova, Yu. S.			Lower Maeotian Bryozoan Bioherms of Cape Kazantip, Crimea: A New Concept of the Paleoecological Environment of Their Origin	LITHOLOGY AND MINERAL RESOURCES																															0024-4902	1608-3229				DEC	2022	57	6
J	Calvo, FE; Trentacoste, ER; Silvente, ST				Calvo, Franco Emmanuel; Trentacoste, Eduardo Rafael; Silvente, Sonia Teresa			Vegetative growth, yield, and crop water productivity response to different irrigation regimes in high density walnut orchards (Juglans regia L.) in a semi-arid environment in Argentina	AGRICULTURAL WATER MANAGEMENT																		Calvo, Franco/0000-0002-4335-658X													0378-3774	1873-2283				DEC 1	2022	274
J	Fedorova, OS; Orlovskaya, VV; Krasikova, RN				Fedorova, Olga S.; Orlovskaya, Viktoriya V.; Krasikova, Raisa N.			Automated Optimized Synthesis of [F-18]FLT Using Non-Basic Phase-Transfer Catalyst with Reduced Precursor Amount	MOLECULES																																1420-3049				DEC	2022	27	23
J	Guettouchi, A; Ahmedani, MS; Redaoui, L; Yahiaoui, A				Guettouchi, Ahlem; Ahmedani, Muhammad Shoaib; Redaoui, Lamya; Yahiaoui, Aoulia			THE EFFECT OF SOME HORMONES ON THE IN VITRO CULTURE OF DATE PALM (PHOENIX DACTYLIFERA L.) OF BOU-SAADA, ALGERIA	PAKISTAN JOURNAL OF BOTANY																															0556-3321	2070-3368				DEC	2022	54	6
J	Husin, NZ; Ahmad, MZ; Akhir, MKM				Husin, Nurain Zulaikha; Ahmad, Muhammad Zaini; Akhir, Mohd Kamalrulzaman Md			Incorporating Fuzziness in the Traditional Runge-Kutta Cash-Karp Method and Its Applications to Solve Autonomous and Non-Autonomous Fuzzy Differential Equations	MATHEMATICS																																2227-7390				DEC	2022	10	24
J	Gomez-Moreno, FJ; Alonso-Blanco, E; Diaz, E; Coz, E; Molero, F; Nunez, L; Palacios, M; Barreiro, M; Fernandez, J; Salvador, P; Pineiro-Iglesias, M; Lopez-Mahia, P; Borras, E; Vera, T; Munoz, A; Tritscher, T; Schmitt, S; Artinano, B				Javier Gomez-Moreno, Francisco; Alonso-Blanco, Elisabeth; Diaz, Elias; Coz, Esther; Molero, Francisco; Nunez, Lourdes; Palacios, Magdalena; Barreiro, Marcos; Fernandez, Javier; Salvador, Pedro; Pineiro-Iglesias, Maria; Lopez-Mahia, Purificacion; Borras, Esther; Vera, Teresa; Munoz, Amalia; Tritscher, Torsten; Schmitt, Sebastian; Artinano, Begona			On the influence of VOCs on new particle growth in a Continental-Mediterranean region	ENVIRONMENTAL RESEARCH COMMUNICATIONS																	Gomez-Moreno, Francisco/K-1636-2014; VERA, TERESA/M-5139-2018; Nunez, Lourdes/J-7101-2017; Munoz, Amalia/O-8140-2018	VERA, TERESA/0000-0002-9660-3898; Nunez, Lourdes/0000-0002-7809-4890; Munoz, Amalia/0000-0002-3618-7327													2515-7620					DEC 1	2022	4	12
J	Shcherbakova, VV; Vodovozov, VY; Zhidkov, GV; Aphinogenova, NA; Sal'naya, NV; Leichenkov, GL				Shcherbakova, V. V.; Vodovozov, V. Yu.; Zhidkov, G. V.; Aphinogenova, N. A.; Sal'naya, N. V.; Leichenkov, G. L.			Ultra-Low Geomagnetic Field Intensity in the Mesoproterozoic Based on the Dike Complex Rocks of the Bunger Oasis (1133 Ma, East Antarctica)	IZVESTIYA-PHYSICS OF THE SOLID EARTH																															1069-3513	1555-6506				DEC	2022	58	6
J	Tariq, A; Graciano, C; Sardans, J; Ullah, A; Zeng, FJ; Ullah, I; Ahmed, Z; Ali, S; Al-Bakre, DA; Zhang, ZH; Bai, YF; Wang, WQ; Penuelas, J				Tariq, Akash; Graciano, Corina; Sardans, Jordi; Ullah, Abd; Zeng, Fanjiang; Ullah, Ihteram; Ahmed, Zeeshan; Ali, Sikandar; Al-Bakre, Dhafer A.; Zhang, Zhihao; Bai, Yanfu; Wang, Weiqi; Penuelas, Josep			Decade-long unsustainable vegetation management practices increase macronutrient losses from the plant-soil system in the Taklamakan Desert	ECOLOGICAL INDICATORS																	Albakre, Dhafer/GXH-6523-2022	Albakre, Dhafer/0000-0003-3564-0721													1470-160X	1872-7034				DEC	2022	145
J	Trowbridge, ER; Subbarao, S; Melanson, M; Childress, RM; Hullfish, KL; Vaughan, M				Trowbridge, Elisa R.; Subbarao, Shalini; Melanson, Michelle; Childress, Reba Moyer; Hullfish, Kathie L.; Vaughan, Monique			Self-assessment of nursing preparedness and knowledge in the care of patients with obstetric anal sphincter injuries and utilization of a computer-based learning module for continued nursing education in the United States	MIDWIFERY																		Subbarao, Shalini/0000-0001-5371-4910; Vaughan, Monique/0000-0003-2480-0267													0266-6138	1532-3099				DEC	2022	115
J	Yakushev, AV; Velichko, NV; Fedorov-Davydov, DG; Mergelov, NS; Lupachev, AV; Rabochaya, DE; Belosokhov, AF; Soina, VS				Yakushev, A. V.; Velichko, N. V.; Fedorov-Davydov, D. G.; Mergelov, N. S.; Lupachev, A. V.; Rabochaya, D. E.; Belosokhov, A. F.; Soina, V. S.			Organization of Microbial Communities in Soils: Experiment with Fouling Glasses in Extreme Terrestrial Landscapes of Antarctica	EURASIAN SOIL SCIENCE																															1064-2293	1556-195X				DEC	2022	55	12
J	Maestre, FT; Le Bagousse-Pinguet, Y; Delgado-Baquerizo, M; Eldridge, DJ; Saiz, H; Berdugo, M; Gozalo, B; Ochoa, V; Guirado, E; Garcia-Gomez, M; Valencia, E; Gaitan, JJ; Asensio, S; Mendoza, BJ; Plaza, C; Diaz-Martinez, P; Rey, A; Hu, HW; He, JZ; Wang, JT; Lehmann, A; Rillig, MC; Cesarz, S; Eisenhauer, N; Martinez-Valderrama, J; Moreno-Jimenez, E; Sala, O; Abedi, M; Ahmadian, N; Alados, CL; Aramay…				Maestre, Fernando T.; Le Bagousse-Pinguet, Yoann; Delgado-Baquerizo, Manuel; Eldridge, David J.; Saiz, Hugo; Berdugo, Miguel; Gozalo, Beatriz; Ochoa, Victoria; Guirado, Emilio; Garcia-Gomez, Miguel; Valencia, Enrique; Gaitan, Juan J.; Asensio, Sergio; Mendoza, Betty J.; Plaza, Cesar; Diaz-Martinez, Paloma; Rey, Ana; Hu, Hang-Wei; He, Ji-Zheng; Wang, Jun-Tao; Lehmann, Anika; Rillig, Matthias C.; C…			Grazing and ecosystem service delivery in global drylands	SCIENCE																	Greenville, Aaron/G-9718-2013; Frank, Anke Sybille Keiko/J-7789-2014; Rodriguez Pereiras, Alexandra/C-2879-2015; Throop, Heather/D-6391-2012; Saiz, Hugo/K-8724-2014; Wang, Jun-Tao/O-4423-2015; Rolo, Victor/H-1713-2016; Martinez-Valderrama, Jaime/L-1891-2015; Kobel, Melanie/E-9256-2015	Greenville, Aaron/0000-0002-0113-4778; Frank, Anke Sybille Keiko/0000-0002-0177-4898; Asensio, Sergio/0000-0003-4376-2964; Rodriguez Pereiras, Alexandra/0000-0001-5849-8778; Moreno, Gerardo/0000-0001-8053-2696; Throop, Heather/0000-0002-7963-4342; Jeltsch, Florian/0000-0002-4670-6469; Rubalcaba, Juan G./0000-0003-4646-070X; Saiz, Hugo/0000-0002-7568-2996; Wang, Jun-Tao/0000-0002-1822-2176; Rolo, …													0036-8075	1095-9203				NOV 25	2022	378	6622
J	Zhukovsky, P; Coughlan, G; Buckley, R; Grady, C; Voineskos, AN				Zhukovsky, Peter; Coughlan, Gillian; Buckley, Rachel; Grady, Cheryl; Voineskos, Aristotle N. N.			Connectivity between default mode and frontoparietal networks mediates the association between global amyloid-beta and episodic memory	HUMAN BRAIN MAPPING																		Zhukovsky, Peter/0000-0002-7181-2095													1065-9471	1097-0193
J	Nienkerke, I; Patt, A				Nienkerke, Inga; Patt, Anthony			From wasteland to oasis: Transformative effects of trees on farmland and livelihoods	LAND DEGRADATION & DEVELOPMENT																		Nienkerke, Inga/0000-0001-6883-4579													1085-3278	1099-145X				DEC	2022	33	18
J	Dietz, HP; Shek, KL; Low, GK				Dietz, H. P.; Shek, K. L.; Low, G. K.			Validation of new ultrasound algorithm for estimating prevalence of anal sphincter trauma in a urogynecological population	ULTRASOUND IN OBSTETRICS & GYNECOLOGY																															0960-7692	1469-0705
J	Garcia-Cardenas, M; Espejel-Guzman, A; Antonio-Villa, NE; Michel-Vasquez, A; Hernandez-Sandoval, S; Serrano-Roman, J; Fernandez-Badillo, V; Solorzano-Pinot, E; Zagal-Cardoso, D; Keirns, C; Alexanderson-Rosas, E; Espinola-Zavaleta, N				Garcia-Cardenas, Mauricio; Espejel-Guzman, Adrian; Eduardo Antonio-Villa, Neftali; Michel-Vasquez, Ana; Hernandez-Sandoval, Salvador; Serrano-Roman, Javier; Fernandez-Badillo, Valente; Solorzano-Pinot, Enrique; Zagal-Cardoso, Daniel; Keirns, Candace; Alexanderson-Rosas, Erick; Espinola-Zavaleta, Nilda			Diagnosis, performance and added value of assessing ventricular dyssynchrony by phase analysis in patients with three-vessel disease: A single-center cross-sectional study in Mexico	JOURNAL OF NUCLEAR CARDIOLOGY																															1071-3581	1532-6551
J	Zhao, YG; Zhang, FH; Mickan, B; Wang, D				Zhao, Yaguang; Zhang, Fenghua; Mickan, Bede; Wang, Dan			Inoculation of wheat with Bacillus sp. wp-6 altered amino acid and flavonoid metabolism and promoted plant growth	PLANT CELL REPORTS																															0721-7714	1432-203X
J	Fang, GH; Yang, J; Li, Z; Chen, YN; Duan, WL; Amory, C; De Maeyer, P				Fang, Gonghuan; Yang, Jing; Li, Zhi; Chen, Yaning; Duan, Weili; Amory, Charles; De Maeyer, Philippe			Shifting in the global flood timing	SCIENTIFIC REPORTS																	DUAN, Weili/A-1928-2019	DUAN, Weili/0000-0002-1503-8066													2045-2322					NOV 7	2022	12	1
J	Zhang, ZT; Sheng, SNM; Kempen, JH; Fabiani, C; Arora, A; Gupta, V; Tsui, E; Cimino, L; Symes, RJ; Dell, J; Finger, RP; Heinz, C; Agrawal, R				Zhang, Zheting; Sheng, Sean Ng Ming; Kempen, John H.; Fabiani, Claudia; Arora, Atul; Gupta, Vishali; Tsui, Edmund; Cimino, Luca; Symes, Richard J.; Dell, Jennifer; Finger, Robert P.; Heinz, Carsten; Agrawal, Rupesh			Uveitis Registries - A Digital Tool for Patient Care, Education, Research, and Collaboration	OCULAR IMMUNOLOGY AND INFLAMMATION																	Cimino, Luca/AAA-7523-2021; Fabiani, Claudia/L-8288-2013	Cimino, Luca/0000-0001-7956-9950; Arora, Atul/0000-0002-2192-8479; Fabiani, Claudia/0000-0003-4515-7741; Gupta, Vishali/0000-0001-8216-4620													0927-3948	1744-5078
J	Sarmiento-Vizcaino, A; Martin, J; Ortiz-Lopez, FJ; Reyes, F; Garcia, LA; Blanco, G				Sarmiento-Vizcaino, Aida; Martin, Jesus; Javier Ortiz-Lopez, Francisco; Reyes, Fernando; Garcia, Luis A.; Blanco, Gloria			Natural products, including a new caboxamycin, from Streptomyces and other Actinobacteria isolated in Spain from storm clouds transported by Northern winds of Arctic origin	FRONTIERS IN CHEMISTRY																	Reyes, Fernando/G-4027-2013; Blanco, Gloria/K-5850-2014; Martin Serrano, Jesus M./M-1937-2014	Reyes, Fernando/0000-0003-1607-5106; Martin Serrano, Jesus M./0000-0001-7487-2790													2296-2646					NOV 3	2022	10
J	Alvarez, E; Losa, SN; Bracher, A; Thoms, S; Volker, C				Alvarez, Eva; Losa, Svetlana N.; Bracher, Astrid; Thoms, Silke; Voelker, Christoph			Phytoplankton Light Absorption Impacted by Photoprotective Carotenoids in a Global Ocean Spectrally-Resolved Biogeochemistry Model	JOURNAL OF ADVANCES IN MODELING EARTH SYSTEMS																	amplification, - Arctic/AAU-6640-2020; Bracher, Astrid/I-2672-2013; Alvarez, Eva/C-3612-2018; voelker, christoph/I-7891-2012	Bracher, Astrid/0000-0003-3025-5517; Alvarez, Eva/0000-0002-6776-1029; voelker, christoph/0000-0003-3032-114X														1942-2466				NOV	2022	14	11
J	Brande, J; Crossfield, IJM; Kreidberg, L; Oklopcic, A; Polanski, AS; Barman, T; Benneke, B; Christiansen, JL; Dragomir, D; Foreman-Mackey, D; Fortney, JJ; Greene, TP; Howard, AW; Knutson, HA; Lothringer, JD; Mikal-Evans, T; Morley, CV				Brande, Jonathan; Crossfield, Ian J. M.; Kreidberg, Laura; Oklopcic, Antonija; Polanski, Alex S.; Barman, Travis; Benneke, Bjorn; Christiansen, Jessie L.; Dragomir, Diana; Foreman-Mackey, Daniel; Fortney, Jonathan J.; Greene, Thomas P.; Howard, Andrew W.; Knutson, Heather A.; Lothringer, Joshua D.; Mikal-Evans, Thomas; Morley, Caroline, V			A Mirage or an Oasis? Water Vapor in the Atmosphere of the Warm Neptune TOI-674 b	ASTRONOMICAL JOURNAL																		Christiansen, Jessie/0000-0002-8035-4778; Oklopcic, Antonija/0000-0002-9584-6476													0004-6256	1538-3881				NOV 1	2022	164	5
J	Fang, Y; Wang, XL; Cheng, YF; Wang, ZJ				Fang, Yu; Wang, Xulian; Cheng, Yufei; Wang, Zhongjing			Oasis Change Characteristics and Influencing Factors in the Shiyang River Basin, China	SUSTAINABILITY																																2071-1050				NOV	2022	14	21
J	Senyuk, M; Safaraliev, M; Gulakhmadov, A; Ahyoev, J				Senyuk, Mihail; Safaraliev, Murodbek; Gulakhmadov, Aminjon; Ahyoev, Javod			Application of the Conditional Optimization Method for the Synthesis of the Law of Emergency Control of a Synchronous Generator Steam Turbine Operating in a Complex-Closed Configuration Power System	MATHEMATICS																	Senyuk, Mihail/GSE-1713-2022; Safaraliev, Murodbek/AAG-6805-2019	Senyuk, Mihail/0000-0002-5589-7922; Safaraliev, Murodbek/0000-0003-3433-9742														2227-7390				NOV	2022	10	21
J	Ullah, A; Tariq, A; Zeng, FJ; Sardans, J; Graciano, C; Ullah, S; Chai, XT; Zhang, ZH; Keyimu, M; Asghar, MA; Javed, HH; Penuelas, J				Ullah, Abd; Tariq, Akash; Zeng, Fanjiang; Sardans, Jordi; Graciano, Corina; Ullah, Sami; Chai, Xutian; Zhang, Zhihao; Keyimu, Maierdang; Asghar, Muhammad Ahsan; Javed, Hafiz Hassan; Penuelas, Josep			Phosphorous Supplementation Alleviates Drought-Induced Physio-Biochemical Damages in Calligonum mongolicum	PLANTS-BASEL																	Javed, Hafiz Hassan/AHC-8968-2022	Javed, Hafiz Hassan/0000-0003-0776-8701; Zhang, Zhihao/0000-0002-3260-7195; Graciano, Corina/0000-0003-0803-4128; Keyimu, Maierdang/0000-0003-0826-7271; Tariq, Akash/0000-0002-5382-9336														2223-7747				NOV	2022	11	22
J	Yang, X; Wang, WQ; Chen, XX; Sardans, J; Wang, C; Vancov, T; Fang, YY; Wang, SJ; Yuan, XZ; Llusia, J; Tariq, A; Zeng, FJ; Alrefaei, AF; Penuelas, J				Yang, Xiang; Wang, Weiqi; Chen, Xiaoxuan; Sardans, Jordi; Wang, Chun; Vancov, Tony; Fang, Yunying; Wang, Shujun; Yuan, Xiangzhou; Llusia, Joan; Tariq, Akash; Zeng, Fanjiang; Alrefaei, Abdulwahed Fahad; Penuelas, Josep			Effects of N-enriched biochar on ecosystem greenhouse gas emissions, rice yield, and bacterial community diversity in subtropical rice paddy soils	EUROPEAN JOURNAL OF SOIL BIOLOGY																	Penuelas, Josep/D-9704-2011	Penuelas, Josep/0000-0002-7215-0150													1164-5563	1778-3615				NOV-DEC	2022	113
J	Contreras, MD; Gomez-Cruz, I; Feriani, A; Alwasel, S; Harrath, AH; Romero, I; Castro, E; Tlili, N				del Mar Contreras, Maria; Gomez-Cruz, Irene; Feriani, Anouar; Alwasel, Saleh; Harrath, Abdel Halim; Romero, Inmaculada; Castro, Eulogio; Tlili, Nizar			Hepatopreventive properties of hydroxytyrosol and mannitol-rich extracts obtained from exhausted olive pomace using green extraction methods	FOOD & FUNCTION																		CONTRERAS, MARIA DEL MAR/0000-0002-3407-0088													2042-6496	2042-650X				NOV 14	2022	13	22
J	Guerra, CA; Berdugo, M; Eldridge, DJ; Eisenhauer, N; Singh, BK; Cui, H; Abades, S; Alfaro, FD; Bamigboye, AR; Bastida, F; Blanco-Pastor, JL; de los Rios, A; Duran, J; Grebenc, T; Illan, JG; Liu, YR; Makhalanyane, TP; Mamet, S; Molina-Montenegro, MA; Moreno, JL; Mukherjee, A; Nahberger, TU; Penaloza-Bojaca, GF; Plaza, C; Pico, S; Verma, JP; Rey, A; Rodriguez, A; Tedersoo, L; Teixido, AL; Torres-Di…				Guerra, Carlos A.; Berdugo, Miguel; Eldridge, David J.; Eisenhauer, Nico; Singh, Brajesh K.; Cui, Haiying; Abades, Sebastian; Alfaro, Fernando D.; Bamigboye, Adebola R.; Bastida, Felipe; Blanco-Pastor, Jose L.; de los Rios, Asuncion; Duran, Jorge; Grebenc, Tine; Illan, Javier G.; Liu, Yu-Rong; Makhalanyane, Thulani P.; Mamet, Steven; Molina-Montenegro, Marco A.; Moreno, Jose L.; Mukherjee, Arpan;…			Global hotspots for soil nature conservation	NATURE																	Pereiras, Alexandra Rodríguez/C-2879-2015; Singh, Brajesh/R-6321-2019; de los Rios, Asuncion/L-3694-2014; Moreno, José Luis/G-3826-2011; TEIXIDO, ALBERTO L/A-9551-2015; Wang, Juntao/O-4423-2015; Blanco-Pastor, Jose Luis/R-2075-2018; PENALOZA BOJACA, GABRIEL FELIPE/C-5992-2017; Liu, Yu-Rong/J-9684-2013	Pereiras, Alexandra Rodríguez/0000-0001-5849-8778; Singh, Brajesh/0000-0003-4413-4185; de los Rios, Asuncion/0000-0002-0266-3516; Moreno, José Luis/0000-0002-6063-7156; TEIXIDO, ALBERTO L/0000-0001-8009-1237; Wang, Juntao/0000-0002-1822-2176; Blanco-Pastor, Jose Luis/0000-0002-7708-1342; Pico Jorda, Sergio/0000-0002-4016-4670; PENALOZA BOJACA, GABRIEL FELIPE/0000-0001-7085-9521; Alfaro Ayllon, Fe…													0028-0836	1476-4687				OCT 27	2022	610	7933
J	Gros-Balthazard, M; Battesti, V; Flowers, JM; Ferrand, S; Breil, M; Ivorra, S; Terral, JF; Purugganan, MD; Wing, R; Mohammed, N; Bourgeois, Y				Gros-Balthazard, Muriel; Battesti, Vincent; Flowers, Jonathan M.; Ferrand, Sylvie; Breil, Matthieu; Ivorra, Sarah; Terral, Jean-Frederic; Purugganan, Michael D.; Wing, Rod A.; Mohammed, Nahed; Bourgeois, Yann			What lies behind a fruit crop variety name? A case study of the barni date palm from al-'Ula oasis, Saudi Arabia	PLANTS PEOPLE PLANET																	; Battesti, Vincent/B-1020-2012; Bourgeois, Yann/D-9938-2012	Flowers, Jonathan/0000-0002-8752-205X; Gros-Balthazard, Muriel/0000-0002-2587-3946; Battesti, Vincent/0000-0002-5793-1098; Mohammed, Nahed/0000-0002-8857-3246; Bourgeois, Yann/0000-0002-1809-387X; TERRAL, Jean-Frederic/0000-0003-1921-2161; Wing, Rod/0000-0001-6633-6226														2572-2611				JAN	2023	5	1
J	Xu, GQ; Kandlikar, GS; Vaz, MC				Xu, Gui-Qing; Kandlikar, Gaurav S.; Vaz, Marcel C.			Evolutionary lability underlies drought adaptation of Australian shrubs along aridity gradients	FRONTIERS IN PLANT SCIENCE																		Carita Vaz, Marcel/0000-0002-6003-8583													1664-462X					OCT 7	2022	13
J	Broekgaarden, FS; Berger, E; Stevenson, S; Justham, S; Mandel, I; Chruslinska, M; van Son, LAC; Wagg, T; Vigna-Gomez, A; de Mink, SE; Chattopadhyay, D; Neijssel, CJ				Broekgaarden, Floor S.; Berger, Edo; Stevenson, Simon; Justham, Stephen; Mandel, Ilya; Chruslinska, Martyna; van Son, Lieke A. C.; Wagg, Tom; Vigna-Gomez, Alejandro; de Mink, Selma E.; Chattopadhyay, Debatri; Neijssel, Coenraad J.			Impact of massive binary star and cosmic evolution on gravitational wave observations - II. Double compact object rates and properties	MONTHLY NOTICES OF THE ROYAL ASTRONOMICAL SOCIETY																		Mandel, Ilya/0000-0002-6134-8946; Stevenson, Simon/0000-0002-6100-537X; Broekgaarden, Floor/0000-0002-4421-4962													0035-8711	1365-2966				OCT 3	2022	516	4
J	Yu, X; Lei, JQ; Gao, X				Yu Xiang; Lei Jiaqiang; Gao Xin			An over review of desertification in Xinjiang, Northwest China	JOURNAL OF ARID LAND																															1674-6767	2194-7783				NOV	2022	14	11
J	Amundsen, C; Toozs-Hobson, P; Benson, K; Digesu, A; Lane, F; Ferrante, K; Pezzella, A				Amundsen, C.; Toozs-Hobson, P.; Benson, K.; Digesu, A.; Lane, F.; Ferrante, K.; Pezzella, A.			OASIS Pivotal Trial to Evaluate the Safety and Efficacy of the RENOVA iStim System (TM) for the Treatment of Women with OAB	INTERNATIONAL UROGYNECOLOGY JOURNAL																															0937-3462	1433-3023				OCT	2022	33	SUPPL 2
J	Hammami, SBM; Chaari, S; Baazaoui, N; Drira, R; Drira, N; Aounallah, K; Maazoun, A; Antar, Z; Novo, JVJ; Bettaieb, T; Rapoport, HF; Sghaier-Hammami, B				Hammami, Sofiene B. M.; Chaari, Sami; Baazaoui, Narjes; Drira, Riadh; Drira, Noureddine; Aounallah, Karim; Maazoun, Asma; Antar, Zied; Novo, Jesus V. Jorrin; Bettaieb, Taoufik; Rapoport, Hava F.; Sghaier-Hammami, Besma			The Regulation of Ion Homeostasis, Growth, and Biomass Allocation in Date Palm Ex Vitro Plants Depends on the Level of Water Salinity	SUSTAINABILITY																	Sghaier-Hammami, Besma/ACW-9235-2022; Antar, Zied/HKW-0849-2023; Jorrin Novo, Jesus V/L-1656-2014	Antar, Zied/0000-0001-9424-0993; Jorrin Novo, Jesus V/0000-0002-8778-3604														2071-1050				OCT	2022	14	19
J	Horner, W; Russell, C; Fairchild, P; Swenson, C; Schmidt, P				Horner, W.; Russell, C.; Fairchild, P.; Swenson, C.; Schmidt, P.			From OASIS to the OR: Timing of Presentation to a Postpartum Pelvic Floor Specialty Clinic in Women Undergoing Secondary Sphincteroplasty	INTERNATIONAL UROGYNECOLOGY JOURNAL																															0937-3462	1433-3023				OCT	2022	33	SUPPL 2
J	Jurado, CA; Parachuru, V; Tinoco, JV; Guzman-Perez, G; Tsujimoto, A; Javvadi, R; Afrashtehfar, KI				Jurado, Carlos A.; Parachuru, Venkata; Tinoco, Jose Villalobos; Guzman-Perez, Gerardo; Tsujimoto, Akimasa; Javvadi, Ramya; Afrashtehfar, Kelvin, I			Diagnostic Mock-Up as a Surgical Reduction Guide for Crown Lengthening: Technique Description and Case Report	MEDICINA-LITHUANIA																	Afrashtehfar, Kelvin Ian/G-1938-2017	Afrashtehfar, Kelvin Ian/0000-0002-6053-8967; Jurado, Carlos/0000-0001-7437-4855													1010-660X	1648-9144				OCT	2022	58	10
J	Li, BF; Gui, DW; Xue, DP; Liu, YF; Ahmed, Z; Lei, JQ				Li, Bofei; Gui, Dongwei; Xue, Dongping; Liu, Yunfei; Ahmed, Zeeshan; Lei, Jiaqiang			Analysis of the Expansion Characteristics and Carrying Capacity of Oasis Farmland in Northwestern China in Recent 40 Years	AGRONOMY-BASEL																																2073-4395				OCT	2022	12	10
J	Muhetaer, N; Nurmemet, I; Abulaiti, A; Xiao, ST; Zhao, J				Muhetaer, Nuerbiye; Nurmemet, Ilyas; Abulaiti, Adilai; Xiao, Sentian; Zhao, Jing			An Efficient Approach for Inverting the Soil Salinity in Keriya Oasis, Northwestern China, Based on the Optical-Radar Feature-Space Model	SENSORS																		xiao, sen tian/0000-0001-9272-6762														1424-8220				OCT	2022	22	19
J	Murillo, A; Durst, R; Giugale, L				Murillo, A.; Durst, R.; Giugale, L.			Comparison of Wound Complications between Women with OASIS repairs with Braided Absorbable vs Chromic Catgut Suture	INTERNATIONAL UROGYNECOLOGY JOURNAL																															0937-3462	1433-3023				OCT	2022	33	SUPPL 2
J	Praveenkumar, S; Gulakhmadov, A; Kumar, A; Safaraliev, M; Chen, X				Praveenkumar, Seepana; Gulakhmadov, Aminjon; Kumar, Abhinav; Safaraliev, Murodbek; Chen, Xi			Comparative Analysis for a Solar Tracking Mechanism of Solar PV in Five Different Climatic Locations in South Indian States: A Techno-Economic Feasibility	SUSTAINABILITY																	Kumar, Abhinav/AAC-4534-2021; Safaraliev, Murodbek/AAG-6805-2019	Kumar, Abhinav/0000-0003-1777-7994; Safaraliev, Murodbek/0000-0003-3433-9742; Praveenkumar, Seepana/0000-0002-5667-9476; Gulakhmadov, Aminjon/0000-0002-2366-2491														2071-1050				OCT	2022	14	19
J	Thephavanh, M; Philp, JNM; Nuberg, I; Denton, M; Alexander, K				Thephavanh, Manithaythip; Philp, Joshua Neil Monty; Nuberg, Ian; Denton, Matthew; Alexander, Kim			Narrative Insights Reveal the Motivations of Young Agricultural Entrepreneurs in Laos	SUSTAINABILITY																		Philp, Joshua/0000-0002-5839-540X; Denton, Matthew/0000-0002-2804-0384														2071-1050				OCT	2022	14	20
J	Ualiyeva, D; Ermakov, OA; Litvinchuk, SN; Guo, XG; Ivanov, AY; Xu, R; Li, J; Xu, F; Arifulova, II; Kaptyonkina, AG; Khromov, VA; Krainyuk, VN; Sarzhanov, F; Dujsebayeva, TN				Ualiyeva, Daniya; Ermakov, Oleg A.; Litvinchuk, Spartak N.; Guo, Xianguang; Ivanov, Alexander Yu; Xu, Rui; Li, Jun; Xu, Feng; Arifulova, Irina I.; Kaptyonkina, Alyona G.; Khromov, Victor A.; Krainyuk, Vladimir N.; Sarzhanov, Fakhriddin; Dujsebayeva, Tatjana N.			Diversity, Phylogenetic Relationships and Distribution of Marsh Frogs (the Pelophylax ridibundus complex) from Kazakhstan and Northwest China	DIVERSITY-BASEL																	Litvinchuk, Spartak N/F-1929-2017; Kaptyonkina, Alyona/GXN-0177-2022; Dujsebayeva, Tatjana N./T-7776-2019; Xu, Feng/A-8626-2011; SARZHANOV, Fakhriddin/K-5578-2019; Arifulova, Irina/Q-1484-2017; Guo, Xianguang/C-3282-2013	Kaptyonkina, Alyona/0000-0003-1492-8056; Dujsebayeva, Tatjana N./0000-0002-0127-3604; Xu, Feng/0000-0001-8925-977X; SARZHANOV, Fakhriddin/0000-0001-9433-2126; Arifulova, Irina/0000-0002-5303-5640; Krainyuk, Vladimir/0000-0002-9330-9925; Li, Jun/0000-0002-5279-7248; Guo, Xianguang/0000-0001-7721-7388														1424-2818				OCT	2022	14	10
J	Wang, JH; Zhang, F; Luo, GM; Guo, YC; Zheng, JH; Wu, SX; Wang, DW; Liu, SH; Shi, QD				Wang, Jinhua; Zhang, Feng; Luo, Guangming; Guo, Yuchuan; Zheng, Jianghua; Wu, Shixin; Wang, Dawei; Liu, Suhong; Shi, Qingdong			Factors Influencing Seasonal Changes in Inundation of the Daliyaboyi Oasis, Lower Keriya River Valley, Central Tarim Basin, China	REMOTE SENSING																		Feng, Zhang/0000-0003-3365-6404														2072-4292				OCT	2022	14	19
J	Wang, SJ; Wang, LW; Zhang, MJ; Shi, YD; Hughes, CE; Crawford, J; Zhou, JL; Qu, DY				Wang, Shengjie; Wang, Liwei; Zhang, Mingjun; Shi, Yudong; Hughes, Catherine E.; Crawford, Jagoda; Zhou, Jinlong; Qu, Deye			Quantifying moisture recycling of a leeward oasis in arid central Asia using a Bayesian isotopic mixing model	JOURNAL OF HYDROLOGY																	Hughes, Catherine/A-1993-2011	Hughes, Catherine/0000-0003-1474-402X; Wang, Shengjie/0000-0001-8095-2674													0022-1694	1879-2707				OCT	2022	613		B
J	Wang, ZL; Zhao, WL; Xi, LQ				Wang, Zhenlei; Zhao, Weiliang; Xi, Linqiao			Alfalfa Cover Crops Influence the Soil Fungal Community and Function in Apple Orchards in Arid Desert Oases in Northwest China	SUSTAINABILITY																																2071-1050				OCT	2022	14	19
J	Yang, XY; Eziz, M; Hayrat, A; Ma, XF; Yan, W; Qian, KX; Li, JX; Liu, Y; Wang, YF				Yang, Xiuyun; Eziz, Mamattursun; Hayrat, Adila; Ma, Xiaofei; Yan, Wei; Qian, Kaixuan; Li, Jiaxin; Liu, Yuan; Wang, Yifan			Heavy Metal Pollution and Risk Assessment of Surface Dust in the Arid NW China	INTERNATIONAL JOURNAL OF ENVIRONMENTAL RESEARCH AND PUBLIC HEALTH																	Ma, Xiaofei/ABB-5302-2022; Yan, Wei/GPW-7906-2022	Ma, Xiaofei/0000-0001-9456-0065; Yan, Wei/0000-0003-1391-1252; , Mamattursun/0000-0001-8592-2386; YANG, Xiuyun/0000-0003-2463-6225; liu, yuan/0000-0002-1477-7393; li, jia xin/0000-0001-6202-6722; Qian, Kaixuan/0000-0003-0484-2435														1660-4601				OCT	2022	19	20
J	Cronin, MF; Swart, S; Marandino, CA; Anderson, C; Browne, P; Chen, S; Joubert, WR; Schuster, U; Venkatesan, R; Addey, CI; Alves, O; Ardhuin, F; Battle, S; Bourassa, MA; Chen, Z; Chory, M; Clayson, C; de Souza, RB; du Plessis, M; Edmondson, M; Edson, JB; Gille, ST; Hermes, J; Hormann, V; Josey, SA; Kurz, M; Lee, T; Maicu, F; Moustahfid, EH; Nicholson, SA; Nyadjro, ES; Palter, J; Patterson, RG; Pen…				Cronin, M. F.; Swart, S.; Marandino, C. A.; Anderson, C.; Browne, P.; Chen, S.; Joubert, W. R.; Schuster, U.; Venkatesan, R.; Addey, C., I; Alves, O.; Ardhuin, F.; Battle, S.; Bourassa, M. A.; Chen, Z.; Chory, M.; Clayson, C.; de Souza, R. B.; du Plessis, M.; Edmondson, M.; Edson, J. B.; Gille, S. T.; Hermes, J.; Hormann, V; Josey, S. A.; Kurz, M.; Lee, T.; Maicu, F.; Moustahfid, E. H.; Nicholson…			Developing an Observing Air-Sea Interactions Strategy (OASIS) for the global ocean	ICES JOURNAL OF MARINE SCIENCE																	Pezzi, Luciano Ponzi/N-7271-2017; Addey, Charles/AFK-1383-2022; Souza, Ronald/R-5867-2016; Sutton, Adrienne/C-7725-2015; Swart, Sebastiaan/U-5498-2017; Pinardi, Nadia/M-2364-2015	Pezzi, Luciano Ponzi/0000-0001-6016-4320; Souza, Ronald/0000-0003-3346-3370; Browne, Philip/0000-0001-9440-9517; MAICU, FRANCESCO/0000-0002-7448-0022; Sutton, Adrienne/0000-0002-7414-7035; Swart, Sebastiaan/0000-0002-2251-8826; Pinardi, Nadia/0000-0003-4765-0775; Addey, Charles/0000-0002-7846-8813; Battle, Sarah/0000-0001-6568-6275; Chory, Margaret/0000-0002-2067-2459													1054-3139	1095-9289
J	Caballero-Gomez, J; Garcia-Bocanegra, I; Cano-Terriza, D; Beato-Benitez, A; Ulrich, RG; Martinez, J; Guerra, R; Martinez-Valverde, R; Martinez-Nevado, E; Quevedo-Munoz, MA; Sierra-Arqueros, C; Planas, J; de Castro-Garcia, N; Rivero, A; Rivero-Juarez, A				Caballero-Gomez, Javier; Garcia-Bocanegra, Ignacio; Cano-Terriza, David; Beato-Benitez, Adrian; Ulrich, Rainer G.; Martinez, Javier; Guerra, Rafael; Martinez-Valverde, Rosa; Martinez-Nevado, Eva; Angel Quevedo-Munoz, Miguel; Sierra-Arqueros, Cecilia; Planas, Javier; de Castro-Garcia, Noelia; Rivero, Antonio; Rivero-Juarez, Antonio			Monitoring of hepatitis E virus in zoo animals from Spain, 2007-2021	TRANSBOUNDARY AND EMERGING DISEASES																		Caballero-Gomez, Javier/0000-0002-6241-3439; Cano-Terriza, David/0000-0001-5657-2567; Ulrich, Rainer G./0000-0002-5620-1528; Beato-Benitez, Adrian/0000-0001-9608-0022													1865-1674	1865-1682
J	Ullah, A; Tariq, A; Sardans, J; Penuelas, J; Zeng, FJ; Graciano, C; Asghar, MA; Raza, A; Xiong, YC; Chai, XT; Zhang, ZH				Ullah, Abd; Tariq, Akash; Sardans, Jordi; Penuelas, Josep; Zeng, Fanjiang; Graciano, Corina; Asghar, Muhammad Ahsan; Raza, Ali; Xiong, You-Cai; Chai, Xutian; Zhang, Zhihao			Alhagi sparsifolia acclimatizes to saline stress by regulating its osmotic, antioxidant, and nitrogen assimilation potential	BMC PLANT BIOLOGY																	Xiong, You-Cai/HDL-8596-2022; Penuelas, Josep/D-9704-2011	Xiong, You-Cai/0000-0002-4394-8331; Penuelas, Josep/0000-0002-7215-0150													1471-2229					SEP 21	2022	22	1
J	Schween, JH; del Rio, C; Garcia, JL; Osses, P; Westbrook, S; Lohnert, U				Schween, Jan H.; del Rio, Camilo; Garcia, Juan-Luis; Osses, Pablo; Westbrook, Sarah; Lohnert, Ulrich			Life cycle of stratocumulus clouds over 1 year at the coast of the Atacama Desert	ATMOSPHERIC CHEMISTRY AND PHYSICS																	Löhnert, Ulrich/C-3303-2013; UzK, IGMK/HGU-4003-2022; Garcia, Juan-Luis/U-6381-2017	Löhnert, Ulrich/0000-0002-9023-0269; Schween, Jan Herbert/0000-0001-6686-1207; Garcia, Juan-Luis/0000-0002-9028-7572													1680-7316	1680-7324				SEP 20	2022	22	18
J	Zhuang, QW; Shao, ZF; Li, DR; Huang, X; Altan, ORH; Wu, SX; Li, YZ				Zhuang, Qingwei; Shao, Zhenfeng; Li, Deren; Huang, Xiao; Altan, Orhan; Wu, Shixin; Li, Yuzhen			Isolating the direct and indirect impacts of urbanization on vegetation carbon sequestration capacity in a large oasis city: evidence from Urumqi, China	GEO-SPATIAL INFORMATION SCIENCE																	Huang, Xiao/AAS-4608-2020	Huang, Xiao/0000-0002-4323-382X													1009-5020	1993-5153
J	Rajivgandhi, G; Ramachandran, G; Chackaravarthi, G; Chelliah, CK; Maruthupandy, M; Quero, F; AL-mekhlafi, FA; Wadaan, MA; Li, WJ				Rajivgandhi, Govindan; Ramachandran, Govindan; Chackaravarthi, Gnansekaran; Chelliah, Chenthis Kanisha; Maruthupandy, Muthuchamy; Quero, Franck; AL-mekhlafi, Fahd A.; Wadaan, Muhammad A.; Li, Wen-Jun			Preparation of antibacterial Zn and Ni substituted cobalt ferrite nanoparticles for efficient biofilm eradication	ANALYTICAL BIOCHEMISTRY																	Al-Mekhlafi, A, Fahd/AAX-4416-2021; Govindan, Rajivgandhi/ABG-5120-2021	Al-Mekhlafi, A, Fahd/0000-0002-8190-7901; Govindan, Rajivgandhi/0000-0003-4907-8100													0003-2697	1096-0309				SEP 15	2022	653
J	Torres, CM; Knudson, KJ; Pestle, WJ				Torres, Christina M.; Knudson, Kelly J.; Pestle, William J.			A multiplicity of identities: The intersections of cranial vault modification, paleodiet, and sex in San Pedro de Atacama, Chile	AMERICAN JOURNAL OF BIOLOGICAL ANTHROPOLOGY																		Torres, Christina M./0000-0001-6759-2977													2692-7691					DEC	2022	179	4
J	Falcon-Brindis, A; Leon-Cortes, JL				Falcon-Brindis, Armando; Leon-Cortes, Jorge L.			The oases of Baja California Peninsula: overlooked hotspots for wild bees	JOURNAL OF INSECT CONSERVATION																	Falcón-Brindis, Armando/AGR-4931-2022	Falcón-Brindis, Armando/0000-0003-2496-2178													1366-638X	1572-9753
J	Jain, A; Lew, C; Thungathruthi, K; Ng, SC; Hiscock, R; Mirbagheri, N				Jain, Anshini; Lew, Chen; Thungathruthi, Kaushik; Ng, Suat Chin; Hiscock, Richard; Mirbagheri, Naseem			Incidence and risk factors for secondary failure after acute obstetric sphincter injury repair - an audit of 239 women	COLORECTAL DISEASE																															1462-8910	1463-1318
J	Stairs, J; Rolnik, DL; Pascali, D; Clancy, A				Stairs, Jocelyn; Rolnik, Daniel L.; Pascali, Dante; Clancy, Aisling			Association between obstetrical anal sphincter injury and postpartum urinary retention: a contemporary nationwide cohort study	INTERNATIONAL UROGYNECOLOGY JOURNAL																	Rolnik, Daniel/R-3706-2018	Rolnik, Daniel/0000-0002-2263-3592; Stairs, Jocelyn/0000-0002-6748-2310													0937-3462	1433-3023				DEC	2022	33	12
J	Sirsi, S; Quach, H; Kang, HYK; Morken, P; Palisoc, A; Takashima, Y; D' Aubigny, C; Chandra, A; Esparza, M; Karrfalt, K; Derby, KZ; Choi, H; Kim, D; Walker, C				Sirsi, Siddhartha; Quach, Henry; Kang, Hyukmo; Morken, Pete; Palisoc, Arthur; Takashima, Yuzuru; D' Aubigny, Christian; Chandra, Aman; Esparza, Marcos; Karrfalt, Karlene; Derby, Kevin Z.; Choi, Heejoo; Kim, Daewook; Walker, Christopher			Modeling and characterization of OASIS inflatable primary antenna by dual modality metrology	OPTICS EXPRESS																		Takashima, Yuzuru/0000-0003-3011-9320; Kang, Hyukmo/0000-0002-2224-1353													1094-4087					SEP 12	2022	30	19
J	Liu, XY; Wang, WQ; Penuelas, J; Sardans, J; Chen, XX; Fang, YY; Alrefaei, AF; Zeng, FJ; Tariq, A				Liu, Xuyang; Wang, Weiqi; Penuelas, Josep; Sardans, Jordi; Chen, Xiaoxuan; Fang, Yunying; Alrefaei, Abdulwahed Fahad; Zeng, Fanjiang; Tariq, Akash			Effects of nitrogen-enriched biochar on subtropical paddy soil organic carbon pool dynamics	SCIENCE OF THE TOTAL ENVIRONMENT																	Penuelas, Josep/D-9704-2011	Penuelas, Josep/0000-0002-7215-0150													0048-9697	1879-1026				DEC 10	2022	851		2
J	Galustian, C; Dalgleish, A; Bodman-Smith, M; Kusmartsev, S; Dasgupta, P				Galustian, Christine; Dalgleish, Angus; Bodman-Smith, Mark; Kusmartsev, Sergei; Dasgupta, Prokar			Editorial: Immunotherapy for Prostate Cancer - turning the immunological desert into an oasis of hope	FRONTIERS IN ONCOLOGY																		Kusmartsev, Sergei/0000-0002-0837-8310													2234-943X					SEP 8	2022	12
J	McRostie, V; Babot, P; Calas, E; Gayo, E; Gallardo, F; Godoy-Aguirre, C; Labarca, R; Latorre, C; Nunez, L; Ojeda, K; Santoro, CM; Valenzuela, D				McRostie, Virginia; Babot, Pilar; Calas, Elisa; Gayo, Eugenia; Gallardo, Francisco; Godoy-Aguirre, Carolina; Labarca, Rafael; Latorre, Claudio; Nunez, Lautaro; Ojeda, Karla; Santoro, Calogero M.; Valenzuela, Daniela			Silvopastoralism and the shaping of forest patches in the Atacama Desert during the Formative Period (ca. 3000-1500 years BP)	HOLOCENE																		Godoy-Aguirre, Carolina/0000-0001-8471-0808; Babot, Pilar/0000-0001-8382-7801; MCROSTIE, VIRGINIA/0000-0002-3146-3345													0959-6836	1477-0911				DEC	2022	32	12
J	Cano-Jimenez, E; Ortiz, ADR; Villar, A; Rodriguez-Nieto, MJ; Ramon, A; Armengol, S				Cano-Jimenez, Esteban; Romero Ortiz, Ana Dolores; Villar, Ana; Jesus Rodriguez-Nieto, Maria; Ramon, Alba; Armengol, Silvia			Clinical management and acute exacerbations in patients with idiopathic pulmonary fibrosis in Spain: results from the OASIS study	RESPIRATORY RESEARCH																																1465-993X				SEP 7	2022	23	1
J	Rajivgandhi, G; Ramachandran, G; Chackaravarthi, G; Maruthupandy, M; Quero, F; Chelliah, CK; Manoharan, N; Alharbi, NS; Kadaikunnan, S; Khaled, JM; Li, WJ				Rajivgandhi, Govindan; Ramachandran, Govindan; Chackaravarthi, Gnanasekaran; Maruthupandy, Muthuchamy; Quero, Franck; Chelliah, Chenthis Kanisha; Manoharan, Natesan; Alharbi, Naiyf S.; Kadaikunnan, Shine; Khaled, Jamal M.; Li, Wen-Jun			Metal tolerance and biosorption of Pb ions by Bacillus cereus RMN 1 (MK521259) isolated from metal contaminated sites	CHEMOSPHERE																	Kadaikunnan, Shine/L-2836-2013	Kadaikunnan, Shine/0000-0001-7018-5379; Khaled, Jamal/0000-0003-2442-0790													0045-6535	1879-1298				DEC	2022	308		1
J	Liu, XY; Wang, YJ; Xin, LJ				Liu, Xiaoyu; Wang, Yujing; Xin, Liangjie			China's oases have expanded by nearly 40% over the past 20 years	LAND DEGRADATION & DEVELOPMENT																		Wang, Yu-Jing/0000-0002-1182-0958													1085-3278	1099-145X				DEC	2022	33	18
J	Wang, WC; Pang, JY; Zhang, FH; Sun, LP; Yang, L; Fu, TD; Siddique, KHM				Wang, Weichao; Pang, Jiayin; Zhang, Fenghua; Sun, Lupeng; Yang, Lei; Fu, Tingdong; Siddique, Kadambot H. M.			Transcriptome Analysis Reveals Key Molecular Pathways in Response to Alkaline Salt Stress in Canola (Brassica napus L.) Roots	JOURNAL OF PLANT GROWTH REGULATION																	Siddique, Kadambot H.M./B-3462-2011; Wang, Weichao/AAE-5178-2022	Siddique, Kadambot H.M./0000-0001-6097-4235; Wang, Weichao/0000-0003-2761-6561; Pang, Jiayin/0000-0002-8127-645X													0721-7595	1435-8107
J	Feng, TJ; Wang, D; Wang, RS; Wang, YX; Xin, ZM; Luo, FM; Ma, Y; Li, X; Xiao, HJ; Caballero-Calvo, A; Rodrigo-Comino, J				Feng Tianjiao; Wang Dong; Wang Ruoshui; Wang Yixin; Xin Zhiming; Luo Fengmin; Ma Yuan; Li Xing; Xiao Huijie; Caballero-Calvo, Andres; Rodrigo-Comino, Jesus			Spatial-temporal heterogeneity of environmental factors and ecosystem functions in farmland shelterbelt systems in desert oasis ecotones	AGRICULTURAL WATER MANAGEMENT																	Caballero-Calvo, Andrés/ABH-1176-2021	Caballero-Calvo, Andres/0000-0002-4382-0055													0378-3774	1873-2283				SEP 1	2022	271
J	Gou, QQ; Shen, CS; Wang, GH				Gou, Qianqian; Shen, Changsheng; Wang, Guohua			Changes in Soil Moisture, Temperature, and Salt in Rainfed Haloxylon ammodendron Forests of Different Ages across a Typical Desert-Oasis Ecotone	WATER																																2073-4441				SEP	2022	14	17
J	Harrison, J; Melov, S; Kirby, AC; Athayde, N; Boghossian, A; Cheung, W; Inglis, E; Maravar, K; Padmanabhan, S; Luig, M; Hook, M; Pasupathy, D				Harrison, Jackson; Melov, Sarah; Kirby, Adrienne C.; Athayde, Neil; Boghossian, Araz; Cheung, Wah; Inglis, Emma; Maravar, Kavita; Padmanabhan, Suja; Luig, Melissa; Hook, Monica; Pasupathy, Dharmintra			Pregnancy outcomes in women with gestational diabetes mellitus by models of care: a retrospective cohort study	BMJ OPEN																		Harrison, Jackson/0000-0002-4102-5453; Melov, Sarah J/0000-0002-7569-1016													2044-6055					SEP	2022	12	9
J	Mosaad, S; Eissa, M; Alezabawy, AK				Mosaad, Sayed; Eissa, Mustafa; Alezabawy, Ahmed K.			Geochemical modeling and geostatistical categorization of groundwater in Nubian Sandstone Aquifer, El Bahariya Oasis, Egypt	ENVIRONMENTAL EARTH SCIENCES																		Mosaad, Sayed/0000-0002-3265-4135													1866-6280	1866-6299				SEP	2022	81	17
J	Praveenkumar, S; Gulakhmadov, A; Agyekum, EB; Alwan, NT; Velkin, VI; Sharipov, P; Safaraliev, M; Chen, X				Praveenkumar, Seepana; Gulakhmadov, Aminjon; Agyekum, Ephraim Bonah; Alwan, Naseer T.; Velkin, Vladimir Ivanovich; Sharipov, Parviz; Safaraliev, Murodbek; Chen, Xi			Experimental Study on Performance Enhancement of a Photovoltaic Module Incorporated with CPU Heat Pipe-A 5E Analysis	SENSORS																	Alwan, Naseer T./AAI-8439-2021; Safaraliev, Murodbek/AAG-6805-2019	Alwan, Naseer T./0000-0003-3955-6420; Safaraliev, Murodbek/0000-0003-3433-9742; Agyekum, Ephraim Bonah/0000-0002-6947-4349; Praveenkumar, Seepana/0000-0002-5667-9476; Gulakhmadov, Aminjon/0000-0002-2366-2491; Velkin, Vladimir/0000-0002-4435-4009														1424-8220				SEP	2022	22	17
J	Shao, DN; Liang, Q; Wang, XF; Zhu, QH; Liu, F; Li, YN; Zhang, XY; Yang, YL; Sun, J; Xue, F				Shao, Dongnan; Liang, Qian; Wang, Xuefeng; Zhu, Qian-Hao; Liu, Feng; Li, Yanjun; Zhang, Xinyu; Yang, Yonglin; Sun, Jie; Xue, Fei			Comparative Metabolome and Transcriptome Analysis of Anthocyanin Biosynthesis in White and Pink Petals of Cotton (Gossypium hirsutum L.)	INTERNATIONAL JOURNAL OF MOLECULAR SCIENCES																	Zhu, Qian-Hao/A-1298-2010	Zhu, Qian-Hao/0000-0002-6505-7417; fei, Xue/0000-0001-6311-1961; Sun, Jie/0000-0002-8068-8102; Liu, Feng/0000-0002-4693-8489; Shao, Dongnan/0000-0002-4860-3244														1422-0067				SEP	2022	23	17
J	Sheikh-Assadi, M; Naderi, R; Salami, SA; Kafi, M; Fatahi, R; Shariati, V; Martinelli, F; Cicatelli, A; Triassi, M; Guarino, F; Improta, G; Claros, MG				Sheikh-Assadi, Morteza; Naderi, Roohangiz; Salami, Seyed Alireza; Kafi, Mohsen; Fatahi, Reza; Shariati, Vahid; Martinelli, Federico; Cicatelli, Angela; Triassi, Maria; Guarino, Francesco; Improta, Giovanni; Claros, Manuel Gonzalo			Normalized Workflow to Optimize Hybrid De Novo Transcriptome Assembly for Non-Model Species: A Case Study in Lilium ledebourii (Baker) Boiss	PLANTS-BASEL																	Sheikh-Assadi, Morteza/AAY-9750-2021	Sheikh-Assadi, Morteza/0000-0003-1619-1166; Guarino, Francesco/0000-0001-8536-4257; Cicatelli, Angela/0000-0001-6996-3495														2223-7747				SEP	2022	11	18
J	Zhang, L; Liu, YF; Yin, CJ; Xue, DP; Gui, DW; Qi, ZM				Zhang, Lei; Liu, Yunfei; Yin, Changjun; Xue, Dongping; Gui, Dongwei; Qi, Zhiming			Effects of Farmland Landscape Fragmentation on Agricultural Irrigation in Hotan Oasis	AGRICULTURE-BASEL																																2077-0472				SEP	2022	12	9
J	Ma, DK; He, ZB; Wang, LS; Zhao, WZ; Chen, LF; Lin, PF; Zhao, P; Wang, W; Gao, Y; Li, J				Ma, Dengke; He, Zhibin; Wang, Lisha; Zhao, Wenzhi; Chen, Longfei; Lin, Pengfei; Zhao, Peng; Wang, Wen; Gao, Yuan; Li, Jing			Soil water and salt migration in oasis farmland during crop growing season	JOURNAL OF SOILS AND SEDIMENTS																															1439-0108	1614-7480				JAN	2023	23	1
J	Timulak, L; Richards, D; Bhandal-Griffin, L; Healy, P; Azevedo, J; Connon, G; Martin, E; Kearney, A; O'Kelly, C; Enrique, A; Eilert, N; O'Brien, S; Harty, S; Gonzalez-Robles, A; Eustis, EH; Barlow, DH; Farchione, TJ				Timulak, Ladislav; Richards, Derek; Bhandal-Griffin, Louise; Healy, Patrick; Azevedo, Juliana; Connon, Graham; Martin, Elaine; Kearney, Aoife; O'Kelly, Conor; Enrique, Angel; Eilert, Nora; O'Brien, Sorcha; Harty, Siobhan; Gonzalez-Robles, Alberto; Eustis, Elizabeth H.; Barlow, David H.; Farchione, Todd J.			Effectiveness of the internet-based Unified Protocol transdiagnostic intervention for the treatment of depression, anxiety and related disorders in a primary care setting: a randomized controlled trial	TRIALS																	González-Robles, Alberto/AAE-5928-2020; Timulak, Ladislav/P-6881-2017	González-Robles, Alberto/0000-0002-3749-3756; Timulak, Ladislav/0000-0003-2785-0753; Richards, Derek/0000-0003-0871-4078														1745-6215				AUG 31	2022	23	1
J	Solmi, M; Croatto, G; Piva, G; Rosson, S; Fusar-Poli, P; Rubio, JM; Carvalho, AF; Vieta, E; Arango, C; DeTore, NR; Eberlin, ES; Mueser, KT; Correll, CU				Solmi, Marco; Croatto, Giovanni; Piva, Giada; Rosson, Stella; Fusar-Poli, Paolo; Rubio, Jose M.; Carvalho, Andre F.; Vieta, Eduard; Arango, Celso; DeTore, Nicole R.; Eberlin, Elizabeth S.; Mueser, Kim T.; Correll, Christoph U.			Efficacy and acceptability of psychosocial interventions in schizophrenia: systematic overview and quality appraisal of the meta-analytic evidence	MOLECULAR PSYCHIATRY																	Arango, Celso/AAZ-8314-2021; Correll, Christoph/D-3530-2011; Fusar-Poli, Paolo/D-8605-2011	Arango, Celso/0000-0003-3382-4754; Correll, Christoph/0000-0002-7254-5646; Fusar-Poli, Paolo/0000-0003-3582-6788; Rubio, Jose M/0000-0002-0056-4135; Carvalho, Andre/0000-0002-2500-5671; solmi, marco/0000-0003-4877-7233; Rosson, Stella/0000-0002-8554-3519													1359-4184	1476-5578
J	Kouzbour, S; Gourich, B; Gros, F; Vial, C; Stiriba, Y				Kouzbour, Sanaa; Gourich, Bouchaib; Gros, Fabrice; Vial, Christophe; Stiriba, Youssef			A novel approach for removing cadmium from synthetic wet phosphoric acid using sulfide precipitation process operating in batch and continuous modes	MINERALS ENGINEERING																															0892-6875					SEP	2022	187
J	Sang, ZQ; Zhang, ZQ; Yang, YX; Li, ZW; Liu, XG; Xu, YB; Li, WH				Sang, Zhi-qin; Zhang, Zhan-qin; Yang, Yu-xin; Li, Zhi-wei; Liu, Xiao-gang; Xu, Yun-bi; Li, Wei-hua			Heterosis and heterotic patterns of maize germplasm revealed by a multiple-hybrid population under well-watered and drought-stressed conditions	JOURNAL OF INTEGRATIVE AGRICULTURE																	yang, yx/GZM-0464-2022														2095-3119					SEP	2022	21	9
J	Yang, F; Han, YC; Zhu, QH; Zhang, XY; Xue, F; Li, YJ; Luo, HH; Qin, JH; Sun, J; Liu, F				Yang, Fan; Han, Yongchao; Zhu, Qian-Hao; Zhang, Xinyu; Xue, Fei; Li, Yanjun; Luo, Honghai; Qin, Jianghong; Sun, Jie; Liu, Feng			Impact of water deficiency on leaf cuticle lipids and gene expression networks in cotton (Gossypium hirsutum L.)	BMC PLANT BIOLOGY																	luo, honghai/ABC-8620-2022; Zhu, Qian-Hao/A-1298-2010	Zhu, Qian-Hao/0000-0002-6505-7417; fei, Xue/0000-0001-6311-1961													1471-2229					AUG 17	2022	22	1
J	Calvo, FE; Silvente, ST; Trentacoste, ER				Emmanuel Calvo, Franco; Teresa Silvente, Sonia; Rafael Trentacoste, Eduardo			A mini review of the impacts of deficit irrigation strategies for walnut (Juglans regia L.) production in semiarid conditions	IRRIGATION SCIENCE																		Calvo, Franco/0000-0002-4335-658X													0342-7188	1432-1319
J	Chen, DS; Zhang, F; Jim, CY; Bahtebay, J				Chen, Daosheng; Zhang, Fei; Jim, Chi Yung; Bahtebay, Jupar			Spatio-temporal evolution of landscape patterns in an oasis city	ENVIRONMENTAL SCIENCE AND POLLUTION RESEARCH																	Chen, Daosheng/HJZ-0302-2023	Chen, Daosheng/0000-0002-0448-2356													0944-1344	1614-7499
J	Song, Q; Hu, BF; Peng, J; Bourennane, H; Biswas, A; Opitz, T; Shi, Z				Song, Qi; Hu, Bifeng; Peng, Jie; Bourennane, Hocine; Biswas, Asim; Opitz, Thomas; Shi, Zhou			Spatio-temporal variation and dynamic scenario simulation of ecological risk in a typical artificial oasis in northwestern China	JOURNAL OF CLEANER PRODUCTION																	shi, Zhou/M-7845-2019; Biswas, Asim/D-1859-2015	shi, Zhou/0000-0003-3914-5402; Biswas, Asim/0000-0003-0801-3546													0959-6526	1879-1786				OCT 1	2022	369
J	Tucker, J; Hassam, T; Juszczyk, K; Briley, A; Parange, A; Murphy, EMA				Tucker, Julie; Hassam, Tayla; Juszczyk, Karolina; Briley, Annette; Parange, Anupam; Murphy, Elizabeth Mary Anne			Post-repair laxative management in obstetric anal sphincter injury guidelines: A narrative review	AUSTRALIAN & NEW ZEALAND JOURNAL OF OBSTETRICS & GYNAECOLOGY																		Tucker, Julie M/0000-0003-0891-052X; Briley, Annette/0000-0002-4266-920X													0004-8666	1479-828X
J	Blauvelt, A; Kimball, AB; Augustin, M; Okubo, Y; Witte, MM; Capriles, CR; Sontag, A; Arora, V; Osuntokun, O; Strober, B				Blauvelt, Andrew; Kimball, Alexa B.; Augustin, Matthias; Okubo, Yukari; Witte, Michael M.; Capriles, Claudia Rodriguez; Sontag, Angelina; Arora, Vipin; Osuntokun, Olawale; Strober, Bruce			Efficacy and safety of mirikizumab in psoriasis: results from a 52-week, double-blind, placebo-controlled, randomized withdrawal, phase III trial (OASIS-1)	BRITISH JOURNAL OF DERMATOLOGY																		Blauvelt, Andrew/0000-0002-2633-985X; Strober, Bruce/0000-0002-8394-2057													0007-0963	1365-2133
J	Bourgeat, P; Dore, V; Burnham, SC; Benzinger, T; Tosun, D; Li, SP; Goyal, M; LaMontagne, P; Jin, L; Rowe, CC; Weiner, MW; Morris, JC; Masters, CL; Fripp, J; Villemagne, VL				Bourgeat, Pierrick; Dore, Vincent; Burnham, Samantha C.; Benzinger, Tammie; Tosun, Duygu; Li, Shenpeng; Goyal, Manu; LaMontagne, Pamela; Jin, Liang; Rowe, Christopher C.; Weiner, Michael W.; Morris, John C.; Masters, Colin L.; Fripp, Jurgen; Villemagne, Victor L.		Alzheimers Dis Neuroimaging Initia; OASIS3; AIBL Res Grp	beta-amyloid PET harmonisation across longitudinal studies: Application to AIBL, ADNI and OASIS3	NEUROIMAGE																	Bourgeat, Pierrick T/A-1419-2010; Dore, Vincent/A-7750-2011	Bourgeat, Pierrick T/0000-0002-2605-4766; Dore, Vincent/0000-0002-8051-0558													1053-8119	1095-9572				NOV 15	2022	262
J	Hazfiarini, A; Akter, S; Homer, CSE; Zahroh, RI; Bohren, MA				Hazfiarini, Alya; Akter, Shahinoor; Homer, Caroline S. E.; Zahroh, Rana Islamiah; Bohren, Meghan A.			'We are going into battle without appropriate armour': A qualitative study of Indonesian midwives' experiences in providing maternity care during the COVID-19 pandemic	WOMEN AND BIRTH																	; Zahroh, Rana Islamiah/AAL-2469-2021; Homer, Caroline/J-2101-2014	Bohren, Meghan/0000-0002-4179-4682; Hazfiarini, Alya/0000-0002-2097-0245; Zahroh, Rana Islamiah/0000-0001-7831-2336; Homer, Caroline/0000-0002-7454-3011; AKTER, SHAHINOOR/0000-0002-5236-3597													1871-5192	1878-1799				SEP	2022	35	5
J	Shinde, AS; Mahendra, BM; Nejakar, S; Herur, SM; Bhat, N				Shinde, Ashwini S.; Mahendra, B. M.; Nejakar, Santosh; Herur, Santosh M.; Bhat, Nagaraj			Performance analysis of machine learning algorithm of detection and classification of brain tumor using computer vision	ADVANCES IN ENGINEERING SOFTWARE																	Bhat, Nagaraj/AAQ-2911-2021; Herur, Santosh M/ADM-7941-2022	Herur, Santosh M/0000-0002-8159-030X													0965-9978	1873-5339				NOV	2022	173
J	Gates, M; Gates, A; Pieper, D; Fernandes, RM; Tricco, AC; Moher, D; Brennan, SE; Li, TJ; Pollock, M; Lunny, C; Sepulveda, D; McKenzie, JE; Scott, SD; Robinson, KA; Matthias, K; Bougioukas, KI; Fusar-Poli, P; Whiting, P; Moss, SJ; Hartling, L				Gates, Michelle; Gates, Allison; Pieper, Dawid; Fernandes, Ricardo M.; Tricco, Andrea C.; Moher, David; Brennan, Sue E.; Li, Tianjing; Pollock, Michelle; Lunny, Carole; Sepulveda, Dino; McKenzie, Joanne E.; Scott, Shannon D.; Robinson, Karen A.; Matthias, Katja; Bougioukas, Konstantinos, I; Fusar-Poli, Paolo; Whiting, Penny; Moss, Stephana J.; Hartling, Lisa			Reporting guideline for overviews of reviews of healthcare interventions: development of the PRIOR statement	BMJ-BRITISH MEDICAL JOURNAL																	Bougioukas, Konstantinos I./ABE-7673-2020; Fusar-Poli, Paolo/D-8605-2011	Bougioukas, Konstantinos I./0000-0002-6533-1391; Sepulveda Viveros, Dino/0000-0002-5568-0950; Matthias, Katja/0000-0002-7934-0256; Fusar-Poli, Paolo/0000-0003-3582-6788; Li, Tianjing/0000-0001-5371-4558													0959-535X	1756-1833				AUG 9	2022	378
J	Sethi, M; Rani, S; Singh, A; Mazon, JLV				Sethi, Monika; Rani, Shalli; Singh, Aman; Mazon, Juan Luis Vidal			A CAD System for Alzheimer's Disease Classification Using Neuroimaging MRI 2D Slices	COMPUTATIONAL AND MATHEMATICAL METHODS IN MEDICINE																		Singh, Aman/0000-0001-6571-327X; Vidal Mazon, Juan Luis/0000-0002-0982-815X; Rani, Shalli/0000-0002-8474-9435													1748-670X	1748-6718				AUG 9	2022	2022
J	Li, M; Xiao, HJ; Xin, ZM; Li, X; Li, JR; Miri, A; Cao, QQ				Li, Min; Xiao, Huijie; Xin, Zhiming; Li, Xing; Li, Junran; Miri, Abbas; Cao, Qiqi			Soil Seed Bank Characteristics of Nitraria tangutorum Nebkhas in a Desert-Oasis Ecotone	FRONTIERS IN ENVIRONMENTAL SCIENCE																																2296-665X				AUG 4	2022	10
J	Shevnina, E; Potes, M; Vihma, T; Naakka, T; Dhote, PR; Thakur, PK				Shevnina, Elena; Potes, Miguel; Vihma, Timo; Naakka, Tuomas; Dhote, Pankaj Ramji; Thakur, Praveen Kumar			Evaporation over a glacial lake in Antarctica	CRYOSPHERE																		Dhote, Pankaj R./0000-0002-3483-0059; Shevnina, Elena/0000-0003-0739-9977; Potes, Miguel/0000-0002-8912-5277													1994-0416	1994-0424				AUG 2	2022	16	8
J	Akulava, V; Miamin, U; Akhremchuk, K; Valentovich, L; Dolgikh, A; Shapaval, V				Akulava, Volha; Miamin, Uladzislau; Akhremchuk, Katsiaryna; Valentovich, Leonid; Dolgikh, Andrey; Shapaval, Volha			Isolation, Physiological Characterization, and Antibiotic Susceptibility Testing of Fast-Growing Bacteria from the Sea-Affected Temporary Meltwater Ponds in the Thala Hills Oasis (Enderby Land, East Antarctica)	BIOLOGY-BASEL																	Dolgikh, Andrey/D-2575-2015	Dolgikh, Andrey/0000-0002-9316-9440; Valentovich, Leonid/0000-0001-7329-743X; Akhremchuk, Katsiaryna/0000-0002-3195-6529; Shapaval, Volha/0000-0003-2674-1328														2079-7737				AUG	2022	11	8
J	Anderson, CM; Biver, N; Bjoraker, GL; Cavalie, T; Chin, G; DiSanti, MA; Hartogh, P; Tielens, A; Walker, CK				Anderson, Carrie M.; Biver, Nicolas; Bjoraker, Gordon L.; Cavalie, Thibault; Chin, Gordon; DiSanti, Michael A.; Hartogh, Paul; Tielens, Alexander; Walker, Christopher K.			Solar System Science with the Orbiting Astronomical Satellite Investigating Stellar Systems (OASIS) Observatory	SPACE SCIENCE REVIEWS																															0038-6308	1572-9672				AUG	2022	218	5
J	Kumar, SVA; Yaghoubi, E; Proenca, H				Kumar, S. V. Aruna; Yaghoubi, Ehsan; Proenca, Hugo			A Fuzzy Consensus Clustering Algorithm for MRI Brain Tissue Segmentation	APPLIED SCIENCES-BASEL																	Yaghoubi, Ehsan/AAL-6698-2021; S V, Dr. Aruna Kumar/D-4083-2015	Yaghoubi, Ehsan/0000-0003-3639-266X; S V, Dr. Aruna Kumar/0000-0002-8953-2921														2076-3417				AUG	2022	12	15
J	Reyes-Puente, AL; Pena-Portilla, DG; Alcala-Reyes, S; Rodriguez-Bustos, L; Nunez, JM				Luisa Reyes-Puente, Ana; Guadalupe Pena-Portilla, Dalia; Alcala-Reyes, Sofia; Rodriguez-Bustos, Laura; Manuel Nunez, Juan			Changes in Food Environment Patterns in the Metropolitan Area of the Valley of Mexico, 2010-2020	INTERNATIONAL JOURNAL OF ENVIRONMENTAL RESEARCH AND PUBLIC HEALTH																		Rodriguez-Bustos, Laura Alicia/0000-0002-3839-9788														1660-4601				AUG	2022	19	15
J	Murillo-Garcia, A; Leon-Llamas, JL; Villafaina, S; Gusi, N				Murillo-Garcia, Alvaro; Leon-Llamas, Juan Luis; Villafaina, Santos; Gusi, Narcis			Fibromyalgia impact in the prefrontal cortex subfields: An assessment with MRI	CLINICAL NEUROLOGY AND NEUROSURGERY																	Gusi, Narcis/C-3870-2010	Gusi, Narcis/0000-0002-1001-8883													0303-8467	1872-6968				AUG	2022	219
J	Zhang, YG; Yang, HL; Zhuo, L				Zhang, Yigong; Yang, Honglan; Zhuo, Lu			COMPARISON OF DESICCATION TOLERANCE OF DESERT MOSS SYNTRICHIA CANINERVIS IN TISSUE CULTURE AND SAND CULTURE	PAKISTAN JOURNAL OF BOTANY																															0556-3321	2070-3368				AUG	2022	54	4
J	Nagi, K; Karantanis, E; Mallitt, KA				Nagi, Kusam; Karantanis, Emmanuel; Mallitt, Kylie-Ann			Do doctors preferring forceps encounter more obstetric anal sphincter injuries: A retrospective analysis	AUSTRALIAN & NEW ZEALAND JOURNAL OF OBSTETRICS & GYNAECOLOGY																	Mallitt, Kylie-Ann/GPF-9322-2022; Mallitt, Kylie-Ann/E-2240-2011	Mallitt, Kylie-Ann/0000-0002-5722-7287; Mallitt, Kylie-Ann/0000-0002-5722-7287													0004-8666	1479-828X
J	Baldwin, H; Radua, J; Antoniades, M; Haas, SS; Frangou, S; Agartz, I; Allen, P; Andreassen, OA; Atkinson, K; Bachman, P; Baeza, I; Bartholomeusz, CF; Chee, MWL; Colibazzi, T; Cooper, RE; Corcoran, CM; Cropley, VL; Ebdrup, BH; Fortea, A; Glenthoj, LB; Hamilton, HK; Haut, KM; Hayes, RA; He, Y; Heekeren, K; Kaess, M; Kasai, K; Katagiri, N; Kim, M; Kindler, J; Klaunig, MJ; Koike, S; Koppel, A; Kriste…				Baldwin, Helen; Radua, Joaquim; Antoniades, Mathilde; Haas, Shalaila S.; Frangou, Sophia; Agartz, Ingrid; Allen, Paul; Andreassen, Ole A.; Atkinson, Kimberley; Bachman, Peter; Baeza, Inmaculada; Bartholomeusz, Cali F.; Chee, Michael W. L.; Colibazzi, Tiziano; Cooper, Rebecca E.; Corcoran, Cheryl M.; Cropley, Vanessa L.; Ebdrup, Bjorn H.; Fortea, Adriana; Glenthoj, Louise Birkedal; Hamilton, Holly…		ENIGMA Clinical High Risk Psychosi	Neuroanatomical heterogeneity and homogeneity in individuals at clinical high risk for psychosis	TRANSLATIONAL PSYCHIATRY																	Reyes, Francisco/AAV-3883-2021; de la Fuente-Sandoval, Camilo/L-1363-2014; Omel'chenko, MA/K-6508-2016; Baeza, Inmaculada/GQI-3365-2022; Cooper, Rebecca/ACV-4903-2022; Pantelis, Christos/H-7722-2014; Kasai, Kiyoto/GSJ-1237-2022; Uhlhaas, Peter/G-4310-2018	Reyes, Francisco/0000-0003-0772-4119; de la Fuente-Sandoval, Camilo/0000-0003-0773-1642; Omel'chenko, MA/0000-0001-8343-168X; Cooper, Rebecca/0000-0002-7056-5141; Pantelis, Christos/0000-0002-9565-0238; Kasai, Kiyoto/0000-0002-4443-4535; Glenthoj, Louise Birkedal/0000-0003-3621-8450; Zhou, Juan/0000-0002-0180-8648; Smigielski, Lukasz/0000-0002-7428-7644; Andreassen, Ole A./0000-0002-4461-3568; Uh…													2158-3188					JUL 26	2022	12	1
J	Guirado, E; Delgado-Baquerizo, M; Martinez-Valderrama, J; Tabik, S; Alcaraz-Segura, D; Maestre, FT				Guirado, Emilio; Delgado-Baquerizo, Manuel; Martinez-Valderrama, Jaime; Tabik, Siham; Alcaraz-Segura, Domingo; Maestre, Fernando T.			Climate legacies drive the distribution and future restoration potential of dryland forests	NATURE PLANTS																	Delgado-Baquerizo, Manuel/L-3653-2017; Guirado, Emilio/D-2321-2019; Alcaraz-Segura, Domingo/B-8063-2008; Maestre, Fernando T./A-6825-2008; Guirado, Emilio/GOG-9161-2022; Martinez-Valderrama, Jaime/L-1891-2015	Delgado-Baquerizo, Manuel/0000-0002-6499-576X; Alcaraz-Segura, Domingo/0000-0001-8988-4540; Maestre, Fernando T./0000-0002-7434-4856; Guirado, Emilio/0000-0001-5348-7391; Tabik, Siham/0000-0003-4093-5356; Martinez-Valderrama, Jaime/0000-0001-5859-5674													2055-026X	2055-0278				AUG	2022	8	8
J	Luo, FM; Xiao, HJ; Gao, JL; Ma, Y; Li, X; Li, JR; Miri, A; Cao, QQ; Xin, ZM				Luo, Fengmin; Xiao, Huijie; Gao, Junliang; Ma, Yuan; Li, Xing; Li, Junran; Miri, Abbas; Cao, Qiqi; Xin, Zhiming			Microclimate and Wind Regime of Three Typical Landscapes in the Northeastern Ulan Buh Desert	FRONTIERS IN ENVIRONMENTAL SCIENCE																																2296-665X				JUL 25	2022	10
J	Rajivgandhi, G; Ramachandran, G; Vijayan, R; Quero, F; Maruthupandy, M; Alharbi, NS; Kadaikunnan, S; Natesan, M; Li, WJ				Rajivgandhi, Govindan; Ramachandran, Govindan; Vijayan, Ramachandran; Quero, Franck; Maruthupandy, Muthuchamy; Alharbi, Naiyf S.; Kadaikunnan, Shine; Natesan, Manoharan; Li, Wen-Jun			Anti-ESBL derivatives of marine endophytic Streptomyces xiamenensis GRG 5 (KY457709) against ESBL producing bacteria	NEW JOURNAL OF CHEMISTRY																	Kadaikunnan, Shine/L-2836-2013; Govindan, Rajivgandhi/ABG-5120-2021	Kadaikunnan, Shine/0000-0001-7018-5379; Govindan, Rajivgandhi/0000-0003-4907-8100; Quero, Franck/0000-0002-5535-5242													1144-0546	1369-9261				AUG 30	2022	46	34
J	Young, R; Bates, L; The, S; King, J				Young, R.; Bates, L.; The, S.; King, J.			Mode of delivery following obstetric anal sphincter injury: a 7-year retrospective review and follow-up cohort survey	INTERNATIONAL UROGYNECOLOGY JOURNAL																		Young, Rebecca/0000-0003-0871-1811													0937-3462	1433-3023				DEC	2022	33	12
J	Campos-Manas, M; Fabregat-Safont, D; Hernandez, F; de Rijke, E; de Voogt, P; van Wezel, A; Bijlsma, L				Campos-Manas, Marina; Fabregat-Safont, David; Hernandez, Felix; de Rijke, Eva; de Voogt, Pim; van Wezel, Annemarie; Bijlsma, Lubertus			Analytical research of pesticide biomarkers in wastewater with application to differences in human	CHEMOSPHERE																	hernandez, felix/M-1530-2014; de Rijke, Eva/K-4214-2013; van Wezel, Annemarie/N-9758-2013	hernandez, felix/0000-0003-1268-3083; Fabregat-Safont, David/0000-0002-2918-227X; de Rijke, Eva/0000-0002-9341-6501; Campos-Manas, Marina Celia/0000-0001-7811-9640; van Wezel, Annemarie/0000-0002-6875-957X													0045-6535	1879-1298				NOV	2022	307		1
J	Lei, ZY; Westerband, AC; Wright, IJ; He, Y; Zhang, WF; Cai, XY; Zhou, ZL; Liu, F; Zhang, YL				Lei, Zhangying; Westerband, Andrea C.; Wright, Ian J.; He, Yang; Zhang, Wangfeng; Cai, Xiaoyan; Zhou, Zhongli; Liu, Fang; Zhang, Yali			Leaf trait covariation and controls on leaf mass per area (LMA) following cotton domestication	ANNALS OF BOTANY																	Wright, Ian/G-4979-2012	Wright, Ian/0000-0001-8338-9143; Westerband, Andrea/0000-0003-4065-9689													0305-7364	1095-8290				SEP 6	2022	130	2
J	Xu, SQ; McVicar, TR; Li, LC; Yu, ZB; Jiang, P; Zhang, YL; Ban, ZX; Xing, WQ; Dong, NP; Zhang, H; Zhang, MJ				Xu, Shiqin; McVicar, Tim R.; Li, Lingcheng; Yu, Zhongbo; Jiang, Peng; Zhang, Yuliang; Ban, Zhaoxin; Xing, Wanqiu; Dong, Ningpeng; Zhang, Hua; Zhang, Mingjun			Globally assessing the hysteresis between sub-diurnal actual evaporation and vapor pressure deficit at the ecosystem scale: Patterns and mechanisms	AGRICULTURAL AND FOREST METEOROLOGY																	Dong, Ningpeng/GLU-3558-2022	Dong, Ningpeng/0000-0002-5226-6180; xing, wanqiu/0000-0002-1714-1809													0168-1923	1873-2240				AUG 15	2022	323
J	Wang, N; Guo, YC; Wei, X; Zhou, MT; Wang, HJ; Bai, YB				Wang, Ning; Guo, Yuchuan; Wei, Xuan; Zhou, Mingtong; Wang, Huijing; Bai, Yunbao			UAV-based remote sensing using visible and multispectral indices for the estimation of vegetation cover in an oasis of a desert	ECOLOGICAL INDICATORS																															1470-160X	1872-7034				AUG	2022	141
J	Tariq, A; Ullah, A; Sardans, J; Zeng, FJ; Graciano, C; Li, XY; Wang, WQ; Ahmed, Z; Ali, S; Zhang, ZH; Gao, YJ; Penuelas, J				Tariq, Akash; Ullah, Abd; Sardans, Jordi; Zeng, Fanjiang; Graciano, Corina; Li, Xiangyi; Wang, Weiqi; Ahmed, Zeeshan; Ali, Sikandar; Zhang, Zhihao; Gao, Yanju; Penuelas, Josep			Alhagi sparsifolia: An ideal phreatophyte for combating desertification and land degradation	SCIENCE OF THE TOTAL ENVIRONMENT																	Penuelas, Josep/D-9704-2011	Penuelas, Josep/0000-0002-7215-0150; Ullah, Dr ABD/0000-0003-1570-0176													0048-9697	1879-1026				OCT 20	2022	844
J	Zhang, YY; Wu, SX; Kang, WR; Tian, ZH				Zhang, Yongyong; Wu, Shaoxiong; Kang, Wenrong; Tian, Zihan			Multiple sources characteristics of root water uptake of crop under oasis farmlands in hyper-arid regions	AGRICULTURAL WATER MANAGEMENT																															0378-3774	1873-2283				SEP 1	2022	271
J	Shi, RC; Tong, L; Du, TS; Shukla, MK; Jiang, XL; Li, DH; Qin, YH				Shi, Rongchao; Tong, Ling; Du, Taisheng; Shukla, Manoj Kumar; Jiang, Xuelian; Li, Donghao; Qin, Yonghui			An integrated model to optimize planting density and sufficient irrigation depth for increasing hybrid maize seeds yield	IRRIGATION SCIENCE																															0342-7188	1432-1319				NOV	2022	40	6
J	White, C; Atchan, M				White, Claire; Atchan, Marjorie			Postpartum management of perineal injury-A critical narrative review of level 1 evidence	MIDWIFERY																		White, Claire/0000-0001-9483-0336													0266-6138	1532-3099				SEP	2022	112
J	Ayyagari, A; Gedela, DR; Mantravadi, KC				Ayyagari, A.; Gedela, D. R.; Mantravadi, K. C.			A prospective RCT comparing luteal phase treatment with estradiol and follicular antagonist for ovarian follicular synchronization in ICSI cycle in women with low ovarian reserve	HUMAN REPRODUCTION																															0268-1161	1460-2350				JUL	2022	37
J	Gambhir, I; Gedela, DR; Mantravadi, KC				Gambhir, I.; Gedela, D. R.; Mantravadi, K. C.			Progesterone Primed Ovarian Stimulation (PPOS) Vs Clomiphene Primed Ovarian Stimulation (CPOS) in high responder (HR) patients undergoing controlled ovarian stimulation - A Randomized Control Trial	HUMAN REPRODUCTION																															0268-1161	1460-2350				JUL	2022	37
J	Gedela, DR; Mantravadi, K; Sundari, S				Gedela, D. R.; Mantravadi, K.; Sundari, S.			A randomized control trial on the effect of intrauterine HCG flushing on reproductive outcomes	HUMAN REPRODUCTION					38th Hybrid Annual Meeting of the European-Society-of-Human-Reproduction-and-Embryology (ESHRE)	JUL 03-06, 2022	Milan, ITALY	European Soc Human Reprod & Embryol																							0268-1161	1460-2350				JUL	2022	37
J	Gedela, G; Mantravadi, KC; Gedela, DR				Gedela, G.; Mantravadi, K. C.; Gedela, D. R.			Optimizing Sperm Selection and Reproductive outcomes by Magnetic Cell Sorting (MACS) for Couples with Raised DFI	HUMAN REPRODUCTION					38th Hybrid Annual Meeting of the European-Society-of-Human-Reproduction-and-Embryology (ESHRE)	JUL 03-06, 2022	Milan, ITALY	European Soc Human Reprod & Embryol																							0268-1161	1460-2350				JUL	2022	37
J	Hamza, MF; Alotaibi, SH; Wei, YZ; Mashaal, NM				Hamza, Mohammed F.; Alotaibi, Saad H.; Wei, Yuezhou; Mashaal, Noha M.			High-Performance Hydrogel Based on Modified Chitosan for Removal of Heavy Metal Ions in Borehole: A Case Study from the Bahariya Oasis, Egypt	CATALYSTS																	Hamza, Mohammed F/AAD-1408-2022	Hamza, Mohammed F/0000-0002-8935-6884; Mashaal, Noha/0000-0002-8880-9095														2073-4344				JUL	2022	12	7
J	Kandru, S; Mantravadi, KC; Gedela, DR				Kandru, S.; Mantravadi, K. C.; Gedela, D. R.			Optimizing Sperm Selection and Reproductive outcomes by Microfluidics for Couples with Raised DFI	HUMAN REPRODUCTION																															0268-1161	1460-2350				JUL	2022	37
J	Lin, YC; Mu, GJ; Xu, LS				Lin, Yongchong; Mu, Guijin; Xu, Lishuai			Grain Size and Sedimentary Sorting Characteristics of Atmospheric Dust in the Cele Oasis, Southern Margin of Taklimakan Desert	SUSTAINABILITY																																2071-1050				JUL	2022	14	13
J	Mahesh, BS; Mello, CNED; Nair, A; Warrier, AK; Mohan, R				Mahesh, B. S.; Mello, Cheryl Noronha E. D.; Nair, Abhilash; Warrier, Anish Kumar; Mohan, Rahul			Environmental Changes and Geomorphological Factors Influencing the Sediment Flux to a Coastal Lake Spanning the Deglacial- Early Holocene Period in East Antarctica	JOURNAL OF THE GEOLOGICAL SOCIETY OF INDIA																	Warrier, Anish Kumar/AAW-8890-2020	Warrier, Anish Kumar/0000-0003-0044-6224													0016-7622	0974-6889				JUL	2022	98	7
J	Mantravadi, KC; Gedela, DR				Mantravadi, K. C.; Gedela, D. R.			MACS Vs Microfluidics Sperm Sorting FOR RAISED SPERM DNA FRAGMENTATION INDEX - A RCT	HUMAN REPRODUCTION																															0268-1161	1460-2350				JUL	2022	37
J	Mathew, ST; Chaitanya, K; Rao, D				Mathew, S. T.; Chaitanya, K.; Rao, D.			Role of PGT-A and ERA to optimise reproductive outcomes of couples with recurrent implantation failure	HUMAN REPRODUCTION																															0268-1161	1460-2350				JUL	2022	37
J	Mittal, G; Mantravadi, KC; Gedela, DR				Mittal, G.; Mantravadi, K. C.; Gedela, D. R.			Reduced sperm count in Indian men post recovery from SARS-CoV-2 (COVID-19) infection: a worrying trend	HUMAN REPRODUCTION																															0268-1161	1460-2350				JUL	2022	37
J	Rayapati, RS; Mantravadi, KC; Gedela, DR				Rayapati, R. S.; Mantravadi, K. C.; Gedela, D. R.			Advanced paternal age men with raised sperm DFI - optimizing sperm selection to improve reproductive outcomes	HUMAN REPRODUCTION																															0268-1161	1460-2350				JUL	2022	37
J	Shivajirao, SDP; Jadhav, N; Sampat, VDP				Shivajirao, Sampat Dumbre Patil; Jadhav, Nikhil; Sampat, Vaishali Dumbre Patil			Management of a Rare Case of Closed Pilon Fracture With Fibula Displaced in the Foot	JOURNAL OF FOOT & ANKLE SURGERY																															1067-2516	1542-2224				JUL-AUG	2022	61	4
J	Wang, LS; He, ZB; Zhao, WZ; Wang, CA; Ma, DK				Wang, Lisha; He, Zhibin; Zhao, Wenzhi; Wang, Chuan; Ma, Dengke			Fine Soil Texture Is Conducive to Crop Productivity and Nitrogen Retention in Irrigated Cropland in a Desert-Oasis Ecotone, Northwest China	AGRONOMY-BASEL																		wang, chuan/0000-0003-0960-855X														2073-4395				JUL	2022	12	7
J	Wu, N; Ge, YX; Abuduwaili, J; Issanova, G; Saparov, G				Wu, Na; Ge, Yongxiao; Abuduwaili, Jilili; Issanova, Gulnura; Saparov, Galymzhan			Insights into Variations and Potential Long-Range Transport of Atmospheric Aerosols from the Aral Sea Basin in Central Asia	REMOTE SENSING																	ge, yongxiao/K-1251-2012	ge, yongxiao/0000-0001-8111-7259; ji, li li/0000-0001-8483-1554; , Wu Na/0000-0001-7205-1390														2072-4292				JUL	2022	14	13
J	Yamanakkanavar, N; Choi, JY; Lee, B				Yamanakkanavar, Nagaraj; Choi, Jae Young; Lee, Bumshik			SM-SegNet: A Lightweight Squeeze M-SegNet for Tissue Segmentation in Brain MRI Scans	SENSORS																		Lee, Bumshik/0000-0003-2482-1869														1424-8220				JUL	2022	22	14
J	Zhao, Y; Xue, J; Wu, N; Hill, RL				Zhao, Ying; Xue, Jie; Wu, Nan; Hill, Robert Lee			An Artificial Oasis in a Deadly Desert: Practices and Enlightenments	WATER																		Zhao, Ying/0000-0003-0346-5631														2073-4441				JUL	2022	14	14
J	Attanasio, LB; Ranchoff, BL; Long, JB; Kjerulff, KH				Attanasio, Laura B.; Ranchoff, Brittany L.; Long, Jaime B.; Kjerulff, Kristen H.			Recovery from Obstetric Anal Sphincter Injury in a Prospective Cohort of First Births	AMERICAN JOURNAL OF PERINATOLOGY																															0735-1631	1098-8785
J	Ferrance, JP				Ferrance, Jerome P.			Solid phase extraction on reverse phase chromatographic media subjected to stresses expected for extraterrestrial implementation	ANALYST																															0003-2654	1364-5528				JUL 22	2022	147	15
J	Riera-Soto, C; Agueero, C; Gonzalez-Maurel, O; Uribe, M; Menzies, A				Riera-Soto, Camila; Agueero, Carolina; Gonzalez-Maurel, Osvaldo; Uribe, Mauricio; Menzies, Andrew			Automated SEM Mineralogy and Archaeological Ceramics: Applications in Formative Period Pottery From the Atacama Desert	FRONTIERS IN EARTH SCIENCE																	González-Maurel, Osvaldo/AAD-5847-2021	Aguero, Carolina/0000-0003-3860-3504; Gonzalez-Maurel, Osvaldo/0000-0002-0860-8454														2296-6463				JUN 29	2022	10
J	Solmi, M; Song, M; Yon, DK; Lee, SW; Fombonne, E; Kim, MS; Park, S; Lee, MH; Hwang, J; Keller, R; Koyanagi, A; Jacob, L; Dragioti, E; Smith, L; Correll, CU; Fusar-Poli, P; Croatto, G; Carvalho, AF; Oh, JW; Lee, S; Gosling, CJ; Cheon, KA; Mavridis, D; Chu, CS; Liang, CS; Radua, J; Boyer, L; Fond, G; Shin, JI; Cortese, S				Solmi, Marco; Song, Minjin; Yon, Dong Keon; Lee, Seung Won; Fombonne, Eric; Kim, Min Seo; Park, Seoyeon; Lee, Min Ho; Hwang, Jimin; Keller, Roberto; Koyanagi, Ai; Jacob, Louis; Dragioti, Elena; Smith, Lee; Correll, Christoph U.; Fusar-Poli, Paolo; Croatto, Giovanni; Carvalho, Andre F.; Oh, Jae Won; Lee, San; Gosling, Corentin J.; Cheon, Keun-Ah; Mavridis, Dimitris; Chu, Che-Sheng; Liang, Chih-Sun…			Incidence, prevalence, and global burden of autism spectrum disorder from 1990 to 2019 across 204 countries	MOLECULAR PSYCHIATRY																	Solmi, Marco/K-3906-2018; Lee, Seung Won/GQQ-7259-2022; Correll, Christoph/D-3530-2011; Jacob, Louis/AAL-3956-2020; Koyanagi, Ai/D-3833-2018; Fombonne, Eric/M-4893-2018	Solmi, Marco/0000-0003-4877-7233; Lee, Seung Won/0000-0001-5632-5208; Correll, Christoph/0000-0002-7254-5646; Jacob, Louis/0000-0003-1071-1239; Koyanagi, Ai/0000-0002-9565-5004; Fombonne, Eric/0000-0002-8605-3538; Yon, Dong Keon/0000-0003-1628-9948; keller, roberto/0000-0002-6873-9827													1359-4184	1476-5578
J	Agundez, JAP; Raux, P; Pak, MV; Cavallo, M; Lancelot, L				Perez Agundez, Jose Antonio; Raux, Pascal; Pak, Manuela Vieira; Cavallo, Marianna; Lancelot, Loeiza			Top-level institutional policies and their implementation at regional level-A difficult equation. The example of the social acceptability of aquaculture development in Malaga, Spain	AQUACULTURE REPORTS																		Raux, Pascal/0000-0002-7902-1028													2352-5134					AUG	2022	25
J	Su, Y; Le, JJ; Han, WX; Wang, CH; Li, KH; Liu, XJ				Su, Yuan; Le, Jiajia; Han, Wenxuan; Wang, Changhui; Li, Kaihui; Liu, Xuejun			Long-term nitrogen addition consistently decreased litter decomposition rates in an alpine grassland	PLANT AND SOIL																	Han, Wenxuan/B-8791-2016	Han, Wenxuan/0000-0001-8678-7147													0032-079X	1573-5036				OCT	2022	479	1-2
J	Cui, FQ; Hamdi, R; He, HL; Yuan, XL; Yang, T; Tang, HP; Wang, BJ; Zhang, Q; Termonia, P; De Maeyer, P				Cui, Fengqi; Hamdi, Rafiq; He, Huili; Yuan, Xiuliang; Yang, Tao; Tang, Haiping; Wang, Bojie; Zhang, Qin; Termonia, Piet; De Maeyer, Philippe			Interplay Between Urbanization and Irrigation on Summer Climate in the Huang-Huai-Hai Plain, China	JOURNAL OF GEOPHYSICAL RESEARCH-ATMOSPHERES																	; De Maeyer, Philippe/F-2985-2011	CUI, FENGQI/0000-0002-8824-0417; De Maeyer, Philippe/0000-0001-8902-3855													2169-897X	2169-8996				JUN 27	2022	127	12
J	Chhablani, J; Ong, J; Rajendran, A; Zhang, XY; Parolini, B; Filloy, A; Wu, LH; Fong, K; Chong, VC; Roca, JA; Liu, XL; Fromow-Guerra, J; Kiire, C				Chhablani, Jay; Ong, Joshua; Rajendran, Anand; Zhang, Xinyuan; Parolini, Barbara; Filloy, Alejandro; Wu, Lihteh; Fong, Kenneth; Chong, Victor; Roca, Jose A.; Liu, Xiaoling; Fromow-Guerra, Jans; Kiire, Christine		SOLS Subthreshold Laser Ophthalmic	Subthreshold laser therapy guidelines for retinal diseases COMMENT	EYE																	Liu, Xiaoling/HGD-3566-2022; liu, xiao/HKE-9880-2023	Zhang, Xinyuan/0000-0002-3372-0798													0950-222X	1476-5454				DEC	2022	36	12
J	Brothers, DS; Driscoll, NW; Kent, GM; Baskin, RL; Harding, AJ; Kell, AM				Brothers, Daniel S.; Driscoll, Neal W.; Kent, Graham M.; Baskin, Robert L.; Harding, Alistair J.; Kell, Annie M.			Seismostratigraphic analysis of Lake Cahuilla sedimentation cycles and fault displacement history beneath the Salton Sea, California, USA	GEOSPHERE																															1553-040X					AUG	2022	18	4
J	Elahi, R; Edmunds, PJ; Gates, RD; Kuffner, IB; Barnes, BB; Chollett, I; Courtney, TA; Guest, JR; Lenz, EA; Toth, LT; Viehman, TS; Williams, ID				Elahi, Robin; Edmunds, Peter J.; Gates, Ruth D.; Kuffner, Ilsa B.; Barnes, Brian B.; Chollett, Iliana; Courtney, Travis A.; Guest, James R.; Lenz, Elizabeth A.; Toth, Lauren T.; Viehman, T. Shay; Williams, Ivor D.			Scale dependence of coral reef oases and their environmental correlates	ECOLOGICAL APPLICATIONS																		Kuffner, Ilsa/0000-0001-8804-7847; Guest, James/0000-0002-9714-9009; Toth, Lauren/0000-0002-2568-802X													1051-0761	1939-5582				OCT	2022	32	7
J	Zheng, Y; Yang, QY; Ren, H; Wang, DJ; Zhao, CM; Zhao, WZ				Zheng, Ying; Yang, Qiyue; Ren, Heng; Wang, Dejin; Zhao, Changming; Zhao, Wenzhi			Spatial pattern variation of artificial sand-binding vegetation based on UAV imagery and its influencing factors in an oasis-desert transitional zone	ECOLOGICAL INDICATORS																															1470-160X	1872-7034				AUG	2022	141
J	Mamoon-ur-Rashid, M; Wajhi-ul-Abbas, S; Ali, H; Beghum, HA; Islam, W; Zaynab, M; Hussain, M; Sayal, OU; Rehman, HU; Latif, A				Mamoon-ur-Rashid, Muhammad; Wajhi-ul-Abbas, Syed; Ali, Habib; Beghum, Hussan Ara; Islam, Waqar; Zaynab, Madiha; Hussain, Mubasher; Sayal, Obaid Ullah; Rehman, Habib Ur; Latif, Asif			Bionomics and management of aphid, Brevicoryne brassicae (Homoptera: Aphididae) on canola (Brassica napus) using Chrysoperla carnea	INTERNATIONAL JOURNAL OF TROPICAL INSECT SCIENCE																	Hussain, Mubasher/HJG-4708-2022; Ali, Habib/J-7526-2019; Hussain, Mubasher/N-8785-2017	Ali, Habib/0000-0003-4650-0345; Hussain, Mubasher/0000-0003-0833-7399													1742-7584	1742-7592				OCT	2022	42	5
J	Salem, BS; Lamanna, MC; O'Connor, PM; El-Qot, GM; Shaker, F; Thabet, WA; El-Sayed, S; Sallam, HM				Salem, Belal S.; Lamanna, Matthew C.; O'Connor, Patrick M.; El-Qot, Gamal M.; Shaker, Fatma; Thabet, Wael A.; El-Sayed, Sanaa; Sallam, Hesham M.			First definitive record of Abelisauridae (Theropoda: Ceratosauria) from the Cretaceous Bahariya Formation, Bahariya Oasis, Western Desert of Egypt	ROYAL SOCIETY OPEN SCIENCE																	OConnor, Patrick M/I-9383-2012; Lamanna, Matthew/E-6045-2019	OConnor, Patrick M/0000-0002-6762-3806; Salem, Belal/0000-0002-9403-8792; Lamanna, Matthew/0000-0001-9845-0728													2054-5703					JUN 8	2022	9	6
J	Luchristt, D; Meekins, AR; Zhao, CW; Grotegut, C; Siddiqui, NY; Alhanti, B; Jelovsek, JE				Luchristt, Douglas; Meekins, Ana Rebecca; Zhao, Congwen; Grotegut, Chad; Siddiqui, Nazema Y.; Alhanti, Brooke; Jelovsek, John Eric			Risk of obstetric anal sphincter injuries at the time of admission for delivery: A clinical prediction model	BJOG-AN INTERNATIONAL JOURNAL OF OBSTETRICS AND GYNAECOLOGY																	Luchristt, Douglas/AAV-8819-2021	Luchristt, Douglas/0000-0002-3534-7800													1470-0328	1471-0528				NOV	2022	129	12
J	Almutawa, AA				Almutawa, Athari Abdulaziz			Date production in the Al-Hassa region, Saudi Arabia in the face of climate change	JOURNAL OF WATER AND CLIMATE CHANGE																		AlMutawa, Athari/0000-0002-3395-9002													2040-2244	2408-9354				JUL	2022	13	7
J	Agoha, CC; Adejuwon, BB; Mgbeojedo, TI; Onwubuariri, CN; Akiang, FB; Ibeneme, SI; Okechukwu, SI; Ofoh, IJ; Njoku, JO				Agoha, C. C.; Adejuwon, B. B.; Mgbeojedo, T., I; Onwubuariri, C. N.; Akiang, F. B.; Ibeneme, S. I.; Okechukwu, S., I; Ofoh, I. J.; Njoku, J. O.			Natural radioactivity assessment and geophysical interpretation of parts of Igarra area, Southern Nigeria	ENVIRONMENTAL MONITORING AND ASSESSMENT																		Agoha, Chidiebere/0000-0002-9513-1358; Ofoh, Ifeyinwa/0000-0001-9466-0875													0167-6369	1573-2959				JUN	2022	194	6
J	Al-Obaidi, JR; Allawi, MY; Al-Taie, BS; Alobaidi, KH; Al-Khayri, JM; Abdullah, S; Ahmad-Kamil, EI				Al-Obaidi, Jameel R.; Allawi, Mohammed Yahya; Al-Taie, Bilal Salim; Alobaidi, Khalid H.; Al-Khayri, Jameel M.; Abdullah, Sumaiyah; Ahmad-Kamil, E., I			The environmental, economic, and social development impact of desertification in Iraq: a review on desertification control measures and mitigation strategies	ENVIRONMENTAL MONITORING AND ASSESSMENT																	Al-Obaidi, Jameel/H-4651-2017; Al-Taie, Bilal Salim/AAN-3886-2021; Alobaidi, Khalid H./AAJ-3003-2020; Allawi, Mohammed Yahya/ABF-7433-2022	Al-Obaidi, Jameel/0000-0002-5705-0223; Al-Taie, Bilal Salim/0000-0001-8667-5153; Alobaidi, Khalid H./0000-0002-4781-4859; Allawi, Mohammed/0000-0002-0897-4577													0167-6369	1573-2959				JUN	2022	194	6
J	Cao, MZ; Chen, YN; Duan, WL; Li, YQ; Qin, JX				Cao, Mengzhu; Chen, Yaning; Duan, Weili; Li, Yaqi; Qin, Jingxiu			Comprehensive Evaluation of Water-Energy-Food System Security in the China-Pakistan Economic Corridor	WATER																	DUAN, Weili/A-1928-2019	DUAN, Weili/0000-0002-1503-8066														2073-4441				JUN	2022	14	12
J	Catalan, A; Tognin, S; Kempton, MJ; Stahl, D; de Pablo, GS; Nelson, B; Pantelis, C; Riecher-Rossler, A; Bressan, R; Barrantes-Vidal, N; Krebs, MO; Nordentoft, M; Ruhrmann, S; Sachs, G; Rutten, BPF; van Os, J; de Haan, L; van der Gaag, M; Valmaggia, LR; McGuire, P				Catalan, Ana; Tognin, Stefania; Kempton, Matthew J.; Stahl, Daniel; Salazar de Pablo, Gonzalo; Nelson, Barnaby; Pantelis, Christos; Riecher-Rossler, Anita; Bressan, Rodrigo; Barrantes-Vidal, Neus; Krebs, Marie-Odile; Nordentoft, Merete; Ruhrmann, Stephan; Sachs, Gabriele; Rutten, Bart P. F.; van Os, Jim; de Haan, Lieuwe; van der Gaag, Mark; Valmaggia, Lucia R.; McGuire, Philip		EU-GEI High Risk Study	Relationship between jumping to conclusions and clinical outcomes in people at clinical high-risk for psychosis	PSYCHOLOGICAL MEDICINE																	Monsonet, manel/AAZ-3152-2021; Ruhrmann, Stephan/AAG-9470-2020; Pantelis, Christos/H-7722-2014; Valmaggia, Lucia/E-9653-2012	Monsonet, manel/0000-0003-1898-3212; Ruhrmann, Stephan/0000-0002-6022-2364; Pantelis, Christos/0000-0002-9565-0238; Valmaggia, Lucia/0000-0001-6099-8464; Catalan, Ana/0000-0002-0418-7904; Rutten, Bart/0000-0002-9834-6346; Sachs, Gabriele/0000-0002-8359-9877; Salazar de Pablo, Gonzalo/0000-0002-6992-0767; Kempton, Matthew/0000-0003-3541-9947													0033-2917	1469-8978				JUN	2022	52	8
J	Chen, P; Wang, S; Liu, YX; Wang, YP; Li, ZD; Wang, YJ; Zhang, HY; Zhang, YS				Chen, Peng; Wang, Shuai; Liu, Yanxu; Wang, Yaping; Li, Zidong; Wang, Yijia; Zhang, Haoyu; Zhang, Yaosheng			Spatio-temporal patterns of oasis dynamics in China's drylands between 1987 and 2017	ENVIRONMENTAL RESEARCH LETTERS																		Chen, Peng/0000-0002-7736-9979													1748-9326					JUN 1	2022	17	6
J	Fusar-Poli, P; Estrade, A; Stanghellini, G; Venables, J; Onwumere, J; Messas, G; Gilardi, L; Nelson, B; Patel, V; Bonoldi, I; Aragona, M; Cabrera, A; Rico, J; Hoque, A; Otaiku, J; Hunter, N; Tamelini, MG; Maschiao, LF; Puchivailo, MC; Piedade, VL; Keri, P; Kpodo, L; Sunkel, C; Bao, JN; Shiers, D; Kuipers, E; Arango, C; Maj, M				Fusar-Poli, Paolo; Estrade, Andres; Stanghellini, Giovanni; Venables, Jemma; Onwumere, Juliana; Messas, Guilherme; Gilardi, Lorenzo; Nelson, Barnaby; Patel, Vikram; Bonoldi, Ilaria; Aragona, Massimiliano; Cabrera, Ana; Rico, Joseba; Hoque, Arif; Otaiku, Jummy; Hunter, Nicholas; Tamelini, Melissa G.; Maschiao, Luca F.; Puchivailo, Mariana Cardoso; Piedade, Valter L.; Keri, Peter; Kpodo, Lily; Sunk…			The lived experience of psychosis: a bottom-up review co-written by experts by experience and academics	WORLD PSYCHIATRY																	Aragona, Massimiliano/GQZ-1973-2022	Puchivailo, Mariana Cardoso/0000-0001-9758-7386													1723-8617	2051-5545				JUN	2022	21	2
J	Khan, A; Zubair, S				Khan, Afreen; Zubair, Swaleha			An Improved Multi-Modal based Machine Learning Approach for the Prognosis of Alzheimer?s disease	JOURNAL OF KING SAUD UNIVERSITY-COMPUTER AND INFORMATION SCIENCES																															1319-1578	2213-1248				JUN	2022	34	6	A
J	Kumarasinghe, P; Leung, L; Young, D; Jennings, T; Xu, RH; Depiazzi, K; Bharadwaj, S; Aldridge, O; Trivedi, A; Foster, A				Kumarasinghe, Panchi; Leung, Lianne; Young, Darcie; Jennings, Travis; Xu, Run Huai; Depiazzi, Kira; Bharadwaj, Sneha; Aldridge, Oscar; Trivedi, Anand; Foster, Amanda			The impact of initiating OASIS (Older Adult Surgical Inpatient Service) on the quantity and quality of goals of patient care documentation in general surgery	AUSTRALASIAN JOURNAL ON AGEING																															1440-6381	1741-6612				JUN	2022	41
J	Ma, LB; Zhang, YQ; Shi, ZH; Dou, HJ				Ma, Libang; Zhang, Yuqing; Shi, Zhihao; Dou, Haojian			The Rural Livability Evaluation and Its Governance Path Based on the Left-Behind Perspective: Evidence from the Oasis Area of the Hexi Corridor in China	SUSTAINABILITY																		Ma, Libang/0000-0003-0235-5801														2071-1050				JUN	2022	14	11
J	Saber, AA; Bhat, SU; Hamid, A; Gabrieli, J; Garamoon, H; Gargini, A; Cantonati, M				Saber, Abdullah A.; Ullah Bhat, Sami; Hamid, Aadil; Gabrieli, Jacopo; Garamoon, Hassan; Gargini, Alessandro; Cantonati, Marco			Chemical Quality and Hydrogeological Settings of the El-Farafra Oasis (Western Desert of Egypt) Groundwater Resources in Relation to Human Uses	APPLIED SCIENCES-BASEL																		Saber, Abdullah/0000-0002-4676-6998; Cantonati, Marco/0000-0003-0179-3842; Hamid, Aadil/0000-0002-2209-738X														2076-3417				JUN	2022	12	11
J	Sun, CJ; Wang, SY; Chen, W				Sun, Congjian; Wang, Shiyu; Chen, Wei			Hydrochemical Characteristics and the Relationship between Surface and Groundwater in a Typical 'Mountain-Oasis' Ecosystem in Central Asia	SUSTAINABILITY																		Sun, Congjian/0000-0002-9767-9667														2071-1050				JUN	2022	14	12
J	Wang, SJ; Lei, SJ; Zhang, MJ; Hughes, C; Crawford, J; Liu, ZF; Qu, DY				Wang, Shengjie; Lei, Shijun; Zhang, Mingjun; Hughes, Catherine; Crawford, Jagoda; Liu, Zhongfang; Qu, Deye			Spatial and Seasonal Isotope Variability in Precipitation across China: Monthly Isoscapes Based on Regionalized Fuzzy Clustering	JOURNAL OF CLIMATE																	Hughes, Catherine/A-1993-2011	Hughes, Catherine/0000-0003-1474-402X; Wang, Shengjie/0000-0001-8095-2674													0894-8755	1520-0442				JUN 1	2022	35	11
J	Wilson, C; Kumarasinghe, P				Wilson, Chris; Kumarasinghe, Panchi			Establishing an older adult surgical inpatient service (OASIS) in a tertiary teaching hospital	AUSTRALASIAN JOURNAL ON AGEING																															1440-6381	1741-6612				JUN	2022	41
J	Yang, T; Li, Q; Hamdi, R; Zou, Q; Chen, X; De Maeyer, P; Cui, FQ; Li, LH				Yang, Tao; Li, Qian; Hamdi, Rafiq; Zou, Qiang; Chen, Xi; De Maeyer, Philippe; Cui, Fengqi; Li, Lanhai			Snowfall climatology in the Tianshan Mountains based on 36 cold seasons of WRF dynamical downscaling simulation	ATMOSPHERIC RESEARCH																	Li, Lanhai/AAE-9967-2020														0169-8095	1873-2895				JUN 1	2022	270
J	Sinharay, RK				Sinharay, Rajib Kumar			Ground Penetrating Radar (GPR) survey over a melting blue ice area (BIA) at the south of Schirmacher Oasis, Dronning Maud Land, East Antarctica	POLAR SCIENCE																		Sinharay, Rajib Kumar/0000-0002-5872-6870													1873-9652	1876-4428				JUN	2022	32
J	Gupta, S; Saravanan, V; Choudhury, A; Alqahtani, A; Abonazel, MR; Babu, KS				Gupta, Suneet; Saravanan, V.; Choudhury, Amarendranath; Alqahtani, Abdullah; Abonazel, Mohamed R.; Babu, K. Suresh			Supervised Computer-Aided Diagnosis (CAD) Methods for Classifying Alzheimer's Disease-Based Neurodegenerative Disorders	COMPUTATIONAL AND MATHEMATICAL METHODS IN MEDICINE																	Choudhury, Amarendranath/A-1581-2018; Kondaveeti, Dr.Suresh babu/AAM-5850-2020; Abonazel, Mohamed R./R-7908-2018	Choudhury, Amarendranath/0000-0002-7042-8139; Abonazel, Mohamed R./0000-0001-6010-001X; babu, suresh/0000-0001-5183-8397; V, Saravanan/0000-0002-9351-1795													1748-670X	1748-6718				MAY 23	2022	2022
J	Shaker, F; Kassab, W				Shaker, Fatma; Kassab, Walid			Calcareous nannofossil biostratigraphy and paleoenvironmental study along the Upper Maastrichtian- Eocene sequence at Eastern and Western Deserts, Egypt	JOURNAL OF AFRICAN EARTH SCIENCES																															1464-343X	1879-1956				SEP	2022	193
J	Xu, WX; Liu, W; Ma, W; Wang, MY; Xu, F; Yang, WK; Walzer, C; Kaczensky, P				Xu, Wenxuan; Liu, Wei; Ma, Wei; Wang, Muyang; Xu, Feng; Yang, Weikang; Walzer, Chris; Kaczensky, Petra			Current status and future challenges for khulan (Equus hemionus) conservation in China	GLOBAL ECOLOGY AND CONSERVATION																	Xu, Feng/A-8626-2011	Xu, Feng/0000-0001-8925-977X														2351-9894				SEP	2022	37
J	Weber, B; Belnap, J; Budel, B; Antoninka, AJ; Barger, NN; Chaudhary, VB; Darrouzet-Nardi, A; Eldridge, DJ; Faist, AM; Ferrenberg, S; Havrilla, CA; Huber-Sannwald, E; Issa, OM; Maestre, FT; Reed, SC; Rodriguez-Caballero, E; Tucker, C; Young, KE; Zhang, YM; Zhao, YG; Zhou, XB; Bowker, MA				Weber, Bettina; Belnap, Jayne; Budel, Burkhard; Antoninka, Anita J.; Barger, Nichole N.; Chaudhary, V. Bala; Darrouzet-Nardi, Anthony; Eldridge, David J.; Faist, Akasha M.; Ferrenberg, Scott; Havrilla, Caroline A.; Huber-Sannwald, Elisabeth; Malam Issa, Oumarou; Maestre, Fernando T.; Reed, Sasha C.; Rodriguez-Caballero, Emilio; Tucker, Colin; Young, Kristina E.; Zhang, Yuanming; Zhao, Yunge; Zhou…			What is a biocrust? A refined, contemporary definition for a broadening research community	BIOLOGICAL REVIEWS																	Maestre, Fernando T./A-6825-2008; Weber, Bettina/G-8316-2016; Rodriguez-Caballero, Emilio/N-9164-2017	Maestre, Fernando T./0000-0002-7434-4856; Weber, Bettina/0000-0002-5453-3967; Rodriguez-Caballero, Emilio/0000-0002-5934-3214; MALAM ISSA, Oumarou/0000-0001-8357-914X													1464-7931	1469-185X				OCT	2022	97	5
J	Huang, XR; Bao, AM; Guo, H; Meng, FH; Zhang, PF; Zheng, GX; Yu, T; Qi, P; Nzabarinda, V; Du, WB				Huang Xiaoran; Bao Anming; Guo Hao; Meng Fanhao; Zhang Pengfei; Zheng Guoxiong; Yu Tao; Qi Peng; Nzabarinda, Vincent; Du Weibing			Spatiotemporal changes of typical glaciers and their responses to climate change in Xinjiang, Northwest China	JOURNAL OF ARID LAND																	du, weibing/HGE-6517-2022; Zheng, Guoxiong/AAX-3597-2021	Zheng, Guoxiong/0000-0002-9126-8357													1674-6767	2194-7783				MAY	2022	14	5
J	Marco, JH; Fonseca, S; Fernandez-Felipe, I; Garcia-Palacios, A; Banos, R; Perez, S; Garcia-Alandete, J; Guillen, V				Marco, Jose H.; Fonseca, Sara; Fernandez-Felipe, Isabel; Garcia-Palacios, Azucena; Banos, Rosa; Perez, Sandra; Garcia-Alandete, Joaquin; Guillen, Veronica			Family connections vs treatment at usual optimized in the treatment of relatives of people with suicidal behavior disorder: study protocol of a randomized control trial	BMC PSYCHIATRY																	BAÑOS, ROSA MARIA/C-6077-2011; Botella, Verónica Guillén/G-8831-2011; Marco, Jose H./AAA-9452-2019; RODRÍGUEZ, SANDRA PÉREZ/G-5847-2019	BAÑOS, ROSA MARIA/0000-0003-0626-7665; Botella, Verónica Guillén/0000-0003-2247-5210; Marco, Jose H./0000-0002-1545-6452; RODRÍGUEZ, SANDRA PÉREZ/0000-0003-1210-8732														1471-244X				MAY 15	2022	22	1
J	Dubey, AK; Kumar, P				Dubey, Aditya Kumar; Kumar, Pankaj			Future projections of heatwave characteristics and dynamics over India using a high-resolution regional earth system model	CLIMATE DYNAMICS																	Dubey, Aditya Kumar/AAM-3756-2021	Dubey, Aditya Kumar/0000-0003-0579-9109													0930-7575	1432-0894
J	Hajlaoui, Y; Jaoua, A; Layeb, SB				Hajlaoui, Yakin; Jaoua, Amel; Layeb, Safa Bhar			Deep reinforcement learning for solving the single container loading problem	ENGINEERING OPTIMIZATION																	LAYEB, SAFA BHAR/D-5534-2019	LAYEB, SAFA BHAR/0000-0003-2536-7872; Jaoua, Amel/0000-0003-3260-8048													0305-215X	1029-0273
J	Hamdan, S; Jouini, O; Cheaitou, A; Jemai, Z; Granberg, TA				Hamdan, Sadeque; Jouini, Oualid; Cheaitou, Ali; Jemai, Zied; Granberg, Tobias Andersson			On the binary formulation of air traffic flow management problems	ANNALS OF OPERATIONS RESEARCH																		Granberg, Tobias/0000-0002-5868-2388; Jemai, Ziad/0000-0001-7679-9670; Jouini, Oualid/0000-0002-9498-165X; Hamdan, Sadeque/0000-0002-5265-0836													0254-5330	1572-9338
J	Sadiki, FZ; Bouymajane, A; Sbiti, M; Channaoui, S; Micalizzi, G; Cacciola, F; Dugo, P; Mondello, L; El Idrissi, M				Sadiki, Fatima Zahra; Bouymajane, Aziz; Sbiti, Mohammed; Channaoui, Souhail; Micalizzi, Giuseppe; Cacciola, Francesco; Dugo, Paola; Mondello, Luigi; El Idrissi, Mostafa			Chemical profile, antibacterial, antioxidant and insecticidal properties of the essential oil from Tetraclinis articulata (Vahl) masters cones	JOURNAL OF ESSENTIAL OIL RESEARCH																	Micalizzi, Giuseppe/HJY-8725-2023														1041-2905	2163-8152				SEP 3	2022	34	5
J	Almasoudi, NM; Asiry, KA; Abo-Elyousr, KAM				Almasoudi, Najeeb M.; Asiry, Khalid A.; Abo-Elyousr, Kamal A. M.			Isolation, identification and efficacy of three bacterial isolates against the red palm weevil, Rhynchophorus ferrugineus (Olivier) (Coleoptera: Curculionidae)	EGYPTIAN JOURNAL OF BIOLOGICAL PEST CONTROL																	Abo-Elyousr, Kamal Ahmed Mohamed/E-1071-2016; almasoudi, najeeb/J-2504-2016; Asiry, Khalid A./ABV-2960-2022	Abo-Elyousr, Kamal Ahmed Mohamed/0000-0002-8425-4790; almasoudi, najeeb/0000-0003-0415-3226; Asiry, Khalid A./0000-0001-6195-7314													1110-1768	2536-9342				MAY 13	2022	32	1
J	Belkin, N; Guy-Haim, T; Rubin-Blum, M; Lazar, A; Sisma-Ventura, G; Kiko, R; Morov, AR; Ozer, T; Gertman, I; Herut, B; Rahav, E				Belkin, Natalia; Guy-Haim, Tamar; Rubin-Blum, Maxim; Lazar, Ayah; Sisma-Ventura, Guy; Kiko, Rainer; Morov, Arseniy R.; Ozer, Tal; Gertman, Isaac; Herut, Barak; Rahav, Eyal			Influence of cyclonic and anticyclonic eddies on plankton in the southeastern Mediterranean Sea during late summertime	OCEAN SCIENCE																		Kiko, Rainer/0000-0002-7851-9107; Guy-Haim, Tamar/0000-0002-6962-0262; Herut, Barak/0000-0002-7093-8753													1812-0784	1812-0792				MAY 13	2022	18	3
J	Wei, WY; Kashagan, K; Li, LH				Wei Wenyu; Kashagan, Kaisar; Li Lanhai			Sensitivities of Wheat and Maize Productivity in Kazakhstan to Future Climate Change Scenarios	INTERNATIONAL JOURNAL OF PLANT PRODUCTION																	Li, Lanhai/AAE-9967-2020														1735-6814	1735-8043				SEP	2022	16	3
J	Catalan, A; Radua, J; McCutcheon, R; Aymerich, C; Pedruzo, B; Gonzalez-Torres, MA; Baldwin, H; Stone, WS; Giuliano, AJ; McGuire, P; Fusar-Poli, P				Catalan, Ana; Radua, Joaquim; McCutcheon, Robert; Aymerich, Claudia; Pedruzo, Borja; Angel Gonzalez-Torres, Miguel; Baldwin, Helen; Stone, William S.; Giuliano, Anthony J.; McGuire, Philip; Fusar-Poli, Paolo			Examining the variability of neurocognitive functioning in individuals at clinical high risk for psychosis: a meta-analysis	TRANSLATIONAL PSYCHIATRY																	McCutcheon, Robert/X-1032-2019; Fusar-Poli, Paolo/D-8605-2011	McCutcheon, Robert/0000-0003-1102-2566; Catalan, Ana/0000-0002-0418-7904; Stone, William/0000-0003-2932-7288; Fusar-Poli, Paolo/0000-0003-3582-6788; Gonzalez-Torres, Miguel Angel/0000-0002-4017-2785; McGuire, Philip/0000-0003-4381-0532													2158-3188					MAY 12	2022	12	1
J	Li, R; Ao, SJ; Xiao, WJ; Schulmann, K; Mao, QG; Song, DF; Tan, Z; Wang, H; Bhandari, S				Li, Rui; Ao, Songjian; Xiao, Wenjiao; Schulmann, Karel; Mao, Qigui; Song, Dongfang; Tan, Zhou; Wang, Hao; Bhandari, Saunak			Tectonic Juxtaposition of Two Independent Paleoproterozoic Arcs by Cenozoic Duplexing in the Arun Tectonic Window of the Eastern Nepalese Himalaya	FRONTIERS IN EARTH SCIENCE																	Xiao (肖文交), Wenjiao/GPT-2503-2022; Ao, Songjian/R-1949-2019; Xiao, Wenjiao/A-2762-2010	Ao, Songjian/0000-0003-0118-6997;														2296-6463				MAY 12	2022	10
J	Yi, XP; Yao, HS; Fan, DY; Zhu, XG; Losciale, P; Zhang, YL; Zhang, WF; Chow, WS				Yi, Xiao-Ping; Yao, He-Sheng; Fan, Da-Yong; Zhu, Xin-Guang; Losciale, Pasquale; Zhang, Ya-Li; Zhang, Wang-Feng; Chow, Wah Soon			The energy cost of repairing photoinactivated photosystem II: an experimental determination in cotton leaf discs	NEW PHYTOLOGIST																		Losciale, Pasquale/0000-0003-2274-3246; fan, dayong/0000-0002-2591-6029													0028-646X	1469-8137				JUL	2022	235	2
J	Li, Y; Song, YG; Kaskaoutis, DG; Zhang, XX; Chen, XL; Shukurov, N; Orozbaev, R				Li, Yue; Song, Yougui; Kaskaoutis, Dimitris G.; Zhang, Xiaoxiao; Chen, Xiuling; Shukurov, Nosir; Orozbaev, Rustam			Atmospheric dust dynamics over Central Asia: A perspective view from loess deposits	GONDWANA RESEARCH																	Shukurov, Nosir/L-1437-2013; Song, yougui/I-8813-2014	Shukurov, Nosir/0000-0002-2622-0509; Song, yougui/0000-0003-0064-3260													1342-937X	1878-0571				SEP	2022	109
J	Zhang, HL; You, SB; Zhang, M; Chen, AQ; Hu, ZY; Liu, Y; Liu, DF; Yuan, P; Tan, Y				Zhang, Houli; You, Shibing; Zhang, Miao; Chen, Anqi; Hu, Zengyun; Liu, Ying; Liu, Difei; Yuan, Pei; Tan, Yi			Empirical Study of Monthly Economic Losses Assessments for Standard Unit Lockdown Due to COVID-19	FRONTIERS IN PUBLIC HEALTH																																2296-2565				MAY 10	2022	10
J	Luna, LP; Radua, J; Fortea, L; Sugranyes, G; Fortea, A; Fusar-Poli, P; Smith, L; Firth, J; Il Shin, J; Brunoni, AR; Husain, MI; Husian, MO; Sair, HI; Mendes, WO; Uchoa, LRA; Berk, M; Maes, M; Daskalakis, ZJ; Frangou, S; Fornaro, M; Vieta, E; Stubbs, B; Solmi, M; Carvalho, AF				Luna, Licia P.; Radua, Joaquim; Fortea, Lydia; Sugranyes, Gisela; Fortea, Adriana; Fusar-Poli, Paolo; Smith, Lee; Firth, Joseph; Il Shin, Jae; Brunoni, Andre R.; Husain, Muhammad I.; Husian, Muhammad O.; Sair, Haris I.; Mendes, Walber O.; Uchoa, Luiz Ricardo A.; Berk, Michael; Maes, Michael; Daskalakis, Zafiris J.; Frangou, Sophia; Fornaro, Michele; Vieta, Eduard; Stubbs, Brendon; Solmi, Marco; C…			A systematic review and meta-analysis of structural and functional brain alterations in individuals with genetic and clinical high-risk for psychosis and bipolar disorder	PROGRESS IN NEURO-PSYCHOPHARMACOLOGY & BIOLOGICAL PSYCHIATRY																	Maes, Michael/B-8546-2011; Solmi, Marco/K-3906-2018; SHIN, JAE IL/J-6922-2017; Russowsky Brunoni, Andre/H-8394-2012	Maes, Michael/0000-0002-2012-871X; Solmi, Marco/0000-0003-4877-7233; SHIN, JAE IL/0000-0003-2326-1820; Russowsky Brunoni, Andre/0000-0002-6310-3571; Radua, Joaquim/0000-0003-1240-5438; Fortea, Adriana/0000-0003-3681-0841													0278-5846	1878-4216				JUL 13	2022	117
J	Wilmeth, DT; Lalonde, SV; Berelson, WM; Petryshyn, V; Celestian, AJ; Beukes, NJ; Awramik, SM; Spear, JR; Mahseredjian, T; Corsetti, FA				Wilmeth, Dylan T.; Lalonde, Stefan, V; Berelson, William M.; Petryshyn, Victoria; Celestian, Aaron J.; Beukes, Nicolas J.; Awramik, Stanley M.; Spear, John R.; Mahseredjian, Taleen; Corsetti, Frank A.			Evidence for benthic oxygen production in Neoarchean lacustrine stromatolites	GEOLOGY																	Spear, John R./ABI-5873-2020														0091-7613	1943-2682				AUG 1	2022	50	8
J	Garcia-Hernandez, EA; Elmoukrie, ME; Leveneur, S; Gourich, B; Vernieres-Hassimi, L				Garcia-Hernandez, Elizabeth Antonia; Elmoukrie, Moulay Elhassane; Leveneur, Sebastien; Gourich, Bouchaib; Vernieres-Hassimi, Lamiae			Global sensitivity analysis to identify influential model input on thermal risk parameters: To cottonseed oil epoxidation	JOURNAL OF LOSS PREVENTION IN THE PROCESS INDUSTRIES																	leveneur, sebastien/F-2833-2018	leveneur, sebastien/0000-0001-9528-6440; VERNIERES-HASSIMI, Lamiae/0000-0002-5695-567X													0950-4230	1873-3352				JUL	2022	77
J	Henselowsky, F; Kindermann, K; Willmes, C; Lammerich-Long, D; Bareth, G; Bubenzer, O				Henselowsky, Felix; Kindermann, Karin; Willmes, Christian; Lammerich-Long, Dorothee; Bareth, Georg; Bubenzer, Olaf			Palaeoenvironments and landscape diversity in Egypt during the Last Interglacial and its implications on the dispersal of Homo sapiens	JOURNAL OF MAPS																	Bareth, Georg/F-3641-2015	Henselowsky, Felix/0000-0003-4145-7958; Bubenzer, Olaf/0000-0002-3199-1156; Willmes, Christian/0000-0002-5566-6542													1744-5647
J	Nie, WS; Kumar, SV; Arsenault, KR; Peters-Lidard, CD; Mladenova, IE; Bergaoui, K; Hazra, A; Zaitchik, BF; Mahanama, SP; McDonnell, R; Mocko, DM; Navari, M				Nie, Wanshu; Kumar, Sujay, V; Arsenault, Kristi R.; Peters-Lidard, Christa D.; Mladenova, Iliana E.; Bergaoui, Karim; Hazra, Abheera; Zaitchik, Benjamin F.; Mahanama, Sarith P.; McDonnell, Rachael; Mocko, David M.; Navari, Mahdi			Towards effective drought monitoring in the Middle East and North Africa (MENA) region: implications from assimilating leaf area index and soil moisture into the Noah-MP land surface model for Morocco	HYDROLOGY AND EARTH SYSTEM SCIENCES																		Arsenault, Kristi/0000-0002-6830-6271; Peters-Lidard, Christa/0000-0003-1255-2876; McDonnell, Rachael/0000-0002-0525-4582; Nie, Wanshu/0000-0003-3639-9570													1027-5606	1607-7938				MAY 6	2022	26	9
J	Zhang, F; Chen, Y; Wang, WW; Jim, CY; Zhang, ZM; Tan, ML; Liu, CJ; Chan, NW; Wang, D; Wang, Z; Rahman, HA				Zhang, Fei; Chen, Yun; Wang, Weiwei; Jim, Chi Yung; Zhang, Zhimin; Tan, Mou Leong; Liu, Changjiang; Chan, Ngai Weng; Wang, Di; Wang, Zheng; Rahman, Haliza Abdul			Impact of land-use/land-cover and landscape pattern on seasonal in-stream water quality in small watersheds	JOURNAL OF CLEANER PRODUCTION																	Chen, Yun/C-8672-2011; Zhang, Fei/AAD-6047-2019; Tan, Mou Leong/N-4678-2017; Liu, Changjiang/GVU-0201-2022	Chen, Yun/0000-0001-6819-6562; Zhang, Fei/0000-0002-1194-8513; Tan, Mou Leong/0000-0003-3939-0336; Jim, C.Y./0000-0003-4052-8363													0959-6526	1879-1786				JUL 10	2022	357
J	Fusar-Poli, P; Sunkel, C; Patel, V				Fusar-Poli, Paolo; Sunkel, Charlene; Patel, Vikram			Associating Violence With Schizophrenia-Risks and Biases	JAMA PSYCHIATRY																	Fusar-Poli, Paolo/D-8605-2011	Fusar-Poli, Paolo/0000-0003-3582-6788													2168-622X	2168-6238				JUL	2022	79	7
J	Siddiqi, MH; Alsayat, A; Alhwaiti, Y; Azad, M; Alruwaili, M; Alanazi, S; Kamruzzaman, MM; Khan, A				Siddiqi, Muhammad Hameed; Alsayat, Ahmed; Alhwaiti, Yousef; Azad, Mohammad; Alruwaili, Madallah; Alanazi, Saad; Kamruzzaman, M. M.; Khan, Asfandyar			A Precise Medical Imaging Approach for Brain MRI Image Classification	COMPUTATIONAL INTELLIGENCE AND NEUROSCIENCE																	Kamruzzaman, M.M./F-6702-2011; Azad, Mohammad Mohiuddin/X-7829-2019	Kamruzzaman, M.M./0000-0001-8464-1523; Azad, Mohammad Mohiuddin/0000-0001-9851-1420; Khan, Asfandyar/0000-0001-5174-0736													1687-5265	1687-5273				MAY 2	2022	2022
J	Wang, JG; Zhang, F; Jim, CY; Chan, NW; Johnson, VC; Liu, CJ; Duan, P; Bahtebay, J				Wang, Jianguo; Zhang, Fei; Jim, Chi-Yung; Chan, Ngai Weng; Johnson, Verner Carl; Liu, Changjiang; Duan, Pan; Bahtebay, Jupar			Spatio-temporal variations and drivers of ecological carrying capacity in a typical mountain-oasis-desert area, Xinjiang, China	ECOLOGICAL ENGINEERING																	Liu, Changjiang/GVU-0201-2022; Zhang, Fei/AAD-6047-2019; 王, 建国/GWZ-2077-2022	Zhang, Fei/0000-0002-1194-8513;													0925-8574	1872-6992				JUL	2022	180
J	Bashir, RN; Bajwa, IS; Abbas, MZ; Rehman, A; Saba, T; Bahaj, SA; Kolivand, H				Bashir, Rab Nawaz; Bajwa, Imran Sarwar; Abbas, Muhammad Zahid; Rehman, Amjad; Saba, Tanzila; Bahaj, Saeed Ali; Kolivand, Hoshang			Internet of things (IoT) assisted soil salinity mapping at irrigation schema level	APPLIED WATER SCIENCE																	; Kolivand, Hoshang/B-2501-2016	Rehman, Amjad/0000-0002-3817-2655; Bahaj, Saeed Ali Omer/0000-0003-4078-0518; Kolivand, Hoshang/0000-0001-5460-5679													2190-5487	2190-5495				MAY	2022	12	5
J	Coghill, D; Chan, C; Ogden, E; Mastroianni, T; Bellgrove, M				Coghill, D.; Chan, C.; Ogden, E.; Mastroianni, T.; Bellgrove, M.			EVIDENCE-BASED GUIDELINE FOR DIAGNOSIS, MANAGEMENT AND TREATMENT OF ATTENTION-DEFICIT HYPERACTIVITY DISORDER	AUSTRALIAN AND NEW ZEALAND JOURNAL OF PSYCHIATRY																															0004-8674	1440-1614				MAY	2022	56	1_SUPPL
J	Guo, AJ; Wei, XY; Zhong, FL; Wang, PL; Song, XY				Guo, Aijun; Wei, Xiaoyun; Zhong, Fanglei; Wang, Penglong; Song, Xiaoyu			Does Cognition of Resources and the Environment Affect Farmers' Production Efficiency? Study of Oasis Agriculture in China	AGRICULTURE-BASEL																		Zhong, Fanglei/0000-0003-0898-3331														2077-0472				MAY	2022	12	5
J	Hernandez, J; Rhimi, S; Kriaa, A; Mariaule, V; Boudaya, H; Drut, A; Jablaoui, A; Mkaouar, H; Saidi, A; Biourge, V; Borgi, MA; Rhimi, M; Maguin, E				Hernandez, Juan; Rhimi, Soufien; Kriaa, Aicha; Mariaule, Vincent; Boudaya, Houda; Drut, Amandine; Jablaoui, Amin; Mkaouar, Hela; Saidi, Amel; Biourge, Vincent; Borgi, Mohamed Ali; Rhimi, Moez; Maguin, Emmanuelle			Domestic Environment and Gut Microbiota: Lessons from Pet Dogs	MICROORGANISMS																	Hernandez, Juan/GZB-2686-2022; Kriaa, Aisha/HLH-2445-2023	Biourge, Vincent/0000-0002-2237-6397; Mariaule, Vincent/0000-0003-2655-0580; Maguin, Emmanuelle/0000-0001-5452-3382; Borgi, Mohamed Ali/0000-0003-1314-9544; RHIMI, Moez/0000-0001-8067-6526; Hernandez, Juan/0000-0002-2093-1692														2076-2607				MAY	2022	10	5
J	Huang, J; Xue, DQ; Wang, CS; Chen, JH				Huang, Jing; Xue, Dongqian; Wang, Chuansheng; Chen, Jiehu			Resource and Environmental Pressures on the Transformation of Planting Industry in Arid Oasis	INTERNATIONAL JOURNAL OF ENVIRONMENTAL RESEARCH AND PUBLIC HEALTH																																1660-4601				MAY	2022	19	10
J	Jiang, YY; Du, WT; Chen, JZ; Wang, CY; Wang, JN; Sun, WX; Chai, X; Ma, LJ; Xu, ZL				Jiang, Youyan; Du, Wentao; Chen, Jizu; Wang, Chunya; Wang, Jinniu; Sun, Wenxuan; Chai, Xian; Ma, Lijuan; Xu, Zhilong			Climatic and Topographical Effects on the Spatiotemporal Variations of Vegetation in Hexi Corridor, Northwestern China	DIVERSITY-BASEL																		Chen, JiZu/0000-0002-3066-0726; Wang, Jinniu/0000-0001-9806-3314														1424-2818				MAY	2022	14	5
J	Khan, I; Luo, MS; Khan, S; Asghar, H; Saeed, M; Khan, S; Khan, A; Humayun, M; Guo, L; Shi, BC				Khan, Iltaf; Luo, Mingsheng; Khan, Sohail; Asghar, Humaira; Saeed, Muhammad; Khan, Shoaib; Khan, Aftab; Humayun, Muhammad; Guo, Lin; Shi, Buchang			Green synthesis of SrO bridged LaFeO3/g-C3N4 nanocomposites for CO2 conversion and bisphenol A degradation with new insights into mechanism	ENVIRONMENTAL RESEARCH																	DR-ILTAF, KHAN/L-8459-2017; KHAN, Dr-ILTAF/CAG-1080-2022; Humayun, Muhammad/M-6632-2015; LUO, MINGSHENG/AAR-3574-2020	DR-ILTAF, KHAN/0000-0001-8045-697X; KHAN, Dr-ILTAF/0000-0001-8045-697X; LUO, MINGSHENG/0000-0001-6124-0946													0013-9351	1096-0953				MAY 1	2022	207
J	Li, DB; Li, XL; He, XL; Yang, G; Du, YJ; Li, XQ				Li, Dongbo; Li, Xiaolong; He, Xinlin; Yang, Guang; Du, Yongjun; Li, Xiaoqian			Groundwater Dynamic Characteristics with the Ecological Threshold in the Northwest China Oasis	SUSTAINABILITY																	li, xiao/HKV-8405-2023; li, xiao/HJP-5134-2023; Li, xiaolong/GRS-9148-2022	yang, guang/0000-0003-2875-1087; he, xinlin/0000-0002-4771-5682; Li, Dongbo/0000-0002-8017-2704														2071-1050				MAY	2022	14	9
J	Liu, BB; Govindan, R; Muthuchamy, M; Cheng, S; Li, XB; Ye, LJ; Wang, LY; Guo, SX; Li, WJ; Alharbi, NS; Khaled, JM; Kadaikunnan, S				Liu, Bing-Bing; Govindan, Rajivgandhi; Muthuchamy, Maruthupandy; Cheng, Shuang; Li, Xuebin; Ye, Lijing; Wang, Lai-you; Guo, Shu-xian; Li, Wen-Jun; Alharbi, Naiyf S.; Khaled, Jamal M.; Kadaikunnan, Shine			Halophilic archaea and their extracellular polymeric compounds in the treatment of high salt wastewater containing phenol	CHEMOSPHERE																	Govindan, Rajivgandhi/ABG-5120-2021; Khaled, Jamal Mohammed Ali/D-8188-2017; Kadaikunnan, Shine/L-2836-2013	Govindan, Rajivgandhi/0000-0003-4907-8100; Khaled, Jamal Mohammed Ali/0000-0003-2442-0790; Kadaikunnan, Shine/0000-0001-7018-5379; Liu, Bingbing/0000-0002-2161-8585													0045-6535	1879-1298				MAY	2022	294
J	Liu, YT; Liu, B; Li, Q; Sun, MX; Li, ML; Wyckhuys, KAG; Wang, PL; Lu, YH				Liu, Yangtian; Liu, Bing; Li, Qian; Sun, Mengxiao; Li, Minlong; Wyckhuys, Kris A. G.; Wang, Peiling; Lu, Yanhui			Perennial Flowering Plants Sustain Natural Enemy Populations in Gobi Desert Oases of Southern Xinjiang, China	INSECTS																		Li, Qian/0000-0003-3548-647X; Lu, Yanhui/0000-0002-6552-0248; Wyckhuys, Kris/0000-0003-0922-488X														2075-4450				MAY	2022	13	5
J	Mohamad, OAA; Liu, YH; Li, L; Ma, JB; Huang, Y; Gao, L; Fang, BZ; Wang, S; El-Baz, AF; Jiang, HC; Li, WJ				Mohamad, Osama Abdalla Abdelshafy; Liu, Yong-Hong; Li, Li; Ma, Jin-Biao; Huang, Yin; Gao, Lei; Fang, Bao-Zhu; Wang, Shuang; El-Baz, Ashraf F.; Jiang, Hong-Chen; Li, Wen-Jun			Synergistic Plant-Microbe Interactions between Endophytic Actinobacteria and Their Role in Plant Growth Promotion and Biological Control of Cotton under Salt Stress	MICROORGANISMS																	Abdalla Abdelshafy Mohamad, Osama/GGS-3886-2022; Hawas, Ashraf Elbaz/P-3863-2017; Jiang, Hongchen/Y-9471-2018	Abdalla Abdelshafy Mohamad, Osama/0000-0002-2234-8273; Hawas, Ashraf Elbaz/0000-0001-6723-7502; Jiang, Hongchen/0000-0003-1271-7028; ma, Jinbiao/0000-0003-0426-3986; Liu, Yong-Hong/0000-0002-7391-7093														2076-2607				MAY	2022	10	5
J	Pellicer-Castell, E; Belenguer-Sapina, C; El Haskouri, J; Amoros, P; Herrero-Martinez, JM; Mauri-Aucejo, AR				Pellicer-Castell, Enric; Belenguer-Sapina, Carolina; El Haskouri, Jamal; Amoros, Pedro; Herrero-Martinez, Jose Manuel; Mauri-Aucejo, Adela R.			Iron-Doped Bimodal Mesoporous Silica Nanomaterials as Sorbents for Solid-Phase Extraction of Perfluoroalkyl Substances in Environmental Water Samples	NANOMATERIALS																	Mauri-Aucejo, Adela R./K-5301-2017; Herrero-Martinez, Jose Manuel/L-5236-2014; EL HASKOURI BENNAGI, JAMAL/H-5477-2015; Amoros, Pedro/M-3622-2018	Mauri-Aucejo, Adela R./0000-0003-2667-5631; Herrero-Martinez, Jose Manuel/0000-0002-8745-3795; EL HASKOURI BENNAGI, JAMAL/0000-0002-8895-1681; Amoros, Pedro/0000-0002-8741-3769; Belenguer-Sapina, Carolina/0000-0002-0545-8833; Pellicer-Castell, Enric/0000-0001-9180-6066														2079-4991				MAY	2022	12	9
J	Rallis, I; Chatzigeorgiou, G; Florido, M; Sedano, F; Procopiou, A; Chertz-Bynichaki, M; Vernadou, E; Plaiti, W; Koulouri, P; Dounas, C; Gerovasileiou, V; Dailianis, T				Rallis, Ioannis; Chatzigeorgiou, Giorgos; Florido, Marta; Sedano, Francisco; Procopiou, Avgi; Chertz-Bynichaki, Melina; Vernadou, Emmanouela; Plaiti, Wanda; Koulouri, Panayota; Dounas, Costas; Gerovasileiou, Vasilis; Dailianis, Thanos			Early Succession Patterns of Benthic Assemblages on Artificial Reefs in the Oligotrophic Eastern Mediterranean Basin	JOURNAL OF MARINE SCIENCE AND ENGINEERING																	Dailianis, Thanos/G-9145-2011; Gerovasileiou, Vasilis/H-6376-2019	Dailianis, Thanos/0000-0002-4102-9331; Gerovasileiou, Vasilis/0000-0002-9143-7480; Koulouri, Panayota (Yolanda)/0000-0002-3418-7980; Rallis, Ioannis/0000-0002-1384-9906; Dounas, Costas/0000-0003-1692-3953; Chatzigeorgiou, Giorgos/0000-0003-3507-6542														2077-1312				MAY	2022	10	5
J	Shinnick, J; Siddique, M; Passarelli, E; Myers, D; Carberry, C				Shinnick, J.; Siddique, M.; Passarelli, E.; Myers, D.; Carberry, C.			Beyond the OASIS: Managing a 10cm postpartum vaginal hematoma complicated by necrosis, rupture, and infection	INTERNATIONAL UROGYNECOLOGY JOURNAL																	Shinnick, Julia/HKM-9298-2023	Shinnick, Julia/0000-0001-8846-064X													0937-3462	1433-3023				MAY	2022	33	SUPPL 1
J	Wang, T; Yang, ZP; Chen, XD; Han, F				Wang, Tian; Yang, Zhaoping; Chen, Xiaodong; Han, Fang			Bibliometric Analysis and Literature Review of Tourism Destination Resilience Research	INTERNATIONAL JOURNAL OF ENVIRONMENTAL RESEARCH AND PUBLIC HEALTH																	Chen, Xiao/GQA-8928-2022	Chen, Xiao/0000-0002-9797-8384														1660-4601				MAY	2022	19	9
J	Wang, ZJ; Li, YJ; Zhu, QH; Tian, LW; Liu, F; Zhang, XY; Sun, J				Wang, Zhijun; Li, Yanjun; Zhu, Qianhao; Tian, Liwen; Liu, Feng; Zhang, Xinyu; Sun, Jie			Transcriptome Profiling Provides New Insights into the Molecular Mechanism Underlying the Sensitivity of Cotton Varieties to Mepiquat Chloride	INTERNATIONAL JOURNAL OF MOLECULAR SCIENCES																	Zhu, Qian-Hao/A-1298-2010	Zhu, Qian-Hao/0000-0002-6505-7417; Sun, Jie/0000-0002-8068-8102; Liu, Feng/0000-0002-4693-8489														1422-0067				MAY	2022	23	9
J	Xue, DP; Dai, H; Liu, Y; Liu, YF; Zhang, L; Lv, WG				Xue, Dongping; Dai, Heng; Liu, Yi; Liu, Yunfei; Zhang, Lei; Lv, Wengai			Interaction Simulation of Vadose Zone Water and Groundwater in Cele Oasis: Assessment of the Impact of Agricultural Intensification, Northwestern China	AGRICULTURE-BASEL																																2077-0472				MAY	2022	12	5
J	Xue, DP; Gui, DW; Dai, H; Liu, Y; Liu, YF; Zhang, L; Ahmed, Z				Xue, Dongping; Gui, Dongwei; Dai, Heng; Liu, Yi; Liu, Yunfei; Zhang, Lei; Ahmed, Zeeshan			Oasis sustainability assessment in arid areas using GRACE satellite data	ENVIRONMENTAL MONITORING AND ASSESSMENT																															0167-6369	1573-2959				MAY	2022	194	5
J	Yao, LL; Zhou, HF; Yan, YJ; Li, LH; Su, Y				Yao, Linlin; Zhou, Hongfei; Yan, Yingjie; Li, Lanhai; Su, Yuan			Projection of hydrothermal condition in Central Asia under four SSP-RCP scenarios	JOURNAL OF ARID LAND																	Li, Lanhai/AAE-9967-2020														1674-6767	2194-7783				MAY	2022	14	5
J	Zhang, P; Lu, Y; Chao, WD; Dong, ZK; Ali, A; Liu, TX; Lu, ZZ				Zhang, Ping; Lu, Yao; Chao, Wendi; Dong, Zhaoke; Ali, Abid; Liu, Tong-Xian; Lu, Zhaozhi			When Does the Prey/Predator Ratio Work for the Effective Biocontrol of Cotton Aphid on Cotton Seedlings?	INSECTS																	; Dong, Zhaoke/N-8435-2015	Lu, Zhaozhi/0000-0002-0535-1809; Dong, Zhaoke/0000-0002-4462-1162														2075-4450				MAY	2022	13	5
J	Jia, TY; Wang, RM; Huang, TZ; Lang, XG; Ma, HR; Shen, B				Jia, Tianyi; Wang, Ruimin; Huang, Tianzheng; Lang, Xianguo; Ma, Haoran; Shen, Bing			Constraining the redox landscape of Mesoproterozoic mat grounds: A possible oxygen oasis in the 'Boring Billion' seafloor	PRECAMBRIAN RESEARCH																	Shen, Bing/D-5355-2009	Shen, Bing/0000-0002-7955-0704													0301-9268	1872-7433				JUL 15	2022	376
J	Ramachandran, G; Chackaravarthi, G; Rajivgandhi, GN; Quero, F; Maruthupandy, M; Alharbi, NS; Kadaikunnan, S; Khaled, JM; Li, WJ				Ramachandran, Govindan; Chackaravarthi, Gnanasekaran; Rajivgandhi, Govindan Nadar; Quero, Franck; Maruthupandy, Muthuchamy; Alharbi, Naiyf S.; Kadaikunnan, Shine; Khaled, Jamal M.; Li, Wen-Jun			Biosorption and adsorption isotherm of chromium (VI) ions in aqueous solution using soil bacteria Bacillus amyloliquefaciens	ENVIRONMENTAL RESEARCH																	Govindan, Rajivgandhi/ABG-5120-2021; Kadaikunnan, Shine/L-2836-2013; Khaled, Jamal Mohammed Ali/D-8188-2017	Govindan, Rajivgandhi/0000-0003-4907-8100; Kadaikunnan, Shine/0000-0001-7018-5379; Khaled, Jamal Mohammed Ali/0000-0003-2442-0790													0013-9351	1096-0953				SEP	2022	212		B
J	Walsh, C				Walsh, Casey			Beyond rules and norms: Heterogeneity, ubiquity, and visibility of groundwaters	WILEY INTERDISCIPLINARY REVIEWS-WATER																	Walsh, Casey/R-1465-2018	Walsh, Casey/0000-0002-6125-6275													2049-1948					JUL	2022	9	4
J	Ouardi, A; Wahid, A; Sadoki, B; Mouhib, N; ELghorba, M				Ouardi, Abderrazak; Wahid, Achraf; Sadoki, Bouchra; Mouhib, Nadia; ELghorba, Mohamed			<p>Effect of residual stresses on the fracture of polypropylene (PPR) pipes</p>	THEORETICAL AND APPLIED FRACTURE MECHANICS																															0167-8442	1872-7638				JUN	2022	119
J	Al-Ameer, AO; Mahfouz, KH; El-Sheikh, I; Metwally, AA				Al-Ameer, Abdullah O.; Mahfouz, Kamel H.; El-Sheikh, Islam; Metwally, Amr A.			Nature of the Paleocene/Eocene boundary (the Dababiya Quarry Member) at El-Ballas area, Qena region, Egypt	JOURNAL OF AFRICAN EARTH SCIENCES																	Mahfouz, Kamel H./C-9298-2018	Mahfouz, Kamel H./0000-0002-2486-1468; Metwally, Amr/0000-0002-0858-7294													1464-343X	1879-1956				AUG	2022	192
J	Collij, LE; Salvado, G; Wottschel, V; Mastenbroek, SE; Schoenmakers, P; Heeman, F; Aksman, L; Wink, AM; Berckel, BNM; van de Flier, WM; Scheltens, P; Visser, PJ; Barkhof, F; Haller, S; Gispert, JD; Alves, IL				Collij, Lyduine E.; Salvado, Gemma; Wottschel, Viktor; Mastenbroek, Sophie E.; Schoenmakers, Pierre; Heeman, Fiona; Aksman, Leon; Wink, Alle Meije; Berckel, Bart N. M.; van de Flier, Wiesje M.; Scheltens, Philip; Visser, Pieter Jelle; Barkhof, Frederik; Haller, Sven; Domingo Gispert, Juan; Alves, Isadora Lopes		Alzheimers Dis Neuroimaging Initia; ALFA Study	Spatial-Temporal Patterns of beta-Amyloid Accumulation A Subtype and Stage Inference Model Analysis	NEUROLOGY																		Barkhof, Frederik/0000-0003-3543-3706; Heeman, Fiona/0000-0001-7769-8329; Haller, Sven/0000-0001-7433-0203; Salvado Blasco, Gemma/0000-0002-5210-9230; Scheltens, Philip/0000-0002-1046-6408													0028-3878	1526-632X				APR 26	2022	98	17
J	Hayton, TW; Shafaat, HS				Hayton, Trevor W.; Shafaat, Hannah S.			Periodic TableTalks: An Oasis of Science within a Conference Desert	INORGANIC CHEMISTRY																															0020-1669	1520-510X				APR 25	2022	61	16
J	Zhang, YY; Kang, WR; Wu, SX				Zhang, Yongyong; Kang, Wenrong; Wu, Shaoxiong			Resource Capture, Growth, and Productivity of Maize (Zea mays L.) in Response to Nighttime Warming Under Oasis Farmlands in Hyper-arid Regions	JOURNAL OF SOIL SCIENCE AND PLANT NUTRITION																		Zhang, Yongyong/0000-0002-2084-5647													0718-9508	0718-9516				SEP	2022	22	3
J	Marx, BA; Fernandez, O; Olaiz, A; Poblet, J; Zamora, G				Marx, Begona Amigo; Fernandez, Oscar; Olaiz, Antonio; Poblet, Josep; Zamora, Gonzalo			On the influence of Variscan inheritance on rifting of the Western Iberian margin	TERRA NOVA																	Poblet, Josep/AAG-7071-2021	Poblet, Josep/0000-0003-3353-8547; Fernandez, Oscar/0000-0003-1584-2684; Olaiz, Antonio/0000-0002-2405-1940													0954-4879	1365-3121				OCT	2022	34	5
J	Prants, SV				Prants, S., V			Marine life at Lagrangian fronts	PROGRESS IN OCEANOGRAPHY																	Prants, Sergey/O-8492-2015														0079-6611	1873-4472				JUN	2022	204
J	Tarasov, PE; Pankova, SV; Long, TW; Leipe, C; Kalinina, KB; Panteleev, AV; Kyzlasov, IL; Wagner, M				Tarasov, Pavel E.; V. Pankova, Svetlana; Long, Tengwen; Leipe, Christian; Kalinina, Kamilla B.; V. Panteleev, Andrey; Kyzlasov, Igor L.; Wagner, Mayke			New results of radiocarbon dating and identification of plant and animal remains from the Oglakhty cemetery provide an insight into the life of the population of southern Siberia in the early 1st millennium CE	QUATERNARY INTERNATIONAL																		Leipe, Christian/0000-0002-0805-2345; Long, Tengwen/0000-0002-8960-3179; Brandt, Luise Orsted/0000-0002-9777-0356													1040-6182	1873-4553				JUN 20	2022	623
J	Brown, LC; Hampton, KC; Bloom, EM; Lawson, D; Cooper, SH; Meier, ER				Brown, Leticia C.; Hampton, Kisha C.; Bloom, Ellen M.; Lawson, DeAuntae; Cooper, Sarah H.; Meier, Emily Riehm			No child left behind: Building a comprehensive sickle cell disease care oasis in the Lake County, Indiana care desert	PEDIATRIC BLOOD & CANCER																															1545-5009	1545-5017				AUG	2022	69	8
J	Shaaban, H; Mostafa, A; Alqarni, AM; Almohamed, Y; Abualrahi, D; Hussein, D; Alghamdi, M				Shaaban, Heba; Mostafa, Ahmed; Alqarni, Abdulmalik M.; Almohamed, Yasmeen; Abualrahi, Duaa; Hussein, Dania; Alghamdi, Meshal			Simultaneous determination of bisphenol A and its analogues in foodstuff using UPLC-MS/MS and assessment of their health risk in adult population	JOURNAL OF FOOD COMPOSITION AND ANALYSIS																		Hussein, Dania/0000-0002-9582-3645													0889-1575	1096-0481				JUL	2022	110
J	Duan, WL; Zou, S; Christidis, N; Schaller, N; Chen, YN; Sahu, N; Li, Z; Fang, GH; Zhou, BT				Duan, Weili; Zou, Shan; Christidis, Nikolaos; Schaller, Nathalie; Chen, Yaning; Sahu, Netrananda; Li, Zhi; Fang, Gonghuan; Zhou, Botao			Changes in temporal inequality of precipitation extremes over China due to anthropogenic forcings	NPJ CLIMATE AND ATMOSPHERIC SCIENCE																	Sahu, Netrananda/ABH-8714-2022; DUAN, Weili/A-1928-2019	Sahu, Netrananda/0000-0001-8505-7185; chen, ya ning/0000-0001-6742-1641; Zou, Shan/0000-0003-3896-5679; zhou, Botao/0000-0002-5995-2378; DUAN, Weili/0000-0002-1503-8066													2397-3722					APR 19	2022	5	1
J	Leshchinskiy, SV; Burkanova, EM				Leshchinskiy, Sergey, V; Burkanova, Elena M.			The Volchia Griva mineral oasis as unique locus for research of the mammoth fauna and the late Pleistocene environment in Northern Eurasia	QUATERNARY RESEARCH																	Leshchinskiy, Sergey/AAG-4661-2019; Burkanova, Elena/GWM-4044-2022														0033-5894	1096-0287				SEP	2022	109
J	Wang, LW; Wang, SJ; Zhang, MJ; Duan, LH; Xia, YJ				Wang, Liwei; Wang, Shengjie; Zhang, Mingjun; Duan, Lihong; Xia, Yijie			An hourly-scale assessment of sub-cloud evaporation effect on precipitation isotopes in a rainshadow oasis of northwest China	ATMOSPHERIC RESEARCH																		Wang, Shengjie/0000-0001-8095-2674													0169-8095	1873-2895				AUG 15	2022	274
J	Arrondo, G; Solmi, M; Dragioti, E; Eudave, L; Ruiz-Goikoetxea, M; Ciaurriz-Larraz, AM; Magallon, S; Carvalho, AF; Cipriani, A; Fusar-Poli, P; Larsson, H; Correll, CU; Cortese, S				Arrondo, Gonzalo; Solmi, Marco; Dragioti, Elena; Eudave, Luis; Ruiz-Goikoetxea, Maite; Ciaurriz-Larraz, Amaia M.; Magallon, Sara; Carvalho, Andre F.; Cipriani, Andrea; Fusar-Poli, Paolo; Larsson, Henrik; Correll, Christoph U.; Cortese, Samuele			Associations between mental and physical conditions in children and adolescents: An umbrella review	NEUROSCIENCE AND BIOBEHAVIORAL REVIEWS																	Correll, Christoph/D-3530-2011; Arrondo, Gonzalo/U-9534-2017; Larsson, Henrik/GYD-5161-2022; Fusar-Poli, Paolo/D-8605-2011	Correll, Christoph/0000-0002-7254-5646; Arrondo, Gonzalo/0000-0003-3085-8959; Larsson, Henrik/0000-0002-6851-3297; Eudave, Luis/0000-0002-3490-0723; Ruiz-Goikoetxea, Maite/0000-0002-3667-9217; solmi, marco/0000-0003-4877-7233; Fusar-Poli, Paolo/0000-0003-3582-6788													0149-7634	1873-7528				JUN	2022	137
J	Wang, JD; Zhang, JS; Li, M; Mao, YY; Mayinuer, Y; Wan, XH				Wang, Jin Da; Zhang, Jing Shang; Li, Meng; Mao, Ying Yan; Mayinuer, Yusufu; Wan, Xiu Hua			Comparison of different pupil dilatation methods for phacoemulsification in eyes with a small pupil	BMC OPHTHALMOLOGY																																1471-2415				APR 18	2022	22	1
J	Wang, YA; Luo, GP; Li, CF; Ma, XF; Zhang, WQ; Shi, HY; Zhang, C; Xie, MJ				Wang, Yuangang; Luo, Geping; Li, Chaofan; Ma, Xiaofei; Zhang, Wenqiang; Shi, Haiyang; Zhang, Chen; Xie, Mingjuan			Net carbon flux from cropland changes in the Central Asian Aral Sea Basin	JOURNAL OF ENVIRONMENTAL MANAGEMENT																	Ma, Xiaofei/ABB-5302-2022	Ma, Xiaofei/0000-0001-9456-0065; Shi, Haiyang/0000-0002-6105-4737; Wang, Yuangang/0000-0003-1207-6670													0301-4797	1095-8630				JUL 15	2022	314
J	Liu, WM; Liu, YE; Liu, GZ; Xie, RZ; Ming, B; Yang, YS; Guo, XX; Wang, KR; Xue, J; Wang, YH; Zhao, RL; Zhang, WJ; Wang, YJ; Bian, SF; Ren, H; Zhao, XY; Liu, P; Chang, JZ; Zhang, GH; Liu, JY; Yuan, LZ; Zhao, HY; Shi, L; Zhang, LL; Yu, L; Gao, JL; Yu, XF; Wang, ZG; Shen, LG; Ji, P; Yang, SZ; Zhang, ZD; Xue, JQ; Ma, XF; Wang, XQ; Lu, TQ; Dong, BC; Li, G; Ma, BX; Li, JQ; Deng, XF; Liu, YH; Yang, Q; Ji…				Liu, Wanmao; Liu, Yuee; Liu, Guangzhou; Xie, Ruizhi; Ming, Bo; Yang, Yunshan; Guo, Xiaoxia; Wang, Keru; Xue, Jun; Wang, Yonghong; Zhao, Rulang; Zhang, Wenjie; Wang, Yongjun; Bian, Shaofeng; Ren, Hong; Zhao, Xiaoyan; Liu, Peng; Chang, Jianzhi; Zhang, Guohe; Liu, Jiayou; Yuan, Liuzheng; Zhao, Haiyan; Shi, Lei; Zhang, Lili; Yu, Lin; Gao, Julin; Yu, Xiaofang; Wang, Zhigang; Shen, Liguo; Ji, Ping; Yan…			Estimation of maize straw production and appropriate straw return rate in China	AGRICULTURE ECOSYSTEMS & ENVIRONMENT																	Lin, Hongjun/G-8462-2011; Shen, Liguo/A-4051-2019; Yang, Yunshan/GLN-3735-2022; Ming, Bo/ABF-5354-2021	Lin, Hongjun/0000-0003-1125-0681; Shen, Liguo/0000-0001-9730-3451; Yang, Yunshan/0000-0002-8148-3459; Ming, Bo/0000-0002-5384-8617													0167-8809	1873-2305				APR 15	2022	328
J	Yuan, Y; Bao, AM; Jiapaer, G; Jiang, LL; De Maeyer, P				Yuan, Ye; Bao, Anming; Jiapaer, Guli; Jiang, Liangliang; De Maeyer, Philippe			Phenology-based seasonal terrestrial vegetation growth response to climate variability with consideration of cumulative effect and biological carryover	SCIENCE OF THE TOTAL ENVIRONMENT																															0048-9697	1879-1026				APR 15	2022	817
J	Zheng, ZC; Liu, BY; Fang, X; Fa, KY; Liu, Z				Zheng, Zicun; Liu, Boyuan; Fang, Xiang; Fa, Keyu; Liu, Zhen			Dryland farm soil may fix atmospheric carbon through autotrophic microbial pathways	CATENA																	Liu, Boyuan/GXV-6469-2022														0341-8162	1872-6887				JUL	2022	214
J	Deep, G; Kaur, J; Singh, SP; Nayak, SR; Kumar, M; Kautish, S				Deep, G.; Kaur, J.; Singh, Simar Preet; Nayak, Soumya Ranjan; Kumar, Manoj; Kautish, Sandeep			MeQryEP: A Texture Based Descriptor for Biomedical Image Retrieval	JOURNAL OF HEALTHCARE ENGINEERING																	Nayak, Soumya Ranjan/S-5908-2018; Kautish, Sandeep/Y-5555-2019; Singh, Dr. Simar Preet/T-7056-2018	Nayak, Soumya Ranjan/0000-0002-4155-884X; Kautish, Sandeep/0000-0001-5120-5741; Singh, Dr. Simar Preet/0000-0002-2443-7835; Jindal, Gagan/0000-0001-8175-3933													2040-2295	2040-2309				APR 11	2022	2022
J	Boyd, KC; Ames, CJH; Cordova, CE				Boyd, Kelsey C.; Ames, Christopher J. H.; Cordova, Carlos E.			The Middle to Late Pleistocene transition in the Azraq Oasis, Jordan: A phytolith-based reconstruction of wetland palaeoecology	PALAEOGEOGRAPHY PALAEOCLIMATOLOGY PALAEOECOLOGY																		Boyd, Kelsey C./0000-0002-1647-1195													0031-0182	1872-616X				JUN 1	2022	595
J	Meyer, J; Fry, C; Turner, A; Razavi, H				Meyer, Joos; Fry, Carly; Turner, Angus; Razavi, Hessom			Intravitreal dexamethasone versus bevacizumab in Aboriginal and Torres Strait Islander patients with diabetic macular oedema: The OASIS study (a randomised control trial)	CLINICAL AND EXPERIMENTAL OPHTHALMOLOGY																		, Joos/0000-0002-8357-4178													1442-6404	1442-9071				JUL	2022	50	5
J	Coupe, P; Manjon, JV; Mansencal, B; Tourdias, T; Catheline, G; Planche, V				Coupe, Pierrick; Manjon, Jose V.; Mansencal, Boris; Tourdias, Thomas; Catheline, Gwenaelle; Planche, Vincent			Hippocampal-amygdalo-ventricular atrophy score: Alzheimer disease detection using normative and pathological lifespan models	HUMAN BRAIN MAPPING																	Tourdias, Thomas/K-1209-2019; Mansencal, Boris/N-6160-2018	Tourdias, Thomas/0000-0002-7151-6325; Mansencal, Boris/0000-0002-9190-4819; Planche, Vincent/0000-0003-3713-227X; Coupe, Pierrick/0000-0003-2709-3350; Catheline, Gwenaelle/0000-0003-1949-8913													1065-9471	1097-0193				JUL	2022	43	10
J	Flexas, J; Zhang, YL; Gulias, J; Xiong, DL; Carriqui, M; Baraza, E; Du, TT; Lei, ZY; Meng, HF; Dou, HT; Ribas-Carbo, M; Xiang, D; Xu, WB				Flexas, Jaume; Zhang, Yali; Gulias, Javier; Xiong, Dongliang; Carriqui, Marc; Baraza, Elena; Du, Tingting; Lei, Zhangying; Meng, Haofeng; Dou, Haitao; Ribas-Carbo, Miquel; Xiang, Dao; Xu, Wenbin			Leaf physiological traits of plants from the Qinghai-Tibet Plateau and other arid sites in China: Identifying susceptible species and well-adapted extremophiles	JOURNAL OF PLANT PHYSIOLOGY																	Xiong, Dongliang/P-6618-2014; Carriquí, Marc/I-5544-2014	Xiong, Dongliang/0000-0002-6332-2627; Carriquí, Marc/0000-0002-0153-2602													0176-1617	1618-1328				MAY	2022	272
J	Sun, TT; Zhou, J; Shi, LL; Feng, WT; Dippold, MA; Zang, HD; Kurganova, I; de Gerenyu, VL; Kalinina, O; Giani, L; Kuzyakov, Y				Sun, Tingting; Zhou, Jie; Shi, Lingling; Feng, Wenting; Dippold, Michaela A.; Zang, Huadong; Kurganova, Irina; de Gerenyu, Valentin Lopes; Kalinina, Olga; Giani, Louise; Kuzyakov, Yakov			Microbial growth rates, carbon use efficiency and enzyme activities during post-agricultural soil restoration	CATENA																	Dippold, Michaela A/C-1548-2017	Dippold, Michaela/0000-0002-3657-4693													0341-8162	1872-6887				JUL	2022	214
J	Tahouri, J; Sadiki, A; Karrat, L; Johnson, VC; Chan, NW; Fei, Z; Kung, HT				Tahouri, Jad; Sadiki, Abdelhamid; Karrat, L'houcine; Johnson, Verner Carl; Chan, Ngai Weng; Fei, Zhang; Kung, Hsiang Te			Using a modified PAP/RAC model and GIS-for mapping water erosion and causal risk factors: Case study of the Asfalou watershed, Morocco	INTERNATIONAL SOIL AND WATER CONSERVATION RESEARCH																		Tahouri, Jad/0000-0002-6416-9257													2095-6339	2589-059X				JUN	2022	10	2
J	Aladwani, NS				Aladwani, Najeeb S.			Qualitative and quantitative analysis of the crust base structure using Kuwait gravity anomaly maps in the determination of new oil fields	KUWAIT JOURNAL OF SCIENCE																	Aladwani, Najeeb/ABC-8027-2021	Aladwani, Najeeb/0000-0003-2081-3124													2307-4108	2307-4116				APR	2022	49	2
J	Berkouk, D; Bouzir, TAK; Boucherit, S; Khelil, S; Mahaya, C; Matallah, ME; Mazouz, S				Berkouk, Djihed; Bouzir, Tallal Abdel Karim; Boucherit, Samiha; Khelil, Sara; Mahaya, Chafik; Matallah, Mohamed Elhadi; Mazouz, Said			Exploring the Multisensory Interaction between Luminous, Thermal and Auditory Environments through the Spatial Promenade Experience: A Case Study of a University Campus in an Oasis Settlement	SUSTAINABILITY																	Bouzir, Tallal Abdel Karim/GRS-2164-2022; Mazouz, Said/GPX-6121-2022; Matallah, Mohamed Elhadi/AGA-4503-2022; BERKOUK, Djihed/GQG-8768-2022	Bouzir, Tallal Abdel Karim/0000-0002-1902-1800; mahaya, chafik/0000-0001-8617-9977; Mazouz, Said/0000-0002-0832-3504; BERKOUK, Djihed/0000-0002-2925-3015; Matallah, Mohamed Elhadi/0000-0002-2089-8044; Boucherit, Samiha/0000-0002-5101-3608														2071-1050				APR	2022	14	7
J	Brophy, SK; Garb, MP; Naujokaityte, J; Witts, JD; Landman, NH; Cochran, JK; Brezina, J				Brophy, Shannon K.; Garb, Matthew P.; Naujokaityte, Jone; Witts, James D.; Landman, Neil H.; Cochran, J. Kirk; Brezina, Jamie			Methane seeps as refugia during ash falls in the Late Cretaceous Western Interior Seaway of North America	GEOLOGY																		Witts, James/0000-0002-4002-415X													0091-7613	1943-2682				APR 1	2022	50	4
J	Deepa, N; Chokkalingam, SP				Deepa, N.; Chokkalingam, S. P.			Optimization of VGG16 utilizing the Arithmetic Optimization Algorithm for early detection of Alzheimer's disease	BIOMEDICAL SIGNAL PROCESSING AND CONTROL																	N, Deepa/AHB-4252-2022	N, Deepa/0000-0001-7551-4987													1746-8094	1746-8108				APR	2022	74
J	Diaz-Saez, MC; Navarro-Fernandez, G; Fernandez-Carnero, J; Garrigos-Pedron, M; Munoz, JPR; Beltran-Alacreu, H				Diaz-Saez, Marta C.; Navarro-Fernandez, Gonzalo; Fernandez-Carnero, Josue; Garrigos-Pedron, Miriam; Munoz, Juan Pablo Romero; Beltran-Alacreu, Hector			Conventional Cervical Exercises Compared with a Mixed-Reality-Based Game in Asymptomatic Subjects: An Exploratory Crossover Pilot Study	APPLIED SCIENCES-BASEL																	Beltran-Alacreu, Hector/AAX-9925-2020; Romero, Juan Pablo/Y-6765-2018	Beltran-Alacreu, Hector/0000-0002-1971-1510; Romero, Juan Pablo/0000-0002-3190-1296; FERNANDEZ-CARNERO, JOSUE/0000-0002-1314-624X; Garrigos Pedron, Miriam/0000-0002-6264-3824														2076-3417				APR	2022	12	7
J	Hachoun, Z; Ouerdane, A; Yahiaoui, I; Gulakhmadov, A; Chen, X				Hachoun, Zoubir; Ouerdane, Abdallah; Yahiaoui, Ibrahim; Gulakhmadov, Aminjon; Chen, Xi			RETRACTION: Investigating the sensing properties of SnO2 nanoparticles doped with gold (Retraction of Vol 127, Pg 1, 2021)	APPLIED PHYSICS A-MATERIALS SCIENCE & PROCESSING																		Gulakhmadov, Aminjon/0000-0002-7289-8310													0947-8396	1432-0630				APR	2022	128	4
J	Lee, XQ; Yang, F; Xing, Y; Huang, YM; Xu, L; Liu, ZT; Holtzman, R; Kan, I; Li, YL; Zhang, LK; Zhou, H				Lee, Xinqing; Yang, Fang; Xing, Ying; Huang, Yimin; Xu, Liang; Liu, Zhongtang; Holtzman, Ran; Kan, Iddo; Li, Yunlong; Zhang, Like; Zhou, Hui			Use of biochar to manage soil salts and water: Effects and mechanisms	CATENA																	Holtzman, Ran/G-7630-2012	Holtzman, Ran/0000-0003-0826-6826													0341-8162	1872-6887				APR	2022	211
J	Li, Q; Liu, Y; Meko, DM; Nakatsuka, T; Pan, YN; Song, HM; Liu, RS; Sun, CF; Fang, CX				Li, Qiang; Liu, Yu; Meko, David M.; Nakatsuka, Takeshi; Pan, Yingnan; Song, Huiming; Liu, Ruoshi; Sun, Changfeng; Fang, Congxi			Water Resource Management Implications for a Desert Oasis From Tree-Ring delta O-18 Variations in Populus Euphratica in Northwest China	WATER RESOURCES RESEARCH																	Sun, Changfeng/X-2375-2019	Sun, Changfeng/0000-0001-8648-8120; Li, Qiang/0000-0001-7763-8115													0043-1397	1944-7973				APR	2022	58	4
J	Mahjoubi, I; Bossenbroek, L; Berger, E; Fror, O				Mahjoubi, Imane; Bossenbroek, Lisa; Berger, Elisabeth; Froer, Oliver			Analyzing Stakeholder Perceptions of Water Ecosystem Services to Enhance Resilience in the Middle Draa Valley, Southern Morocco	SUSTAINABILITY																		BOSSENBROEK, LISA/0000-0003-1310-619X; Mahjoubi, Imane/0000-0002-9753-5479														2071-1050				APR	2022	14	8
J	Nistal-Nuno, B				Nistal-Nuno, Beatriz			Developing machine learning models for prediction of mortality in the medical intensive care unit	COMPUTER METHODS AND PROGRAMS IN BIOMEDICINE																	Nistal-Nuño, Beatriz/AFS-7236-2022	Nistal-Nuño, Beatriz/0000-0003-2210-0726													0169-2607	1872-7565				APR	2022	216
J	Qin, JX; Duan, WL; Chen, YN; Dukhovny, VA; Sorokin, D; Li, YP; Wang, XX				Qin, Jingxiu; Duan, Weili; Chen, Yaning; Dukhovny, Viktor A.; Sorokin, Denis; Li, Yupeng; Wang, Xuanxuan			Comprehensive evaluation and sustainable development of water-energy-food-ecology systems in Central Asia	RENEWABLE & SUSTAINABLE ENERGY REVIEWS																	DUAN, Weili/A-1928-2019	DUAN, Weili/0000-0002-1503-8066													1364-0321	1879-0690				APR	2022	157
J	Rafik, A; Ibouh, H; El Fels, AE; Eddahby, L; Mezzane, D; Bousfoul, M; Amazirh, A; Ouhamdouch, S; Bahir, M; Gourfi, A; Dhiba, D; Chehbouni, A				Rafik, Abdellatif; Ibouh, Hassan; El Fels, Abdelhafid El Alaoui; Eddahby, Lhou; Mezzane, Daoud; Bousfoul, Mohamed; Amazirh, Abdelhakim; Ouhamdouch, Salah; Bahir, Mohammed; Gourfi, Abdelali; Dhiba, Driss; Chehbouni, Abdelghani			Soil Salinity Detection and Mapping in an Environment under Water Stress between 1984 and 2018 (Case of the Largest Oasis in Africa-Morocco)	REMOTE SENSING																	RAFIK, Abdellatif/AGV-0081-2022; Abdelali, GOURFI/GMW-9672-2022; chehbouni, abdelghani/K-2096-2016	RAFIK, Abdellatif/0000-0003-2034-4460; Abdelali, GOURFI/0000-0003-3487-2870; Ouhamdouch, Salah/0000-0003-4064-8322; Ibouh, Hassan/0000-0002-3287-9537; Amazirh, Abdelhakim/0000-0002-6665-3843; Bahir, Mohammed/0000-0003-0041-9832; EL ALAOUI EL FELS, Abdelhafid/0000-0001-8083-5427; chehbouni, abdelghani/0000-0002-0270-1690; DHIBA, Driss/0000-0001-8431-9649														2072-4292				APR	2022	14	7
J	Saber, M; Mokhtar, M; Bakheit, A; Elfeky, AM; Gameh, M; Mostafa, A; Sefelnasr, A; Kantoush, SA; Sumi, T; Hori, T; Hamada, A				Saber, Mohamed; Mokhtar, Mohamed; Bakheit, Abudeif; Elfeky, Ahmed M.; Gameh, Mohsen; Mostafa, Ashraf; Sefelnasr, Ahmed; Kantoush, Sameh A.; Sumi, Tetsuya; Hori, Tomoharu; Hamada, Alhosein			An integrated assessment approach for fossil groundwater quality and crop water requirements in the El-Kharga Oasis, Western Desert, Egypt	JOURNAL OF HYDROLOGY-REGIONAL STUDIES																		Sumi, Tetsuya/0000-0002-1423-7477														2214-5818				APR	2022	40
J	Salami, F; Bozorgi-Amiri, A; Hassan, GM; Tavakkoli-Moghaddam, R; Datta, A				Salami, Farzaneh; Bozorgi-Amiri, Ali; Hassan, Ghulam Mubashar; Tavakkoli-Moghaddam, Reza; Datta, Amitava			Designing a clinical decision support system for Alzheimer's diagnosis on OASIS-3 data set	BIOMEDICAL SIGNAL PROCESSING AND CONTROL																	Hassan, Ghulam Mubashar/GLU-3011-2022	Datta, Amitava/0000-0001-6916-7907; Hassan, Ghulam Mubashar/0000-0002-6636-8807													1746-8094	1746-8108				APR	2022	74
J	Samantaray, AK; Edavoor, PJ; Rahulkar, AD				Samantaray, Aswini K.; Edavoor, Pranose J.; Rahulkar, Amol D.			A New Approach to the Design and Implementation of a Family of Multiplier Free Orthogonal Wavelet Filter Banks	IEEE TRANSACTIONS ON CIRCUITS AND SYSTEMS FOR VIDEO TECHNOLOGY																		Samantaray, Aswini/0000-0001-8646-1550													1051-8215	1558-2205				APR	2022	32	4
J	Van der Meeren, T; Verschuren, D; Sylvestre, F; Nassour, YA; Naudts, EL; Ortiz, LEA; Deschamps, P; Tachikawa, K; Bard, E; Schuster, M; Abderamane, M				Van der Meeren, Thijs; Verschuren, Dirk; Sylvestre, Florence; Nassour, Yacoub A.; Naudts, Evi L.; Ortiz, Luis E. Aguilar; Deschamps, Pierre; Tachikawa, Kazuyo; Bard, Edouard; Schuster, Mathieu; Abderamane, Moussa			A predominantly tropical influence on late Holocene hydroclimate variation in the hyperarid central Sahara	SCIENCE ADVANCES																	; Deschamps, Pierre/M-9632-2013	Yacoub, Abdallah Nassour/0000-0002-5929-3974; Deschamps, Pierre/0000-0003-1687-3765; Bard, Edouard/0000-0002-7237-8622; Schuster, Mathieu/0000-0002-4412-8685; Verschuren, Dirk/0000-0002-9116-5446													2375-2548					APR	2022	8	14
J	Wang, WR; Chen, YN; Chen, YP; Wang, WH; Zhang, TJ; Qin, JX				Wang, Wanrui; Chen, Yaning; Chen, Yapeng; Wang, Weihua; Zhang, Tianju; Qin, Jingxiu			Groundwater dynamic influenced by intense anthropogenic activities in a dried-up river oasis of Central Asia	HYDROLOGY RESEARCH																															1998-9563	2224-7955				APR	2022	53	4
J	Zhang, L; Cao, XL; Yao, ZQ; Dong, X; Chen, MX; Xiao, LF; Zhao, SF				Zhang, Lu; Cao, Xiaolei; Yao, Zhaoqun; Dong, Xue; Chen, Meixiu; Xiao, Lifeng; Zhao, Sifeng			Identification of risk areas for Orobanche cumana and Phelipanche aegyptiaca in China, based on the major host plant and CMIP6 climate scenarios	ECOLOGY AND EVOLUTION																															2045-7758					APR	2022	12	4
J	Al-Saeedi, AH				Al-Saeedi, Abdullah H.			Characterizing physical and hydraulic properties of soils in Al-Ahsa, Kingdom of Saudi Arabia	SAUDI JOURNAL OF BIOLOGICAL SCIENCES																															1319-562X	2213-7106				MAY	2022	29	5
J	Andersen, GL; Krzywinski, K; Talib, M; Musa, MAM				Andersen, Gidske L.; Krzywinski, Knut; Talib, Mohammed; Musa, Mohammed A. M.			Endangered Dracaena ombet Population in the Red Sea Hills, Sudan, Recovers After Abrupt Change	FRONTIERS IN ENVIRONMENTAL SCIENCE																																2296-665X				MAR 31	2022	10
J	Shao, DN; Zhu, QH; Liang, Q; Wang, XF; Li, YJ; Sun, YQ; Zhang, XY; Liu, F; Xue, F; Sun, J				Shao, Dongnan; Zhu, Qian-hao; Liang, Qian; Wang, Xuefeng; Li, Yanjun; Sun, Yuqiang; Zhang, Xinyu; Liu, Feng; Xue, Fei; Sun, Jie			Transcriptome Analysis Reveals Differences in Anthocyanin Accumulation in Cotton (Gossypium hirsutum L.) Induced by Red and Blue Light	FRONTIERS IN PLANT SCIENCE																	Zhu, Qian-Hao/A-1298-2010	Zhu, Qian-Hao/0000-0002-6505-7417; Shao, Dongnan/0000-0002-4860-3244; fei, Xue/0000-0001-6311-1961													1664-462X					MAR 31	2022	13
J	He, LT; Gibbon, VE; Xiao, XY; Wang, B; Li, HJ				He, Letian; Gibbon, Victoria E.; Xiao, Xiaoyong; Wang, Bo; Li, Haijun			Metastatic cancer along ancient Silk Road: A possible case from Xinjiang (China)	INTERNATIONAL JOURNAL OF PALEOPATHOLOGY																	Gibbon, Victoria Elaine/AAO-3706-2021	Gibbon, Victoria Elaine/0000-0001-7875-3297													1879-9817	1879-9825				JUN	2022	37
J	Rao, RV; Prasad, TJC				Rao, R. Varaprasada; Prasad, T. Jaya Chandra			An efficient content-based medical image retrieval based on a new Canny steerable texture filter and Brownian motion weighted deep learning neural network	VISUAL COMPUTER																															0178-2789	1432-2315
J	Inam, F; Mumtaz, AS; Kaleem, M; Sajid, I				Inam, Farooq; Mumtaz, Abdul S.; Kaleem, Muhammad; Sajid, Imran			Morphogenetic variation and assorted biological activities in true branching Nostocales strains of Cholistan oasis, Pakistan	JOURNAL OF BASIC MICROBIOLOGY																	Mumtaz, Abdul Samad/A-1565-2019	Mumtaz, Abdul Samad/0000-0002-7034-9203													0233-111X	1521-4028				MAY	2022	62	5
J	Wadhera, A; Agarwal, M				Wadhera, Ankita; Agarwal, Megha			Low dimensional multi-block neighborhood combination pattern for biomedical image retrieval	MULTIMEDIA TOOLS AND APPLICATIONS																		Agarwal, Megha/0000-0003-3434-6555													1380-7501	1573-7721				AUG	2022	81	19
J	Abd El-Sattar, H; Kamel, S; Hassan, MH; Jurado, F				Abd El-Sattar, Hoda; Kamel, Salah; Hassan, Mohamed H.; Jurado, Francisco			Optimal sizing of an off-grid hybrid photovoltaic/biomass gasifier/battery system using a quantum model of Runge Kutta algorithm	ENERGY CONVERSION AND MANAGEMENT																	Salamaa, Mohamed Hosny Hassan/AAY-1132-2021; El-Sattar, Hoda Abd/CAA-5899-2022; Hassan, Mohamed Hosny/GLT-6826-2022; Salamaa, Mohamed Hosny Hassn/GLT-6822-2022	Salamaa, Mohamed Hosny Hassan/0000-0003-1754-4883; Salamaa, Mohamed Hosny Hassn/0000-0003-1754-4883; Abd El-Sattar, Hoda/0000-0002-8945-5225													0196-8904	1879-2227				APR 15	2022	258
J	Mufti, A; Tir, M; Zarei, A; Contreras, MD; Gomez-Cruz, I; Feriani, A; Ghazouani, L; Saadaoui, E; Allagui, MS; Harrath, AH; Ramazani, A; Tlili, N				Mufti, Afoua; Tir, Meriam; Zarei, Armin; Contreras, Maria del Mar; Gomez-Cruz, Irene; Feriani, Anouar; Ghazouani, Lakhdar; Saadaoui, Ezzeddine; Allagui, Mohamed Salah; Harrath, Abdel Halim; Ramazani, Ali; Tlili, Nizar			Phytochemical Profiling of Ephedra alata subsp. alenda Seeds by High-Performance Liquid Chromatography-Electrospray Ionization-Quadrupole-Time-of-Flight-Mass Spectrometry (HPLC-ESI-QTOF-MS), Molecular Docking, and Antioxidant, Anti-diabetic, and Acetylcholinesterase Inhibition	ANALYTICAL LETTERS																	Cruz, Irene/GSE-1559-2022; Cruz, Irene Gómez/AAL-3241-2020; Harrath, Abdel Halim/K-2166-2014	Cruz, Irene Gómez/0000-0002-1856-001X; Harrath, Abdel Halim/0000-0002-2170-1303; CONTRERAS, MARIA DEL MAR/0000-0002-3407-0088													0003-2719	1532-236X				OCT 13	2022	55	15
J	Tariq, A; Graciano, C; Pan, KW; Olatunji, OA; Li, ZL; Sadia, S; Zhang, ZH; Ismoilov, K; Ahmed, Z; Abd Ullah; Zeng, FJ				Tariq, Akash; Graciano, Corina; Pan, Kaiwen; Olatunji, Olusanya Abiodun; Li, Zilong; Sadia, Sehrish; Zhang, Zhihao; Ismoilov, Khasan; Ahmed, Zeeshan; Abd Ullah; Zeng, Fanjiang			Phosphorus fertilization of Phoebe zhennan seedlings under drought reduces nitrogen assimilation	JOURNAL OF PLANT NUTRITION																	Ismoilov, Khasan/HKV-1011-2023; Zhang, Zhihao/AFP-6470-2022	Zhang, Zhihao/0000-0002-3260-7195; Pan, Kaiwen/0000-0003-1770-8219; OLATUNJI, Olusanya Abiodun/0000-0002-4334-9021; Tariq, Akash/0000-0002-5382-9336; Ullah, Dr ABD/0000-0003-1570-0176													0190-4167	1532-4087				AUG 27	2022	45	14
J	Lamhour, K; Rouway, M; Mrajji, O; Tizliouine, A; Omari, LE; Salhi, H; Chakhchaoui, N; Cherkaoui, O; El Wazna, M				Lamhour, Kawtar; Rouway, Marwane; Mrajji, Ouahiba; Tizliouine, Abdeslam; Omari, Lhaj El Hachemi; Salhi, Hayat; Chakhchaoui, Nabil; Cherkaoui, Omar; El Wazna, Mohamed			Extraction and characterization of Alfa fibers and their use to produce Alfa/wool woven fabrics for composite reinforcement	INTERNATIONAL POLYMER PROCESSING																		TIZLIOUINE, ABDESLAM/0000-0002-4491-5603													0930-777X	2195-8602				MAY 25	2022	37	2
J	Sun, HW; Chen, JN; Yang, Y; Yan, D; Xue, J; Wang, JF; Zhang, WX				Sun, Huaiwei; Chen, Jianing; Yang, Yong; Yan, Dong; Xue, Jie; Wang, Jingfeng; Zhang, Wenxin			Assessment of long-term water stress for ecosystems across China using the maximum entropy production theory-based evapotranspiration product	JOURNAL OF CLEANER PRODUCTION																	wang, jing/GVT-8700-2022; Sun, Huaiwei/AAB-4063-2019; Wang, Jin/GYA-2019-2022; WANG, JINGYI/GSJ-1241-2022; wang, jing/HJA-5384-2022; wang, jing/GRS-7509-2022	Sun, Huaiwei/0000-0003-4873-0697; Zhang, Wenxin/0000-0001-9477-563X; Yang, Yong/0000-0002-3969-3794													0959-6526	1879-1786				MAY 15	2022	349
J	Badr, H; Shosha, EA; Roshdy, H; Mohammed, AAH; Saad, N; Aboelenin, SM; Soliman, MM; El-Tahan, AM; El-Saadony, MT; Yehia, N				Badr, Heba; Shosha, Eman AbdelMenamm; Roshdy, Heba; Mohammed, Ahmed Abd El-Halem; Saad, Noha; Aboelenin, Salama Mostafa; Soliman, Mohamed Mohamed; El-Tahan, Amira M.; El-Saadony, Mohamed T.; Yehia, Nahed			Investigation of many bacterial and viral infections circulating in pigeons showing nervous symptoms	SAUDI JOURNAL OF BIOLOGICAL SCIENCES																	El-Saadony, Mohamed T./ABG-6110-2021; Soliman, Mohamed/ABJ-0997-2022	El-Saadony, Mohamed T./0000-0001-8633-1836;													1319-562X	2213-7106				APR	2022	29	4
J	Karim, K; Awad, MA; Manar, A; Monia, J; Karim, A; Mohammed, E				Karim, Kadri; Awad, Mohamed A.; Manar, Abdelhafidh; Monia, Jemni; Karim, Aounallah; Mohammed, Elsafy			Effect of flowering stage and storage conditions on pollen quality of six male date palm genotypes	SAUDI JOURNAL OF BIOLOGICAL SCIENCES																	Awad, Mohamed/I-7597-2012; karim, kadri/T-1562-2019; Karim, KADRI/AAX-1072-2020	Awad, Mohamed/0000-0002-4121-0747; karim, kadri/0000-0003-2258-6068; Karim, KADRI/0000-0003-2258-6068													1319-562X	2213-7106				APR	2022	29	4
J	Bhakta, S; Rout, TK; Karmakar, D; Pawar, C; Padhy, PK				Bhakta, Sukumar; Rout, Tofan Kumar; Karmakar, Dipti; Pawar, Chandrakant; Padhy, Pratap Kumar			Trace elements and their potential risk assessment on polar ecosystem of Larsemann Hills, East Antarctica	POLAR SCIENCE																		Karmakar, Dipti/0000-0002-2765-5125; Bhakta, Sukumar/0000-0002-3970-7607													1873-9652	1876-4428				MAR	2022	31
J	Amari, R; Guesmi, F; Ben Ali, M; Hedfi, A; Saidi, I; Alghamdi, AS; Albogami, B; Achouri, MS; Allagui, MS				Amari, Ramzi; Guesmi, Fatma; Ben Ali, Manel; Hedfi, Amor; Saidi, Issam; Alghamdi, Akram S.; Albogami, Bander; Achouri, Mohamed Sghaier; Allagui, Mohamed Salah			Immune response in the larva of the dung beetle Phyllognathus excavatus against human blood cells as foreign bodies	JOURNAL OF KING SAUD UNIVERSITY SCIENCE																	Amari, Ramzi/ABD-4440-2020	Amari, Ramzi/0000-0002-6385-1641; Mohamed Sghaier, Achouri/0000-0001-8628-374X; Albogami, Bander/0000-0002-2592-8281; Amor, Hedfi/0000-0002-3476-4178													1018-3647	2213-686X				JUN	2022	34	4
J	Anan, T; Reda, A; El-Belasy, A; El-Shahat, A				Anan, Tarek; Reda, Amina; El-Belasy, Ahmed; El-Shahat, Adam			Facies analysis and sequence stratigraphy of the Middle Miocene Marmarica Formation at Siwa area, north Western Desert, Egypt	GEOLOGICAL JOURNAL																	Reda, Amina/HDM-6219-2022; Anan, Tarek/P-5111-2018	Anan, Tarek/0000-0002-1343-5287													0072-1050	1099-1034				JUL	2022	57	7
J	Kerins, S; Nottage, J; de Pablo, GS; Kempton, MJ; Tognin, S; Niemann, DH; de Haan, L; van Amelsvoort, T; Kwon, JS; Nelson, B; Mizrahi, R; McGuire, P; Fusar-Poli, P				Kerins, Sarah; Nottage, Judith; de Pablo, Gonzalo Salazar; Kempton, Matthew J.; Tognin, Stefania; Niemann, Dorien H.; de Haan, Lieuwe; van Amelsvoort, Therese; Kwon, Jun Soo; Nelson, Barnaby; Mizrahi, Romina; McGuire, Philip; Fusar-Poli, Paolo		PSYSCAN Consortium	Identifying Electroencephalography Biomarkers in Individuals at Clinical High Risk for Psychosis in an International Multi-Site Study	FRONTIERS IN PSYCHIATRY																	Nottage, Judith/HJI-2760-2023	Burrer, Achim/0000-0003-2012-5655; Ayesa-Arriola, Rosa/0000-0003-0570-5352; Kempton, Matthew/0000-0003-3541-9947													1664-0640					MAR 16	2022	13
J	Gomez, ML; Hoke, G; D'Ambrosio, S; Moreiras, S; Castro, A				Laura Gomez, Maria; Hoke, G.; D'Ambrosio, S.; Moreiras, S.; Castro, A.			Review: Hydrogeology of Northern Mendoza (Argentina), from the Andes to the eastern plains, in the context of climate change	HYDROGEOLOGY JOURNAL																		Gomez, Maria Laura/0000-0002-5086-9738													1431-2174	1435-0157				MAY	2022	30	3
J	Yang, ZW; Gao, X; Lei, JQ; Meng, XY; Zhou, N				Yang, Zuowei; Gao, Xin; Lei, Jiaqiang; Meng, Xiaoyu; Zhou, Na			Analysis of spatiotemporal changes and driving factors of desertification in the Africa Sahel	CATENA																															0341-8162	1872-6887				JUN	2022	213
J	Chafi, S; Ballesteros, E				Chafi, Safae; Ballesteros, Evaristo			A sensitive, robust method for determining natural and synthetic hormones in surface and wastewaters by continuous solid-phase extraction-gas chromatography-mass spectrometry	ENVIRONMENTAL SCIENCE AND POLLUTION RESEARCH																	Ballesteros, Evaristo/L-5206-2014	Ballesteros, Evaristo/0000-0002-4802-3477													0944-1344	1614-7499				JUL	2022	29	35
J	Wang, WC; Pang, JY; Zhang, FH; Sun, LP; Yang, L; Siddique, KHM				Wang, Weichao; Pang, Jiayin; Zhang, Fenghua; Sun, Lupeng; Yang, Lei; Siddique, Kadambot H. M.			Transcriptomic and metabolomics-based analysis of key biological pathways reveals the role of lipid metabolism in response to salt stress in the root system of Brassica napus	PLANT GROWTH REGULATION																	Siddique, Kadambot H.M./B-3462-2011; Wang, Weichao/AAE-5178-2022	Siddique, Kadambot H.M./0000-0001-6097-4235; Wang, Weichao/0000-0003-2761-6561; Pang, Jiayin/0000-0002-8127-645X													0167-6903	1573-5087				MAY	2022	97	1
J	Guesmi, F; Saidi, I; Abbassi, R; Saidani, M; Hfaiedh, N; Landoulsi, A				Guesmi, Fatma; Saidi, Issam; Abbassi, Raoudha; Saidani, Mabrouka; Hfaiedh, Najla; Landoulsi, Ahmed			Therapeutic potential of second degree's skin burns by topical dressing of Teucrium ramosissimum that promotes re-epithelialization	DERMATOLOGIC THERAPY																		Guesmi, Fatma/0000-0002-5191-0755													1396-0296	1529-8019				MAY	2022	35	5
J	Thomas, AS; Duchateau, L; Kozma-Wiebe, P; Jaffe, G				Thomas, Akshay S.; Duchateau, Luc; Kozma-Wiebe, Petra; Jaffe, Glenn			Resolution of outer retinal abnormalities in eyes with vitreomacular traction without macular hole in the OASIS trial	BRITISH JOURNAL OF OPHTHALMOLOGY																		Thomas, Akshay/0000-0002-0419-4039													0007-1161	1468-2079
J	Montillo, F; Sforzi, A; Sammuri, G; Duriez, O; Monti, F				Montillo, Francesco; Sforzi, Andrea; Sammuri, Giampiero; Duriez, Olivier; Monti, Flavio			Effectiveness of protected areas for osprey survival at intercontinental scale	BIODIVERSITY AND CONSERVATION																	Monti, Flavio/AAC-7458-2019; Sforzi, Andrea/AAZ-7430-2021; Duriez, Olivier/R-4772-2016	Monti, Flavio/0000-0001-8835-1021; Sforzi, Andrea/0000-0002-7640-084X; Duriez, Olivier/0000-0003-1868-9750													0960-3115	1572-9710				MAR	2022	31	4
J	Kharrich, M; Abualigah, L; Kamel, S; AbdEl-Sattar, H; Tostado-Veliz, M				Kharrich, Mohammed; Abualigah, Laith; Kamel, Salah; AbdEl-Sattar, Hoda; Tostado-Veliz, Marcos			An Improved Arithmetic Optimization Algorithm for design of a microgrid with energy storage system: Case study of El Kharga Oasis, Egypt	JOURNAL OF ENERGY STORAGE																	El-Sattar, Hoda Abd/CAA-5899-2022; Kharrich, Mohammed/AAK-6468-2020; Tostado-Véliz, Marcos/ABE-9027-2021	Kharrich, Mohammed/0000-0002-6199-8447; Abd El-Sattar, Hoda/0000-0002-8945-5225													2352-152X	2352-1538				JUL	2022	51
J	Al Jufaili, SM; Echreshavi, S; Esmaeili, HR; Al Alawi, MK				Al Jufaili, Saud M.; Echreshavi, Sorour; Esmaeili, Hamid Reza; Al Alawi, Majid K.			Scales and otoliths as identity cards of the Indian oil sardine Sardinella longiceps (Teleostei: Clupeiformes) populations: Ultrastructure and ornamentation characteristics using light and scanning electron microscopy	ACTA ZOOLOGICA																	Echreshavi, Sorour/HGE-0350-2022; Esmaeili, Hamid Reza/AAT-7368-2020	Esmaeili, Hamid Reza/0000-0002-9736-397X													0001-7272	1463-6395
J	Liu, FY; You, QA; Xue, X; Peng, F; Huang, CH; Ma, SX; Pan, J; Shi, YF; Chen, XJ				Liu, Feiyao; You, Quangang; Xue, Xian; Peng, Fei; Huang, Cuihua; Ma, Shaoxiu; Pan, Jing; Shi, Yaofang; Chen, Xiaojie			The Stem Sap Flow and Water Sources for Tamarix ramosissima in an Artificial Shelterbelt With a Deep Groundwater Table in Northwest China	FRONTIERS IN PLANT SCIENCE																															1664-462X					MAR 4	2022	13
J	Saini, A; Sahu, N; Duan, WL; Kumar, M; Avtar, R; Mishra, M; Kumar, P; Pandey, R; Behera, S				Saini, Atul; Sahu, Netrananda; Duan, Weili; Kumar, Manish; Avtar, Ram; Mishra, Manoranjan; Kumar, Pankaj; Pandey, Rajiv; Behera, Swadhin			Unraveling Intricacies of Monsoon Attributes in Homogenous Monsoon Regions of India	FRONTIERS IN EARTH SCIENCE																	Saini, Atul/ABE-7114-2020; Sahu, Netrananda/ABH-8714-2022; MISHRA, MANORANJAN/GQQ-5018-2022; DUAN, Weili/A-1928-2019	Saini, Atul/0000-0001-9840-2486; Sahu, Netrananda/0000-0001-8505-7185; MISHRA, MANORANJAN/0000-0003-4545-7218; DUAN, Weili/0000-0002-1503-8066														2296-6463				MAR 4	2022	10
J	Kavitha, C; Mani, V; Srividhya, SR; Khalaf, OI; Romero, CAT				Kavitha, C.; Mani, Vinodhini; Srividhya, S. R.; Khalaf, Osamah Ibrahim; Tavera Romero, Carlos Andres			Early-Stage Alzheimer's Disease Prediction Using Machine Learning Models	FRONTIERS IN PUBLIC HEALTH																	C, Kavitha/ABB-4574-2021; Khalaf, Osamah Ibrahim/AAK-3630-2021; SR, Srividhya/AAY-3713-2020	C, Kavitha/0000-0001-7034-2848; Khalaf, Osamah Ibrahim/0000-0002-4750-8384; SR, Srividhya/0000-0002-7601-8288; Tavera Romero, Carlos Andres/0000-0002-4606-7222														2296-2565				MAR 3	2022	10
J	Yu, T; Jiapaer, G; Bao, AM; Zheng, GX; Zhang, JF; Li, X; Yuan, Y; Huang, XR; Umuhoza, J				Yu, Tao; Jiapaer, Guli; Bao, Anming; Zheng, Guoxiong; Zhang, Junfeng; Li, Xu; Yuan, Ye; Huang, Xiaoran; Umuhoza, Jeanine			Disentangling the relative effects of soil moisture and vapor pressure deficit on photosynthesis in dryland Central Asia	ECOLOGICAL INDICATORS																	Zheng, Guoxiong/AAX-3597-2021	Zheng, Guoxiong/0000-0002-9126-8357													1470-160X	1872-7034				APR	2022	137
J	Alazaiza, MYD; Albahnasawi, A; Copty, NK; Ali, GAM; Bashir, MJK; Abu Amr, SS; Abushammala, MFM; Nassani, DE; Al Maskari, T				Alazaiza, M. Y. D.; Albahnasawi, A.; Copty, N. K.; Ali, G. A. M.; Bashir, M. J. K.; Abu Amr, S. S.; Abushammala, M. F. M.; Nassani, D. E.; Al Maskari, T.			An overview of chemical oxidation-based remediation technologies for non-aqueous phase liquids removal from soil	GLOBAL NEST JOURNAL																	Ali, Gomaa A.M./I-5067-2013; Alazaiza, Motasem/AAS-7007-2020; JK Bashir, Mohammed/I-1132-2014	Ali, Gomaa A.M./0000-0002-7152-531X; Alazaiza, Motasem/0000-0001-6957-4131; JK Bashir, Mohammed/0000-0002-3086-0568; Nassani, Dia Eddin/0000-0002-4196-8822													1790-7632					MAR	2022	24	1
J	Alcott, LJ; Mills, BJW; Bekker, A; Poulton, SW				Alcott, Lewis J.; Mills, Benjamin J. W.; Bekker, Andrey; Poulton, Simon W.			Earth's Great Oxidation Event facilitated by the rise of sedimentary phosphorus recycling	NATURE GEOSCIENCE																		Mills, Benjamin/0000-0002-9141-0931; Bekker, Andrey/0000-0002-1154-0585													1752-0894	1752-0908				MAR	2022	15	3
J	Alnaim, MA; Mohamed, MS; Mohammed, M; Munir, M				Alnaim, Mishari A.; Mohamed, Magdy S.; Mohammed, Maged; Munir, Muhammad			Effects of Automated Irrigation Systems and Water Regimes on Soil Properties, Water Productivity, Yield and Fruit Quality of Date Palm	AGRICULTURE-BASEL																	mohamed, Maged/AAL-1376-2021; Mohammed, Maged/Q-2131-2016; Munir, Muhammad/P-9051-2016	mohamed, Maged/0000-0003-3860-1306; Mohammed, Maged/0000-0003-3860-1306; Munir, Muhammad/0000-0003-2508-4426														2077-0472				MAR	2022	12	3
J	Alrefaee, HA; Soliman, MR; Merghelani, TA				Alrefaee, H. A.; Soliman, M. R.; Merghelani, T. A.			Interpretation of the subsurface tectonic setting of the Natrun Basin, north Western Desert, Egypt using Satellite Bouguer gravity and magnetic data	JOURNAL OF AFRICAN EARTH SCIENCES																															1464-343X	1879-1956				MAR	2022	187
J	Bradai, A; Yahiaoui, I; Douaoui, A; Abdennour, MA; Gulakhmadov, A; Chen, X				Bradai, Abdelhamid; Yahiaoui, Ibrahim; Douaoui, Abdelkader; Abdennour, Mohamed Amine; Gulakhmadov, Aminjon; Chen, Xi			Combined Modeling of Multivariate Analysis and Geostatistics in Assessing Groundwater Irrigation Sustenance in the Middle Cheliff Plain (North Africa)	WATER																	Abdennour, Mohamed Amine/ABE-5121-2021; Douaoui, Abdelkader/HGE-0786-2022	Abdennour, Mohamed Amine/0000-0003-0308-5786; Douaoui, Abdelkader/0000-0002-3941-1312; YAHIAOUI, IBRAHIM/0000-0001-5164-981X; Gulakhmadov, Aminjon/0000-0002-2366-2491; BRADAI, ABDELHAMID/0000-0002-6768-0237														2073-4441				MAR	2022	14	6
J	Comer, JS; Conroy, K; Cornacchio, D; Furr, JM; Norman, SB; Stein, MB				Comer, Jonathan S.; Conroy, Kristina; Cornacchio, Danielle; Furr, Jami M.; Norman, Sonya B.; Stein, Murray B.			Psychometric evaluation of a caregiver-report adaptation of the Overall Anxiety Severity and Impairment Scale (OASIS) for use with youth populations	JOURNAL OF AFFECTIVE DISORDERS																															0165-0327	1573-2517				MAR 1	2022	300
J	Hassan, S; Darwish, M; Tahoun, SS; Radwan, AE				Hassan, Sahar; Darwish, M.; Tahoun, Sameh S.; Radwan, Ahmed E.			An integrated high-resolution image log, sequence stratigraphy and palynofacies analysis to reconstruct the Albian - Cenomanian basin depositional setting and cyclicity: Insights from the southern Tethys	MARINE AND PETROLEUM GEOLOGY																	Hassan, Sahar/ACI-6667-2022	Hassan, Sahar/0000-0003-1993-6821													0264-8172	1873-4073				MAR	2022	137
J	Jenkins, NT; Chapple, AG; Anwei, G; Peacock, L				Jenkins, N. Thompson; Chapple, A. G.; Anwei, G.; Peacock, L.			Obstetric anal sphincter injury (oasis) and pelvic floor disorder awareness and knowledge among women in the second and third trimester of pregnancy	AMERICAN JOURNAL OF OBSTETRICS AND GYNECOLOGY					48th Annual Scientific Meeting of the Society-of-Gynecologic-Surgeons (SGS)	MAR 27-30, 2022	San Antonio, TX	Soc Gynecol Surg																							0002-9378	1097-6868				MAR	2022	226	3
J	Khan, S; Ullah, A; Ullah, S; Saleem, MH; Okla, MK; Al-Hashimi, A; Chen, YL; Ali, S				Khan, Sheharyar; Ullah, Abd; Ullah, Sami; Saleem, Muhammad Hamzah; Okla, Mohammad K.; Al-Hashimi, Abdulrahman; Chen, Yinglong; Ali, Shafaqat			Quantifying Temperature and Osmotic Stress Impact on Seed Germination Rate and Seedling Growth of Eruca sativa Mill. via Hydrothermal Time Model	LIFE-BASEL																	Hamzah Saleem, Muhammad/AAD-5391-2020; OKLA, MOHAMMED/GWC-0601-2022; Chen, Yinglong/D-2104-2011	Hamzah Saleem, Muhammad/0000-0002-3658-770X; Chen, Yinglong/0000-0003-0798-8683; Ali, Shafaqat/0000-0002-3773-5196; Khan, Sheharyar/0000-0002-1996-8009														2075-1729				MAR	2022	12	3
J	Li, CF; Han, QF; Xu, WQ				Li, Chaofan; Han, Qifei; Xu, Wenqiang			Contribution of Climate Change and Grazing on Carbon Dynamics in Central Asian Pasturelands	REMOTE SENSING																		xu, wen qiang/0000-0001-7401-0912														2072-4292				MAR	2022	14	5
J	Matallah, ME; Arrar, HF; Faci, M; Mahar, WA; Ben Ratmia, FZ; Attia, S				Matallah, Mohamed Elhadi; Arrar, Hicham Fawzi; Faci, Mohammed; Mahar, Waqas Ahmed; Ben Ratmia, Fatima Zahra; Attia, Shady			Assessment of Human Outdoor Thermal Comfort in a Palm Grove during the Date Palm Phenological Cycle	ATMOSPHERE																	Attia, Shady/M-4942-2013; Mahar, Waqas Ahmed/W-5991-2018; FACI, Mohammed/ABD-6537-2021; Matallah, Mohamed Elhadi/AGA-4503-2022	Attia, Shady/0000-0002-9477-5098; Mahar, Waqas Ahmed/0000-0003-1478-6246; FACI, Mohammed/0000-0003-0284-1148; Matallah, Mohamed Elhadi/0000-0002-2089-8044; Fawzi Hicham, Arrar/0000-0001-7697-3798														2073-4433				MAR	2022	13	3
J	Mir, R; Fullagar, P; Darijani, M; Smith, R; Scott, S; Ross, M; Shamsipour, P; Chouteau, M; Ansdell, K; Gouiza, M				Mir, Reza; Fullagar, Peter; Darijani, Mehrdad; Smith, Richard; Scott, Shawn; Ross, Martin; Shamsipour, Pejman; Chouteau, Michel; Ansdell, Kevin; Gouiza, Mohamed			Forward modeling and 3D inversion of electromagnetic data collected over the McArthur River uranium deposit in the Athabasca Basin, Canada	GEOPHYSICS																	mir, reza/GWR-3720-2022; Smith, Richard/B-3768-2014	Gouiza, Mohamed/0000-0001-5438-2698; Chouteau, Michel/0000-0002-8538-1775; Mir, Reza/0000-0001-6463-8263; Smith, Richard/0000-0003-2307-6529; Ansdell, Kevin/0000-0002-0911-8537													0016-8033	1942-2156				MAR-APR	2022	87	2
J	Noor, J; Ullah, A; Saleem, MH; Tariq, A; Ullah, S; Waheed, A; Okla, MK; Al-Hashimi, A; Chen, YL; Ahmed, Z; Ahmad, I				Noor, Javaria; Ullah, Abd; Saleem, Muhammad Hamzah; Tariq, Akash; Ullah, Sami; Waheed, Abdul; Okla, Mohammad K.; Al-Hashimi, Abdulrahman; Chen, Yinglong; Ahmed, Zeeshan; Ahmad, Izhar			Effect of Jasmonic Acid Foliar Spray on the Morpho-Physiological Mechanism of Salt Stress Tolerance in Two Soybean Varieties (Glycine max L.)	PLANTS-BASEL																	Ullah, Sami/P-5578-2016; Hamzah Saleem, Muhammad/AAD-5391-2020; OKLA, MOHAMMED/GWC-0601-2022; Chen, Yinglong/D-2104-2011	Ullah, Sami/0000-0002-9669-5737; Hamzah Saleem, Muhammad/0000-0002-3658-770X; Chen, Yinglong/0000-0003-0798-8683; Tariq, Akash/0000-0002-5382-9336														2223-7747				MAR	2022	11	5
J	Nunez-Campero, SR; Gonzalez, C; Rull, J; Ovruski, SM				Nunez-Campero, Segundo R.; Gonzalez, Carlos; Rull, Juan; Ovruski, Sergio M.			Maximum Entropy (MaxEnt) as extreme distribution indicator of two Neotropical fruit fly parasitoids in irrigated drylands of Argentina	BULLETIN OF ENTOMOLOGICAL RESEARCH																	Campero, Segundo Ricardo Núñez/AAD-2241-2019	Campero, Segundo Ricardo Núñez/0000-0003-0382-4155													0007-4853	1475-2670				OCT	2022	112	5
J	Orabi, OH; Malarkodi, N; Zahran, E				Orabi, Orabi H.; Malarkodi, N.; Zahran, E.			Factors Controlling the Distribution of Agglutinated Foraminiferal Morphogroups as Palaeoenvironmental Tracers in the Kharga Oasis, Egypt	JOURNAL OF THE GEOLOGICAL SOCIETY OF INDIA																															0016-7622	0974-6889				MAR	2022	98	3
J	Ren, YQ; Liu, JP; Shalamzari, MJ; Arshad, A; Liu, SX; Liu, T; Tao, H				Ren, Yanqun; Liu, Jinping; Shalamzari, Masoud Jafari; Arshad, Arfan; Liu, Suxia; Liu, Tie; Tao, Hui			Monitoring Recent Changes in Drought and Wetness in the Source Region of the Yellow River Basin, China	WATER																	Arshad, Arfan/AAX-6947-2021	Arshad, Arfan/0000-0002-0726-1807; Liu, Jinping/0000-0003-1220-2876														2073-4441				MAR	2022	14	6
J	Sampath, R; Baskar, M				Sampath, Rajaram; Baskar, Manickam			3D brain image-based Alzheimer's disease detection techniques using fish swarm optimizer's deep convolution Siamese neural network	EXPERT SYSTEMS																	Rajaram, Sampath/GLV-6161-2022; M, Dr Baskar/AAQ-8333-2021	Rajaram, Sampath/0000-0001-9806-3912; M, Dr Baskar/0000-0003-4655-7667													0266-4720	1468-0394				NOV	2022	39	9
J	Sekretarev, Y; Myateg, T; Gulakhmadov, A; Safaraliev, M; Mitrofanov, S; Zubova, N; Atamanova, O; Chen, X				Sekretarev, Yury; Myateg, Tatyana; Gulakhmadov, Aminjon; Safaraliev, Murodbek; Mitrofanov, Sergey; Zubova, Natalya; Atamanova, Olga; Chen, Xi			Models of Optimal Operating Modes of the Water-Economic Complex on the Basis of Hydro Resource Price Evaluation	MATHEMATICS																	Safaraliev, Murodbek/AAG-6805-2019; Myateg, Tatiana/GVS-5891-2022; Mitrofanov, Sergey/AAG-8849-2020	Safaraliev, Murodbek/0000-0003-3433-9742; Mitrofanov, Sergey/0000-0003-4401-4730; Gulakhmadov, Aminjon/0000-0002-2366-2491														2227-7390				MAR	2022	10	5
J	Tariq, A; Sardans, J; Penuelas, J; Zhang, ZH; Graciano, C; Zeng, FJ; Olatunji, OA; Ullah, A; Pan, KW				Tariq, Akash; Sardans, Jordi; Penuelas, Josep; Zhang, Zhihao; Graciano, Corina; Zeng, Fanjiang; Olatunji, Olusanya Abiodun; Ullah, Abd; Pan, Kaiwen			Intercropping of Leguminous and Non-Leguminous Desert Plant Species Does Not Facilitate Phosphorus Mineralization and Plant Nutrition	CELLS																	Zhang, Zhihao/AFP-6470-2022; Penuelas, Josep/D-9704-2011; Olatunji, Olusanya Abiodun/AAT-2492-2020; Sardans, Jordi/F-8495-2016	Zhang, Zhihao/0000-0002-3260-7195; Penuelas, Josep/0000-0002-7215-0150; Ullah, Dr ABD/0000-0003-1570-0176; Graciano, Corina/0000-0003-0803-4128; Tariq, Akash/0000-0002-5382-9336; Sardans, Jordi/0000-0003-2478-0219; Pan, Kaiwen/0000-0003-1770-8219; OLATUNJI, Olusanya Abiodun/0000-0002-4334-9021														2073-4409				MAR	2022	11	6
J	Yao, KX; Halike, A; Chen, LM; Wei, QQ				Yao Kaixuan; Halike, Abudureheman; Chen Limei; Wei Qianqian			Spatiotemporal changes of eco-environmental quality based on remote sensing-based ecological index in the Hotan Oasis, Xinjiang	JOURNAL OF ARID LAND																	Chen, Li/HLG-5722-2023	Chen, Li/0000-0001-8824-8542													1674-6767	2194-7783				MAR	2022	14	3
J	Zhang, QF; Sun, CJ; Chen, YN; Chen, W; Xiang, YY; Li, J; Liu, YT				Zhang, Qifei; Sun, Congjian; Chen, Yaning; Chen, Wei; Xiang, Yanyun; Li, Jiao; Liu, Yuting			Recent Oasis Dynamics and Ecological Security in the Tarim River Basin, Central Asia	SUSTAINABILITY																		Sun, Congjian/0000-0002-9767-9667														2071-1050				MAR	2022	14	6
J	Zhang, YY; Jia, AY; Zhao, WZ; Kang, JJ; Wang, CA; Kang, WR; Tian, ZH				Zhang, Yongyong; Jia, Angyuan; Zhao, Wenzhi; Kang, Jianjun; Wang, Chuan; Kang, Wenrong; Tian, Zihan			Soil macroporosity and water flow in the root zone of oases in hyper-arid regions	EUROPEAN JOURNAL OF SOIL SCIENCE																		Zhang, Yongyong/0000-0002-2084-5647													1351-0754	1365-2389				MAR	2022	73	2
J	Chang, JJ; Gong, L; Zeng, FJ; Xue, J; Mao, DL; Cao, YX; Mu, GJ; Wang, SP				Chang, Jingjing; Gong, Lu; Zeng, Fanjiang; Xue, Jie; Mao, Donglei; Cao, Yongxiang; Mu, Guijin; Wang, Shaoping			Using hydro-climate elasticity estimator and geographical detector method to quantify the individual and interactive impacts on NDVI in oasis-desert ecotone	STOCHASTIC ENVIRONMENTAL RESEARCH AND RISK ASSESSMENT																															1436-3240	1436-3259				OCT	2022	36	10
J	Yoshimoto, M; Fukuoka, M; Tsujimoto, Y; Matsui, T; Kobayasi, K; Saito, K; van Oort, PAJ; Inusah, BIY; Vijayalakshmi, C; Vijayalakshmi, D; Weerakoon, WMW; Silva, LC; Myint, TT; Phyo, ZC; Tian, XH; Lur, HS; Yang, CM; Tarpley, L; Manigbas, NL; Hasegawa, T				Yoshimoto, Mayumi; Fukuoka, Minehiko; Tsujimoto, Yasuhiro; Matsui, Tsutomu; Kobayasi, Kazuhiro; Saito, Kazuki; van Oort, Pepijn A. J.; Inusah, Baba I. Y.; Vijayalakshmi, Chenniappan; Vijayalakshmi, Dhashnamurthi; Weerakoon, W. M. W.; Silva, L. C.; Myint, Tin Tin; Phyo, Zar Chi; Tian, Xiaohai; Lur, Huu-Sheng; Yang, Chwen-Ming; Tarpley, Lee; Manigbas, Norvie L.; Hasegawa, Toshihiro			Monitoring canopy micrometeorology in diverse climates to improve the prediction of heat-induced spikelet sterility in rice under climate change	AGRICULTURAL AND FOREST METEOROLOGY																	Manigbas, Norvie L/HKE-9157-2023														0168-1923	1873-2240				APR 1	2022	316
J	Heard, AW; Bekker, A; Kovalick, A; Tsikos, H; Ireland, T; Dauphas, N				Heard, Andy W.; Bekker, Andrey; Kovalick, Alex; Tsikos, Harilaos; Ireland, Thomas; Dauphas, Nicolas			Oxygen production and rapid iron oxidation in stromatolites immediately predating the Great Oxidation Event	EARTH AND PLANETARY SCIENCE LETTERS																		Heard, Andy/0000-0002-7593-644X													0012-821X	1385-013X				MAR 15	2022	582
J	Booth, A; Wester, AL				Booth, Amy; Wester, Astrid Louise			A multivariable analysis of the contribution of socioeconomic and environmental factors to blood culture Escherichia Coli resistant to fluoroquinolones in high- and middle-income countries	BMC PUBLIC HEALTH																		Booth, Amy/0000-0003-2319-9246														1471-2458				FEB 19	2022	22	1
J	Zhou, QM; Huang, JY; Hu, ZY; Yin, G				Zhou, Qiming; Huang, Junyi; Hu, Zengyun; Yin, Gang			Spatial-temporal changes to GRACE-derived terrestrial water storage in response to climate change in arid Northwest China	HYDROLOGICAL SCIENCES JOURNAL																	Zhou, Qiming/N-8735-2016	Zhou, Qiming/0000-0003-0934-0602; Hu, Zengyun/0000-0002-4259-9141													0262-6667	2150-3435				MAR 12	2022	67	4
J	Yuan, Y; Bao, AM; Jiang, P; Hamdi, R; Termonia, P; De Maeyer, P; Guo, H; Zheng, GX; Yu, T; Prishchepov, AV				Yuan, Ye; Bao, Anming; Jiang, Ping; Hamdi, Rafiq; Termonia, Piet; De Maeyer, Philippe; Guo, Hao; Zheng, Guoxiong; Yu, Tao; Prishchepov, Alexander V.			Probabilistic assessment of vegetation vulnerability to drought stress in Central Asia	JOURNAL OF ENVIRONMENTAL MANAGEMENT																	Zheng, Guoxiong/AAX-3597-2021; jiang, ping/GXF-8339-2022; Prishchepov, Alexander/H-6708-2012	Zheng, Guoxiong/0000-0002-9126-8357; Prishchepov, Alexander/0000-0003-2375-1651													0301-4797	1095-8630				MAY 15	2022	310
J	Lin, SY; Wang, WQ; Sardans, J; Lan, XF; Fang, YY; Singh, BP; Xu, XP; Wiesmeier, M; Tariq, A; Zeng, FJ; Alrefaei, AF; Penuelas, J				Lin, Shaoying; Wang, Weiqi; Sardans, Jordi; Lan, Xingfu; Fang, Yunying; Singh, Bhupinder Pal; Xu, Xuping; Wiesmeier, Martin; Tariq, Akash; Zeng, Fanjiang; Alrefaei, Abdulwahed Fahad; Penuelas, Josep			Effects of slag and biochar amendments on microorganisms and fractions of soil organic carbon during flooding in a paddy field after two years in southeastern China	SCIENCE OF THE TOTAL ENVIRONMENT																	Alrefaei, Abdulwahed Fahad/AAX-7443-2021; Penuelas, Josep/D-9704-2011; Fang, Yunying/AAU-7401-2021; Singh, Bhupinder Pal/D-8670-2017	Alrefaei, Abdulwahed Fahad/0000-0002-3761-6656; Penuelas, Josep/0000-0002-7215-0150; Singh, Bhupinder Pal/0000-0003-1952-9070													0048-9697	1879-1026				JUN 10	2022	824
J	Elqars, E; Oubella, A; Byadi, S; Hachim, ME; Auhmani, A; Guennoun, M; Essadki, A; Riahi, A; Robert, A; Itto, MYA; Nbigui, T				Elqars, Esseddik; Oubella, Ali; Byadi, Said; Hachim, Mouhi Eddine; Auhmani, Aziz; Guennoun, Mohamed; Essadki, Abdelhafid; Riahi, Abdelkhalek; Robert, Anthony; Itto, My Youssef Ait; Nbigui, Taibi			Synthesis, spectroscopic characterization, and prevention of carbon steel corrosion in hydrochloric acid of a new bis-isoxazoline-carvone	JOURNAL OF MOLECULAR STRUCTURE																		HACHIM, Mouhi Eddine/0000-0001-7692-5323; ESSEDDIK, ELQARS/0000-0002-3368-9487; AIT ITTO, Moulay Youssef/0000-0003-1876-7544													0022-2860	1872-8014				MAY 15	2022	1256
J	Ma, SY; Jemai, Z; Bai, QG				Ma, Shouyu; Jemai, Zied; Bai, Qingguo			Optimal pricing and ordering decisions for a retailer using multiple discounts	EUROPEAN JOURNAL OF OPERATIONAL RESEARCH																		ma, shouyu/0000-0003-3055-0401; Bai, Qingguo/0000-0001-6812-0293													0377-2217	1872-6860				JUN 16	2022	299	3
J	Hannah, S; Deepa, AJ; Chooralil, VS; BrillySangeetha, S; Yuvaraj, N; Raja, RA; Suresh, C; Vignesh, R; YasirAbdullahR; Srihari, K; Alene, A				Hannah, S.; Deepa, A. J.; Chooralil, Varghese S.; BrillySangeetha, S.; Yuvaraj, N.; Arshath Raja, R.; Suresh, C.; Vignesh, Rahul; YasirAbdullahR; Srihari, K.; Alene, Assefa			Blockchain-Based Deep Learning to Process IoT Data Acquisition in Cognitive Data	BIOMED RESEARCH INTERNATIONAL																		k, srihari/0000-0002-8210-1491; Raja R, Arshath/0000-0003-4750-4559													2314-6133	2314-6141				FEB 11	2022	2022
J	Wang, C; Zhao, WZ; Zhang, YY				Wang, Chuan; Zhao, Wenzhi; Zhang, Yongyong			Runoff controls the development of eco-hydrological and economic conditions in an arid oasis of the downstream inland river basin	ARID LAND RESEARCH AND MANAGEMENT																		Zhang, Yongyong/0000-0002-2084-5647; wang, chuan/0000-0003-0960-855X													1532-4982	1532-4990				JUL 3	2022	36	3
J	Govindan, R; Chackaravarthi, G; Ramachandran, G; Chelliah, CK; Muthuchamy, M; Quero, F; Mothana, RA; Noman, OM; Siddiqui, NA; Li, WJ				Govindan, Rajivgandhi; Chackaravarthi, Gnanasekaran; Ramachandran, Govindan; Chelliah, Chenthis Kanisha; Muthuchamy, Maruthupandy; Quero, Franck; Mothana, Ramzi A.; Noman, Omar M.; Siddiqui, Nasir A.; Li, Wen-Jun			Effective removal of biofilm formation in Acinetobacter baumannii using chitosan nanoparticles loaded plant essential oils	JOURNAL OF KING SAUD UNIVERSITY SCIENCE																	Govindan, Rajivgandhi/ABG-5120-2021	Govindan, Rajivgandhi/0000-0003-4907-8100													1018-3647	2213-686X				APR	2022	34	3
J	Haig, DW; Dillinger, A; Playford, G; Riera, R; Sadekov, A; Skrzypek, G; Hakansson, E; Mory, AJ; Peyrot, D; Thomas, C				Haig, David W.; Dillinger, Antoine; Playford, Geoffrey; Riera, Rosine; Sadekov, Aleksey; Skrzypek, Grzegorz; Hakansson, Eckart; Mory, Arthur J.; Peyrot, Daniel; Thomas, Charmaine			Methane seeps following Early Permian (Sakmarian) deglaciation, interior East Gondwana, Western Australia: Multiphase carbonate cements, distinct carbon-isotope signatures, extraordinary biota	PALAEOGEOGRAPHY PALAEOCLIMATOLOGY PALAEOECOLOGY																	Mory, Arthur/HJH-8488-2023	Mory, Arthur/0000-0003-3541-6172; peyrot, Daniel/0000-0002-3897-6733; Skrzypek, Grzegorz/0000-0002-5686-2393													0031-0182	1872-616X				APR 1	2022	591
J	Liu, GZ; Yang, YS; Liu, WM; Guo, XX; Xie, RZ; Ming, B; Xue, J; Zhang, GQ; Li, RF; Wang, KR; Hou, P; Li, SK				Liu, Guangzhou; Yang, Yunshan; Liu, Wanmao; Guo, Xiaoxia; Xie, Ruizhi; Ming, Bo; Xue, Jun; Zhang, Guoqiang; Li, Rongfa; Wang, Keru; Hou, Peng; Li, Shaokun			Optimized canopy structure improves maize grain yield and resource use efficiency	FOOD AND ENERGY SECURITY																	Ming, Bo/ABF-5354-2021; ming, bo/AGG-3276-2022; Yang, Yunshan/GLN-3735-2022	Ming, Bo/0000-0002-5384-8617; ming, bo/0000-0002-5384-8617; Yang, Yunshan/0000-0002-8148-3459													2048-3694					MAY	2022	11	2
J	Ortega, MV; Kim, Y; Leung, K; Weinstein, M; Leftwich, HK				Ortega, Marcus, V; Kim, Youngwu; Leung, Katherine; Weinstein, Milena; Leftwich, Heidi K.			Can sonographic fetal head circumference measurement help predict obstetric anal sphincter injury?	INTERNATIONAL JOURNAL OF GYNECOLOGY & OBSTETRICS																															0020-7292	1879-3479				OCT	2022	159	1
J	Hinman, NW; Hofmann, MH; Warren-Rhodes, K; Phillips, MS; Noffke, N; Cabrol, NA; Diaz, GC; Demergasso, C; Tebes-Cayo, C; Cabestrero, O; Bishop, JL; Gulick, VC; Summers, D; Sobron, P; McInenly, M; Moersch, J; Rodriguez, C; Sarazzin, P; Rhodes, KL; Contreras, CJR; Wettergreen, D; Parro, V				Hinman, Nancy W.; Hofmann, Michael H.; Warren-Rhodes, Kimberly; Phillips, Michael S.; Noffke, Nora; Cabrol, Nathalie A.; Chong Diaz, Guillermo; Demergasso, Cecilia; Tebes-Cayo, Cinthya; Cabestrero, Oscar; Bishop, Janice L.; Gulick, Virginia C.; Summers, David; Sobron, Pablo; McInenly, Michael; Moersch, Jeffrey; Rodriguez, Constanza; Sarazzin, Philippe; Rhodes, Kevin L.; Riffo Contreras, Camila Ja…			Surface Morphologies in a Mars-Analog Ca-Sulfate Salar, High Andes, Northern Chile	FRONTIERS IN ASTRONOMY AND SPACE SCIENCES																	Cabestrero, Óscar/CAH-1526-2022; Demergasso, Cecilia/A-7392-2013; Cabestrero, Óscar/I-1414-2015	Demergasso, Cecilia/0000-0003-4563-3066; Cabestrero, Óscar/0000-0002-0338-1502; Phillips, Michael Steven/0000-0001-8873-2238													2296-987X					FEB 7	2022	8
J	Bergner, JB; Shirley, YL; Jorgensen, JK; McGuire, B; Aalto, S; Anderson, CM; Chin, G; Gerin, M; Hartogh, P; Kim, D; Leisawitz, D; Najita, J; Schwarz, KR; Tielens, AGGM; Walker, CK; Wilner, DJ; Wollack, EJ				Bergner, Jennifer B.; Shirley, Yancy L.; Jorgensen, Jes K.; McGuire, Brett; Aalto, Susanne; Anderson, Carrie M.; Chin, Gordon; Gerin, Maryvonne; Hartogh, Paul; Kim, Daewook; Leisawitz, David; Najita, Joan; Schwarz, Kamber R.; Tielens, Alexander G. G. M.; Walker, Christopher K.; Wilner, David J.; Wollack, Edward J.			Astrochemistry With the Orbiting Astronomical Satellite for Investigating Stellar Systems	FRONTIERS IN ASTRONOMY AND SPACE SCIENCES																	Wollack, Edward J/D-4467-2012; Jorgensen, Jes Kristian/L-7936-2014	Wollack, Edward J/0000-0002-7567-4451; Jorgensen, Jes Kristian/0000-0001-9133-8047													2296-987X					FEB 2	2022	8
J	Akhigbe, RE; Oladipo, AA; Oyedokun, PA; Hamed, MA; Okeleji, LO; Ajayi, AF				Akhigbe, R. E.; Oladipo, A. A.; Oyedokun, P. A.; Hamed, M. A.; Okeleji, L. O.; Ajayi, A. F.			Upregulation of Uric Acid Production and Caspase 3 Signalling Mediates Rohypnol-Induced Cardiorenal Damage	CARDIOVASCULAR TOXICOLOGY																	; Hamed, Moses/CAH-6613-2022	Akhigbe, Roland/0000-0002-3874-5927; Hamed, Moses/0000-0003-3378-6794; Oyedokun, Precious Adeoye/0000-0003-0659-1086; Ajayi, Ayodeji/0000-0002-0992-1653													1530-7905	1559-0259				MAY	2022	22	5
J	Glasner, S; Patrick, K; Ybarra, M; Reback, CJ; Ang, A; Kalichman, S; Bachrach, K; Garneau, HC; Venegas, A; Rawson, RA				Glasner, Suzette; Patrick, Kevin; Ybarra, Michele; Reback, Cathy J.; Ang, Alfonso; Kalichman, Seth; Bachrach, Ken; Garneau, Helene Chokron; Venegas, Alexandra; Rawson, Richard A.			Promising outcomes from a cognitive behavioral therapy text-messaging intervention targeting drug use, antiretroviral therapy adherence, and HIV risk behaviors among adults living with HIV and substance use disorders	DRUG AND ALCOHOL DEPENDENCE																															0376-8716	1879-0046				FEB 1	2022	231
J	Gulakhmadov, A; Asanova, S; Asanova, D; Safaraliev, M; Tavlintsev, A; Lyukhanov, E; Semenenko, S; Odinaev, I				Gulakhmadov, Aminjon; Asanova, Salima; Asanova, Damira; Safaraliev, Murodbek; Tavlintsev, Alexander; Lyukhanov, Egor; Semenenko, Sergey; Odinaev, Ismoil			Power Flows and Losses Calculation in Radial Networks by Representing the Network Topology in the Hierarchical Structure Form	ENERGIES																	Safaraliev, Murodbek/AAG-6805-2019; Odinaev, Ismoil/HKV-9911-2023; Tavlintsev, Alexander/E-8566-2014	Safaraliev, Murodbek/0000-0003-3433-9742; Odinaev, Ismoil/0000-0003-2434-1929; Tavlintsev, Alexander/0000-0003-0592-845X; Lyukhanov, Egor/0000-0002-4577-593X; Gulakhmadov, Aminjon/0000-0002-2366-2491														1996-1073				FEB	2022	15	3
J	Harkat, H; Bousba, R; Benincasa, C; Atrouz, K; Gueltekin-oezgueven, M; Altuntas, U; Demircan, E; Zahran, HA; Oezcelik, B				Harkat, Hamza; Bousba, Ratiba; Benincasa, Cinzia; Atrouz, Kamel; Gueltekin-oezgueven, Mine; Altuntas, Uemit; Demircan, Evren; Zahran, Hamdy A.; oezcelik, Beraat			Assessment of Biochemical Composition and Antioxidant Properties of Algerian Date Palm (Phoenix dactylifera L.) Seed Oil	PLANTS-BASEL																	Zahran, Hamdy/N-4032-2018; Demircan, Evren/ABH-1915-2020; Ozcelik, Beraat/E-8446-2010	Zahran, Hamdy/0000-0003-2500-8378; Demircan, Evren/0000-0001-8533-6037; Gultekin-Ozguven, Mine/0000-0002-2073-8075; Ozcelik, Beraat/0000-0002-1810-8154; Harkat, Hamza/0000-0002-0830-6683; atrouz, kamel/0000-0003-1311-8043														2223-7747				FEB	2022	11	3
J	Huang, Y; Xiao, CD; Su, B				Huang, Yi; Xiao, Cun-De; Su, Bo			Importance and vulnerability of water towers across Northwest China	ADVANCES IN CLIMATE CHANGE RESEARCH																		Su, Bo/0000-0003-1499-2728													1674-9278					FEB	2022	13	1
J	Kadri, K; Elsafy, M; Makhlouf, S; Awad, MA				Kadri, Karim; Elsafy, Mohammed; Makhlouf, Souhayla; Awad, Mohamed A.			Effect of pollination time, the hour of daytime, pollen storage temperature and duration on pollen viability, germinability, and fruit set of date palm (Phoenix dactylifera L.) cv Deglet Nour	SAUDI JOURNAL OF BIOLOGICAL SCIENCES																	karim, kadri/T-1562-2019; Karim, KADRI/AAX-1072-2020; Awad, Mohamed/I-7597-2012	karim, kadri/0000-0003-2258-6068; Karim, KADRI/0000-0003-2258-6068; Awad, Mohamed/0000-0002-4121-0747													1319-562X	2213-7106				FEB	2022	29	2
J	Khaldi, Z; Nafti, M; Jilani, MT				Khaldi, Zahran; Nafti, Mounir; Jilani, Mohamed Tabarek			Small ruminants milk from Tunisian oasis: physicochemical characteristics, mineral contents, and microbiological quality	TROPICAL ANIMAL HEALTH AND PRODUCTION																		zahran, khaldi/0000-0001-5368-8513													0049-4747	1573-7438				FEB	2022	54	1
J	Liu, W; Ma, L; Smanov, Z; Samarkhanov, K; Abuduwaili, J				Liu, Wen; Ma, Long; Smanov, Zhassulan; Samarkhanov, Kanat; Abuduwaili, Jilili			Clarifying Soil Texture and Salinity Using Local Spatial Statistics (Getis-Ord Gi* and Moran's I) in Kazakh-Uzbekistan Border Area, Central Asia	AGRONOMY-BASEL																	; Samarkhanov, Kanat/S-2590-2017	Liu, Wen/0000-0002-5524-0496; Samarkhanov, Kanat/0000-0001-9799-8695; ji, li li/0000-0001-8483-1554; Smanov, Zhassulan/0000-0002-8182-3978; Ma, Long/0000-0002-8233-8640														2073-4395				FEB	2022	12	2
J	Martens, FMJ; De Wachter, S; Van Breda, J; Witte, LPW; Brits, T; Smits, MAC; Padron, O; Sutherland, S; Toozs-Hobson, P; Digesu, AG; Cline, KJ; Dmochowski, R; Heesakkers, JPFA				Martens, F. M. J.; De Wachter, S.; Van Breda, J.; Witte, L. P. W.; Brits, T.; Smits, M. A. C.; Padron, O.; Sutherland, S.; Toozs-Hobson, P.; Digesu, A. G.; Cline, K. J.; Dmochowski, R.; Heesakkers, J. P. F. A.			OASIS pivotal trial to evaluate the safety and efficacy of the RENOVA iStim System (TM) for the treatment of women with overactive bladder	EUROPEAN UROLOGY																	Heesakkers, John/GWC-4991-2022														0302-2838	1873-7560				FEB	2022	81
J	Meyer, J; Fry, C; Turner, A; Razavi, H				Meyer, Joos; Fry, Carly; Turner, Angus; Razavi, Hessom			Intravitreal dexamethasone versus bevacizumab in Aboriginal and Torres Strait Islander patients with diabetic macular oedema, the OASIS study (a randomised control trial)	CLINICAL AND EXPERIMENTAL OPHTHALMOLOGY																		, Joos/0000-0002-8357-4178													1442-6404	1442-9071				FEB	2022	49	8
J	Mohammed, M; El Mahmoudi, A; Almolhem, Y				Mohammed, Maged; El Mahmoudi, Ahmed; Almolhem, Yousef			Applications of Electromagnetic Induction and Electrical Resistivity Tomography for Digital Monitoring and Assessment of the Soil: A Case Study of Al-Ahsa Oasis, Saudi Arabia	APPLIED SCIENCES-BASEL																	mohamed, Maged/AAL-1376-2021; Mohammed, Maged/Q-2131-2016	mohamed, Maged/0000-0003-3860-1306; Mohammed, Maged/0000-0003-3860-1306														2076-3417				FEB	2022	12	4
J	Olatunji, OA; Pan, KW; Tariq, A; Okunlola, GO; Wang, D; Raimi, IO; Zhang, L				Olatunji, Olusanya Abiodun; Pan, Kaiwen; Tariq, Akash; Okunlola, Gideon Olarewaju; Wang, Dong; Raimi, Idris Olawale; Zhang, Lin			Planting Systems Affect Soil Microbial Communities and Enzymes Activities Differentially under Drought and Phosphorus Addition	PLANTS-BASEL																	Olatunji, Olusanya Abiodun/AAT-2492-2020	Raimi, Idris Olawale/0000-0003-4046-0952; Tariq, Akash/0000-0002-5382-9336; OLATUNJI, Olusanya Abiodun/0000-0002-4334-9021; Pan, Kaiwen/0000-0003-1770-8219														2223-7747				FEB	2022	11	3
J	Rajivgandhi, GN; Chackaravarthi, G; Ramachandran, G; Chelliah, CK; Maruthupandy, M; Alharbi, MS; Alharbi, NS; Khaled, JM; Li, WJ				Rajivgandhi, Govindan Nadar; Chackaravarthi, Gnansekaran; Ramachandran, Govindan; Chelliah, Chenthis Kanisha; Maruthupandy, Muthuchamy; Alharbi, Mohammed S.; Alharbi, Naiyf S.; Khaled, Jamal M.; Li, Wen-Jun			Morphological damage and increased ROS production of biosynthesized silver nanoparticle against MCF-7 breast cancer cells through in vitro approaches	JOURNAL OF KING SAUD UNIVERSITY SCIENCE																	Khaled, Jamal Mohammed Ali/D-8188-2017	Khaled, Jamal Mohammed Ali/0000-0003-2442-0790													1018-3647	2213-686X				FEB	2022	34	2
J	Rajivgandhi, GN; Chackaravarthi, G; Ramachandran, G; Manoharan, N; Ragunathan, R; Siddiqi, MZ; Alharbi, NS; Khaled, JM; Li, WJ				Rajivgandhi, Govindan Nadar; Chackaravarthi, Gnanasekaran; Ramachandran, Govindan; Manoharan, Natesan; Ragunathan, R.; Siddiqi, Muhammad Zubair; Alharbi, Naiyf S.; Khaled, Jamal M.; Li, Wen-Jun			Synthesis of silver nanoparticle (Ag NPs) using phytochemical rich medicinal plant Lonicera japonica for improve the cytotoxicity effect in cancer cells	JOURNAL OF KING SAUD UNIVERSITY SCIENCE																	Khaled, Jamal Mohammed Ali/D-8188-2017	Khaled, Jamal Mohammed Ali/0000-0003-2442-0790													1018-3647	2213-686X				FEB	2022	34	2
J	Sang, M; Xiao, WJ; Windley, BF; Mao, QG; Zhang, ZY; Wang, H; Yang, H; Ao, SJ; Song, DF; Gan, JM; Zhang, ZX; Li, L				Sang, Miao; Xiao, Wenjiao; Windley, Brian F.; Mao, Qigui; Zhang, Zhiyong; Wang, Hao; Yang, He; Ao, Songjian; Song, Dongfang; Gan, Jingmin; Zhang, Zhixin; Li, Liang			From Middle Neoproterozoic Extension to Paleozoic Accretion and Collision of the Eastern Tiklik Belt (the Western Kunlun Orogen, NW China)	MINERALS																	Xiao (肖文交), Wenjiao/GPT-2503-2022; Ao, Songjian/M-1710-2017; Xiao, Wenjiao/A-2762-2010; Ao, Songjian/R-1949-2019; Yang, He/I-7844-2017	Ao, Songjian/0000-0003-0118-6997; Ao, Songjian/0000-0003-0118-6997; Yang, He/0000-0002-4666-8896; Xiao (xiao wen jiao), Wenjiao/0000-0003-3518-0526														2075-163X				FEB	2022	12	2
J	Santos, AA; Nel, A; Rodriguez-Barreiro, I; Sender, LM; Wappler, T; Diez, JB				Santos, Artai A.; Nel, Andre; Rodriguez-Barreiro, Ivan; Sender, Luis M.; Wappler, Torsten; Diez, Jose B.			Insect and Plant Diversity in Hot-Spring Ecosystems during the Jurassic-Cretaceous Boundary from Spain (Aguilar Fm., Palencia)	BIOLOGY-BASEL																	Diez, José B./L-1004-2014; Sender, Luis Miguel/HJB-3337-2022; Wappler, Torsten/D-4287-2011	Diez, José B./0000-0001-5739-7270; Sender, Luis Miguel/0000-0002-7279-049X; Santos Lopez, Artai Anton/0000-0002-2399-8825; Wappler, Torsten/0000-0003-1592-0988; Nel, Andre/0000-0002-4241-7651; Rodriguez Barreiro, Ivan/0000-0002-0938-662X														2079-7737				FEB	2022	11	2
J	Siddiqui, JA; Zhang, YP; Luo, YY; Bamisile, BS; Rehman, NU; Islam, W; Qasim, M; Jiang, QY; Xu, YJ				Siddiqui, Junaid Ali; Zhang, Yuping; Luo, Yuanyuan; Bamisile, Bamisope Steve; Rehman, Naveed Ur; Islam, Waqar; Qasim, Muhammad; Jiang, Qiuying; Xu, Yijuan			Comprehensive Detoxification Mechanism Assessment of Red Imported Fire Ant (Solenopsis invicta) against Indoxacarb	MOLECULES																	Siddiqui, Junaid Ali/G-4054-2011; islam, waqar/M-8869-2019	Siddiqui, Junaid Ali/0000-0001-6626-2626; islam, waqar/0000-0002-2383-402X; BAMISILE, BAMISOPE/0000-0001-5163-3631														1420-3049				FEB	2022	27	3
J	Ullah, A; Sadaf, S; Ullah, S; Alshaya, H; Okla, MK; Alwasel, YA; Tariq, A				Ullah, Abd; Sadaf, Sadaf; Ullah, Sami; Alshaya, Huda; Okla, Mohammad K.; Alwasel, Yasmeen A.; Tariq, Akash			Using Halothermal Time Model to Describe Barley (Hordeumvulgare L.) Seed Germination Response to Water Potential and Temperature	LIFE-BASEL																	OKLA, MOHAMMED/GWC-0601-2022	Tariq, Akash/0000-0002-5382-9336; Alwasel, Yasmeen/0000-0002-3947-0259														2075-1729				FEB	2022	12	2
J	Wan, YB; Shi, QD; Dai, Y; Marhaba, N; Peng, LP; Peng, L; Shi, HB				Wan, Yanbo; Shi, Qingdong; Dai, Yue; Marhaba, Nijat; Peng, Liping; Peng, Lei; Shi, Haobo			Water Use Characteristics of Populus euphratica Oliv. and Tamarix chinensis Lour. at Different Growth Stages in a Desert Oasis	FORESTS																																1999-4907				FEB	2022	13	2
J	Wang, WR; Chen, YP; Wang, WH; Yang, YH; Hou, YF; Zhang, S; Zhu, ZY				Wang, Wanrui; Chen, Yapeng; Wang, Weihua; Yang, Yuhai; Hou, Yifeng; Zhang, Shuai; Zhu, Ziyang			Assessing the Influences of Land Use Change on Groundwater Hydrochemistry in an Oasis-Desert Region of Central Asia	WATER																		Wang, Weihua/0000-0003-2643-2971														2073-4441				FEB	2022	14	4
J	Wei, QY; Nurmemet, I; Gao, MH; Xie, BQ				Wei, Qinyu; Nurmemet, Ilyas; Gao, Minhua; Xie, Boqiang			Inversion of Soil Salinity Using Multisource Remote Sensing Data and Particle Swarm Machine Learning Models in Keriya Oasis, Northwestern China	REMOTE SENSING																																2072-4292				FEB	2022	14	3
J	Wu, SP; Gao, X; Lei, JQ; Zhou, N; Guo, ZK; Shang, BJ				Wu Shupu; Gao Xin; Lei Jiaqiang; Zhou Na; Guo Zengkun; Shang Baijun			Ecological environment quality evaluation of the Sahel region in Africa based on remote sensing ecological index	JOURNAL OF ARID LAND																															1674-6767	2194-7783				JAN	2022	14	1
J	Zahuranec, DB; Zhang, GH; Shi, X; Lank, RJ; Ortiz, C; Case, E; Morgenstern, LB				Zahuranec, Darin B.; Zhang, Guanghao; Shi, Xu; Lank, Rebecca J.; Ortiz, Carmen; Case, Erin; Morgenstern, Lewis B.			Physician Quality Of Communication And Shared Decision Making After Stroke In A Bi-ethnic Community: The Oasis Project	STROKE					American-Stroke-Association International Stroke Conference / State-of-the-Science Stroke Nursing Symposium	FEB 08-11, 2022	ELECTR NETWORK	Amer Stroke Assoc																							0039-2499	1524-4628				FEB	2022	53
J	Wang, WC; Pang, JY; Zhang, FH; Sun, LP; Yang, L; Fu, TD; Guo, L; Siddique, KHM				Wang, Weichao; Pang, Jiayin; Zhang, Fenghua; Sun, Lupeng; Yang, Lei; Fu, Tingdong; Guo, Liang; Siddique, Kadambot H. M.			Salt-responsive transcriptome analysis of canola roots reveals candidate genes involved in the key metabolic pathway in response to salt stress	SCIENTIFIC REPORTS																	Wang, Weichao/AAE-5178-2022; Guo, Liang/AAW-4739-2021; Siddique, Kadambot H.M./B-3462-2011	Wang, Weichao/0000-0003-2761-6561; Guo, Liang/0000-0001-7191-5062; Siddique, Kadambot H.M./0000-0001-6097-4235; Pang, Jiayin/0000-0002-8127-645X													2045-2322					JAN 31	2022	12	1
J	El Hantati, I; Adri, A; Fakhreddine, H; Rifai, S; Benamar, R				El Hantati, Issam; Adri, Ahmed; Fakhreddine, Hatim; Rifai, Said; Benamar, Rhali			Multimode Analysis of Geometrically Nonlinear Transverse Free and Forced Vibrations of Tapered Beams	SHOCK AND VIBRATION																	; FAKHREDDINE, Hatim/R-2966-2018	ADRI, Ahmed/0000-0003-1355-5059; FAKHREDDINE, Hatim/0000-0001-8930-7444; EL HANTATI, ISSAM/0000-0001-7151-3936													1070-9622	1875-9203				JAN 30	2022	2022
J	Zhou, YQ; Duan, WL; Chen, YN; Yi, JH; Wang, B; Di, YF; He, C				Zhou, Yiqi; Duan, Weili; Chen, Yaning; Yi, Jiahui; Wang, Bin; Di, Yanfeng; He, Chao			Exposure Risk of Global Surface O-3 During the Boreal Spring Season	EXPOSURE AND HEALTH																	DUAN, Weili/A-1928-2019	DUAN, Weili/0000-0002-1503-8066													2451-9766	2451-9685				JUN	2022	14	2
J	Zidi, S; Ben Soussia, T; Hamani, N; Benaissa, M; Kermad, L				Zidi, Slim; Ben Soussia, Tayssir; Hamani, Nadia; Benaissa, Mounir; Kermad, Lyes			A new approach for business process reconfiguration under uncertainty using Dempster-Shafer Theory	INTERNATIONAL JOURNAL OF SYSTEMS SCIENCE-OPERATIONS & LOGISTICS																	Hamani, Nadia/AAR-9749-2020	Hamani, Nadia/0000-0001-6151-2585; ZIDI, Slim/0000-0002-6552-5989; , Lyes/0000-0002-8302-3720													2330-2674	2330-2682
J	Estrade, A; De Pablo, GS; Zanotti, A; Wood, S; Fisher, HL; Fusar-Poli, P				Estrade, Andres; de Pablo, Gonzalo Salazar; Zanotti, Alice; Wood, Scott; Fisher, Helen L.; Fusar-Poli, Paolo			Public health primary prevention implemented by clinical high-risk services for psychosis	TRANSLATIONAL PSYCHIATRY																	; Fusar-Poli, Paolo/D-8605-2011; Fisher, Helen/A-7178-2010	Salazar de Pablo, Gonzalo/0000-0002-6992-0767; Fusar-Poli, Paolo/0000-0003-3582-6788; Fisher, Helen/0000-0003-4174-2126													2158-3188					JAN 28	2022	12	1
J	Klimley, AP; Ketchum, JT; Lara-Lizardi, F; Papastamatiou, YP; Hoyos-Padilla, EM				Klimley, A. Peter; Ketchum, James T.; Lara-Lizardi, Frida; Papastamatiou, Yannis P.; Hoyos-Padilla, E. Mauricio			Evidence for spatial and temporal resource partitioning of sharks at Roca Partida, an isolated pinnacle in the eastern Pacific	ENVIRONMENTAL BIOLOGY OF FISHES																		Hoyos, Edgar/0000-0002-4318-2655													0378-1909	1573-5133				DEC	2022	105	12
J	Gehring, J; Vignon, E; Billault-Roux, AC; Ferrone, A; Protat, A; Alexander, SP; Berne, A				Gehring, Josue; Vignon, Etienne; Billault-Roux, Anne-Claire; Ferrone, Alfonso; Protat, Alain; Alexander, Simon P.; Berne, Alexis			Orographic Flow Influence on Precipitation During an Atmospheric River Event at Davis, Antarctica	JOURNAL OF GEOPHYSICAL RESEARCH-ATMOSPHERES																		Ferrone, Alfonso/0000-0003-1441-7184; Billault-Roux, Anne-Claire/0000-0003-3673-8683; Alexander, Simon/0000-0001-6823-8857; Berne, Alexis/0000-0003-4977-1204; Gehring, Josue/0000-0001-8485-7973; VIGNON, Etienne/0000-0003-3801-9367													2169-897X	2169-8996				JAN 27	2022	127	2
J	Lei, ZY; Liu, F; Wright, IJ; Carriqui, M; Niinemets, U; Han, JM; Jia, MM; Atwell, BJ; Cai, XY; Zhang, WF; Zhou, ZL; Zhang, YL				Lei, Zhangying; Liu, Fang; Wright, Ian J.; Carriqui, Marc; Niinemets, Ulo; Han, Jimei; Jia, Mengmeng; Atwell, Brian J.; Cai, Xiaoyan; Zhang, Wangfeng; Zhou, Zhongli; Zhang, Yali			Comparisons of photosynthetic and anatomical traits between wild and domesticated cotton	JOURNAL OF EXPERIMENTAL BOTANY																	Han, Jimei/GQH-6352-2022; Niinemets, Ülo/A-3816-2008; MAGWANGA, RICHARD/Y-2772-2018; Carriquí, Marc/I-5544-2014; Wright, Ian/G-4979-2012	Niinemets, Ülo/0000-0002-3078-2192; MAGWANGA, RICHARD/0000-0002-1900-5798; Carriquí, Marc/0000-0002-0153-2602; Atwell, Brian/0000-0002-0466-1688; Wright, Ian/0000-0001-8338-9143													0022-0957	1460-2431				JAN 27	2022	73	3
J	Wang, WC; Zhang, FH; Sun, LP; Yang, L; Yang, Y; Wang, YJ; Siddique, KHM; Pang, JY				Wang, Weichao; Zhang, Fenghua; Sun, Lupeng; Yang, Lei; Yang, Yang; Wang, Yajuan; Siddique, Kadambot H. M.; Pang, Jiayin			Alkaline Salt Inhibits Seed Germination and Seedling Growth of Canola More Than Neutral Salt	FRONTIERS IN PLANT SCIENCE																	Wang, Weichao/AAE-5178-2022; Siddique, Kadambot H.M./B-3462-2011	Wang, Weichao/0000-0003-2761-6561; Siddique, Kadambot H.M./0000-0001-6097-4235; Pang, Jiayin/0000-0002-8127-645X													1664-462X					JAN 27	2022	13
J	Alary, V; Caulfield, ME; Amsidder, L; Juanes, X; Boujenane, I; Srairi, TM; Sam, A; Hammond, J; Van Wijk, M				Alary, Veronique; Caulfield, Mark E.; Amsidder, Lina; Juanes, Xavier; Boujenane, Ismail; Srairi, Taher M.; Sam, Adams; Hammond, James; Van Wijk, Mark			Heterogeneity of Resilience of Livelihood Strategies in Pastoral and Agropastoral Farming Systems of Rural Semi-arid to Arid Areas in Morocco	FRONTIERS IN SUSTAINABLE FOOD SYSTEMS																		Srairi, Mohamed Taher/0000-0002-8465-4268; Caulfield, Mark E./0000-0002-5319-9215														2571-581X				JAN 25	2022	5
J	Asibi, AE; Yin, W; Hu, FL; Fan, ZL; Gou, ZW; Yang, HW; Guo, Y; Chai, Q				Asibi, Aziiba Emmanuel; Yin, Wen; Hu, Falong; Fan, Zhilong; Gou, Zhiwen; Yang, Hongwei; Guo, Yao; Chai, Qiang			Optimized nitrogen rate, plant density, and irrigation level reduced ammonia emission and nitrate leaching on maize farmland in the oasis area of China	PEERJ																		Aziiba, Emmanuel Asibi/0000-0002-1129-6711													2167-8359					JAN 19	2022	10
J	de Pablo, GS; Soardo, L; Cabras, A; Pereira, J; Kaur, S; Besana, F; Arienti, V; Coronelli, F; Il Shin, J; Solmi, M; Petros, N; Carvalho, AF; McGuire, P; Fusar-Poli, P				de Pablo, Gonzalo Salazar; Soardo, Livia; Cabras, Anna; Pereira, Joana; Kaur, Simi; Besana, Filippo; Arienti, Vincenzo; Coronelli, Francesco; Il Shin, Jae; Solmi, Marco; Petros, Natalia; Carvalho, Andre F.; McGuire, Philip; Fusar-Poli, Paolo			Clinical outcomes in individuals at clinical high risk of psychosis who do not transition to psychosis: a meta-analysis	EPIDEMIOLOGY AND PSYCHIATRIC SCIENCES																	Solmi, Marco/K-3906-2018; Fusar-Poli, Paolo/D-8605-2011	Solmi, Marco/0000-0003-4877-7233; Fusar-Poli, Paolo/0000-0003-3582-6788; Salazar de Pablo, Gonzalo/0000-0002-6992-0767; McGuire, Philip/0000-0003-4381-0532; Petros, Natalia/0000-0002-0802-0941													2045-7960	2045-7979				JAN 19	2022	31
J	Fortea, L; Albajes-Eizagirre, A; Yao, YW; Soler, E; Verdolini, N; Hauson, AO; Fortea, A; Madero, S; Solanes, A; Wollman, SC; Serra-Blasco, M; Wise, T; Lukito, S; Pico-Perez, M; Carlisi, C; Zhang, JT; Pan, PL; Farre-Colomes, A; Arnone, D; Kempton, MJ; Soriano-Mas, C; Rubia, K; Norman, L; Fusar-Poli, P; Mataix-Cols, D; Valenti, M; Via, E; Cardoner, N; Solmi, M; Shin, JI; Vieta, E; Radua, J				Fortea, Lydia; Albajes-Eizagirre, Anton; Yao, Yuan-Wei; Soler, Edu; Verdolini, Norma; Hauson, Alexander O.; Fortea, Adriana; Madero, Santiago; Solanes, Aleix; Wollman, Scott C.; Serra-Blasco, Maria; Wise, Toby; Lukito, Steve; Pico-Perez, Maria; Carlisi, Christina; Zhang, JinTao; Pan, PingLei; Farre-Colomes, Alvar; Arnone, Danilo; Kempton, Matthew J.; Soriano-Mas, Carles; Rubia, Katya; Norman, Luk…			Focusing on Comorbidity-A Novel Meta-Analytic Approach and Protocol to Disentangle the Specific Neuroanatomy of Co-occurring Mental Disorders	FRONTIERS IN PSYCHIATRY																	Radua, Joaquim/H-6424-2019; Solanes, Aleix/HGB-1640-2022; Yao, Yuan-Wei/J-7368-2019; Picó-Pérez, Maria/AAE-1174-2020; Solmi, Marco/K-3906-2018; SHIN, JAE IL/J-6922-2017; VIA, ESTHER/A-4503-2017	Radua, Joaquim/0000-0003-1240-5438; Solanes, Aleix/0000-0002-2491-200X; Yao, Yuan-Wei/0000-0002-9635-7826; Picó-Pérez, Maria/0000-0002-1573-2445; Solmi, Marco/0000-0003-4877-7233; SHIN, JAE IL/0000-0003-2326-1820; Fortea, Adriana/0000-0003-3681-0841; VIA, ESTHER/0000-0002-2331-3232; Kempton, Matthew/0000-0003-3541-9947; Hauson, Alexander/0000-0003-0596-6085													1664-0640					JAN 18	2022	12
J	Schultz, CJ; Wu, Y; Baumann, U				Schultz, Carolyn J.; Wu, Yue; Baumann, Ute			A targeted bioinformatics approach identifies highly variable cell surface proteins that are unique to Glomeromycotina	MYCORRHIZA																															0940-6360	1432-1890				JAN	2022	32	1
J	Hamza, F; Kahli, A; Almalki, M; Chokri, MA				Hamza, Foued; Kahli, Asma; Almalki, Mohammed; Chokri, Mohamed-Ali			Distance from industrial complex, urban area cover, and habitat structure combine to predict richness of breeding birds in southeastern Tunisian oases	ENVIRONMENTAL SCIENCE AND POLLUTION RESEARCH																		Hamza, Foued/0000-0002-7577-4487													0944-1344	1614-7499				MAY	2022	29	22
J	Ge, P; Yang, M; Bouchard, JL; Dzamko, N; Lewis, SJG; Halliday, GM; Doran, TM				Ge, Peng; Yang, Mu; Bouchard, Jacob L.; Dzamko, Nicolas; Lewis, Simon J. G.; Halliday, Glenda M.; Doran, Todd M.			Chemoselective Bioconjugation of Amyloidogenic Protein Antigens to PEGylated Microspheres Enables Detection of alpha-Synuclein Autoantibodies in Human Plasma	BIOCONJUGATE CHEMISTRY																	Halliday, Glenda M/E-8555-2011; Dzamko, Nicolas/AAD-6922-2019; Yang, Mu/X-5584-2018	Halliday, Glenda M/0000-0003-0422-8398; Yang, Mu/0000-0002-3041-8235; Ge, Peng/0000-0002-2289-5373													1043-1802	1520-4812				FEB 16	2022	33	2
J	Pinapatruni, R; Bindu, CS				Pinapatruni, Rohini; Bindu, Chigarapalle Shoba			Adversarial image reconstruction learning framework for medical image retrieval	SIGNAL IMAGE AND VIDEO PROCESSING																		C, Shoba Bindu/0000-0002-3637-507X													1863-1703	1863-1711				JUL	2022	16	5
J	Zhu, SH; Chen, X; Zhang, C; Fang, X; Cao, LZ				Zhu, Shihua; Chen, Xi; Zhang, Chi; Fang, Xia; Cao, Liangzhong			Carbon variation of dry grasslands in Central Asia in response to climate controls and grazing appropriation	ENVIRONMENTAL SCIENCE AND POLLUTION RESEARCH																		zhang, chi/0000-0003-4866-1441; Zhu, Shihua/0000-0002-3603-6203													0944-1344	1614-7499				MAY	2022	29	21
J	Ganaie, MA; Tanveer, M; Beheshti, I				Ganaie, M. A.; Tanveer, M.; Beheshti, Iman			Brain age prediction using improved twin SVR	NEURAL COMPUTING & APPLICATIONS																	Beheshti, Iman/GQZ-3345-2022; Tanveer, Mohammad/I-4585-2013	Tanveer, Mohammad/0000-0002-5727-3697													0941-0643	1433-3058
J	Liu, CJ; Zhang, F; Wang, XP; Chan, NW; Rahman, HA; Yang, ST; Tan, ML				Liu, Changjiang; Zhang, Fei; Wang, Xiaoping; Chan, Ngai Weng; Rahman, Haliza Abdul; Yang, Shengtian; Tan, Mou Leong			Assessing the factors influencing water quality using environment water quality index and partial least squares structural equation model in the Ebinur Lake Watershed, Xinjiang, China	ENVIRONMENTAL SCIENCE AND POLLUTION RESEARCH																	Tan, Mou Leong/N-4678-2017; Zhang, Fei/AAD-6047-2019; Liu, Changjiang/GVU-0201-2022	Tan, Mou Leong/0000-0003-3939-0336; Zhang, Fei/0000-0002-1194-8513;													0944-1344	1614-7499				APR	2022	29	19
J	Gabr, ME				Gabr, Mohamed Elsayed			Design methodology for sewage water treatment system comprised of Imhoff's tank and a subsurface horizontal flow constructed wetland: a case study Dakhla Oasis, Egypt	JOURNAL OF ENVIRONMENTAL SCIENCE AND HEALTH PART A-TOXIC/HAZARDOUS SUBSTANCES & ENVIRONMENTAL ENGINEERING																		Gabr, Mohamed/0000-0003-2448-601X													1093-4529	1532-4117				MAR 29	2022	57	1
J	Visser, A; Kwicklis, E; Farnham, I; Tompson, AFB; Hershey, RL				Visser, Ate; Kwicklis, Edward; Farnham, Irene; Tompson, Andrew F. B.; Hershey, Ronald L.			Using groundwater noble gas measurements to confirm paleorecharge hypotheses at Pahute Mesa, Nevada National Security Site, Nevada, USA	HYDROGEOLOGY JOURNAL																		Tompson, Andrew/0000-0001-8885-4702; Visser, Ate/0000-0003-4048-4540													1431-2174	1435-0157				FEB	2022	30	1
J	Abourriche, A; Oumam, M; Mansouri, S; Mouiya, M; Rakcho, Y; Benhammou, A; Abouliatim, Y; Alami, J; Hannache, H				Abourriche, Abdelkrim; Oumam, Mina; Mansouri, Said; Mouiya, Mossaab; Rakcho, Yassine; Benhammou, Abdelaziz; Abouliatim, Younes; Alami, Jones; Hannache, Hassan			Effect of processing conditions on the improvement of properties and recovering yield of Moroccan oil shale	OIL SHALE																		Mansouri, Said/0000-0002-2221-3440; Mouiya, Mossaab/0000-0002-2470-6433													0208-189X	1736-7492					2022	39	1
J	Aghayan, A; Jaiswal, P				Aghayan, Afshin; Jaiswal, Priyank			Noise suppression using a near-source wavelet	GEOPHYSICS																	Aghayan, Afshin/ADE-7755-2022; Aghayan, Afshin/B-6985-2017	Aghayan, Afshin/0000-0002-2606-5027; Jaiswal, Priyank/0000-0002-3094-6812													0016-8033	1942-2156				JAN-FEB	2022	87	1
J	Aljaloud, AS; Uliyan, DM; Alkhalil, A; Abd Elrhman, M; Alogali, AFM; Altameemi, YM; Altamimi, M; Kwan, P				Aljaloud, Abdulaziz Salamah; Uliyan, Diaa Mohammed; Alkhalil, Adel; Abd Elrhman, Magdy; Alogali, Azizah Fhad Mohammed; Altameemi, Yaser Mohammed; Altamimi, Mohammed; Kwan, Paul			A Deep Learning Model to Predict Student Learning Outcomes in LMS Using CNN and LSTM	IEEE ACCESS																	uliyan, diaa mohammed/S-5023-2018; Altamimi, Mohammed/GQY-8154-2022; Altameemi, Yaser Mohammed/GQI-4025-2022	uliyan, diaa mohammed/0000-0002-0777-9729; Altamimi, Mohammed/0000-0002-4170-6910; Altameemi, Yaser Mohammed/0000-0002-6585-546X; Aljaloud, Abdulaziz/0000-0003-4410-2845; Kwan, Paul Wing Hing/0000-0002-4959-5274													2169-3536						2022	10
J	Alluhaidan, AS				Alluhaidan, Ala Saleh			DNA Sequence Analysis for Brain Disorder Using Deep Learning and Secure Storage	CMC-COMPUTERS MATERIALS & CONTINUA																															1546-2218	1546-2226					2022	71	3
J	Chandra, A; Verma, S; Raghuvanshi, AS; Bodhey, NK				Chandra, Anjali; Verma, Shrish; Raghuvanshi, A. S.; Bodhey, Narendra Kuber			CCsNeT: Automated Corpus Callosum segmentation using fully convolutional network based on U-Net	BIOCYBERNETICS AND BIOMEDICAL ENGINEERING																	Bodhey, Prof Dr Narendra/CAE-9983-2022	Bodhey, Prof Dr Narendra/0000-0003-1736-3329													0208-5216					JAN-MAR	2022	42	1
J	Dong, L; Li, S; Lian, WH; Wei, QC; Mohamad, OAA; Hozzein, WN; Ahmed, I; Li, WJ				Dong, Lei; Li, Shuai; Lian, Wen-Hui; Wei, Qi-Chuang; Mohamad, Osama Abdalla Abdelshafy; Hozzein, Wael N.; Ahmed, Iftikhar; Li, Wen-Jun			Sphingomonas arenae sp. nov., isolated from desert soil	INTERNATIONAL JOURNAL OF SYSTEMATIC AND EVOLUTIONARY MICROBIOLOGY																	Ahmed, Iftikhar/B-4694-2009; Abdalla Abdelshafy Mohamad, Osama/GGS-3886-2022; Hozzein, Wael/C-8518-2011	Ahmed, Iftikhar/0000-0003-0969-7927; Abdalla Abdelshafy Mohamad, Osama/0000-0002-2234-8273; Hozzein, Wael/0000-0003-2467-9719													1466-5026	1466-5034					2022	72	1
J	Fuentes, B; Gomez, F; Valdez, C; Videla, A; Castro-Severyn, J; Barahona, S; Bol, R; Riquelme, R; Quispe, J; Remonsellez, F				Fuentes, Barbara; Gomez, Francisco; Valdez, Catalina; Videla, Anael; Castro-Severyn, Juan; Barahona, Sergio; Bol, Roland; Riquelme, Rodrigo; Quispe, Javier; Remonsellez, Francisco			Effects of altitude on soil properties in coastal fog ecosystems in Morro Moreno National Park, Antofagasta, Chile	EUROPEAN JOURNAL OF SOIL SCIENCE																	Riquelme, Rodrigo/HHZ-1075-2022	Riquelme, Rodrigo/0000-0002-2643-6158; Remonsellez, Francisco/0000-0002-3930-2116; Castro-Severyn, Juan/0000-0002-4301-2226; bol, roland/0000-0003-3015-7706													1351-0754	1365-2389				JAN	2022	73	1
J	Fusar-Poli, P; de Pablo, GS; Rajkumar, RP; Lopez-Diaz, A; Malhotra, S; Heckers, S; Laverie, SM; Pillmann, F				Fusar-Poli, Paolo; de Pablo, Gonzalo Salazar; Rajkumar, Ravi Philip; Lopez-Diaz, Alvaro; Malhotra, Savita; Heckers, Stephan; Laverie, Stephen M.; Pillmann, Frank			Diagnosis, prognosis, and treatment of brief psychotic episodes: a review and research agenda	LANCET PSYCHIATRY																	López-Díaz, Álvaro/AAX-4165-2020; Rajkumar, Ravi/ABB-7319-2020; Heckers, Stephan/F-3051-2010; Fusar-Poli, Paolo/D-8605-2011	López-Díaz, Álvaro/0000-0002-6478-4807; Rajkumar, Ravi/0000-0003-2699-7438; Heckers, Stephan/0000-0003-3601-9910; Fusar-Poli, Paolo/0000-0003-3582-6788; Salazar de Pablo, Gonzalo/0000-0002-6992-0767													2215-0374					JAN	2022	9	1
J	Han, LJ; Ding, JL; Wang, JJ; Zhang, JY; Xie, BQ; Hao, JP				Han, Lijing; Ding, Jianli; Wang, Jinjie; Zhang, Junyong; Xie, Boqiang; Hao, Jianping			Monitoring Oasis Cotton Fields Expansion in Arid Zones Using the Google Earth Engine: A Case Study in the Ogan-Kucha River Oasis, Xinjiang, China	REMOTE SENSING																		Han, Lijing/0000-0002-8222-2664														2072-4292				JAN	2022	14	1
J	Han, T; Feng, Q; Yu, TF; Yang, XM; Zhang, XF; Li, K				Han, Tuo; Feng, Qi; Yu, Tengfei; Yang, Xiaomei; Zhang, Xiaofang; Li, Kuan			Characteristic of Stomatal Conductance and Optimal Stomatal Behaviour in an Arid Oasis of Northwestern China	SUSTAINABILITY																		Yu, Tengfei/0000-0002-9725-8125; Feng, Qi/0000-0002-5469-1738														2071-1050				JAN	2022	14	2
J	Jamil, I; Hong, LC; Habib, S; Aurangzeb, M; Ali, A; Ahmed, EM				Jamil, Irfan; Hong, Lucheng; Habib, Salman; Aurangzeb, Muhammad; Ali, Abdar; Ahmed, Emad M.			Performance Ratio Analysis Based on Energy Production for Large-Scale Solar Plant	IEEE ACCESS																	Ahmed, Emad M./AAA-6919-2022; Jamil, Irfan/O-2462-2014	aurangzaib, muhammad/0000-0003-4958-939X; Jamil, Irfan/0000-0001-9779-7973; , Abdar/0000-0003-3843-2362; AHMED, EMAD M./0000-0001-7828-7556; Hong, Lucheng/0000-0001-7109-5252; Habib, Salman/0000-0003-2632-2895													2169-3536						2022	10
J	Karim, K; Karim, A; Hamza, H; Manar, A; Karmous, C; Bettaieb, T				Karim, Kadri; Karim, Aounallah; Hamza, Hammadi; Manar, Abdelhafidh; Karmous, Chahine; Bettaieb, Taoufik			Effect of Pollination Technique on Agronomic and Physicochemical Characteristics of Date Palm Fruits (Phoenix dactylifera L.) cv. 'Deglet Nour'	HORTICULTURAL SCIENCE & TECHNOLOGY																	Karmous, Chahine/GRF-4668-2022; Karim, KADRI/AAX-1072-2020; karim, kadri/T-1562-2019	Karim, KADRI/0000-0003-2258-6068; karim, kadri/0000-0003-2258-6068; karmous, chahine/0000-0002-0972-4449													1226-8763	2465-8588					2022	40	2
J	Khan, IU; Saqib, M; Amin, A; Hussain, F; Li, L; Liu, YH; Fang, BZ; Ahmed, I; Li, WJ				Khan, Inam Ullah; Saqib, Muhammad; Amin, Arshia; Hussain, Firasat; Li, Li; Liu, Yong-Hong; Fang, Bao-Zhu; Ahmed, Iftikhar; Li, Wen-Jun			Noviherbaspirillum aridicola sp. nov., isolated from an arid soil in Pakistan	INTERNATIONAL JOURNAL OF SYSTEMATIC AND EVOLUTIONARY MICROBIOLOGY																	Hussain, Firasat/AEM-7643-2022; Ahmed, Iftikhar/B-4694-2009	Ahmed, Iftikhar/0000-0003-0969-7927													1466-5026	1466-5034					2022	72	2
J	Lian, WH; Li, S; Lin, ZL; Han, JR; Mohamad, OAA; Li, L; Lin, Y; Hozzein, WN; Dong, L; Li, WJ				Lian, Wen-Hui; Li, Shuai; Lin, Zhi-Liang; Han, Jia-Rui; Mohamad, Osama Abdalla Abdelshafy; Li, Li; Lin, Ying; Hozzein, Wael N.; Dong, Lei; Li, Wen-Jun			Sabulibacter ruber gen. nov., sp. nov., a novel bacterium in the family Hymenobacteraceae, isolated from desert soil	INTERNATIONAL JOURNAL OF SYSTEMATIC AND EVOLUTIONARY MICROBIOLOGY																	Abdalla Abdelshafy Mohamad, Osama/GGS-3886-2022; Hozzein, Wael/C-8518-2011	Abdalla Abdelshafy Mohamad, Osama/0000-0002-2234-8273; Hozzein, Wael/0000-0003-2467-9719													1466-5026	1466-5034					2022	72	2
J	Liu, J; Zhang, XJ; Sheng, JH				Liu, Jie; Zhang, Xiongjie; Sheng, Jinhua			Integrative analysis of the transcriptome and metabolome reveals the mechanism of saline-alkali stress tolerance in Astragalus membranaceus (Fisch) Bge. var. mongholicus (Bge.) Hsiao	FOOD QUALITY AND SAFETY																		Liu, Jie/0000-0001-7200-827X													2399-1399	2399-1402				JAN 1	2022	6
J	Liu, ZB; Liu, T; Huang, Y; Duan, YC; Pan, XH; Wang, W				Liu, Zhibin; Liu, Tie; Huang, Yue; Duan, Yangchao; Pan, Xiaohui; Wang, Wei			Comparison of Crop Evapotranspiration and Water Productivity of Typical Delta Irrigation Areas in Aral Sea Basin	REMOTE SENSING																		PAN, Xiaohui/0000-0003-2364-2965; Zhibin, Liu/0000-0002-9907-2439; Wang, Wei/0000-0003-1813-0551														2072-4292				JAN	2022	14	2
J	Muhetaer, N; Nurmemet, I; Abulaiti, A; Xiao, ST; Zhao, J				Muhetaer, Nuerbiye; Nurmemet, Ilyas; Abulaiti, Adilai; Xiao, Sentian; Zhao, Jing			A Quantifying Approach to Soil Salinity Based on a Radar Feature Space Model Using ALOS PALSAR-2 Data	REMOTE SENSING																																2072-4292				JAN	2022	14	2
J	Osma, J; Martinez-Loredo, V; Diaz-Garcia, A; Quilez-Orden, A; Peris-Baquero, O				Osma, Jorge; Martinez-Loredo, Victor; Diaz-Garcia, Amanda; Quilez-Orden, Alba; Peris-Baquero, Oscar			Spanish Adaptation of the Overall Anxiety and Depression Severity and Impairment Scales in University Students	INTERNATIONAL JOURNAL OF ENVIRONMENTAL RESEARCH AND PUBLIC HEALTH																	Diaz-Garcia, Amanda/E-4001-2019; Peris Baquero, Oscar/B-3937-2019; Osma Lopez, Jorge Javier/F-9221-2011	Diaz-Garcia, Amanda/0000-0003-4398-4014; Peris Baquero, Oscar/0000-0002-2437-1207; Osma Lopez, Jorge Javier/0000-0002-7293-318X; Martinez Loredo, Victor/0000-0002-0403-5273														1660-4601				JAN	2022	19	1
J	Rajivgandhi, G; Gnanamangai, BM; Prabha, TH; Poornima, S; Maruthupandy, M; Alharbi, NS; Kadaikunnan, S; Li, WJ				Rajivgandhi, Govindan; Gnanamangai, Balasubramanian Mythili; Prabha, Thirumoorthy Heela; Poornima, Shanmugam; Maruthupandy, Muthuchamy; Alharbi, Naiyf S.; Kadaikunnan, Shine; Li, Wen-Jun			Biosynthesized zinc oxide nanoparticles (ZnO NPs) using actinomycetes enhance the anti-bacterial efficacy against K. Pneumoniae	JOURNAL OF KING SAUD UNIVERSITY SCIENCE																	Kadaikunnan, Shine/L-2836-2013; Govindan, Rajivgandhi/ABG-5120-2021	Kadaikunnan, Shine/0000-0001-7018-5379; Govindan, Rajivgandhi/0000-0003-4907-8100													1018-3647	2213-686X				JAN	2022	34	1
J	Rajivgandhi, GN; Ramachandran, G; Kannan, MR; Velanganni, AAJ; Siddiqi, MZ; Alharbi, NS; Kadaikunnan, S; Li, WJ				Rajivgandhi, Govindan Nadar; Ramachandran, Govindan; Kannan, Moorthy Rajesh; Velanganni, Arockiam Antony Joseph; Siddiqi, Muhammad Zubair; Alharbi, Naiyf S.; Kadaikunnan, Shine; Li, Wen -Jun			Photocatalytic degradation and anti-cancer activity of biologically synthesized Ag NPs for inhibit the MCF-7 breast cancer cells	JOURNAL OF KING SAUD UNIVERSITY SCIENCE																	Govindan, Rajivgandhi/ABG-5120-2021; Kadaikunnan, Shine/L-2836-2013	Govindan, Rajivgandhi/0000-0003-4907-8100; Kadaikunnan, Shine/0000-0001-7018-5379													1018-3647	2213-686X				JAN	2022	34	1
J	Shaji, S; Ronickom, JFA; Ramaniharan, AK; Swaminathan, R				Shaji, Sreelakshmi; Ronickom, Jac Fredo Agastinose; Ramaniharan, Anandh Kilpattu; Swaminathan, Ramakrishnan			Study on the effect of extreme learning machine and its variants in differentiating Alzheimer conditions from selective regions of brain MR images	EXPERT SYSTEMS WITH APPLICATIONS																															0957-4174	1873-6793					2022	209
J	Shublaq, I; Abu Raed, A; Alqalami, T; Altwassi, E; Pizarro, R				Shublaq, Inshirah; Abu Raed, Abeer; Alqalami, Tamarah; Altwassi, Esraa; Pizarro, Rafael			Integrating the traditional Emirati community within urban fabric of the city to enhance the historical identity	HELIYON																	Alqalami, Tamarah/AAI-4962-2021	Alqalami, Tamarah/0000-0003-4853-7344; Abu raed, Abeer/0000-0003-0766-4494														2405-8440				JAN	2022	8	1
J	Wang, XX; Qiao, D; Chen, YH; Zou, GY; Liu, BY; Zhang, JJ; Liu, BS				Wang Xuexia; Qiao Dan; Chen Yanhua; Zou Guoyuan; Liu Baoyin; Zhang Jiajia; Liu Bensheng			EFFECTS OF LONG-TERM FILM MULCHING ON THE CHARACTERISTICS OF SOIL RESIDUAL FILM IN TOPSOIL LAYER OF MAIZE PLANTED IN NORTHERN CHINA	FRESENIUS ENVIRONMENTAL BULLETIN																															1018-4619	1610-2304					2022	31	3
J	Wang, Z; Huang, Y; Liu, T; Zan, CJ; Ling, YA; Guo, CY				Wang, Zheng; Huang, Yue; Liu, Tie; Zan, Chanjuan; Ling, Yunan; Guo, Chenyu			Analysis of the Water Demand-Supply Gap and Scarcity Index in Lower Amu Darya River Basin, Central Asia	INTERNATIONAL JOURNAL OF ENVIRONMENTAL RESEARCH AND PUBLIC HEALTH																	Wang, Zheng/GXM-6323-2022	, wang/0000-0003-1866-6268														1660-4601				JAN	2022	19	2
J	Yan, JM; Li, YG; Maisupova, B; Zhou, XB; Zhang, J; Liu, HL; Yin, BF; Zang, YX; Tao, Y; Zhang, YM				Yan, Jing-Ming; Li, Yong-Gang; Maisupova, Bagila; Zhou, Xiao-Bing; Zhang, Jing; Liu, Hui-Liang; Yin, Ben-Feng; Zang, Yong-Xin; Tao, Ye; Zhang, Yuan-Ming			Effects of growth decline on twig functional traits of wild apple trees in two long-term monitoring plots in Yili Valley: Implication for their conservation	GLOBAL ECOLOGY AND CONSERVATION																		Zhang, Yuanming/0000-0003-1370-4181														2351-9894				JAN	2022	33
J	Yehmed, J; Tlahig, S; Ayeb, N; Mohamed, A; Yahia, H; Dbara, M; Loumerem, M				Yehmed, Jamila; Tlahig, Samir; Ayeb, Naziha; Mohamed, Amina; Yahia, Hedi; Dbara, Mohamed; Loumerem, Mohamed			Agro-Morphological, Yield Components and Nutritional Quality Attributes of Vicia faba L. var. Minor Cropped in Tunisian Arid Regions	POLISH JOURNAL OF ENVIRONMENTAL STUDIES																	Tlahig, Samir/G-6548-2013; Tlahig, Samir/AAV-6092-2021	Tlahig, Samir/0000-0002-2742-2428; Tlahig, Samir/0000-0002-2742-2428													1230-1485	2083-5906					2022	31	1
J	Correll, CU; Adli, M; Otte, C; Bauer, M; Falkai, P; Jessen, F; Meyer-Lindenberg, A; Nohles, VB; Reif, A; Bermpohl, F				Correll, C. U.; Adli, M.; Otte, C.; Bauer, M.; Falkai, P.; Jessen, F.; Meyer-Lindenberg, A.; Nohles, V. B.; Reif, A.; Bermpohl, F.			Outcome Associated with Suicidality in Inpatients with Symptoms of depression (OASIS-D): Design of a study assessing usual care outcomes	EUROPEAN NEUROPSYCHOPHARMACOLOGY					34th European-College-of-Neuropsychopharmacology (ECNP) Congress on Early Career Scientists in Europe	2021	Lisbon, PORTUGAL	European Coll Neuropsychopharmacol									Adli, Mazda/GYV-2083-2022; Correll, Christoph/D-3530-2011	Correll, Christoph/0000-0002-7254-5646													0924-977X	1873-7862				DEC	2021	53
J	Elqars, E; Oubella, A; Hachim, ME; Byadi, S; Auhmani, A; Guennoun, M; Essadki, A; Riahi, A; Robert, A; Itto, MYA; Nbigui, T				Elqars, Esseddik; Oubella, Ali; Hachim, Mouhi Eddine; Byadi, Said; Auhmani, Aziz; Guennoun, Mohamed; Essadki, Abdelhafid; Riahi, Abdelkhalek; Robert, Anthony; Itto, Moulay Youssef Ait; Nbigui, Taibi			New 3-(2-methoxyphenyl)-isoxazole-carvone: synthesis, spectroscopic characterization, and prevention of carbon steel corrosion in hydrochloric acid	JOURNAL OF MOLECULAR LIQUIDS																		HACHIM, Mouhi Eddine/0000-0001-7692-5323; ali, oubbela/0000-0002-7277-318X													0167-7322	1873-3166				FEB 1	2022	347
J	Somoza, L; Rueda, JL; Gonzalez, FJ; Rincon-Tomas, B; Medialdea, T; Sanchez-Guillamon, O; Hoppert, M; Vazquez, JT; Madureira, P; Santofimia, E; Lopez-Pamo, E; Palomino, D; Ortiz, JE; Blanco, L; Fernandez-Puga, MD; Fernandez-Salas, LM; Reitner, J				Somoza, Luis; Rueda, Jose Luis; Gonzalez, Francisco J.; Rincon-Tomas, Blanca; Medialdea, Teresa; Sanchez-Guillamon, Olga; Hoppert, Michael; Vazquez, Juan T.; Madureira, Pedro; Santofimia, Esther; Lopez-Pamo, Enrique; Palomino, Desiree; Ortiz, Jose Eugenio; Blanco, Lorena; del Carmen Fernandez-Puga, Maria; Fernandez-Salas, L. M.; Reitner, Joachim			A relict oasis of living deep-sea mussels Bathymodiolus and microbial-mediated seep carbonates at newly-discovered active cold seeps in the Gulf of Cadiz, NE Atlantic Ocean	PALZ																	Somoza, Luis/C-1400-2010; Rincón-Tomás, Blanca/ABG-2881-2020; Vazquez, Juan-Tomas/T-6271-2019; Ortiz, José/D-5751-2017	Somoza, Luis/0000-0001-5451-2288; Rincón-Tomás, Blanca/0000-0003-1011-1508; Vazquez, Juan-Tomas/0000-0002-3747-4838; Ortiz, José/0000-0002-5699-2593; Gonzalez, Javier/0000-0002-6311-1950													0031-0220	1867-6812				DEC	2021	95	4
J	Yang, W; Li, HD; Liu, JY; Shao, H; Hua, J; Luo, SH				Yang, Wan; Li, Hongdi; Liu, Jiayi; Shao, Hua; Hua, Juan; Luo, Shihong			Degraded Metabolites of Phlorizin Promote Germination of Valsa mali var. mali in its Host Malus spp.	JOURNAL OF AGRICULTURAL AND FOOD CHEMISTRY																		Shihong, Luo/0000-0003-3500-3466													0021-8561	1520-5118				JAN 12	2022	70	1
J	Faris, M; Sabour, AA				Faris, Mahmoud; Sabour, Ayman Abdel			Calcareous nannofossil biostratigraphy of Nag El Quda, South of Dababiya, Eastern side of the Nile Valley, Egypt	JOURNAL OF AFRICAN EARTH SCIENCES																															1464-343X	1879-1956				FEB	2022	186
J	Sadraoui-Ajmi, I; Benali, N; Soltani, A; Chaib, S; Limem, E; Jallouli, S; Boushih, E; Fajraoui, A; Mediouni-Ben Jemaa, J				Sadraoui-Ajmi, Insaf; Benali, Nejib; Soltani, Abir; Chaib, Samira; Limem, Essia; Jallouli, Slim; Boushih, Emna; Fajraoui, Abdallah; Mediouni-Ben Jemaa, Jouda			Usage of agricultural DAP-fertilizer and Eucalyptus essential oils as potential attractants against the mediterranean fruit fly Ceratitis capitata (Tephritidae)	JOURNAL OF ASIA-PACIFIC ENTOMOLOGY																															1226-8615	1876-7990				MAR	2022	25	1
J	Solmi, M; Estrade, A; Thompson, T; Agorastos, A; Radua, J; Cortese, S; Dragioti, E; Leisch, F; Vancampfort, D; Thygesen, LC; Aschauer, H; Schloegelhofer, M; Akimova, E; Schneeberger, A; Huber, CG; Hasler, G; Conus, P; Do Cuenod, KQ; von Kanel, R; Arrondo, G; Fusar-Poli, P; Gorwood, P; Llorca, PM; Krebs, MO; Scanferla, E; Kishimoto, T; Rabbani, G; Skonieczna-Zydecka, K; Brambilla, P; Favaro, A; Ta…				Solmi, Marco; Estrade, Andres; Thompson, Trevor; Agorastos, Agorastos; Radua, Joaquim; Cortese, Samuele; Dragioti, Elena; Leisch, Friedrich; Vancampfort, Davy; Thygesen, Lau Caspar; Aschauer, Harald; Schloegelhofer, Monika; Akimova, Elena; Schneeberger, Andres; Huber, Christian G.; Hasler, Gregor; Conus, Philippe; Do Cuenod, Kim Q.; von Kanel, Roland; Arrondo, Gonzalo; Fusar-Poli, Paolo; Gorwood,…			The collaborative outcomes study on health and functioning during infection times in adults (COH-FIT-Adults): Design and methods of an international online survey targeting physical and mental health effects of the COVID-19 pandemic	JOURNAL OF AFFECTIVE DISORDERS																	Marlicz, Wojciech/G-5007-2013; Zoccante, Leonardo/GVU-0043-2022; Radua, Joaquim/H-6424-2019; Janků, Karolina/CAA-1828-2022; Samochowiec, Jerzy/GMX-0900-2022; Guu, Ta-wei/CAI-2296-2022; Correll, Christoph/D-3530-2011; Marx, Wolfgang/AFO-7355-2022; Teasdale, Scott/AFP-0676-2022; Papsuev, Oleg/I-2870-2016; Hasler, Gregor/AGJ-5301-2022; Brunoni, Andre R./H-8394-2012; Koyanagi, Ai/D-3833-2018; Vassilo…	Marlicz, Wojciech/0000-0002-2649-5967; Zoccante, Leonardo/0000-0002-1170-9328; Radua, Joaquim/0000-0003-1240-5438; Samochowiec, Jerzy/0000-0003-1438-583X; Correll, Christoph/0000-0002-7254-5646; Marx, Wolfgang/0000-0002-8556-8230; Papsuev, Oleg/0000-0003-3233-2432; Hasler, Gregor/0000-0002-8311-0138; Brunoni, Andre R./0000-0002-6310-3571; Koyanagi, Ai/0000-0002-9565-5004; Vassilopoulou, Emilia/00…													0165-0327	1573-2517				FEB 15	2022	299
J	Solmi, M; Estrade, A; Thompson, T; Agorastos, A; Radua, J; Cortese, S; Dragioti, E; Leisch, F; Vancampfort, D; Thygesen, LC; Aschauer, H; Schloegelhofer, M; Akimova, E; Schneeberger, A; Huber, CG; Hasler, G; Conus, P; Do Cuenod, KQ; von Kanel, R; Arrondo, G; Fusar-Poli, P; Gorwood, P; Llorca, PM; Krebs, MO; Scanferla, E; Kishimoto, T; Rabbani, G; Skonieczna-Zydecka, K; Brambilla, P; Favaro, A; Ta…				Solmi, Marco; Estrade, Andres; Thompson, Trevor; Agorastos, Agorastos; Radua, Joaquim; Cortese, Samuele; Dragioti, Elena; Leisch, Friedrich; Vancampfort, Davy; Thygesen, Lau Caspar; Aschauer, Harald; Schloegelhofer, Monika; Akimova, Elena; Schneeberger, Andres; Huber, Christian G.; Hasler, Gregor; Conus, Philippe; Do Cuenod, Kim Q.; von Kanel, Roland; Arrondo, Gonzalo; Fusar-Poli, Paolo; Gorwood,…			Physical and mental health impact of COVID-19 on children, adolescents, and their families: The Collaborative Outcomes study on Health and Functioning during Infection Times-Children and Adolescents (COH-FIT-C&A)	JOURNAL OF AFFECTIVE DISORDERS																	Schuch, Felipe/AAF-5028-2019; Sun, Ching-fang/I-2810-2015; Maes, Michael/B-8546-2011; Teasdale, Scott/AFP-0676-2022; Schuch, Felipe/AAH-2586-2019; Brunoni, Andre R./H-8394-2012; Solanes, Aleix/HGB-1640-2022; Demurtas, Jacopo/ACH-2667-2022; Colizzi, Marco/K-3449-2016; Manková, Denisa/AAH-5961-2020; Veronese, Nicola/K-4343-2018; Aizberg, Oleg/AAD-9201-2022; Hasler, Gregor/AGJ-5301-2022; Marlicz, Wo…	Schuch, Felipe/0000-0002-5190-4515; Maes, Michael/0000-0002-2012-871X; Schuch, Felipe/0000-0002-5190-4515; Brunoni, Andre R./0000-0002-6310-3571; Solanes, Aleix/0000-0002-2491-200X; Demurtas, Jacopo/0000-0003-3001-8546; Colizzi, Marco/0000-0001-6139-1920; Manková, Denisa/0000-0002-9705-9361; Veronese, Nicola/0000-0002-9328-289X; Hasler, Gregor/0000-0002-8311-0138; Marlicz, Wojciech/0000-0002-2649…													0165-0327	1573-2517				FEB 15	2022	299
J	Fischer, G; Romero, OE; Karstensen, J; Baumann, KH; Moradi, N; Iversen, M; Ruhland, G; Klann, M; Kortzinger, A				Fischer, Gerhard; Romero, Oscar E.; Karstensen, Johannes; Baumann, Karl-Heinz; Moradi, Nasrollah; Iversen, Morten; Ruhland, Goetz; Klann, Marco; Koertzinger, Arne			Seasonal flux patterns and carbon transport from low-oxygen eddies at the Cape Verde Ocean Observatory: lessons learned from a time series sediment trap study (2009-2016)	BIOGEOSCIENCES																	Körtzinger, Arne/A-4141-2014; Karstensen, Johannes/A-8534-2013; Iversen, Morten Hvitfeldt/Q-3774-2016	Körtzinger, Arne/0000-0002-8181-3593; Karstensen, Johannes/0000-0001-5044-7079; Romero, Oscar/0000-0003-0209-3258; Fischer, Gerhard/0000-0001-5089-4741; Iversen, Morten Hvitfeldt/0000-0002-5287-1110													1726-4170	1726-4189				DEC 17	2021	18	24
J	Chen, CL; Chen, X; Qian, J; Hu, ZY; Liu, J; Xing, XW; Yimamaidi, D; Zhakan, Z; Sun, JY; Wei, SJ				Chen, Chao liang; Chen, Xi; Qian, Jing; Hu, Zengyun; Liu, Jun; Xing, Xiuwei; Yimamaidi, Duman; Zhakan, Zhanar; Sun, Jiayu; Wei, Shujie			Spatiotemporal changes, trade-offs, and synergistic relationships in ecosystem services provided by the Aral Sea Basin	PEERJ																															2167-8359					DEC 16	2021	9
J	Xie, YH; Li, ZH; Zhu, L; Zhou, YJ; Liu, HY; Yu, T				Xie, Yunhu; Li, Zhanhong; Zhu, Li; Zhou, Yujuan; Liu, Hongyu; Yu, Ting			Dynamic monitoring of desertification in response to climatic factors: a case study from the Gelintan Oasis on the southeastern edge of the Tengger Desert, China	GEOCARTO INTERNATIONAL																															1010-6049	1752-0762
J	Elqars, E; Hachim, ME; Oubella, A; Byadi, S; Bahsis, L; Auhmani, A; Guennoun, M; Essadki, A; Itto, MYA; Nbigui, T				Elqars, Esseddik; Hachim, Mouhi Eddine; Oubella, Ali; Byadi, Said; Bahsis, Lahoucine; Auhmani, Aziz; Guennoun, Mohamed; Essadki, Abdelhafid; Ait Itto, My Youssef; Nbigui, Taibi			L'action inhibitrice de la 3-phenyl-isoxazoline-carvone sur l'acier au carbone en solution de HCl a ete etudiee experimentalement et theoriquement	JOURNAL OF ADHESION SCIENCE AND TECHNOLOGY																		HACHIM, Mouhi Eddine/0000-0001-7692-5323; ali, oubbela/0000-0002-7277-318X													0169-4243	1568-5616				NOV 2	2022	36	21
J	Maimaiti, B; Chen, SS; Kasimu, A; Simayi, Z; Aierken, N				Maimaiti, Bumairiyemu; Chen, Shuisen; Kasimu, Alimujiang; Simayi, Zibibula; Aierken, Nuermaimaiti			Urban spatial expansion and its impacts on ecosystem service value of typical oasis cities around Tarim Basin, northwest China	INTERNATIONAL JOURNAL OF APPLIED EARTH OBSERVATION AND GEOINFORMATION																	Kasimu, Alimujiang/GRJ-2729-2022	Kasimu, Alimujiang/0000-0003-0468-6559													1569-8432	1872-826X				DEC 15	2021	104
J	Bansal, D; Khanna, K; Chhikara, R; Dua, RK; Malhotra, R				Bansal, Deepika; Khanna, Kavita; Chhikara, Rita; Dua, Rakesh Kumar; Malhotra, Rajeev			Superpixel powered autoencoder technique for detecting dementia	EXPERT SYSTEMS																															0266-4720	1468-0394				JUN	2022	39	5
J	Hare, ML; Wang, YD; Xu, XW; Yuan, Y; Na, Z; Gedda, AE				Hare, Malicha L.; Wang, Yong D.; Xu, Xin W.; Yuan, You; Na, Zhou; Gedda, Abule E.			Do Bush Control Techniques Have an Effect on the Density, Cover and Recruitment of Woody Plants in a Semi-Arid Savanna? The Case of a Semi-Arid Savanna, Southern Ethiopia	FRONTIERS IN ENVIRONMENTAL SCIENCE																																2296-665X				DEC 14	2021	9
J	Leon-Llamas, JL; Villafaina, S; Murillo-Garcia, A; Dominguez, PR; Gusi, N				Luis Leon-Llamas, Juan; Villafaina, Santos; Murillo-Garcia, Alvaro; Rohlfs Dominguez, Paloma; Gusi, Narcis			Relationship between pineal gland, sleep and melatonin in fibromyalgia women: a magnetic resonance imaging study	ACTA NEUROPSYCHIATRICA																	Gusi, Narcis/C-3870-2010	Gusi, Narcis/0000-0002-1001-8883; Leon-Llamas, Juan Luis/0000-0002-0757-5937													1601-5215					APR	2022	34	2
J	Dalton, M; McMahon, J; Kennedy, MA; Repper, R; Al Shilali, SE; AlBalawi, Y; Boyer, DD; Thomas, H				Dalton, Matthew; McMahon, Jane; Kennedy, Melissa A.; Repper, Rebecca; Al Shilali, Saifi Eisa; AlBalawi, Yousef; Boyer, David D.; Thomas, Hugh			The Middle Holocene 'funerary avenues' of north-west Arabia	HOLOCENE																		Repper, Rebecca/0000-0002-7515-6558; Dalton, Matthew/0000-0002-1651-7384; Thomas, Hugh/0000-0002-2232-7931; McMahon, Jane/0000-0002-5402-234X; Kennedy, Melissa A./0000-0001-8620-938X													0959-6836	1477-0911				MAR	2022	32	3
J	Hamdan, S; Cheaitou, A; Jouini, O; Granberg, TA; Jemai, Z; Alsyouf, I; Bettayeb, M; Josefsson, B				Hamdan, Sadeque; Cheaitou, Ali; Jouini, Oualid; Granberg, Tobias Andersson; Jemai, Zied; Alsyouf, Imad; Bettayeb, Maamar; Josefsson, Billy			Central Authority-Controlled Air Traffic Flow Management: An Optimization Approach	TRANSPORTATION SCIENCE																	Bettayeb, Maamar/GVT-2476-2022	Hamdan, Sadeque/0000-0002-5265-0836; Jouini, Oualid/0000-0002-9498-165X; Alsyouf, Imad/0000-0002-6200-8919; Granberg, Tobias/0000-0002-5868-2388; Jemai, Ziad/0000-0001-7679-9670													0041-1655					MAR-APR	2022	56	2
J	Jin, YL; Li, JH; Zhu, QH; Du, X; Liu, F; Li, YJ; Ahmar, S; Zhang, XY; Sun, J; Xue, F				Jin, Yanlong; Li, Jinghui; Zhu, Qianhao; Du, Xin; Liu, Feng; Li, Yanjun; Ahmar, Sunny; Zhang, Xinyu; Sun, Jie; Xue, Fei			GhAPC8 regulates leaf blade angle by modulating multiple hormones in cotton (Gossypium hirsutum L.)	INTERNATIONAL JOURNAL OF BIOLOGICAL MACROMOLECULES																	Zhu, Qian-Hao/A-1298-2010; Ahmar, Sunny/HGS-2259-2022	Zhu, Qian-Hao/0000-0002-6505-7417; fei, Xue/0000-0001-6311-1961													0141-8130	1879-0003				JAN 15	2022	195
J	Wen, ZB; Song, F; Feng, Y; Zhang, HX				Wen, Zhi-Bin; Song, Feng; Feng, Ying; Zhang, Hong-Xiang			Molecular phylogeny of Nanophyton L. (Chenopodioideae): emphasis on the similar species N. erinaceum and N. mongolicum	NORDIC JOURNAL OF BOTANY																															0107-055X	1756-1051				FEB	2022	2022	2
J	Mahesh, BS; Nair, A; Ghadi, P; Warrier, AK; Mohan, R				Mahesh, B. S.; Nair, Abhilash; Ghadi, Pooja; Warrier, Anish Kumar; Mohan, Rahul			Holocene sedimentology in an isolation basin in the Larsemann Hills, East Antarctica	POLAR SCIENCE																	Warrier, Anish Kumar/AAW-8890-2020	Warrier, Anish Kumar/0000-0003-0044-6224													1873-9652	1876-4428				DEC	2021	30
J	Ray, Y; Sen, S; Sen, K; Beg, MJ				Ray, Yogesh; Sen, Subhajit; Sen, Koushick; Beg, M. Javed			Quantifying the past glacial movements in Schirmacher Oasis, East Antarctica	POLAR SCIENCE																	; Ray, Yogesh/A-9564-2012	Sen, Koushick/0000-0003-0701-0626; Ray, Yogesh/0000-0001-7236-9323													1873-9652	1876-4428				DEC	2021	30
J	Thakur, PK; Swain, AK; Dhote, PR; Kumar, P; Kaushik, S; Gajbhiye, D; Mahagaonkar, A; Sharma, V; Dharwadkar, A; Aggarwal, SP; Beg, J; Chauhan, P; Kumar, AS				Thakur, Praveen K.; Swain, Ashit K.; Dhote, Pankaj R.; Kumar, Pradeep; Kaushik, Suvrat; Gajbhiye, Deepak; Mahagaonkar, Anirudha; Sharma, Vishal; Dharwadkar, Amit; Aggarwal, S. P.; Beg, Javed; Chauhan, Prakash; Kumar, A. Senthil			Satellite and ground based estimates for ice surface velocities in the part of central Dronning Maud Land, East Antarctica: Implications for ice flux calculations	POLAR SCIENCE																		Dhote, Pankaj R./0000-0002-3483-0059; Kaushik, Suvrat/0000-0002-8947-5234; Sharma, Vishal/0000-0002-1946-2868													1873-9652	1876-4428				DEC	2021	30
J	Warrier, AK; Mahesh, BS; Sebastian, JG; Mohan, R				Warrier, Anish Kumar; Mahesh, B. S.; Sebastian, Joju George; Mohan, Rahul			How strong was pedogenesis in Schirmacher Oasis during the Late Quaternary?	POLAR SCIENCE																	Warrier, Anish Kumar/AAW-8890-2020	Warrier, Anish Kumar/0000-0003-0044-6224; Sebastian, Joju George/0000-0002-0342-2159													1873-9652	1876-4428				DEC	2021	30
J	Rajivgandhi, G; Gnanamangai, BM; Ramachandran, G; Chackaravarthy, G; Chelliah, CK; Maruthupandy, M; Alharbi, NS; Kadaikunnan, S; Li, WJ				Rajivgandhi, Govindan; Gnanamangai, Balasubramanian Mythili; Ramachandran, Govindan; Chackaravarthy, Gnanasekaran; Chelliah, Chenthis Kanisha; Maruthupandy, Muthuchamy; Alharbi, Naiyf S.; Kadaikunnan, Shine; Li, Wen-Jun			Effective removal of heavy metals in industrial wastewater with novel bioactive catalyst enabling hybrid approach	ENVIRONMENTAL RESEARCH																	Muthuchamy, Maruthupandy/R-2689-2019; Kadaikunnan, Shine/L-2836-2013; Govindan, Rajivgandhi/ABG-5120-2021; Tolosa, Tewodros/AAB-6288-2022	Kadaikunnan, Shine/0000-0001-7018-5379; Govindan, Rajivgandhi/0000-0003-4907-8100;													0013-9351	1096-0953				MAR	2022	204		C
J	Ziane, A; Douaoui, A; Yahiaoui, I; Pulido, M; Larid, M; Gulakhmadov, A; Chen, X				Ziane, Ahmed; Douaoui, Abdelkader; Yahiaoui, Ibrahim; Pulido, Manuel; Larid, Mohamed; Gulakhmadov, Aminjon; Chen, Xi			Upgrading the Salinity Index Estimation and Mapping Quality of Soil Salinity Using Artificial Neural Networks in the Lower-Cheliff Plain of Algeria in North Africa Amelioration de l'estimation de l'indice de salinite et de la qualite de la cartographie de la salinite des sols en utilisant les reseaux de neurones artificiels dans la plaine du Bas Cheliff au Nord de l'Algerie	CANADIAN JOURNAL OF REMOTE SENSING																	Douaoui, Abdelkader/HGE-0786-2022; Pulido, Manuel/L-8277-2018	Douaoui, Abdelkader/0000-0002-3941-1312; Ziane, Ahmed/0000-0002-8878-8810; YAHIAOUI, IBRAHIM/0000-0001-5164-981X; Pulido, Manuel/0000-0001-9340-0107; Gulakhmadov, Aminjon/0000-0002-7289-8310													0703-8992	1712-7971				MAR 4	2022	48	2
J	AbdelGawad, MK; Abu El-Kheir, GA; Kassab, WG				AbdelGawad, Mohamed K.; Abu El-Kheir, Gebely A.; Kassab, Walid G.			The youngest records of mosasaurid reptiles from the Upper Cretaceous of the South-Western Desert in Egypt	PROCEEDINGS OF THE GEOLOGISTS ASSOCIATION																		Kassab, Walid/0000-0001-9882-9607; Abdel Gawad, Mohamed/0000-0002-3229-3800													0016-7878					OCT	2021	132	5
J	Clariana, P; Soto, R; Ayala, C; Casas-Sainz, AM; Roman-Berdiel, T; Oliva-Urcia, B; Pueyo, EL; Beamud, E; Rey-Moral, C; Rubio, F; Margalef, A; Schamuells, S; Bach, N; Marti, J				Clariana, P.; Soto, R.; Ayala, C.; Casas-Sainz, A. M.; Roman-Berdiel, T.; Oliva-Urcia, B.; Pueyo, E. L.; Beamud, E.; Rey-Moral, C.; Rubio, F.; Margalef, A.; Schamuells, S.; Bach, N.; Marti, J.			Basement and cover architecture in the Central Pyrenees constrained by gravity data	INTERNATIONAL JOURNAL OF EARTH SCIENCES																	Roman-Berdiel, Teresa/E-7648-2016; Pueyo, Emilio L./L-6574-2014; Soto, Ruth/L-2793-2014	Roman-Berdiel, Teresa/0000-0002-9743-8695; Pueyo, Emilio L./0000-0001-8480-381X; Soto, Ruth/0000-0002-1929-8850; REY-MORAL, CARMEN/0000-0001-5124-2200; Schamuells, Stefania/0000-0002-2540-7750													1437-3254	1437-3262				MAR	2022	111	2
J	Yuan, ZN; Wang, HJ; Gao, Y; Qu, SN; Huang, CL; Wang, H; Zhang, H; Xing, XZ				Yuan, Zhen-Nan; Wang, Hai-Jun; Gao, Yong; Qu, Shi-Ning; Huang, Chu-Lin; Wang, Hao; Zhang, Hao; Xing, Xue-Zhong			Short- and medium-term survival of critically ill patients with solid cancer admitted to the intensive care unit	ANNALS OF PALLIATIVE MEDICINE																															2224-5820	2224-5839				MAY	2022	11	5
J	Amro, A; Salama, FM; Abd El-Ghani, MM; El-Zohary, AM; El-Shazoly, RM				Amro, A.; Salama, F. M.; El-Ghani, M. M. Abd; El-Zohary, A. M.; El-Shazoly, R. M.			VARIATIONS IN COMMUNITY STRUCTURE AND PLANT SPECIES DIVERSITY WITH SOIL PROPERTIES IN A HYPER-ARID COASTAL DESERT OF EGYPT	JOURNAL OF ANIMAL AND PLANT SCIENCES-JAPS																	Amro, Ahmed/AAD-4722-2020	Amro, Ahmed/0000-0003-4368-250X													1018-7081	2309-8694				DEC	2021	31	6
J	Berred, S; Berred, K				Berred, Sanae; Berred, Khadija			Climate Change Issues, Challenges, and Impacts in Terms of Rural Geo-biological and Cultural Tourism Activity Development in Semiarid Areas: a Case Study from Tata, Bani Geopark (Anti-Atlas, South Morocco)	GEOHERITAGE																	BERRED, Sanae/AAE-5726-2019	BERRED, Sanae/0000-0003-2985-8345													1867-2477	1867-2485				DEC	2021	13	4
J	Elbeih, SF				Elbeih, Salwa F.			Evaluation of agricultural expansion areas in the Egyptian deserts: A review using remote sensing and GIS q	EGYPTIAN JOURNAL OF REMOTE SENSING AND SPACE SCIENCES																		Elbeih, Salwa/0000-0002-2443-6787													1110-9823	2090-2476				DEC	2021	24	3	2
J	Jeder, H; Abdelhamid, A; Salah, A				Jeder, Houcine; Abdelhamid, Amira; Salah, Ahmed			Smallholder farmers' perceptions and adaptation strategies to mitigate the effect of climate change in the oases of South-Eastern Tunisia	NEW MEDIT																															1594-5685	2611-1128				DEC	2021	20	5
J	Kleinjan, CA; Hoffmann, JH; Heystek, F; Ivey, P; Kistensamy, Y				Kleinjan, C. A.; Hoffmann, J. H.; Heystek, F.; Ivey, P.; Kistensamy, Y.			Developments and prospects for biological control of Prosopis (Leguminosae) in South Africa	AFRICAN ENTOMOLOGY																															1021-3589	1026-4914				DEC	2021	29	3
J	Liu, W; Ma, L; Abuduwaili, J				Liu, Wen; Ma, Long; Abuduwaili, Jilili			Potentially Toxic Elements in Oasis Agricultural Soils Caused by High-Intensity Exploitation in the Piedmont Zone of the Tianshan Mountains, China	AGRICULTURE-BASEL																		ji, li li/0000-0001-8483-1554; Liu, Wen/0000-0002-5524-0496; Ma, Long/0000-0002-8233-8640														2077-0472				DEC	2021	11	12
J	Lyu, Y; Huang, Y; Bao, AM; Zhong, RS; Yang, H				Lyu, Ye; Huang, Yue; Bao, Anming; Zhong, Ruisen; Yang, Han			Temporal/Spatial Variation of Terrestrial Water Storage and Groundwater Storage in Typical Inland River Basins of Central Asia	WATER																																2073-4441				DEC	2021	13	23
J	Moat, J; Orellana-Garcia, A; Tovar, C; Arakaki, M; Arana, C; Cano, A; Faundez, L; Gardner, M; Hechenleitner, P; Hepp, J; Lewis, G; Mamani, JM; Miyasiro, M; Whaley, OQ				Moat, Justin; Orellana-Garcia, Alfonso; Tovar, Carolina; Arakaki, Monica; Arana, Cesar; Cano, Asuncion; Faundez, Luis; Gardner, Martin; Hechenleitner, Paulina; Hepp, Josefina; Lewis, Gwilym; Mamani, Jose-Manuel; Miyasiro, Maria; Whaley, Oliver Q.			Seeing through the clouds - Mapping desert fog oasis ecosystems using 20 years of MODIS imagery over Peru and Chile	INTERNATIONAL JOURNAL OF APPLIED EARTH OBSERVATION AND GEOINFORMATION																	Arana, César/AAO-1077-2021	Arana, César/0000-0002-7566-5205; Tovar, Carolina/0000-0002-8256-9174; ORELLANA GARCIA, ALFONSO/0000-0003-4021-695X; MAMANI CCOTO, Jose Manuel/0000-0001-6417-2192													1569-8432	1872-826X				DEC 1	2021	103
J	Nadar, RG; Chackaravarthy, G; Ramachandran, G; Manoharan, N; Siddiqi, MZ; Alharbi, NS; Alobaidi, AS; Li, WJ				Nadar, Rajivgandhi Govindan; Chackaravarthy, Gnanasekaran; Ramachandran, Govindan; Manoharan, Natesan; Siddiqi, Muhammad Zubair; Alharbi, Naiyf S.; Alobaidi, Ahmed S.; Li, Wen-Jun			Isolation and molecular identification of biofilm producing P. aeruginosa and K. pneumoniae from urinary tract infections patient urine sample	JOURNAL OF INFECTION AND PUBLIC HEALTH																	Govindan, Rajivgandhi/ABG-5120-2021	Govindan, Rajivgandhi/0000-0003-4907-8100													1876-0341	1876-035X				DEC	2021	14	12
J	Ochege, FU; Shi, HY; Li, CF; Ma, XF; Igboeli, EE; Luo, GP				Ochege, Friday Uchenna; Shi, Haiyang; Li, Chaofan; Ma, Xiaofei; Igboeli, Emeka Edwin; Luo, Geping			Assessing Satellite, Land Surface Model and Reanalysis Evapotranspiration Products in the Absence of In-Situ in Central Asia	REMOTE SENSING																	Ochege, Friday Uchenna/AAF-6958-2021; Ma, Xiaofei/ABB-5302-2022	Ochege, Friday Uchenna/0000-0002-6661-0966; Ma, Xiaofei/0000-0001-9456-0065; Shi, Haiyang/0000-0002-6105-4737; luo, ge ping/0000-0003-0553-9454														2072-4292				DEC	2021	13	24
J	Justavino, RJO; Loyola, PF; Gimenez, JAL				Ortega Justavino, Richard Jose; Fernando Loyola, Pablo; Llera Gimenez, Joaquin Antonio			Assessment of fodder corn grown under surface and subsurface drip irrigation in Mendoza, Argentina	REVISTA DE LA FACULTAD DE CIENCIAS AGRARIAS																																1853-8665				DEC	2021	53	2
J	Pinkerton, J; Panay, N; Caetano, C; Seitz, C; Zuurman, L; Simon, JA				Pinkerton, Joann; Panay, Nicholas; Caetano, Cecilia; Seitz, Christian; Zuurman, Lineke; Simon, James A.			Design of OASIS-1 and-2: Phase 3 trials to assess the efficacy and safety of elinzanetant for the treatment of vasomotor symptoms related to menopause	MENOPAUSE-THE JOURNAL OF THE NORTH AMERICAN MENOPAUSE SOCIETY					Annual Meeting of the North-American-Menopause-Society	SEP 22-25, 2021	Washington, DC	N Amer Menopause Soc																							1072-3714	1530-0374				DEC	2021	28	12
J	Rhouma, A; Mougou, I; Bedjaoui, H; Rhouma, H; Matrood, AAA				Rhouma, Abdelhak; Mougou, Imen; Bedjaoui, Hanane; Rhouma, Hamza; Matrood, Abdulnabi Abbdul Ameer			Ecology in Chott Sidi Abdel Salam oasis, southeastern Tunisia: cultivated vegetation, fungal diversity and livestock population	JOURNAL OF COASTAL CONSERVATION																	Rhouma, Abdelhak/ABC-8472-2021	Rhouma, Abdelhak/0000-0001-6074-0076; , Abdulnabi/0000-0002-3474-2876													1400-0350	1874-7841				DEC	2021	25	6
J	Sanchez-Cuesta, FJ; Gonzalez-Zamorano, Y; Arroyo-Ferrer, A; Avellanal, M; Fernandez-Carnero, J; Romero, JP				Sanchez-Cuesta, Francisco Jose; Gonzalez-Zamorano, Yeray; Arroyo-Ferrer, Aida; Avellanal, Martin; Fernandez-Carnero, Josue; Romero, Juan Pablo			Transcranial Direct Current Stimulation (tDCS) Combined with Therapeutic Exercise and Cognitive Rehabilitation to Treat a Case of Burning Mouth Syndrome (BMS) Related Pain	APPLIED SCIENCES-BASEL																	Romero, Juan Pablo/Y-6765-2018	Romero, Juan Pablo/0000-0002-3190-1296; Sanchez Cuesta, Francisco Jose/0000-0001-6202-7071; Arroyo, Aida/0000-0001-8704-242X; FERNANDEZ-CARNERO, JOSUE/0000-0002-1314-624X														2076-3417				DEC	2021	11	23
J	Umugwaneza, A; Chen, X; Liu, T; Li, ZY; Uwamahoro, S; Mind'je, R; Umwali, ED; Ingabire, R; Uwineza, A				Umugwaneza, Adeline; Chen, Xi; Liu, Tie; Li, Zhengyang; Uwamahoro, Solange; Mind'je, Richard; Dufatanye Umwali, Edovia; Ingabire, Romaine; Uwineza, Aline			Future Climate Change Impact on the Nyabugogo Catchment Water Balance in Rwanda	WATER																	Mind'je, Richard/GNP-0081-2022	MIND'JE, RICHARD/0000-0003-4447-389X														2073-4441				DEC	2021	13	24
J	Uwamahoro, S; Liu, T; Nzabarinda, V; Habumugisha, JM; Habumugisha, T; Harerimana, B; Bao, AM				Uwamahoro, Solange; Liu, Tie; Nzabarinda, Vincent; Habumugisha, Jules Maurice; Habumugisha, Theogene; Harerimana, Barthelemy; Bao, Anming			Modifications to Snow-Melting and Flooding Processes in the Hydrological Model-A Case Study in Issyk-Kul, Kyrgyzstan	ATMOSPHERE																	NZABARINDA, Vincent/AAL-9994-2021; Harerimana, BARTHELEMY/ACV-3340-2022	NZABARINDA, Vincent/0000-0002-1591-1574; Harerimana, BARTHELEMY/0000-0001-8756-8413; UWAMAHORO, Solange/0000-0002-2515-7616; HABUMUGISHA, THEOGENE/0000-0002-1421-3168														2073-4433				DEC	2021	12	12
J	Wang, SS; Yu, Y; Zhang, XX; Lu, HY; Zhang, XY; Xu, ZW				Wang, Shushan; Yu, Yan; Zhang, Xiao-Xiao; Lu, Huayu; Zhang, Xiao-Ye; Xu, Zhiwei			Weakened dust activity over China and Mongolia from 2001 to 2020 associated with climate change and land-use management	ENVIRONMENTAL RESEARCH LETTERS																															1748-9326					DEC	2021	16	12
J	Wang, WZ; Xu, FA; Wang, JM				Wang, Weizhen; Xu, Feinan; Wang, Jiemin			Energy Exchange and Evapotranspiration over the Ejina Oasis Riparian Forest Ecosystem with Different Land-Cover Types	WATER																																2073-4441				DEC	2021	13	23
J	Wei, Y; Zhong, FL; Luo, XJ; Wang, PL; Song, XY				Wei, Yao; Zhong, Fanglei; Luo, Xijing; Wang, Penglong; Song, Xiaoyu			Ways to Improve the Productivity of Oasis Agriculture: Increasing the Scale of Household Production and Human Capital? A Case Study on Seed Maize Production in Northwest China	AGRICULTURE-BASEL																	Zhong, fanglei/AAC-8958-2021	Zhong, fanglei/0000-0003-0898-3331														2077-0472				DEC	2021	11	12
J	Xie, MJ; Luo, GP; Hellwich, O; Frankl, A; Zhang, WQ; Chen, CB; Zhang, C; De Maeyer, P				Xie, Mingjuan; Luo, Geping; Hellwich, Olaf; Frankl, Amaury; Zhang, Wenqiang; Chen, Chunbo; Zhang, Chen; De Maeyer, Philippe			Simulation of site-scale water fluxes in desert and natural oasis ecosystems of the arid region in Northwest China	HYDROLOGICAL PROCESSES																	Frankl, Amaury/J-5908-2012	Xie, Mingjuan/0000-0002-6656-4744													0885-6087	1099-1085				DEC	2021	35	12
J	Yaseen, M; Naseem, AA; Ahmad, J; Khan, A; Khan, A; Alamzeb, M; Ahmad, A; Saeed, U; Ahmad, A				Yaseen, Muhammad; Naseem, Abbas Ali; Ahmad, Jawad; Khan, Afrasiab; Khan, Abdullah; Alamzeb, Muhammad; Ahmad, Adnan; Saeed, Usman; Ahmad, Arsalan			Geological and Geomorphological Characteristics of Hingol National Park (HNP), Balochistan: a Geoheritage Candidate from Southern Pakistan	GEOHERITAGE																	Yaseen, Muhammad/G-4155-2019	Yaseen, Muhammad/0000-0002-0740-0635													1867-2477	1867-2485				DEC	2021	13	4
J	Sun, LX; Yu, Y; Gao, YT; Zhang, HY; Yu, X; He, J; Wang, DG; Malik, I; Wistuba, M; Yu, RD				Sun Lingxiao; Yu Yang; Gao Yuting; Zhang Haiyan; Yu Xiang; He Jing; Wang Dagang; Malik, Ireneusz; Wistuba, Malgorzata; Yu Ruide			Temporal and spatial variations of net primary productivity and its response to groundwater of a typical oasis in the Tarim Basin, China	JOURNAL OF ARID LAND																															1674-6767	2194-7783				NOV	2021	13	11
J	Mehda, S; Munoz-Martin, MA; Oustani, M; Hamdi-Aissa, B; Perona, E; Mateo, P				Mehda, Smail; Munoz-Martin, M. Angeles; Oustani, Mabrouka; Hamdi-Aissa, Baelhadj; Perona, Elvira; Mateo, Pilar			Lithic cyanobacterial communities in the polyextreme Sahara Desert: implications for the search for the limits of life	ENVIRONMENTAL MICROBIOLOGY																	Martín, M. Angeles Muñoz/G-8935-2013	Martín, M. Angeles Muñoz/0000-0003-1297-1595; Mateo Ortega, Pilar/0000-0003-1351-269X													1462-2912	1462-2920				JAN	2022	24	1
J	Myers, DC; Lawler, MJ; Mauldin, RL; Sjostedt, S; Dubey, M; Abbatt, J; Smith, JN				Myers, Deanna C.; Lawler, Michael J.; Mauldin, Roy L.; Sjostedt, Steven; Dubey, Manvendra; Abbatt, Jonathan; Smith, James N.			Indirect Measurements of the Composition of Ultrafine Particles in the Arctic Late-Winter	JOURNAL OF GEOPHYSICAL RESEARCH-ATMOSPHERES																	Dubey, Manvendra/E-3949-2010; Smith, James Norman/C-5614-2008	Dubey, Manvendra/0000-0002-3492-790X; Smith, James Norman/0000-0003-4677-8224; Abbatt, Jonathan/0000-0002-3372-334X; Lawler, Michael/0000-0003-0421-6629; Myers, Deanna/0000-0001-9883-7703													2169-897X	2169-8996				NOV 27	2021	126	22
J	Ashraf, GM; Chatzichronis, S; Alexiou, A; Kyriakopoulos, N; Alghamdi, BSA; Tayeb, HO; Alghamdi, JS; Khan, W; Jalal, MB; Atta, HM				Ashraf, Ghulam Md; Chatzichronis, Stylianos; Alexiou, Athanasios; Kyriakopoulos, Nikolaos; Alghamdi, Badrah Saeed Ali; Tayeb, Haythum Osama; Alghamdi, Jamaan Salem; Khan, Waseem; Jalal, Manal Ben; Atta, Hazem Mahmoud			BrainFD: Measuring the Intracranial Brain Volume With Fractal Dimension	FRONTIERS IN AGING NEUROSCIENCE																	Alghamdi, Jamaan/GLS-1530-2022; Alexiou, Athanasios/AAT-8491-2021; Alghamdi, Jamaan Salem/GLR-3477-2022; Ashraf, Ghulam Md/H-9485-2012; Tayeb, Haythum O./O-5260-2014	Alghamdi, Jamaan/0000-0002-5563-898X; Alexiou, Athanasios/0000-0002-2206-7236; Alghamdi, Jamaan Salem/0000-0002-5563-898X; Ashraf, Ghulam Md/0000-0002-9820-2078; Tayeb, Haythum O./0000-0002-9453-8463													1663-4365					NOV 26	2021	13
J	Farooq, S; Nazir, R; Ganai, BA; Mushtaq, H; Dar, GJ				Farooq, Saleem; Nazir, Ruqeya; Ganai, Bashir Ahmad; Mushtaq, Hina; Dar, Gulam Jeelani			Psychrophilic and psychrotrophic bacterial diversity of Himalayan Thajwas glacial soil, India	BIOLOGIA																	Nazir, Ruqeya/AAB-4956-2022; Rather, Saleem Farooq/HJZ-3562-2023	Dar, Gulam Jeelani/0000-0002-8784-1069; RATHER, SALEEM FAROOQ/0000-0001-5226-6212; , Ruqeya Nazir/0000-0002-1437-1895; Mushtaq, Hina/0000-0003-3549-2546													0006-3088	1336-9563				JAN	2022	77	1
J	Pham, QB; Pal, SC; Saha, A; Chowdhuri, I; Albanai, JA; Janizadeh, S; Ahmadi, K; Khedher, KM; Anh, DT; Duan, WL				Quoc Bao Pham; Pal, Subodh Chandra; Saha, Asish; Chowdhuri, Indrajit; Albanai, Jasem A.; Janizadeh, Saeid; Ahmadi, Koursoh; Khedher, Khaled Mohamed; Duong Tran Anh; Duan, Weili			Current and future projections of flood risk dynamics under seasonal precipitation regimes in the Hyrcanian Forest region	GEOCARTO INTERNATIONAL																	Pham, Quoc Bao/AAD-5611-2020; DUAN, Weili/A-1928-2019; Tran Anh, Duong/M-6789-2019	Pham, Quoc Bao/0000-0002-0468-5962; DUAN, Weili/0000-0002-1503-8066; Pal, Subodh Ch/0000-0003-0805-8007; Tran Anh, Duong/0000-0002-6775-0055													1010-6049	1752-0762
J	Abukhadra, MR; Eid, MH; El-Sherbeeny, AM; Abd Elgawad, AE; Shim, JJ				Abukhadra, Mostafa R.; Eid, Mohamed Hamdy; El-Sherbeeny, Ahmed M.; Abd Elgawad, Abd Elatty E.; Shim, Jae-Jin			Effective desalination of brackish groundwater using zeolitized diatomite/kaolinite geopolymer as low-cost inorganic membrane; Siwa Oasis in Egypt as a realistic case study	JOURNAL OF CONTAMINANT HYDROLOGY																	Abukhadra, Mostafa R./Q-3804-2018	Abukhadra, Mostafa R./0000-0001-5404-7996													0169-7722	1873-6009				JAN	2022	244
J	Tomar, S; Johns, N; Challa, S; Brooks, MI; Aliou, S; Abdoul-Moumouni, N; Raj, A; Silverman, J				Tomar, Shweta; Johns, Nicole; Challa, Sneha; Brooks, Mohamad, I; Aliou, Sani; Abdoul-Moumouni, Nouhou; Raj, Anita; Silverman, Jay			Associations of Age at Marriage With Marital Decision-Making Agency Among Adolescent Wives in Rural Niger	JOURNAL OF ADOLESCENT HEALTH																		Raj, Anita/0000-0002-8127-5123; NOUHOU, Abdoul Moumouni/0000-0002-8798-8693; Johns, Nicole/0000-0003-4513-4582; Tomar, Shweta/0000-0001-6991-1206													1054-139X	1879-1972				DEC	2021	69	6
J	Zemni, N; Slama, F; Bouksila, F; Bouhlila, R				Zemni, Nessrine; Slama, Fairouz; Bouksila, Fethi; Bouhlila, Rachida			Simulating and monitoring water flow, salinity distribution and yield production under buried diffuser irrigation for date palm tree in Saharan Jemna oasis (North Africa)	AGRICULTURE ECOSYSTEMS & ENVIRONMENT																	Slama, Fairouz/ABG-7020-2020	Slama, Fairouz/0000-0002-6479-1986; zemni, nessrine/0000-0002-0583-3429; Bouksila, Fethi/0000-0001-8751-9064													0167-8809	1873-2305				FEB 28	2022	325
J	Obda, I; El Kharim, Y; Bounab, A; Lahrach, A; Ahniche, M; Mansouri, H				Obda, Ilias; El Kharim, Younes; Bounab, Ali; Lahrach, Abderrahim; Ahniche, Mohammed; Mansouri, Hamou			Multi-criteria assessment approach of slow-moving urban landslide hazard: the case of Moulay Yacoub, Morocco	CANADIAN JOURNAL OF EARTH SCIENCES																	El Kharim, Younes/ABE-6291-2021; Bounab, Ali/ABC-6489-2021	El Kharim, Younes/0000-0001-9451-3955; Bounab, Ali/0000-0002-3411-3930													0008-4077	1480-3313				MAY	2022	59	5
J	Sharaf, MR; Husain, M; Rasool, KG; Tufail, M; Aldawood, AS				Sharaf, Mostafa R.; Husain, Mureed; Rasool, Khawaja Ghulam; Tufail, Muhammad; Aldawood, Abdulrahman S.			Taxonomy and distribution of termite fauna (Isoptera) in Riyadh Province, the Kingdom of Saudi Arabia, with an updated list of termite species on the Arabian Peninsula	SAUDI JOURNAL OF BIOLOGICAL SCIENCES																	Husain, Mureed/AAJ-6298-2020; Rasool, Khawaja Ghulam/GZK-3923-2022	Husain, Mureed/0000-0002-8207-7399													1319-562X	2213-7106				DEC	2021	28	12
J	Zhu, QK; Wang, YQ; Du, B; Yan, PK				Zhu, Qikui; Wang, Yanqing; Du, Bo; Yan, Pingkun			OASIS: One-pass aligned atlas set for medical image segmentation	NEUROCOMPUTING																	Zhu, Qikui/HHN-1681-2022	Zhu, Qikui/0000-0002-2779-4766													0925-2312	1872-8286				JAN 22	2022	470
J	Yu, HL; Zhao, XY; Huang, WD; Zhan, J; He, YZ				Yu, Hailun; Zhao, Xueyong; Huang, Wenda; Zhan, Jin; He, Yuanzheng			Drought Stress Influences the Growth and Physiological Characteristics of Solanum rostratum Dunal Seedlings From Different Geographical Populations in China	FRONTIERS IN PLANT SCIENCE																															1664-462X					NOV 16	2021	12
J	Esin, EV; Markevich, GN; Zlenko, DV; Shkil, FN				Esin, Evgeny V.; Markevich, Grigorii N.; Zlenko, Dmitriy V.; Shkil, Fedor N.			Thyroid-Mediated Metabolic Differences Underlie Ecological Specialization of Extremophile Salmonids in the Arctic Lake El'gygytgyn	FRONTIERS IN ECOLOGY AND EVOLUTION																	Zlenko, Dmitry/S-1658-2016	Zlenko, Dmitry/0000-0002-4126-3080; Shkil, Fedor/0000-0002-5637-8278													2296-701X					NOV 10	2021	9
J	Granja-Bruna, JL; Turu, V; Carrasco, RM; Munoz-Martin, A; Ros, X; Fernandez-Lozano, J; Soteres, RL; Karampaglidis, T; Lopez-Saez, JA; Pedraza, J				Granja-Bruna, Jose Luis; Turu, Valenti; Carrasco, Rosa M.; Munoz-Martin, Alfonso; Ros, Xavier; Fernandez-Lozano, Javier; Soteres, Rodrigo L.; Karampaglidis, Theodoros; Lopez-Saez, Jose Antonio; Pedraza, Javier			Geophysical characterization of the El Cervunal kame complex (Sierra de Gredos, Iberian Central System): Insight of infill geometry and reconstruction of former glacial formations	JOURNAL OF APPLIED GEOPHYSICS																	Turu, Valenti/J-3554-2018; Soteres, Rodrigo/HKN-4746-2023; Soteres, Rodrigo/GRJ-1904-2022; García, Rodrigo León Soteres/ABC-9649-2020; Carrasco Gonzalez, Rosa Maria/F-4973-2016; GRANJA-BRUNA, JOSE-LUIS/S-5675-2017; Munoz-Martin, Alfonso/L-5811-2014	Turu, Valenti/0000-0002-5087-2064; García, Rodrigo León Soteres/0000-0003-3647-5342; Carrasco Gonzalez, Rosa Maria/0000-0001-8762-6951; Karampaglidis, Theodoros/0000-0001-5626-4548; GRANJA-BRUNA, JOSE-LUIS/0000-0001-8741-5388; Munoz-Martin, Alfonso/0000-0002-5302-5119													0926-9851	1879-1859				DEC	2021	195
J	Choblet, G; Tobie, G; Buch, A; Cadek, O; Barge, LM; Behounkova, M; Camprubi, E; Freissinet, C; Hedman, M; Jones, G; Lainey, V; Le Gall, A; Lucchetti, A; MacKenzie, S; Mitri, G; Neveu, M; Nimmo, F; Olsson-Francis, K; Panning, M; Postberg, F; Saur, J; Schmidt, J; Sekine, Y; Shibuya, T; Sotin, C; Soucek, O; Szopa, C; Usui, T; Vance, S; Van Hoolst, T				Choblet, Gael; Tobie, Gabriel; Buch, Arnaud; Cadek, Ondrej; Barge, Laura M.; Behounkova, Marie; Camprubi, Eloi; Freissinet, Caroline; Hedman, Matt; Jones, Geraint; Lainey, Valery; Le Gall, Alice; Lucchetti, Alice; MacKenzie, Shannon; Mitri, Giuseppe; Neveu, Marc; Nimmo, Francis; Olsson-Francis, Karen; Panning, Mark; Postberg, Frank; Saur, Joachim; Schmidt, Juergen; Sekine, Yasuhito; Shibuya, Taka…			Enceladus as a potential oasis for life: Science goals and investigations for future explorations	EXPERIMENTAL ASTRONOMY																	Panning, Mark P/B-3805-2011; UzK, IGMK/HGU-4003-2022; Souček, Ondřej/K-3466-2017; Behounkova, Marie/C-7839-2013; LUCCHETTI, Alice/CAH-0607-2022	Panning, Mark P/0000-0002-2041-3190; Souček, Ondřej/0000-0002-6515-5420; Behounkova, Marie/0000-0001-8227-0685; LUCCHETTI, Alice/0000-0001-7413-3058; Saur, Joachim/0000-0003-1413-1231; Jones, Geraint/0000-0002-5859-1136; Shibuya, Takazo/0000-0002-1289-1328; Van Hoolst, Tim/0000-0002-9820-8584													0922-6435	1572-9508
J	Yokoyama, G; Yasutake, D; Wang, WZ; Wu, YR; Feng, JJ; Dong, LL; Kimura, K; Marui, A; Hirota, T; Kitano, M; Mori, M				Yokoyama, Gaku; Yasutake, Daisuke; Wang, Weizhen; Wu, Yueru; Feng, Jiaojiao; Dong, Leilei; Kimura, Kensuke; Marui, Atsushi; Hirota, Tomoyoshi; Kitano, Masaharu; Mori, Makito			Limiting factor of dew formation changes seasonally in a semiarid crop field of northwest China	AGRICULTURAL AND FOREST METEOROLOGY																		Kimura, Kensuke/0000-0002-6864-1563; Yokoyama, Gaku/0000-0002-7636-4471													0168-1923	1873-2240				DEC 15	2021	311
J	Yue, P; Zuo, XA; Li, KH; Li, XY; Wang, SK; Misselbrook, T				Yue, Ping; Zuo, Xiaoan; Li, Kaihui; Li, Xiangyun; Wang, Shaokun; Misselbrook, Tom			No significant change noted in annual nitrous oxide flux under precipitation changes in a temperate desert steppe	LAND DEGRADATION & DEVELOPMENT																	岳, 平/GWC-4881-2022; Misselbrook, Tom/N-2385-2014	Misselbrook, Tom/0000-0002-4594-3606													1085-3278	1099-145X				JAN 15	2022	33	1
J	Akhigbe, RE; Ajayi, AF; Ram, SK				Akhigbe, Roland E.; Ajayi, Ayodeji F.; Ram, Sahu K.			Oxidative Stress and Cardiometabolic Disorders	BIOMED RESEARCH INTERNATIONAL																		Ajayi, Ayodeji/0000-0002-0992-1653; Akhigbe, Roland/0000-0002-3874-5927													2314-6133	2314-6141				NOV 5	2021	2021
J	Achag, B; Mouhanni, H; Bendou, A				Achag, Badre; Mouhanni, Hind; Bendou, Abdelaziz			Design and performance analysis of a renewable pumping system for treated wastewater to reuse in the Moroccan desert	JOURNAL OF WATER AND CLIMATE CHANGE																		Achag, Badre/0000-0001-6294-1939													2040-2244	2408-9354				DEC	2021	12	8
J	Zhang, ZH; Chai, XT; Tariq, A; Zeng, FJ; Li, XY; Graciano, C				Zhang, Zhihao; Chai, Xutian; Tariq, Akash; Zeng, Fanjiang; Li, Xiangyi; Graciano, Corina			Intercropping Systems Modify Desert Plant-Associated Microbial Communities and Weaken Host Effects in a Hyper-Arid Desert	FRONTIERS IN MICROBIOLOGY																		Graciano, Corina/0000-0003-0803-4128														1664-302X				NOV 3	2021	12
J	Anglada, E; Boto, F; de Cortazar, MG; Garmendia, I				Anglada, Eva; Boto, Fernando; Garcia de Cortazar, Maider; Garmendia, Inaki			Metamodels' Development for High Pressure Die Casting of Aluminum Alloy	METALS																	Anglada, Eva/B-8487-2008	Anglada, Eva/0000-0002-9824-418X; GARMENDIA AZURMENDI, INAKI/0000-0001-7293-8960; Boto, PhD Fernando/0000-0003-2706-3637														2075-4701				NOV	2021	11	11
J	Bossard, M; Gao, P; Boden, W; Steg, G; Tanguay, JF; Joyner, C; Granger, CB; Kastrati, A; Faxon, D; Budaj, A; Pais, P; Di Pasquale, G; Valentin, V; Flather, M; Moccetti, T; Yusuf, S; Mehta, SR				Bossard, Matthias; Gao, Peggy; Boden, William; Steg, Gabriel; Tanguay, Jean-Francois; Joyner, Cam; Granger, Christopher B.; Kastrati, Adnan; Faxon, David; Budaj, Andrzej; Pais, Prem; Di Pasquale, Giuseppe; Valentin, Vicent; Flather, Marcus; Moccetti, Tiziano; Yusuf, Salim; Mehta, Shamir R.			Antiplatelet therapy in patients with myocardial infarction without obstructive coronary artery disease	HEART																		Budaj, Andrzej/0000-0002-6395-2098; Yusuf, Salim/0000-0003-4776-5601													1355-6037	1468-201X				NOV	2021	107	21
J	Dhaouadi, L; Besser, H; Karbout, N; Al-Omran, A; Wassar, F; Wahba, MS; Yaohu, K; Hamed, Y				Dhaouadi, Latifa; Besser, Houda; Karbout, Nissaf; Al-Omran, Abdulrasoul; Wassar, Fatma; Wahba, Mohamed Shahata; Yaohu, Kang; Hamed, Younes			Irrigation water management for sustainable cultivation of date palm	APPLIED WATER SCIENCE																	Hamed, Younes/ABC-6660-2021														2190-5487	2190-5495				NOV	2021	11	11
J	El-Sattar, HA; Kamel, S; Sultan, H; Tostado-Veliz, M; Eltamaly, AM; Jurado, F				El-Sattar, Hoda Abd; Kamel, Salah; Sultan, Hamdy; Tostado-Veliz, Marcos; Eltamaly, Ali M.; Jurado, Francisco			Performance Analysis of a Stand-Alone PV/WT/Biomass/Bat System in Alrashda Village in Egypt	APPLIED SCIENCES-BASEL																	Eltamaly, Ali M/E-6486-2016; Tostado-Véliz, Marcos/ABE-9027-2021; El-Sattar, Hoda Abd/CAA-5899-2022; Jurado, Francisco/F-7546-2011	Eltamaly, Ali M/0000-0002-9831-7182; Kamel, Salah/0000-0001-9505-5386; Jurado, Francisco/0000-0001-8122-7415; Abd El-Sattar, Hoda/0000-0002-8945-5225; Tostado-Veliz, Marcos/0000-0001-7076-1065														2076-3417				NOV	2021	11	21
J	Fu, S; Li, HF				Fu, Shuai; Li, Haifeng			Effects of drought stress on water consumption of poplar trees in an oasis shelterbelt of the Northwest China	INTERNATIONAL JOURNAL OF AGRICULTURAL AND BIOLOGICAL ENGINEERING																															1934-6344	1934-6352				NOV	2021	14	6
J	Guan, JY; Yao, JQ; Li, MY; Zheng, JH				Guan, Jingyun; Yao, Junqiang; Li, Moyan; Zheng, Jianghua			Assessing the Spatiotemporal Evolution of Anthropogenic Impacts on Remotely Sensed Vegetation Dynamics in Xinjiang, China	REMOTE SENSING																	Yao, Junqiang/O-7681-2019	Yao, Junqiang/0000-0002-2700-0700; Guan, Jingyun/0000-0002-9701-071X														2072-4292				NOV	2021	13	22
J	Gupta, P				Gupta, Pratibha			First report of diversity of Cyanobacteria of Broknes Peninsula of Larsemann Hills, East Antarctica	CRYPTOGAMIE ALGOLOGIE																	Gupta, Pratibha/HKO-2334-2023														0181-1568	1776-0984				NOV	2021	42	15
J	Hamza, F; Kahli, A; Chokri, MA; Almalki, M; Hanane, S				Hamza, Foued; Kahli, Asma; Chokri, Mohamed-Ali; Almalki, Mohammed; Hanane, Saad			Urban and industrial landscapes interact with microhabitat to predict occurrence of European Turtle Dove (Streptopelia turtur) in Mediterranean oases: Implications for conservation	LANDSCAPE AND URBAN PLANNING																															0169-2046	1872-6062				NOV	2021	215
J	Heliker, BD; Kenton, K; Leader-Cramer, A; Brown, O; Bochenska, K; Geynisman-Tan, J; Mueller, M; Lewicky-Gaupp, C				Heliker, Bhumy Dave; Kenton, Kimberly; Leader-Cramer, Alix; Brown, Oluwateniola; Bochenska, Katarzyna; Geynisman-Tan, Julia; Mueller, Margaret; Lewicky-Gaupp, Christina			Adding Insult to Injury: Levator Ani Avulsion in Women With Obstetric Anal Sphincter Injuries	OBSTETRICAL & GYNECOLOGICAL SURVEY																															0029-7828	1533-9866				NOV	2021	76	11
J	Huang, FR; Feng, T; Guo, ZK; Li, LH				Huang, Farong; Feng, Ting; Guo, Zengkun; Li, Lanhai			Impact of Winter Snowfall on Vegetation Greenness in Central Asia	REMOTE SENSING																	Li, Lanhai/AAE-9967-2020	li, lan hai/0000-0003-4573-6284; Guo, Zengkun/0000-0002-5228-3706														2072-4292				NOV	2021	13	21
J	Jiang, L; Wen, ZB; Zhang, YL; Zhao, ZY; Tanveer, M; Tian, CY; Wang, L				Jiang, Li; Wen, Zhibin; Zhang, Yunling; Zhao, Zhenyong; Tanveer, Mohsin; Tian, Changyan; Wang, Lei			Transgenerational Effects of Maternal Water Condition on the Growth, C:N Stoichiometry and Seed Characteristics of the Desert Annual Atriplex aucheri	PLANTS-BASEL																		Tanveer, Mohsin/0000-0003-4560-6439; WANG, Lei/0000-0002-8253-7295														2223-7747				NOV	2021	10	11
J	Li, HW; Li, Z; Chen, YN; Xiang, YY; Liu, YC; Kayumba, PM; Li, XY				Li, Hongwei; Li, Zhi; Chen, Yaning; Xiang, Yanyun; Liu, Yongchang; Kayumba, Patient Mindje; Li, Xiaoyang			Drylands face potential threat of robust drought in the CMIP6 SSPs scenarios	ENVIRONMENTAL RESEARCH LETTERS																															1748-9326					NOV	2021	16	11
J	Li, HW; Li, Z; Chen, YN; Liu, YC; Hu, YA; Sun, F; Kayumba, PM				Li, Hongwei; Li, Zhi; Chen, Yaning; Liu, Yongchang; Hu, Yanan; Sun, Fan; Kayumba, Patient Mindje			Projected Meteorological Drought over Asian Drylands under Different CMIP6 Scenarios	REMOTE SENSING																		sun, fan/0000-0002-8586-1795														2072-4292				NOV	2021	13	21
J	Liu, Y; Xiao, WJ; Windley, BF; Zhou, KF; Li, RS; Zhan, MG; Sang, M; Yang, H; Jia, XL; Chen, YC; Ji, WH; Ao, SJ				Liu, Yin; Xiao, Wenjiao; Windley, Brian F.; Zhou, Kefa; Li, Rongshe; Zhan, Mingguo; Sang, Miao; Yang, He; Jia, Xiaoliang; Chen, Yichao; Ji, Wenhua; Ao, Songjian			Three stages of arc migration in the Carboniferous-Triassic in northern Qiangtang, central Tibet, China: Ridge subduction and asynchronous slab rollback of the Jinsha Paleotethys	GEOLOGICAL SOCIETY OF AMERICA BULLETIN																	Yang, He/I-7844-2017; Ao, Songjian/M-1710-2017; Xiao (肖文交), Wenjiao/GPT-2503-2022; Ao, Songjian/R-1949-2019; Xiao, Wenjiao/A-2762-2010	Yang, He/0000-0002-4666-8896; Ao, Songjian/0000-0003-0118-6997; Ao, Songjian/0000-0003-0118-6997; Xiao (xiao wen jiao), Wenjiao/0000-0003-3518-0526													0016-7606	1943-2674				NOV-DEC	2021	133	11-12
J	Mohammed, BA; Senan, EM; Rassem, TH; Makbol, NM; Alanazi, AA; Al-Mekhlafi, ZG; Almurayziq, TS; Ghaleb, FA				Mohammed, Badiea Abdulkarem; Senan, Ebrahim Mohammed; Rassem, Taha H.; Makbol, Nasrin M.; Alanazi, Adwan Alownie; Al-Mekhlafi, Zeyad Ghaleb; Almurayziq, Tariq S.; Ghaleb, Fuad A.			Multi-Method Analysis of Medical Records and MRI Images for Early Diagnosis of Dementia and Alzheimer's Disease Based on Deep Learning and Hybrid Methods	ELECTRONICS																	Senan, Ebrahim Mohammed/ACL-1016-2022; Almurayziq, Tariq S/ABO-6099-2022; Mohammed, Badiea Abdulkarem/ABD-6940-2020; Al-Mekhlafi, Zeyad Ghaleb/D-4108-2014	Senan, Ebrahim Mohammed/0000-0002-7508-7601; Almurayziq, Tariq S/0000-0003-3695-3375; Mohammed, Badiea Abdulkarem/0000-0003-3539-4161; Al-Mekhlafi, Zeyad Ghaleb/0000-0001-6367-0309; Ghaleb, Fuad Abdulgaleel Abdoh/0000-0002-1468-0655; rassem, taha/0000-0001-6259-0622; Makbol, Nasrin/0000-0002-9677-3862														2079-9292				NOV	2021	10	22
J	Morais, R; Siqueira, A; Smallhorn-West, P; Bellwood, D				Morais, Renato; Siqueira, Alexandre; Smallhorn-West, Patrick; Bellwood, David			Spatial subsidies drive sweet spots of tropical marine biomass production	PLOS BIOLOGY																	Siqueira, Alexandre C./AAJ-5987-2020; Araujo, Renato Morais/AAA-7903-2021	Siqueira, Alexandre C./0000-0001-7970-4024; Araujo, Renato Morais/0000-0003-4652-6676													1544-9173	1545-7885				NOV	2021	19	11
J	Mouloudi, M; Radouani, R; Essahli, M; Chafi, M; Chhiba, M				Mouloudi, Meriyem; Radouani, Rachid; Essahli, Mohamed; Chafi, Mohammed; Chhiba, Mostafa			Study of Corrosion Pit Propagation in Aluminum by Numerical Simulation using the Finite Element Method	INTERNATIONAL JOURNAL OF ELECTROCHEMICAL SCIENCE																	CHAFI, Mohammed/GYU-5504-2022	CHAFI, Mohammed/0000-0002-4325-3206													1452-3981					NOV	2021	16	11
J	Odinaev, I; Gulakhmadov, A; Murzin, P; Tavlintsev, A; Semenenko, S; Kokorin, E; Safaraliev, M; Chen, X				Odinaev, Ismoil; Gulakhmadov, Aminjon; Murzin, Pavel; Tavlintsev, Alexander; Semenenko, Sergey; Kokorin, Evgenii; Safaraliev, Murodbek; Chen, Xi			Comparison of Mathematical Methods for Compensating a Current Signal under Current Transformers Saturation Conditions	SENSORS																	Safaraliev, Murodbek/AAG-6805-2019; Odinaev, Ismoil/HKV-9911-2023; Tavlintsev, Alexander/E-8566-2014	Safaraliev, Murodbek/0000-0003-3433-9742; Odinaev, Ismoil/0000-0003-2434-1929; Tavlintsev, Alexander/0000-0003-0592-845X; Evgenii, Kokorin/0000-0002-6317-5911; Gulakhmadov, Aminjon/0000-0002-2366-2491; Semenenko, Sergey/0000-0001-9813-9067														1424-8220				NOV	2021	21	21
J	Rizvi, S; Rustum, R; Giustolisi, O; Wright, G; Arthur, S; Berardi, L				Rizvi, Syed; Rustum, Rabee; Giustolisi, Orazio; Wright, Grant; Arthur, Scott; Berardi, Luigi			Effects of Orifice Diameter and Retention Time of Local Tanks on the Reliability and Carbon Footprint of Water Distribution Networks	JOURNAL OF WATER RESOURCES PLANNING AND MANAGEMENT																		Rustum, Rabee/0000-0001-6938-8144; Wright, Grant/0000-0003-3241-1456; Rizvi, Syed Abbas Hussain/0000-0002-9609-6080													0733-9496	1943-5452				NOV 1	2021	147	11
J	Selmy, SAH; Abd Al-Aziz, SH; Jimenez-Ballesta, R; Garcia-Navarro, FJ; Fadl, ME				Selmy, Salman A. H.; Abd Al-Aziz, Salah H.; Jimenez-Ballesta, Raimundo; Garcia-Navarro, Francisco Jesus; Fadl, Mohamed E.			Modeling and Assessing Potential Soil Erosion Hazards Using USLE and Wind Erosion Models in Integration with GIS Techniques: Dakhla Oasis, Egypt	AGRICULTURE-BASEL																	Selmy, Salman/CAA-2634-2022; Navarro, Francisco Jesus Garcia/GPK-0684-2022; Fadl, Mohamed/U-3327-2019; Jimenez Ballesta, Raimundo/AAL-7263-2021	Selmy, Salman/0000-0001-9217-8938; Navarro, Francisco Jesus Garcia/0000-0003-3162-3182; Fadl, Mohamed/0000-0002-3600-8237; Jimenez Ballesta, Raimundo/0000-0002-4048-0892														2077-0472				NOV	2021	11	11
J	Yin, ZR; Kuang, WH; Bao, YH; Dou, YY; Chi, WF; Ochege, FU; Pan, T				Yin, Zherui; Kuang, Wenhui; Bao, Yuhai; Dou, Yinyin; Chi, Wenfeng; Ochege, Friday Uchenna; Pan, Tao			Evaluating the Dynamic Changes of Urban Land and Its Fractional Covers in Africa from 2000-2020 Using Time Series of Remotely Sensed Images on the Big Data Platform	REMOTE SENSING																	Ochege, Friday Uchenna/AAF-6958-2021	Ochege, Friday Uchenna/0000-0002-6661-0966; Dou, Yinyin/0000-0002-0119-1473; pan, tao/0000-0003-4818-2379														2072-4292				NOV	2021	13	21
J	Desneux, N; Han, P; Mansour, R; Arno, J; Brevault, T; Campos, MR; Chailleux, A; Guedes, RNC; Karimi, J; Konan, KAJ; Lavoir, AV; Luna, MG; Perez-Hedo, M; Urbaneja, A; Verheggen, FJ; Zappala, L; Abbes, K; Ali, A; Bayram, Y; Cantor, F; Cuthbertson, AGS; De Vis, R; Erler, F; Firake, DM; Haddi, K; Hajjar, MJ; Ismoilov, K; Jaworski, CC; Kenis, M; Liu, HT; Madadi, H; Martin, T; Mazih, A; Messelink, GJ; …				Desneux, Nicolas; Han, Peng; Mansour, Ramzi; Arno, Judit; Brevault, Thierry; Campos, Mateus R.; Chailleux, Anais; Guedes, Raul N. C.; Karimi, Javad; Konan, Kouassi Arthur J.; Lavoir, Anne-violette; Luna, Maria G.; Perez-Hedo, Meritxell; Urbaneja, Alberto; Verheggen, Francois J.; Zappala, Lucia; Abbes, Khaled; Ali, Abid; Bayram, Yunus; Cantor, Fernando; Cuthbertson, Andrew G. S.; De Vis, Raf; Erle…			Integrated pest management of Tuta absoluta: practical implementations across different world regions	JOURNAL OF PEST SCIENCE																	Guedes, Raul Narciso Carvalho/L-3924-2013; Urbaneja, Alberto/C-9071-2011; Perez-Hedo, Meritxell/O-6441-2019; Ismoilov, Khasan/HKV-1011-2023; Campos, Mateus Ribeiro de/G-9828-2012; ARNO, JUDIT/I-7045-2012; Brévault, Thierry/AAV-5990-2021; Desneux, Nicolas/J-6262-2013; Ali, Abid/S-7218-2019; BIONDI, Antonio/I-6381-2012; Haddi, Khalid/K-6387-2018; PR, Shashank/A-2724-2016; Ricupero, Michele/G-9936-2…	Guedes, Raul Narciso Carvalho/0000-0001-6229-7549; Urbaneja, Alberto/0000-0001-5986-3685; Perez-Hedo, Meritxell/0000-0003-3411-0761; Campos, Mateus Ribeiro de/0000-0001-9317-3215; ARNO, JUDIT/0000-0001-6318-6867; Brévault, Thierry/0000-0003-0159-3509; Ali, Abid/0000-0003-3674-7811; BIONDI, Antonio/0000-0002-1982-7716; Haddi, Khalid/0000-0002-2655-4365; PR, Shashank/0000-0002-8177-6091; Ricupero, …													1612-4758	1612-4766				JAN	2022	95	1
J	Najid, N; Fellaou, S; Kouzbour, S; Gourich, B; Ruiz-Garcia, A				Najid, Noura; Fellaou, Soukaina; Kouzbour, Sanaa; Gourich, Bouchaib; Ruiz-Garcia, Alejandro			Energy and environmental issues of seawater reverse osmosis desalination considering boron rejection: A comprehensive review and a case study of exergy analysis	PROCESS SAFETY AND ENVIRONMENTAL PROTECTION																	Ruiz-García, Alejandro/M-3697-2014	Ruiz-García, Alejandro/0000-0002-5209-653X; soukaina, fellaou/0000-0003-0765-4747													0957-5820	1744-3598				DEC	2021	156
J	Bhadriraju, B; Kwon, JSI; Khan, F				Bhadriraju, Bhavana; Kwon, Joseph Sang-Il; Khan, Faisal			OASIS-P: Operable Adaptive Sparse Identification of Systems for fault Prognosis of chemical processes	JOURNAL OF PROCESS CONTROL																															0959-1524	1873-2771				NOV	2021	107
J	Moyo, B; Tavengwa, NT				Moyo, Babra; Tavengwa, Nikita T.			Critical review of solid phase extraction for multiresidue clean-up and pre-concentration of antibiotics from livestock and poultry manure	FOOD ADDITIVES AND CONTAMINANTS PART A-CHEMISTRY ANALYSIS CONTROL EXPOSURE & RISK ASSESSMENT																		Sekgota Nemphagane, Wendy Maphefo/0000-0002-3113-7275													1944-0049	1944-0057				FEB 1	2022	39	2
J	Mir-Makhamad, B; Mirzaakhmedov, S; Rahmonov, H; Stark, S; Omel'chenko, A; Spengler, RN				Mir-Makhamad, Basira; Mirzaakhmedov, Sirojidin; Rahmonov, Husniddin; Stark, Soren; Omel'chenko, Andrey; Spengler, Robert N., III			Qarakhanids on the Edge of the Bukhara Oasis: Archaeobotany of Medieval Paykend	ECONOMIC BOTANY																		Mir-Makhamad, Basira/0000-0002-1414-0392													0013-0001	1874-9364				DEC	2021	75	3-4
J	Serazin, G; Di Luca, A; Sen Gupta, A; Roge, M; Jourdain, NC; Argueso, D; Bull, CYS				Serazin, G.; Di Luca, A.; Sen Gupta, A.; Roge, M.; Jourdain, N. C.; Argueso, D.; Bull, C. Y. S.			East Australian Cyclones and Air-Sea Feedbacks	JOURNAL OF GEOPHYSICAL RESEARCH-ATMOSPHERES																	Argüeso, Daniel/G-1970-2012; Sen Gupta, Alexander/B-7995-2011; Jourdain, Nicolas/B-6899-2015	Argüeso, Daniel/0000-0002-4792-162X; SERAZIN, Guillaume/0000-0002-7069-5886; Sen Gupta, Alexander/0000-0001-5226-871X; Jourdain, Nicolas/0000-0002-1372-2235; Bull, Christopher/0000-0001-8362-3446													2169-897X	2169-8996				OCT 27	2021	126	20
J	Guan, JY; Li, MY; Ju, XF; Lin, J; Wu, JG; Zheng, JH				Guan, Jingyun; Li, Moyan; Ju, Xifeng; Lin, Jun; Wu, Jianguo; Zheng, Jianghua			The potential habitat of desert locusts is contracting: predictions under climate change scenarios	PEERJ																		Guan, Jingyun/0000-0002-9701-071X													2167-8359					OCT 26	2021	9
J	Lukashanets, DA; Convey, P; Borodin, OI; Miamin, VY; Hihiniak, YH; Gaydashov, AA; Yatsyna, AP; Vezhnavets, VV; Maysak, NN; Shendrik, TV				Lukashanets, Dzmitry A.; Convey, Peter; Borodin, Oleg, I; Miamin, Vladislav Ye; Hihiniak, Yury H.; Gaydashov, Alexey A.; Yatsyna, Aleksander P.; Vezhnavets, Vasil V.; Maysak, Natallia N.; Shendrik, Tatyana, V			Eukarya biodiversity in the Thala Hills, East Antarctica	ANTARCTIC SCIENCE																		Maisak, Natallia/0000-0001-8872-1141; Borodin, Oleg/0000-0001-8907-2139; Vezhnavets, Vasil/0000-0001-9878-5448; Gaidashov, Aleksei/0000-0001-6787-0666													0954-1020	1365-2079				DEC	2021	33	6
J	Tenza-Peral, A; Perez-Ibarra, I; Breceda, A; Martinez-Fernandez, J; Gimenez, A				Tenza-Peral, A.; Perez-Ibarra, I.; Breceda, A.; Martinez-Fernandez, J.; Gimenez, A.			Can local policy options reverse the decline process of small and marginalized rural areas influenced by global change?	ENVIRONMENTAL SCIENCE & POLICY																	Peral, Alicia Tenza/R-6198-2017; Martinez-Fernandez, Julia/J-9681-2012; Gimenez Casalduero, Andres/H-4354-2015	Peral, Alicia Tenza/0000-0001-5756-2715; Martinez-Fernandez, Julia/0000-0001-8675-947X; Gimenez Casalduero, Andres/0000-0002-5248-9819													1462-9011	1873-6416				JAN	2022	127
J	Pascual-Caro, S; Borrull, F; Aguilar, C; Calull, M				Pascual-Caro, Sergi; Borrull, Francesc; Aguilar, Carme; Calull, Marta			Comparison of different chiral selectors for the enantiomeric determination of amphetamine-type substances in human urine by solid-phase extraction followed by capillary electrophoresis-tandem mass spectrometry	ELECTROPHORESIS																	; Calull, Marta/L-7576-2014; Aguilar, Carme/K-8997-2014	Pascual-Caro, Sergi/0000-0001-8890-5100; Calull, Marta/0000-0002-5258-1949; Aguilar, Carme/0000-0002-5913-2599													0173-0835	1522-2683				FEB	2022	43	3
J	Fenetahun, Y; Yuan, Y; Fentahun, T; Xu, XW; Wang, YD				Fenetahun, Yeneayehu; Yuan You; Fentahun, Tihunie; Xu Xinwen; Wang Yong-dong			Effects of grazing intensity on forage nutritive value of dominant grass species in Borana rangelands of Southern	PEERJ																															2167-8359					OCT 21	2021	9
J	Sharpe, JD; Guest, JL; Siegler, AJ; Sanchez, TH; Sullivan, PS				Sharpe, J. Danielle; Guest, Jodie L.; Siegler, Aaron J.; Sanchez, Travis H.; Sullivan, Patrick S.			The spatiotemporal distribution of pre-exposure prophylaxis accessibility in the United States, 2016-2020	ANNALS OF EPIDEMIOLOGY																	; Sullivan, Patrick Sean/AAX-4604-2021	Siegler, Aaron/0000-0001-5553-7540; Sharpe, J. Danielle/0000-0003-1898-6202; Sullivan, Patrick Sean/0000-0002-7728-0587													1047-2797	1873-2585				DEC	2021	64
J	Lei, ZY; Wang, H; Wright, IJ; Zhu, XG; Niinemets, U; Li, ZL; Sun, DS; Dong, N; Zhang, WF; Zhou, ZL; Liu, F; Zhang, YL				Lei, Zhang-Ying; Wang, Heng; Wright, Ian J.; Zhu, Xin-Guang; Niinemets, Ulo; Li, Zi-Liang; Sun, Dong-Sheng; Dong, Ning; Zhang, Wang-Feng; Zhou, Zhong-Li; Liu, Fang; Zhang, Ya-Li			Enhanced photosynthetic nitrogen use efficiency and increased nitrogen allocation to photosynthetic machinery under cotton domestication	PHOTOSYNTHESIS RESEARCH																	Niinemets, Ülo/A-3816-2008; Wright, Ian/G-4979-2012	Niinemets, Ülo/0000-0002-3078-2192; Wright, Ian/0000-0001-8338-9143													0166-8595	1573-5079				DEC	2021	150	1-3
J	Al-Ashqar, SF; Seiffert, ER; de Vries, D; El-Sayed, S; Antar, MS; Sallam, HM				Al-Ashqar, Shorouq F.; Seiffert, Erik R.; de Vries, Dorien; El-Sayed, Sanaa; Antar, Mohamed S.; Sallam, Hesham M.			New phiocricetomyine rodents (Hystricognathi) from the Jebel Qatrani	PEERJ																	Sallam, Hesham/T-6534-2018	Seiffert, Erik/0000-0001-5948-9224; Sallam, Hesham/0000-0001-6584-6312; de Vries, Dorien/0000-0002-6809-0052													2167-8359					OCT 19	2021	9
J	Dhaouadi, L; Besser, H; Karbout, N; Khaldi, R; Haj-Amor, Z; Maachia, S; Ouassar, F				Dhaouadi, Latifa; Besser, Houda; Karbout, Nissaf; Khaldi, Rabeb; Haj-Amor, Zied; Maachia, Sihem; Ouassar, Fatma			Environmental sensitivity and risk assessment in the Saharan Tunisian oasis agro-systems using the deepest water table source for irrigation: water quality and land management impacts	ENVIRONMENT DEVELOPMENT AND SUSTAINABILITY																															1387-585X	1573-2975				SEP	2022	24	9
J	Pervaiz, S; Kannan, S; Anwar, S; Huo, DH				Pervaiz, Salman; Kannan, Sathish; Anwar, Saqib; Huo, Dehong			Machinability analysis of dry and liquid nitrogen-based cryogenic cutting of Inconel 718: experimental and FE analysis	INTERNATIONAL JOURNAL OF ADVANCED MANUFACTURING TECHNOLOGY																	Anwar, Saqib/J-8433-2019; Pervaiz, Salman/E-5069-2017	Anwar, Saqib/0000-0003-2657-163X; Pervaiz, Salman/0000-0002-2425-5441; Huo, Dehong/0000-0002-0256-4227													0268-3768	1433-3015				FEB	2022	118	11-12
J	Yue, P; Zuo, XA; Li, KH; Li, XY; Wang, SK; Ma, XJ; Qu, H; Chen, M; Liu, LX; Misselbrook, T; Yu, Q				Yue, Ping; Zuo, Xiaoan; Li, Kaihui; Li, Xiangyun; Wang, Shaokun; Ma, Xujun; Qu, Hao; Chen, Min; Liu, Liangxu; Misselbrook, Tom; Yu, Qiang			Responses of ecosystem respiration, methane uptake and nitrous oxide emission to drought in a temperate desert steppe	PLANT AND SOIL																	Yu, Qiang/E-2097-2011; 岳, 平/GWC-4881-2022; Misselbrook, Tom/N-2385-2014	Yu, Qiang/0000-0002-5480-0623; Misselbrook, Tom/0000-0002-4594-3606													0032-079X	1573-5036				DEC	2021	469	1-2
J	Bozorov, TA; Toshmatov, ZO; Kahar, G; Zhang, DY; Shao, H; Gafforov, Y				Bozorov, Tohir A.; Toshmatov, Zokir O.; Kahar, Gulnaz; Zhang, Daoyuan; Shao, Hua; Gafforov, Yusufjon			Wild Apple-Associated Fungi and Bacteria Compete to Colonize the Larval Gut of an Invasive Wood-Borer Agrilus mali in Tianshan Forests	FRONTIERS IN MICROBIOLOGY																	Bozorov, Tohir/G-3447-2015; Bozorov, Tohir/AAF-5244-2021; Gafforov, Yusufjon/C-5507-2015; Toshmatov, Zokir/AAD-4437-2022	Bozorov, Tohir/0000-0002-8925-6533; Bozorov, Tohir/0000-0002-8925-6533; Gafforov, Yusufjon/0000-0003-3076-4709;														1664-302X				OCT 15	2021	12
J	Jiang, L; Wu, XN; Zhao, ZY; Zhang, K; Tanveer, M; Wang, L; Huang, JF; Tian, CY; Wang, L				Jiang, Li; Wu, Xianjin; Zhao, Zhenyong; Zhang, Ke; Tanveer, Mohsin; Wang, Li; Huang, Jingfeng; Tian, Changyan; Wang, Lei			Luobuma (Apocynum) - Cash crops for saline lands	INDUSTRIAL CROPS AND PRODUCTS																	Tanveer, Mohsin/I-2577-2019	Tanveer, Mohsin/0000-0003-4560-6439; WANG, Lei/0000-0002-8253-7295													0926-6690	1872-633X				DEC 1	2021	173
J	Yin, H; Zheng, HW; Zhang, B; Tariq, A; Lv, GH; Zeng, FJ; Graciano, C				Yin, Hui; Zheng, Hongwei; Zhang, Bo; Tariq, Akash; Lv, Guanghui; Zeng, Fanjiang; Graciano, Corina			Stoichiometry of C:N:P in the Roots of Alhagi sparsifolia Is More Sensitive to Soil Nutrients Than Aboveground Organs	FRONTIERS IN PLANT SCIENCE																		Zhang, Bo/0000-0001-8065-1273; Graciano, Corina/0000-0003-0803-4128													1664-462X					OCT 12	2021	12
J	Singhania, U; Tripathy, B; Hasan, MK; Anumbe, NC; Alboaneen, D; Ahmed, FRA; Ahmed, TE; Nour, MMM				Singhania, Udit; Tripathy, Balakrushna; Hasan, Mohammad Kamrul; Anumbe, Noble C.; Alboaneen, Dabiah; Ahmed, Fatima Rayan Awad; Ahmed, Thowiba E.; Nour, Manasik M. Mohamed			A Predictive and Preventive Model for Onset of Alzheimer's Disease	FRONTIERS IN PUBLIC HEALTH																	Anumbe, Noble/ACG-7508-2022	Anumbe, Noble/0000-0003-0042-9563; Singhania, Udit/0000-0002-4400-2783														2296-2565				OCT 11	2021	9
J	Wang, WR; Chen, YN; Wang, WH; Xia, ZH; Li, XY; Kayumba, PM				Wang Wanrui; Chen Yaning; Wang Weihua; Xia Zhenhua; Li Xiaoyang; Kayumba, Patient M.			Hydrochemical characteristics and evolution of groundwater in the dried-up river oasis of the Tarim Basin, Central Asia	JOURNAL OF ARID LAND																															1674-6767	2194-7783				OCT	2021	13	10
J	Yin, XW; Feng, Q; Li, Y; Liu, W; Zhu, M; Xu, GQ; Zheng, XJ; Sindikubwabo, C				Yin, Xinwei; Feng, Qi; Li, Yan; Liu, Wei; Zhu, Meng; Xu, Guiqing; Zheng, Xinjun; Sindikubwabo, Celestin			Induced soil degradation risks and plant responses by salinity and sodicity in intensive irrigated agro-ecosystems of seasonally-frozen arid regions	JOURNAL OF HYDROLOGY																	CELESTIN, SINDIKUBWABO/GRX-8920-2022	CELESTIN, SINDIKUBWABO/0000-0002-9297-6697													0022-1694	1879-2707				DEC	2021	603		B
J	Guiza, M; Benabdelrahim, MA; Brini, F; Haddad, M; Saibi, W				Guiza, Maroua; Benabdelrahim, Mohammed Ali; Brini, Faical; Haddad, Mansour; Saibi, Walid			Assessment of Alfalfa (Medicago sativa L.) Cultivars for Salt Tolerance Based on Yield, Growth, Physiological, and Biochemical Traits	JOURNAL OF PLANT GROWTH REGULATION																		saibi, walid/0000-0002-5626-7084													0721-7595	1435-8107				DEC	2022	41	8
J	Manaf, SAA; Fuzi, SFZM; Low, KO; Hegde, G; Manas, NHA; Illias, RM; Chia, KS				Manaf, Shoriya Aruni Abdul; Fuzi, Siti Fatimah Zaharah Mohamad; Low, Kheng Oon; Hegde, Gurumurthy; Manas, Nor Hasmaliana Abdul; Illias, Rosli Md; Chia, Kim Seng			Carbon nanomaterial properties help to enhance xylanase production from recombinant Kluyveromyces lactis through a cell immobilization method	APPLIED MICROBIOLOGY AND BIOTECHNOLOGY																	Chia, Kim Seng/Y-5238-2019; Hegde, Gurumurthy/A-1192-2012	Chia, Kim Seng/0000-0003-0854-8954; Hegde, Gurumurthy/0000-0002-1200-5664; Mohamad Fuzi, Siti Fatimah Zaharah/0000-0003-3802-043X													0175-7598	1432-0614				NOV	2021	105	21-22
J	Miguez-Macho, G; Fan, Y				Miguez-Macho, Gonzalo; Fan, Ying			Spatiotemporal origin of soil water taken up by vegetation	NATURE																	Fan, Ying/HJG-7030-2022	Fan, Ying/0000-0002-0024-7965; Miguez-Macho, Gonzalo/0000-0002-4259-7883													0028-0836	1476-4687				OCT 28	2021	598	7882
J	Mahmod, WE; Mohamed, HI; Suleiman, AH				Mahmod, Wael Elham; Mohamed, Hassan, I; Suleiman, Ahmed H.			Integrated approach for optimizing groundwater monitoring systems using evolutionary algorithms	HYDROLOGICAL SCIENCES JOURNAL-JOURNAL DES SCIENCES HYDROLOGIQUES																		Mohamed, Hassan/0000-0003-3713-7142													0262-6667	2150-3435				OCT 3	2021	66	13
J	Liu, JH; Zhao, Z; Yan, Y; Ali, A; Ahmed, Z; He, DH; Yu, MF; Hang, J; Perven, M; Nazir, T; Tayyib, M; Zhao, ZH				Liu, JunHe; Zhao, Zhong; Yan, Yan; Ali, Abid; Ahmed, Zeeshan; He, DaHan; Yu, Mingfu; Hang, Jia; Perven, Misbah; Nazir, Tamsila; Tayyib, Muhammad; Zhao, ZiHua			Effect of alfalfa habitat change on dispersal behavior of Harmonia axyridis Pallas and Hippodamia variegata Goeze (Coleoptera: Coccinellidae)	JOURNAL OF ASIA-PACIFIC ENTOMOLOGY																	Ali, Abid/S-7218-2019	Ali, Abid/0000-0003-3674-7811													1226-8615	1876-7990				DEC	2021	24	4
J	Yin, XW; Feng, Q; Li, Y; Deo, RC; Liu, W; Zhu, M; Zheng, XJ; Liu, R				Yin, Xinwei; Feng, Qi; Li, Yan; Deo, Ravinesh C.; Liu, Wei; Zhu, Meng; Zheng, Xinjun; Liu, Ran			An interplay of soil salinization and groundwater degradation threatening coexistence of oasis-desert ecosystems	SCIENCE OF THE TOTAL ENVIRONMENT																															0048-9697	1879-1026				FEB 1	2022	806		2
J	Alqarni, AS; Iqbal, J; Raweh, HS; Hassan, AMA; Owayss, AA				Alqarni, Abdulaziz S.; Iqbal, Javaid; Raweh, Hael S.; Hassan, Awad M. A.; Owayss, Ayman A.			Beekeeping in the Desert: Foraging Activities of Honey Bee during Major Honeyflow in a Hot-Arid Ecosystem	APPLIED SCIENCES-BASEL																	Awad, Awad/R-1352-2016; Iqbal, Javaid/X-1554-2018; Alqarni, Abdulaziz/D-5246-2015	Awad, Awad/0000-0001-8605-5114; Iqbal, Javaid/0000-0002-8298-129X; Alqarni, Abdulaziz/0000-0003-1324-332X														2076-3417				OCT	2021	11	20
J	Andrushia, AD; Sagayam, KM; Dang, H; Pomplun, M; Quach, L				Andrushia, A. Diana; Sagayam, K. Martin; Hien Dang; Pomplun, Marc; Quach, Lien			Visual-Saliency-Based Abnormality Detection for MRI Brain Images-Alzheimer's Disease Analysis	APPLIED SCIENCES-BASEL																	A, Diana Andrushia./I-5241-2014	A, Diana Andrushia./0000-0003-0001-2733; Dang, Hien/0000-0002-7112-9966														2076-3417				OCT	2021	11	19
J	Arango, C; Dragioti, E; Solmi, M; Cortese, S; Domschke, K; Murray, RM; Jones, PB; Uher, R; Carvalho, AF; Reichenberg, A; Shin, JI; Andreassen, OA; Correll, CU; Fusar-Poli, P				Arango, Celso; Dragioti, Elena; Solmi, Marco; Cortese, Samuele; Domschke, Katharina; Murray, Robin M.; Jones, Peter B.; Uher, Rudolf; Carvalho, Andre F.; Reichenberg, Abraham; Shin, Jae Ii; Andreassen, Ole A.; Correll, Christoph U.; Fusar-Poli, Paolo			Risk and protective factors for mental disorders beyond genetics: an evidence-based atlas	WORLD PSYCHIATRY																	Arango, Celso/AAZ-8314-2021; Cortese, Samuele/G-1255-2019; Correll, Christoph/D-3530-2011; Uher, Rudolf/A-5477-2008; Reichenberg, Abraham/GQB-1227-2022; Solmi, Marco/K-3906-2018; SHIN, JAE IL/J-6922-2017	Arango, Celso/0000-0003-3382-4754; Cortese, Samuele/0000-0001-5877-8075; Correll, Christoph/0000-0002-7254-5646; Uher, Rudolf/0000-0002-2998-0546; Solmi, Marco/0000-0003-4877-7233; SHIN, JAE IL/0000-0003-2326-1820; Jones, Peter Brian/0000-0002-0387-880X													1723-8617	2051-5545				OCT	2021	20	3
J	Brahim, N; Karbout, N; Dhaouadi, L; Bouajila, A				Brahim, Nadhem; Karbout, Nissaf; Dhaouadi, Latifa; Bouajila, Abdelhakim			Global Landscape of Organic Carbon and Total Nitrogen in the Soils of Oasis Ecosystems in Southern Tunisia	AGRONOMY-BASEL																	Brahim, Nadhem/ACJ-4512-2022	BRAHIM, Nadhem/0000-0002-2828-9657														2073-4395				OCT	2021	11	10
J	Chiorean, MV; Vermeire, S; Panes, J; Peyrin-Biroulet, L; Sands, BE; Schreiber, S; Akhundova-Unadkat, G; Naik, S; Rabbat, C; Sandborn, WJ				Chiorean, Michael V.; Vermeire, Severine; Panes, Julian; Peyrin-Biroulet, Laurent; Sands, Bruce E.; Schreiber, Stefan; Akhundova-Unadkat, Gamar; Naik, Snehal; Rabbat, Christopher; Sandborn, William J.			Etrasimod Improves Quality of Life in Adults With Moderate-to-Severe Ulcerative Colitis: Results From the Phase 2 OASIS Trial and Open-Label Extension	AMERICAN JOURNAL OF GASTROENTEROLOGY																		Vermeire, Severine/0000-0001-9942-3019													0002-9270	1572-0241				OCT	2021	116
J	Fusar-Poli, P; Radua, J; Jauhar, S				Fusar-Poli, Paolo; Radua, Joaquim; Jauhar, Sameer			Lack of robust meta-analytic evidence to favour cognitive behavioural therapy for prevention of psychosis	WORLD PSYCHIATRY																	Radua, Joaquim/H-6424-2019; Fusar-Poli, Paolo/D-8605-2011	Radua, Joaquim/0000-0003-1240-5438; Fusar-Poli, Paolo/0000-0003-3582-6788													1723-8617	2051-5545				OCT	2021	20	3
J	Garcia, JL; Lobos-Roco, F; Schween, JH; del Rio, C; Osses, P; Vives, R; Pezoa, M; Siegmund, A; Latorre, C; Alfaro, F; Koch, MA; Loehnert, U				Garcia, Juan-Luis; Lobos-Roco, Felipe; Schween, Jan H.; del Rio, Camilo; Osses, Pablo; Vives, Raimundo; Pezoa, Mariana; Siegmund, Alexander; Latorre, Claudio; Alfaro, Fernando; Koch, Marcus A.; Loehnert, Ulrich			Climate and coastal low-cloud dynamic in the hyperarid Atacama fog Desert and the geographic distribution of Tillandsia landbeckii (Bromeliaceae) dune ecosystems	PLANT SYSTEMATICS AND EVOLUTION																	Koch, Marcus A/A-4924-2011; Latorre, Claudio/E-6805-2012; UzK, IGMK/HGU-4003-2022; Garcia, Juan-Luis/U-6381-2017	Koch, Marcus A/0000-0002-1693-6829; Latorre, Claudio/0000-0003-4708-7599; Schween, Jan Herbert/0000-0001-6686-1207; Garcia, Juan-Luis/0000-0002-9028-7572; Alfaro Ayllon, Fernando Daniel/0000-0003-2922-1838													0378-2697	1615-6110				OCT	2021	307	5
J	Ju, JL; Wu, CH; Yeh, PJF; Dai, H; Hu, BX				Ju, Jiali; Wu, Chuanhao; Yeh, Pat J-F; Dai, Heng; Hu, Bill X.			Global precipitation-related extremes at 1.5 degrees C and 2 degrees C of global warming targets: Projection and uncertainty assessment based on the CESM-LWR experiment	ATMOSPHERIC RESEARCH																															0169-8095	1873-2895				DEC 15	2021	264
J	McGill, SF; Owen, LA; Weldon, RJ; Kendrick, KJ; Burgette, RJ				McGill, Sally F.; Owen, Lewis A.; Weldon, Ray J.; Kendrick, Katherine J.; Burgette, Reed J.			Latest Quaternary slip rates of the San Bernardino strand of the San Andreas fault, southern California, from Cajon Creek to Badger Canyon	GEOSPHERE																		McGill, Sally/0000-0001-7176-7055													1553-040X					OCT	2021	17	5
J	Pizarro-Araya, J; Alfaro, FM; Ojanguren-Affilastro, AA; Moreira-Munoz, A				Pizarro-Araya, Jaime; Alfaro, Fermin M.; Ojanguren-Affilastro, Andres A.; Moreira-Munoz, Andres			A Fine-Scale Hotspot at the Edge: Epigean Arthropods from the Atacama Coast (Paposo-Taltal, Antofagasta Region, Chile)	INSECTS																		Ojanguren Affilastro, Andres Alejandro/0000-0003-1093-5822; Moreira-Munoz, Andres/0000-0002-9136-1391														2075-4450				OCT	2021	12	10
J	Rioja, T; Tello, V; Fernandez, N; Ceballos, R				Rioja, Tommy; Tello, Victor; Fernandez, Natali; Ceballos, Ricardo			Behavioral responses of the woolly whitefly Aleurothrixus floccosus (Hemiptera: Aleyrodidae) to volatile organic compounds emitted from Citrus at laboratory conditions	CHILEAN JOURNAL OF AGRICULTURAL RESEARCH																															0718-5839					OCT-DEC	2021	81	4
J	Liu, B; Sun, AJ; Zhao, H; Fan, YX; Yang, LH; Li, Y; Li, S; Wang, KQ				Liu, Bing; Sun, Aijun; Zhao, Hui; Fan, Yuxin; Yang, Linhai; Li, Yuan; Li, Sen; Wang, Keqi			Physicochemical properties of surface sediments in the Taklimakan desert, northwestern China, and their relationship with oasis-desert evolution	CATENA																	li, yuan/GZH-3511-2022														0341-8162	1872-6887				JAN	2022	208
J	Yang, YP; Li, NN; Duan, WC; An, CY; Xue, JL; Jiang, Q; Cheng, DL; Shen, CC				Yang Yuping; Li Nana; Duan Weichao; An Chenye; Xue Jianliang; Jiang Qing; Cheng Dongle; Shen Chanchan			Preparation of Modified Enteromorpha-Immobilized Microbial Agent and Research on Diesel Removal Performance	CHINA PETROLEUM PROCESSING & PETROCHEMICAL TECHNOLOGY																	Jiang, Qing/GRX-7298-2022	Jiang, Qing/0000-0002-1487-0651													1008-6234					SEP 30	2021	23	3
J	Young, R; Nippita, TAC				Young, Rebecca; Nippita, Tanya A. C.			Training in obstetric anal sphincter injuries in Australia and New Zealand: A survey of Royal Australian and New Zealand College of Obstetricians and Gynaecologists trainees	AUSTRALIAN & NEW ZEALAND JOURNAL OF OBSTETRICS & GYNAECOLOGY																		Young, Rebecca/0000-0003-0871-1811													0004-8666	1479-828X				APR	2022	62	2
J	Zhang, ZH; Chai, XT; Tariq, A; Zeng, FJ; Graciano, C; Li, XY; Gao, YJ; Abd Ullah				Zhang, Zhihao; Chai, Xutian; Tariq, Akash; Zeng, Fanjiang; Graciano, Corina; Li, Xiangyi; Gao, Yanju; Abd Ullah			Coordinated Patterns in the Allocation, Composition, and Variability of Multiple Elements Among Organs of Two Desert Shrubs Under Nitrogen Addition and Drought	JOURNAL OF SOIL SCIENCE AND PLANT NUTRITION																	Zhang, Zhihao/AFP-6470-2022	Zhang, Zhihao/0000-0002-3260-7195; Ullah, Dr ABD/0000-0003-1570-0176; Tariq, Akash/0000-0002-5382-9336; Graciano, Corina/0000-0003-0803-4128													0718-9508	0718-9516				MAR	2022	22	1
J	Dolganov, PV; Shuravin, NS; Dolganov, VK; Kats, EI; Stannarius, R; Harth, K; Trittel, T; Park, CS; Maclennan, JE				Dolganov, P., V; Shuravin, N. S.; Dolganov, V. K.; Kats, E., I; Stannarius, R.; Harth, K.; Trittel, T.; Park, C. S.; Maclennan, J. E.			Transient hexagonal structures in sheared emulsions of isotropic inclusions on smectic bubbles in microgravity conditions	SCIENTIFIC REPORTS																	Dolganov, Pavel V/B-1532-2013	Dolganov, Pavel V/0000-0003-4906-0488													2045-2322					SEP 27	2021	11	1
J	Moula, A; Ellafi, A; Borgi, MA; Rhimi, S; Akermi, N; Namsi, A; Chaieb, M; Mekki, A				Moula, Amel; Ellafi, Ali; Borgi, Mohamed Ali; Rhimi, Soufien; Akermi, Nizar; Namsi, Ahmad; Chaieb, Mohamed; Mekki, Ali			Enhanced Bioremediation of Heavy Metals from Phosphate Processing Wastewater Using the Indigenous Bacterium Serratia rubidaea NCTC12971	GEOMICROBIOLOGY JOURNAL																		Borgi, Mohamed Ali/0000-0003-1314-9544; Namsi, Ahmed/0000-0003-3493-8788													0149-0451	1521-0529				NOV 2	2021	38	10
J	Sun, YJ; Mao, R; Gong, DY; Li, Y; Kim, SJ; Zhang, XX; Zhang, XZ; Hamidi, M				Sun, Yijie; Mao, Rui; Gong, Dao-Yi; Li, Ying; Kim, Seong-Joong; Zhang, Xiao-Xiao; Zhang, Xuezhen; Hamidi, Mehdi			Decadal shift of the influence of Arctic Oscillation on dust weather frequency in spring over the Middle East during 1974-2019	INTERNATIONAL JOURNAL OF CLIMATOLOGY																	Mao, Rui/C-3499-2013	Hamidi, Mehdi/0000-0002-7376-3303; zhang, xuezhen/0000-0002-3845-2403													0899-8418	1097-0088				MAR 30	2022	42	4
J	Okpoli, CC; Akinbulejo, BO				Okpoli, Cyril Chibueze; Akinbulejo, Blessing Omobolanle			Aeromagnetic and electrical resistivity mapping for groundwater development around Ilesha schist belt, southwestern Nigeria	JOURNAL OF PETROLEUM EXPLORATION AND PRODUCTION TECHNOLOGY																		okpoli, cyril/0000-0003-2844-3244													2190-0558	2190-0566				MAR	2022	12	3
J	Airiken, M; Zhang, F; Chan, NW; Kung, HT				Airiken, Muhadaisi; Zhang, Fei; Chan, Ngai Weng; Kung, Hsiang-te			Assessment of spatial and temporal ecological environment quality under land use change of urban agglomeration in the North Slope of Tianshan, China	ENVIRONMENTAL SCIENCE AND POLLUTION RESEARCH																	Zhang, Fei/AAD-6047-2019	Zhang, Fei/0000-0002-1194-8513													0944-1344	1614-7499				FEB	2022	29	8
J	Frihat, M; Hadj-Alouane, AB; Sadfi, C				Frihat, Mohamed; B.Hadj-Alouane, Atidel; Sadfi, Cherif			Optimization of the integrated problem of employee timetabling and job shop scheduling	COMPUTERS & OPERATIONS RESEARCH																		B. Hadj-Alouane, Atidel/0000-0002-4925-2036													0305-0548	1873-765X				JAN	2022	137
J	Lu, N; Niu, J; Kang, SZ; Singh, SK; Du, TS				Lu, Na; Niu, Jun; Kang, Shaozhong; Singh, Shailesh Kumar; Du, Taisheng			A hybrid PCA-SEM-ANN model for the prediction of water use efficiency	ECOLOGICAL MODELLING																		Niu, Jun/0000-0003-4245-5997; Singh, Shailesh Kumar/0000-0002-3521-3917													0304-3800	1872-7026				NOV 15	2021	460
J	Bekaddour, S; Ait-Mouheb, N; Hartani, T				Bekaddour, Sara; Ait-Mouheb, Nassim; Hartani, Tarik			Re-emergence of dry toilets and fecal nutrient reuse in M'zab cities	JOURNAL OF WATER SANITATION AND HYGIENE FOR DEVELOPMENT																		bekaddour, sara/0000-0003-2169-0090; Ait Mouheb, Nassim/0000-0003-0099-0983													2043-9083	2408-9362				NOV	2021	11	6
J	Sengupta, P; Dutta, S; Karkada, IR; Akhigbe, RE; Chinni, SVV				Sengupta, Pallav; Dutta, Sulagna; Karkada, Ivan Rolland; Akhigbe, Roland Eghoghosoa; Chinni, Suresh V. V.			Irisin, Energy Homeostasis and Male Reproduction	FRONTIERS IN PHYSIOLOGY																	Sengupta, Pallav/E-3392-2016; Dutta, Sulagna/W-5151-2017	Sengupta, Pallav/0000-0002-1928-5048; Dutta, Sulagna/0000-0002-7893-5282													1664-042X					SEP 21	2021	12
J	Zhang, DL; Yang, YP; Ran, M; Lan, B; Zhao, HY; Liu, Q				Zhang, Dongliang; Yang, Yunpeng; Ran, Min; Lan, Bo; Zhao, Hongyan; Liu, Qi			Vegetation dynamics and its response to climate change during the past 2000 years in the Altai Mountains, northwestern China	FRONTIERS OF EARTH SCIENCE																															2095-0195	2095-0209				JUN	2022	16	2
J	Zhao, YG; Zhang, FH; Mickan, B; Wang, D; Wang, WC				Zhao, Yaguang; Zhang, Fenghua; Mickan, Bede; Wang, Dan; Wang, Weichao			Physiological, proteomic, and metabolomic analysis provide insights into Bacillus sp.-mediated salt tolerance in wheat	PLANT CELL REPORTS																	Wang, Weichao/AAE-5178-2022	Wang, Weichao/0000-0003-2761-6561; Zhang, Fenghua/0000-0002-1666-9548													0721-7714	1432-203X				JAN	2022	41	1
J	Abuduxun, N; Windley, BF; Xiao, WJ; Zhang, JE; Chen, YC; Huang, P; Gan, JM; Sang, M				Abuduxun, Nijiati; Windley, Brian F.; Xiao, Wenjiao; Zhang, Ji'en; Chen, Yichao; Huang, Peng; Gan, Jingmin; Sang, Miao			Carboniferous tectonic incorporation of a Devonian seamount and oceanic crust into the South Tianshan accretionary orogen in the southern Altaids	INTERNATIONAL JOURNAL OF EARTH SCIENCES																	Xiao (肖文交), Wenjiao/GPT-2503-2022; Xiao, Wenjiao/A-2762-2010	Abuduxun, Nijiati/0000-0002-7502-5240													1437-3254	1437-3262				NOV	2022	111	8
J	Ali, A; Tariq, H; Abbas, S; Arshad, M; Li, S; Dong, L; Li, L; Li, WJ; Ahmed, I				Ali, Ahmad; Tariq, Hamza; Abbas, Saira; Arshad, Muhammad; Li, Shuai; Dong, Lei; Li, Li; Li, Wen-Jun; Ahmed, Iftikhar			Draft genome sequence of a multidrug-resistant novel candidate Pseudomonas sp. NCCP-436(T) isolated from faeces of a bovine host in Pakistan	JOURNAL OF GLOBAL ANTIMICROBIAL RESISTANCE																	Ahmed, Iftikhar/B-4694-2009; Arshad, Muhammad/F-4922-2012	Ahmed, Iftikhar/0000-0003-0969-7927; Arshad, Muhammad/0000-0002-2343-822X; Ali, Ahmad/0000-0003-4293-0225													2213-7165	2213-7173				DEC	2021	27
J	Kwicklis, E; Farnham, I; Hershey, RL; Visser, A; Iii, JH				Kwicklis, Edward; Farnham, Irene; Hershey, Ronald L.; Visser, Ate; Iii, John Hoaglund			Understanding long-term groundwater flow at Pahute Mesa and vicinity, Nevada National Security Site, USA, from naturally occurring geochemical and isotopic tracers	HYDROGEOLOGY JOURNAL																		Kwicklis, Edward/0000-0003-2982-396X; Visser, Ate/0000-0003-4048-4540													1431-2174	1435-0157				DEC	2021	29	8
J	Wu, YS; Deng, XH; Bagas, L; Xi-Chen; Chen, XA; Yue, SW; Jiang, X				Wu, Yan-Shuang; Deng, Xiao-Hua; Bagas, Leon; Xi-Chen; Chen, Xu-An; Yue, Su-Wei; Jiang, Xiao			Genesis of the Xiaobaishitou tungsten skarn deposit in the East Tianshan, NW China: insights from geology, fluid inclusion and isotopic geochemistry	INTERNATIONAL JOURNAL OF EARTH SCIENCES																		Deng, Xiaohua/0000-0002-0083-6081													1437-3254	1437-3262				NOV	2022	111	8
J	Yu, Y; Chen, X; Malik, I; Wistuba, M; Cao, YG; Hou, DD; Ta, ZJ; He, J; Zhang, LY; Yu, RD; Zhang, HY; Sun, LX				Yu Yang; Chen Xi; Malik, Ireneusz; Wistuba, Malgorzata; Cao Yiguo; Hou Dongde; Ta Zhijie; He Jing; Zhang Lingyun; Yu Ruide; Zhang Haiyan; Sun Lingxiao			Spatiotemporal changes in water, land use, and ecosystem services in Central Asia considering climate changes and human activities	JOURNAL OF ARID LAND																															1674-6767	2194-7783				SEP	2021	13	9
J	Bassir, Y; Wahid, A; Kartouni, A; Chakir, H; ELghorba, M				Bassir, Youssef; Wahid, Achraf; Kartouni, Abdelkarim; Chakir, Hamid; ELghorba, Mohamed			Comparative study of the service life of a central core and a helical strand constituting the same rope	ENGINEERING STRUCTURES																		WAHID, Achraf/0000-0003-3101-0861													0141-0296	1873-7323				NOV 15	2021	247
J	Solmi, M; Sharma, MS; Osimo, EF; Fornaro, M; Bortolato, B; Croatto, G; Miola, A; Vieta, E; Pariante, CM; Smith, L; Fusar-Poli, P; Shin, JI; Berk, M; Carvalho, AF				Solmi, Marco; Sharma, Manu Suresh; Osimo, Emanuele F.; Fornaro, Michele; Bortolato, Beatrice; Croatto, Giovanni; Miola, Alessandro; Vieta, Eduard; Pariante, Carmine M.; Smith, Lee; Fusar-Poli, Paolo; Shin, Jae Il; Berk, Michael; Carvalho, Andre F.			Peripheral levels of C-reactive protein, tumor necrosis factor-alpha, interleukin-6, and interleukin-1 beta across the mood spectrum in bipolar disorder: A meta-analysis of mean differences and variability	BRAIN BEHAVIOR AND IMMUNITY																	Osimo, Emanuele F/AAJ-6959-2020; SHIN, JAE IL/ABD-9660-2021; Solmi, Marco/K-3906-2018; SHIN, JAE IL/J-6922-2017; Fusar-Poli, Paolo/D-8605-2011; Vieta, Eduard/I-6330-2013	Osimo, Emanuele F/0000-0001-6239-5691; SHIN, JAE IL/0000-0003-2326-1820; Solmi, Marco/0000-0003-4877-7233; SHIN, JAE IL/0000-0003-2326-1820; Fusar-Poli, Paolo/0000-0003-3582-6788; Vieta, Eduard/0000-0002-0548-0053; Sharma, Manu/0000-0003-3737-3452													0889-1591	1090-2139				OCT	2021	97
J	Yue, P; Zuo, XA; Li, KH; Li, XY; Wang, SK; Misselbrook, T				Yue, Ping; Zuo, Xiaoan; Li, Kaihui; Li, Xiangyun; Wang, Shaokun; Misselbrook, Tom			Precipitation changes regulate the annual methane uptake in a temperate desert steppe	SCIENCE OF THE TOTAL ENVIRONMENT																	岳, 平/GWC-4881-2022; Misselbrook, Tom/N-2385-2014	Misselbrook, Tom/0000-0002-4594-3606													0048-9697	1879-1026				JAN 15	2022	804
J	Christmann, S; Bencharki, Y; Anougmar, S; Rasmont, P; Smaili, MC; Tsivelikas, A; Aw-Hassan, A				Christmann, Stefanie; Bencharki, Youssef; Anougmar, Soukaina; Rasmont, Pierre; Smaili, Moulay Chrif; Tsivelikas, Athanasios; Aw-Hassan, Aden			Farming with Alternative Pollinators benefits pollinators, natural enemies, and yields, and offers transformative change to agriculture	SCIENTIFIC REPORTS																		Bencharki, Youssef/0000-0001-9179-5950													2045-2322					SEP 14	2021	11	1
J	Hu, YA; Duan, WL; Chen, YN; Zou, S; Kayumba, PM; Sahu, N				Hu, Yanan; Duan, Weili; Chen, Yaning; Zou, Shan; Kayumba, Patient Mindje; Sahu, Netrananda			An integrated assessment of runoff dynamics in the Amu Darya River Basin: Confronting climate change and multiple human activities, 1960-2017	JOURNAL OF HYDROLOGY																	Sahu, Netrananda/ABH-8714-2022; DUAN, Weili/A-1928-2019	Sahu, Netrananda/0000-0001-8505-7185; Zou, Shan/0000-0003-3896-5679; DUAN, Weili/0000-0002-1503-8066													0022-1694	1879-2707				DEC	2021	603		A
J	Elqars, E; Guennoun, M; Ouarhach, A; Houssini, NS; Elhafdi, M; Essadki, A; Chaoui, MA; Nbigui, T				Elqars, Esseddik; Guennoun, Mohamed; Ouarhach, Aicha; Houssini, Noufissa Sqalli; Elhafdi, Mohammed; Essadki, Abdelhafid; Chaoui, Mohamed Ait; Nbigui, Taibi			Expired Chicken Egg-White Extract's Adsorption Behavior As a Corrosion Inhibitor for Carbon Steel in 1M HCl	JOURNAL OF CHEMISTRY																		Guennoun, Mohamed/0000-0003-3005-9866; ESSEDDIK, ELQARS/0000-0002-3368-9487; Aicha, OUARHACH/0000-0001-7689-7780													2090-9063	2090-9071				SEP 10	2021	2021
J	Li, DF; Wang, XM				Li, Danfeng; Wang, Xunming			Assessing irrigated water utilization to optimize irrigation schedule in the oasis-desert ecotone of Hexi Corridor of China	AGRICULTURE ECOSYSTEMS & ENVIRONMENT																	Li, Danfeng/ABE-7835-2021														0167-8809	1873-2305				DEC 1	2021	322
J	Chitra, S; Hinahara, J; Goss, TF; Gunter, K; LaPensee, K				Chitra, Surya; Hinahara, Jordan; Goss, Thomas F.; Gunter, Kyle; LaPensee, Kenneth			Health-Related Quality of Life as Measured by the 36-Item Short Form Survey Among Adults With Acute Bacterial Skin and Skin Structure Infections who Received Either Omadacycline or Linezolid in a Phase 3 Double-Blind, Double-Dummy Clinical Trial	OPEN FORUM INFECTIOUS DISEASES																															2328-8957					OCT	2021	8	10
J	Murgas, F; Astudillo-Defru, N; Bonfils, X; Crossfield, I; Almenara, JM; Livingston, J; Stassun, KG; Korth, J; Orell-Miquel, J; Morello, G; Eastman, JD; Lissauer, JJ; Kane, SR; Morales, FY; Werner, MW; Gorjian, V; Benneke, B; Dragomir, D; Matthews, EC; Howell, SB; Ciardi, D; Gonzales, E; Matson, R; Beichman, C; Schlieder, J; Collins, KA; Collins, KI; Jensen, ELN; Evans, P; Pozuelos, FJ; Gillon, M;…				Murgas, F.; Astudillo-Defru, N.; Bonfils, X.; Crossfield, I; Almenara, J. M.; Livingston, J.; Stassun, K. G.; Korth, J.; Orell-Miquel, J.; Morello, G.; Eastman, J. D.; Lissauer, J. J.; Kane, S. R.; Morales, F. Y.; Werner, M. W.; Gorjian, V; Benneke, B.; Dragomir, D.; Matthews, E. C.; Howell, S. B.; Ciardi, D.; Gonzales, E.; Matson, R.; Beichman, C.; Schlieder, J.; Collins, K. A.; Collins, K., I; …			TOI-674b: An oasis in the desert of exo-Neptunes transiting a nearby M dwarf star	ASTRONOMY & ASTROPHYSICS																	Figueira, Pedro/J-4916-2013; Korth, Judith/AAD-4541-2022; Orell-Miquel, Jaume/ABE-9799-2021; Santos, Nuno C/E-9957-2011	Figueira, Pedro/0000-0001-8504-283X; Orell-Miquel, Jaume/0000-0003-2066-8959; Santos, Nuno C/0000-0003-4422-2919; Jensen, Eric/0000-0002-4625-7333; Astudillo-Defru, Nicola/0000-0002-8462-515X; Melo, Claudio/0000-0002-6090-8446; Bouchy, Francois/0000-0002-7613-393X; Collins, Kevin/0000-0003-2781-3207; Pepe, Francesco/0000-0002-9815-773X; Korth, Judith/0000-0002-0076-6239; Murgas, Felipe/0000-0001-…													0004-6361	1432-0746				SEP 7	2021	653
J	Tlili, H; Bali, M; Boukchina, R				Tlili, Hiba; Bali, Mahmoud; Boukchina, Rachid			Assessment of the performance of intermittent planted filters in treating urban wastewater under arid climate	WATER SCIENCE AND TECHNOLOGY																	Bali, Mahmoud/HKF-1442-2023	Mahmoud, Bali/0000-0002-5288-9732													0273-1223	1996-9732				OCT 1	2021	84	7
J	Xue, D; Deng, XH; Bagas, L; Chen, XA; Wu, YS; Jiang, X				Xue, Dong; Deng, Xiao-Hua; Bagas, Leon; Chen, Xu-An; Wu, Yan-Shuang; Jiang, Xiao			Genesis of the Heiyanshan Tungsten Skarn Deposit in the East Tianshan, NW China: Insights From Geology, Fluid Inclusion, Isotopic Geochemistry and Geochronology	FRONTIERS IN EARTH SCIENCE																		Deng, Xiaohua/0000-0002-0083-6081														2296-6463				SEP 7	2021	9
J	Weng, Z; Niu, J; Zhang, WM; Sivakumar, B; Chen, J; Du, TS				Weng, Zhen; Niu, Jun; Zhang, Wenming; Sivakumar, Bellie; Chen, Ji; Du, Taisheng			Towards a greater awareness for drought mitigation in China	STOCHASTIC ENVIRONMENTAL RESEARCH AND RISK ASSESSMENT																		Niu, Jun/0000-0003-4245-5997													1436-3240	1436-3259				JUN	2022	36	6
J	Ramon, A; Cano-Jimenez, E; Rodriguez-Nieto, MJ; Ortiz, ADR; Villar, A; Armengol, S; Jula, A; Morros, M				Ramon, Alba; Cano-Jimenez, Esteban; Rodriguez-Nieto, Maria Jesus; Ortiz, Ana Dolores Romero; Villar, Ana; Armengol, Silvia; Julia, Anna; Morros, Marta			Economic impact of IPF exacerbations in Spain: prospective, observational, multicentric study (OASIS study)	EUROPEAN RESPIRATORY JOURNAL																															0903-1936	1399-3003				SEP 5	2021	58
J	Bolan, N; Hoang, SA; Tanveer, M; Wang, L; Bolan, S; Sooriyakumar, P; Robinson, B; Wijesekara, H; Wijesooriya, M; Keerthanan, S; Vithanage, M; Markert, B; Franzle, S; Wunschmann, S; Sarkar, B; Vinu, A; Kirkham, MB; Siddique, KHM; Rinklebe, J				Bolan, Nanthi; Hoang, Son A.; Tanveer, Mohsin; Wang, Lei; Bolan, Shiv; Sooriyakumar, Prasanthi; Robinson, Brett; Wijesekara, Hasintha; Wijesooriya, Madhuni; Keerthanan, S.; Vithanage, Meththika; Markert, Bernd; Fraenzle, Stefan; Wuenschmann, Simone; Sarkar, Binoy; Vinu, Ajayan; Kirkham, M. B.; Siddique, Kadambot H. M.; Rinklebe, Joerg			From mine to mind and mobiles - Lithium contamination and its risk management	ENVIRONMENTAL POLLUTION																	Tanveer, Mohsin/I-2577-2019; Bolan, Nanthi Sirangie/E-8535-2011; Rinklebe, Joerg/Y-2398-2019; Keerthanan, S/AAX-2250-2020; Siddique, Kadambot H.M./B-3462-2011; Vithanage, Meththika/J-2982-2019; Sarkar, Binoy/D-1573-2011	Tanveer, Mohsin/0000-0003-4560-6439; Bolan, Nanthi Sirangie/0000-0003-2056-1692; Rinklebe, Joerg/0000-0001-7404-1639; Keerthanan, S/0000-0003-2143-0336; Siddique, Kadambot H.M./0000-0001-6097-4235; Vithanage, Meththika/0000-0003-2923-4065; Sarkar, Binoy/0000-0002-4196-1225; WANG, Lei/0000-0002-8253-7295; Sooriyakumar, Prasanthi/0000-0003-1211-5502; Hoang, Son A./0000-0003-2700-5779													0269-7491	1873-6424				DEC 1	2021	290
J	Mischke, S; Lai, ZP; Faershtein, G; Porat, N; Rohl, M; Braun, P; Kalbe, J; Ginat, H				Mischke, Steffen; Lai, Zhongping; Faershtein, Galina; Porat, Naomi; Roehl, Matthias; Braun, Paul; Kalbe, Johannes; Ginat, Hanan			A Late Pleistocene Wetland Setting in the Arid Jurf ed Darawish Region in Central Jordan	FRONTIERS IN EARTH SCIENCE																		, Johannes Kalbe/0000-0002-1641-2937; BRAUN, Paul Jean-Charles/0000-0002-3620-6188; Lai, Zhongping/0000-0002-0139-9346														2296-6463				SEP 3	2021	9
J	Saidani, T; El Touati, Y				Saidani, Taoufik; El Touati, Yamen			A vehicle plate recognition system based on deep learning algorithms	MULTIMEDIA TOOLS AND APPLICATIONS																															1380-7501	1573-7721				DEC	2021	80	30
J	Ahmad, F; Kurugollu, F; Kerrache, CA; Sezer, S; Liu, L				Ahmad, Farhan; Kurugollu, Fatih; Kerrache, Chaker Abdelaziz; Sezer, Sakir; Liu, Lu			NOTRINO: A NOvel Hybrid TRust Management Scheme for INternet-of-Vehicles	IEEE TRANSACTIONS ON VEHICULAR TECHNOLOGY																	lu, lu/HGA-0894-2022; Kerrache, Chaker Abdelaziz/I-7062-2019; lu, lu/HII-7530-2022	Kerrache, Chaker Abdelaziz/0000-0001-9990-519X; Liu, Lu/0000-0003-1013-4507; Kurugollu, Fatih/0000-0002-2508-4496													0018-9545	1939-9359				SEP	2021	70	9
J	Blauvelt, A; Kimball, AB; Augustin, M; Okubo, Y; Witte, M; Sontag, A; Arora, V; Osuntokun, O; Strober, B				Blauvelt, Andrew; Kimball, Alexa B.; Augustin, Matthias; Okubo, Yukari; Witte, Michael; Sontag, Angelina; Arora, Vipin; Osuntokun, Olawale; Strober, Bruce			Efficacy and safety of mirikizumab in psoriasis: 52-week results from the OASIS-1 randomized controlled trial	JOURNAL OF THE AMERICAN ACADEMY OF DERMATOLOGY					Virtual Meeting Experience (VMX) of the American-Academy-of-Dermatology (AAD)	APR 23-25, 2021	ELECTR NETWORK	Amer Acad Dermatol									OKUBO, YUKARI/AEX-3889-2022; OKUBO, YUKARI/AAG-7997-2022														0190-9622	1097-6787				SEP	2021	85	3
J	Calhoun, L; Maytan-Joneydi, A; Moumouni, NA; Benova, L; Delvaux, T; van den Akker, T; Speizer, I				Calhoun, L.; Maytan-Joneydi, A.; Moumouni, N. A.; Benova, L.; Delvaux, T.; van den Akker, T.; Speizer, I.			I got what I came for: a qualitative exploration into family planning client satisfaction in Dosso region, Niger	TROPICAL MEDICINE & INTERNATIONAL HEALTH																															1360-2276	1365-3156				SEP	2021	26
J	Haxim, Y; Si, Y; Liu, XJ; Wen, XJ; Kahar, G; Ding, Y; Li, XS; Zhang, DY				Haxim, Yakupjan; Si, Yu; Liu, Xiaojie; Wen, Xuejing; Kahar, Gulnaz; Ding, Yu; Li, Xiaoshuang; Zhang, Daoyuan			Genome-Wide Characterization of HSP90 Gene Family in Malus sieversii and Their Potential Roles in Response to Valsa mali Infection	FORESTS																	Haxim, Yakupjan/GWC-3882-2022	Haxim, Yakupjan/0000-0001-8559-0238														1999-4907				SEP	2021	12	9
J	Jerzykiewicz, T; Currie, PJ; Fanti, F; Lefeld, J				Jerzykiewicz, Tomasz; Currie, Philip J.; Fanti, Federico; Lefeld, Jerzy			Lithobiotopes of the Nemegt Gobi Basin	CANADIAN JOURNAL OF EARTH SCIENCES																		Fanti, Federico/0000-0002-2961-8301													0008-4077	1480-3313				SEP	2021	58	9
J	Ji, XB; Zhao, WZ; Jin, BW; Liu, J; Xu, FN; Zhou, H				Ji, Xibin; Zhao, Wenzhi; Jin, Bowen; Liu, Jane; Xu, Feinan; Zhou, Hai			Seasonal variations in energy exchange and evapotranspiration of an oasis-desert ecotone in an arid region	HYDROLOGICAL PROCESSES																		Zhao, Wenzhi/0000-0002-6347-5885; Liu, Jane/0000-0001-7760-2788													0885-6087	1099-1085				SEP	2021	35	9
J	Kebede, E; Yoseph, E; Asaye, H; Mulate, B				Kebede, E.; Yoseph, E.; Asaye, H.; Mulate, B.			Examining Healthcare Workers' Perspectives & Insights Concerning Availability of Medical Equipment in Three Ethiopian Hospitals: A Qualitative Pilot Study	TROPICAL MEDICINE & INTERNATIONAL HEALTH																															1360-2276	1365-3156				SEP	2021	26
J	Li, H; Shi, QD; Wan, YB; Shi, HB; Imin, B				Li, Hao; Shi, Qingdong; Wan, Yanbo; Shi, Haobo; Imin, Bilal			Influence of Surface Water on Desert Vegetation Expansion at the Landscape Scale: A Case Study of the Daliyabuyi Oasis, Taklamakan Desert	SUSTAINABILITY																		Hao, Li/0000-0002-8002-0954														2071-1050				SEP	2021	13	17
J	Liu, W; Ma, L; Abuduwaili, J; Issanova, G; Saparov, G				Liu, Wen; Ma, Long; Abuduwaili, Jilili; Issanova, Gulnura; Saparov, Galymzhan			Sediment Organic Carbon Sequestration of Balkhash Lake in Central Asia	SUSTAINABILITY																		Liu, Wen/0000-0002-5524-0496; Ma, Long/0000-0002-8233-8640; ji, li li/0000-0001-8483-1554														2071-1050				SEP	2021	13	17
J	Liu, WB; Sun, FB; Feng, Y; Li, C; Chen, J; Sang, YF; Zhang, Q				Liu, Wenbin; Sun, Fubao; Feng, Yao; Li, Chao; Chen, Jie; Sang, Yan-Fang; Zhang, Qiang			Increasing population exposure to global warm-season concurrent dry and hot extremes under different warming levels	ENVIRONMENTAL RESEARCH LETTERS																	Liu, Wenbin/AAB-2665-2021; Sun, Fubao/Q-2421-2019; sang, yan-fang/I-8277-2016	Liu, Wenbin/0000-0002-9569-6762; sang, yan-fang/0000-0001-6770-9311													1748-9326					SEP	2021	16	9
J	Mantravadi, K; Rao, DG				Mantravadi, Krishna; Rao, Durga Gedela			IS THERE A ROLE FOR USE OF SURGICALLY RETRIEVED TESTICULAR SPERMS IN INDIVIDUALS WITH CRYPTOZOOSPERMIA?	FERTILITY AND STERILITY																															0015-0282	1556-5653				SEP	2021	116	3
J	Mantravadi, K; Rao, DG				Mantravadi, Krishna; Rao, Durga Gedela			CAN MICROFLUIDIC SPERM SORTING HELP SEPARATION OF SPERMS WITH GOOD QUALITY DNA?	FERTILITY AND STERILITY																															0015-0282	1556-5653				SEP	2021	116	3
J	Mohammed, HA; Al-Omar, MS; Khan, RA; Mohammed, SAA; Qureshi, KA; Abbas, MM; Al Rugaie, O; Abd-Elmoniem, E; Ahmad, AM; Kandil, YI				Mohammed, Hamdoon A.; Al-Omar, Mohsen S.; Khan, Riaz A.; Mohammed, Salman A. A.; Qureshi, Kamal A.; Abbas, Manal M.; Al Rugaie, Osamah; Abd-Elmoniem, Essam; Ahmad, Adel M.; Kandil, Yasser, I			Chemical Profile, Antioxidant, Antimicrobial, and Anticancer Activities of the Water-Ethanol Extract of Pulicaria undulata Growing in the Oasis of Central Saudi Arabian Desert	PLANTS-BASEL																	Qureshi, Kamal Ahmad/GQB-0550-2022; Mohammed, Hamdoon A./AAX-9602-2021; Kandil, Yasser Ibrahim/T-4490-2018; Rugaie, Osamah Al/AAF-1360-2019; Qureshi, Kamal Ahmad/AAY-2259-2021; Abbas, Manal/HFZ-7643-2022; Ahmed, Adel Mohamed/AAB-7509-2022; Mohammed, Salman Afroze Azmi/ABD-9458-2021; Ahmed, Adel/AAA-6918-2022	Qureshi, Kamal Ahmad/0000-0002-3498-797X; Mohammed, Hamdoon A./0000-0003-2896-6790; Kandil, Yasser Ibrahim/0000-0002-7156-9208; Rugaie, Osamah Al/0000-0001-8148-0138; Qureshi, Kamal Ahmad/0000-0002-3498-797X; Mohammed, Salman Afroze Azmi/0000-0002-9250-100X; Ahmed, Adel/0000-0001-9118-7752; Khan, Riaz/0000-0003-0185-0149														2223-7747				SEP	2021	10	9
J	Murtaza, G; Ditta, A; Ahmed, Z; Usman, M; Faheem, M; Tariq, A				Murtaza, Ghulam; Ditta, Allah; Ahmed, Zeeshan; Usman, Muhammad; Faheem, Muhammad; Tariq, Akash			Co-biosorption potential of Acacia nilotica bark in removing Ni and aminoazobenzene from contaminated wastewater	DESALINATION AND WATER TREATMENT																	Usman, Muhammad/ABG-4939-2021; Ditta, Allah/J-1931-2019	Usman, Muhammad/0000-0002-5923-5272; Ditta, Allah/0000-0003-1745-4757													1944-3994	1944-3986				SEP	2021	233
J	Rao, DG; Mantravadi, K; Vemula, K				Rao, Durga Gedela; Mantravadi, Krishna; Vemula, Keerthana			DOES TROPHECTODERM BIOPSY IN PREIMPLANTATION GENETIC TESTING AFFECT SERUM BETA HCG LEVELS?	FERTILITY AND STERILITY																															0015-0282	1556-5653				SEP	2021	116	3
J	Rao, DG; Mantravadi, K				Rao, Durga Gedela, Sr.; Mantravadi, Krishna, Sr.			RECURRENT IMPLANTATION FAILURE - ROLE OF PGT AND ERA TO OPTIMIZE REPRODUCTIVE OUTCOMES?	FERTILITY AND STERILITY																															0015-0282	1556-5653				SEP	2021	116	3
J	Rimal, B; Rijal, S; Stork, N; Keshtkar, H; Zhang, LF				Rimal, Bhagawat; Rijal, Sushila; Stork, Nigel; Keshtkar, Hamidreza; Zhang, Lifu			Forest restoration and support for sustainable ecosystems in the Gandaki Basin, Nepal	ENVIRONMENTAL MONITORING AND ASSESSMENT																															0167-6369	1573-2959				SEP	2021	193	9
J	Saratxaga, CL; Moya, I; Picon, A; Acosta, M; Moreno-Fernandez-de-Leceta, A; Garrote, E; Bereciartua-Perez, A				Saratxaga, Cristina L.; Moya, Iratxe; Picon, Artzai; Acosta, Marina; Moreno-Fernandez-de-Leceta, Aitor; Garrote, Estibaliz; Bereciartua-Perez, Arantza			MRI Deep Learning-Based Solution for Alzheimer's Disease Prediction	JOURNAL OF PERSONALIZED MEDICINE																	Moreno Fdz de Leceta, Aitor/GXN-3466-2022	Moreno Fdz de Leceta, Aitor/0000-0003-0556-4457; L. Saratxaga, Cristina/0000-0003-1429-7936; Picon, Artzai/0000-0002-3316-6571; Bereciartua, Arantza/0000-0002-2147-2213														2075-4426				SEP	2021	11	9
J	Solmi, M; Fiedorowicz, J; Poddighe, L; Delogu, M; Miola, A; Hoye, A; Heiberg, IH; Stubbs, B; Smith, L; Larsson, H; Attar, R; Nielsen, RE; Cortese, S; Shin, JI; Fusar-Poli, P; Firth, J; Yatham, LN; Carvalho, AF; Castle, DJ; Seeman, MV; Correll, CU				Solmi, Marco; Fiedorowicz, Jess; Poddighe, Laura; Delogu, Marco; Miola, Alessandro; Hoye, Anne; Heiberg, Ina H.; Stubbs, Brendon; Smith, Lee; Larsson, Henrik; Attar, Rubina; Nielsen, Rene E.; Cortese, Samuele; Shin, Jae Il; Fusar-Poli, Paolo; Firth, Joseph; Yatham, Lakshmi N.; Carvalho, Andre F.; Castle, David J.; Seeman, Mary, V; Correll, Christoph U.			Disparities in Screening and Treatment of Cardiovascular Diseases in Patients With Mental Disorders Across the World: Systematic Review and Meta-Analysis of 47 Observational Studies	AMERICAN JOURNAL OF PSYCHIATRY																	Fiedorowicz, Jess/I-2512-2019; Solmi, Marco/K-3906-2018; Heiberg, Ina/GPG-0958-2022; Cortese, Samuele/G-1255-2019; SHIN, JAE IL/J-6922-2017; SHIN, JAE IL/ABD-9660-2021; Correll, Christoph/D-3530-2011; Stubbs, Brendon/C-5696-2015; Fusar-Poli, Paolo/D-8605-2011	Fiedorowicz, Jess/0000-0003-2057-4071; Solmi, Marco/0000-0003-4877-7233; Cortese, Samuele/0000-0001-5877-8075; SHIN, JAE IL/0000-0003-2326-1820; SHIN, JAE IL/0000-0003-2326-1820; Correll, Christoph/0000-0002-7254-5646; Stubbs, Brendon/0000-0001-7387-3791; Attar, Rubina/0000-0003-1009-4189; Larsson, Henrik/0000-0002-6851-3297; Fusar-Poli, Paolo/0000-0003-3582-6788													0002-953X	1535-7228				SEP	2021	178	9
J	Villano, D; Zafrilla, P; Garcia-Viguera, C; Dominguez-Perles, R				Villano, Debora; Zafrilla, Pilar; Garcia-Viguera, Cristina; Dominguez-Perles, Raul			A UHPLC/MS/MS method for the analysis of active and inactive forms of GLP-1 and GIP incretins in human plasma	TALANTA																	Villaño, Debora/S-5349-2019; Dominguez-Perles, Raul/J-7456-2013	Villaño, Debora/0000-0002-8162-8857; ZAFRILLA, PILAR/0000-0002-1463-7120; Dominguez-Perles, Raul/0000-0001-6232-712X													0039-9140	1873-3573				JAN 1	2022	236
J	Yin, H; Tariq, A; Zhang, B; Lv, GH; Zeng, FJ; Graciano, C; Santos, M; Zhang, ZH; Wang, P; Mu, SY				Yin, Hui; Tariq, Akash; Zhang, Bo; Lv, Guanghui; Zeng, Fanjiang; Graciano, Corina; Santos, Mauro; Zhang, Zhihao; Wang, Peng; Mu, Shuyong			Coupling Relationship of Leaf Economic and Hydraulic Traits of Alhagi sparsifolia Shap. in a Hyper-Arid Desert Ecosystem	PLANTS-BASEL																	Zhang, Zhihao/AFP-6470-2022; Santos, Mauro/D-7026-2012	Zhang, Zhihao/0000-0002-3260-7195; Santos, Mauro/0000-0001-5146-4591; Zhang, Bo/0000-0001-8065-1273; Graciano, Corina/0000-0003-0803-4128; Tariq, Akash/0000-0002-5382-9336														2223-7747				SEP	2021	10	9
J	Zhang, F; Chen, Y; Yuan, J; Ma, LG; Liu, CJ				Zhang, Fei; Chen, Yun; Yuan, Jie; Ma, Ligang; Liu, Changjiang			Growth characteristics of Suaeda salsa under different soil salinity gradients in controlled experiments	INTERNATIONAL JOURNAL OF AGRICULTURAL AND BIOLOGICAL ENGINEERING																	Zhang, Fei/AAD-6047-2019; Liu, Changjiang/GVU-0201-2022; Chen, Yun/C-8672-2011	Zhang, Fei/0000-0002-1194-8513; Chen, Yun/0000-0001-6819-6562													1934-6344	1934-6352				SEP	2021	14	5
J	Lopez-Serna, R; Bolado, S; Irusta, R; Jimenez, JJ				Lopez-Serna, Rebeca; Bolado, Silvia; Irusta, Ruben; Jimenez, Juan J.			Determination of veterinary drugs in microalgae biomass from photobioreactors fed with piggery wastewater	CHEMOSPHERE																	Bolado, Silvia/D-5591-2016; Jimenez, Juan Jose/M-7239-2016; Irusta-Mata, Ruben/I-3188-2015; Lopez Serna, Rebeca/I-6957-2015	Bolado, Silvia/0000-0003-0941-3306; Jimenez, Juan Jose/0000-0001-7831-290X; Irusta-Mata, Ruben/0000-0002-0082-2528; Lopez Serna, Rebeca/0000-0003-3927-057X													0045-6535	1879-1298				JAN	2022	287		1
J	Ogundola, AF; Akhigbe, RE; Saka, WA; Adeniyi, AO; Adeshina, OS; Babalola, DO; Akhigbe, TM				Ogundola, A. F.; Akhigbe, R. E.; Saka, W. A.; Adeniyi, A. O.; Adeshina, O. S.; Babalola, D. O.; Akhigbe, T. M.			Contraceptive potential of Andrographis paniculata is via androgen suppression and not induction of oxidative stress in male Wistar rats	TISSUE & CELL																		Saka, Waidi/0000-0002-3153-3657													0040-8166					DEC	2021	73
J	Narayanamoorthy, A; Suresh, R; Sujitha, KS				Narayanamoorthy, A.; Suresh, R.; Sujitha, K. S.			The dying oasis: a macro analysis of tank irrigation in Andhra Pradesh, India	INTERNATIONAL JOURNAL OF WATER RESOURCES DEVELOPMENT																															0790-0627	1360-0648				SEP 3	2022	38	5
J	Umwali, ED; Kurban, A; Isabwe, A; Mind'je, R; Azadi, H; Guo, ZK; Udahogora, M; Nyirarwasa, A; Umuhoza, J; Nzabarinda, V; Gasirabo, A; Sabirhazi, G				Umwali, Edovia Dufatanye; Kurban, Alishir; Isabwe, Alain; Mind'je, Richard; Azadi, Hossein; Guo, Zengkun; Udahogora, Madeleine; Nyirarwasa, Anathalie; Umuhoza, Jeanine; Nzabarinda, Vincent; Gasirabo, Aboubakar; Sabirhazi, Gulnur			Spatio-seasonal variation of water quality influenced by land use and land cover in Lake Muhazi	SCIENTIFIC REPORTS																	NZABARINDA, Vincent/AAL-9994-2021; Kurban, Alishir/AGK-9193-2022; Mind'je, Richard/GNP-0081-2022; CAS, KLUEH/T-5743-2019; Isabwe, Alain/AGK-8324-2022; Azadi, Hossein/E-2361-2011	NZABARINDA, Vincent/0000-0002-1591-1574; Kurban, Alishir/0000-0001-9387-8127; Azadi, Hossein/0000-0002-5108-1993; MIND'JE, RICHARD/0000-0003-4447-389X													2045-2322					AUG 30	2021	11	1
J	Maou, S; Meghezzi, A; Grohens, Y; Meftah, Y; Kervoelen, A; Magueresse, A				Maou, Samira; Meghezzi, Ahmed; Grohens, Yves; Meftah, Yazid; Kervoelen, Antoine; Magueresse, Anthony			Effect of various chemical modifications of date palm fibers (DPFs) on the thermo-physical properties of polyvinyl chloride (PVC)-high-density polyethylene (HDPE) composites	INDUSTRIAL CROPS AND PRODUCTS																		maou, samira/0000-0002-8309-5441													0926-6690	1872-633X				NOV 1	2021	171
J	Pan, NH; Guan, QY; Wang, QZ; Sun, YF; Li, HC; Ma, YR				Pan, Ninghui; Guan, Qingyu; Wang, Qingzheng; Sun, Yunfan; Li, Huichun; Ma, Yunrui			Spatial Differentiation and Driving Mechanisms in Ecosystem Service Value of Arid Region:A case study in the middle and lower reaches of Shule River Basin, NW China	JOURNAL OF CLEANER PRODUCTION																	wang, qingzheng/GXH-3660-2022														0959-6526	1879-1786				OCT 15	2021	319
J	Yang, HW; Hu, FL; Yin, W; Chai, Q; Zhao, C; Yu, AZ; Fan, ZL; Fan, H; Ren, XL				Yang, Hongwei; Hu, Falong; Yin, Wen; Chai, Qiang; Zhao, Cai; Yu, Aizhong; Fan, Zhilong; Fan, Hong; Ren, Xuling			Integration of tillage and planting density improves crop production and carbon mitigation of maize/pea intercropping in the oasis irrigation area of northwestern China	FIELD CROPS RESEARCH																	Yang, Hongwei/AGX-5467-2022														0378-4290	1872-6852				OCT 1	2021	272
J	Abdelfattah, NAH; Al-Qahtani, AR; Qari, SH				Abdelfattah, Nilly A. H.; Al-Qahtani, A. R.; Qari, Sameer H.			SCoT-marker analysis of Oryzaephilus surinamensis L. (Coleoptera: Silvanidae) and stored date kernels of Phoenix dactylifera (L.) fumigated with ozone and phosphine gases	JOURNAL OF ASIA-PACIFIC ENTOMOLOGY																															1226-8615	1876-7990				AUG	2021	24	3
J	Hu, ZH; Gao, X; Lei, JQ; Zhou, N				Hu, Zihao; Gao, Xin; Lei, Jiaqiang; Zhou, Na			Geomorphology of aeolian dunes in the western Sahara Desert	GEOMORPHOLOGY																															0169-555X	1872-695X				NOV 1	2021	392
J	Umuhoza, J; Jiapaer, G; Yin, HM; Mind'je, R; Gasirabo, A; Nzabarinda, V; Umwali, ED				Umuhoza, Jeanine; Jiapaer, Guli; Yin, Hanmin; Mind'je, Richard; Gasirabo, Aboubakar; Nzabarinda, Vincent; Umwali, Edovia Dufatanye			The analysis of grassland carrying capacity and its impact factors in typical mountain areas in Central Asia-A case of Kyrgyzstan and Tajikistan	ECOLOGICAL INDICATORS																	Mind'je, Richard/GNP-0081-2022; NZABARINDA, Vincent/AAL-9994-2021	NZABARINDA, Vincent/0000-0002-1591-1574; MIND'JE, RICHARD/0000-0003-4447-389X													1470-160X	1872-7034				NOV	2021	131
J	Khan, I; Luo, MS; Guo, L; Khan, S; Wang, CJ; Khan, A; Saeed, M; Zaman, S; Qi, KZ; Liu, QL				Khan, Iltaf; Luo, Mingsheng; Guo, Lin; Khan, Shoaib; Wang, Chunjuan; Khan, Aftab; Saeed, Muhmmad; Zaman, Saeed; Qi, Kezhen; Liu, Qing Long			Enhanced visible-light photoactivities of porous LaFeO3 by synchronously doping Ni2+ and coupling TS-1 for CO2 reduction and 2,4,6-trinitrophenol degradation	CATALYSIS SCIENCE & TECHNOLOGY																	Liu, Qing/GWC-9222-2022; DR-ILTAF, KHAN/L-8459-2017; Khan, Aftab Aslam Parwaz/H-5931-2012; liu, qingqing/HHD-0360-2022; KHAN, Dr-ILTAF/CAG-1080-2022; Saeed, Muhammad/N-8345-2017; LUO, MINGSHENG/AAR-3574-2020	DR-ILTAF, KHAN/0000-0001-8045-697X; Khan, Aftab Aslam Parwaz/0000-0002-3746-5034; KHAN, Dr-ILTAF/0000-0001-8045-697X; Saeed, Muhammad/0000-0002-8759-6948; LUO, MINGSHENG/0000-0001-6124-0946													2044-4753	2044-4761				OCT 18	2021	11	20
J	Schirmbeck, F; van der Burg, NC; Blankers, M; Vermeulen, JM; McGuire, P; Valmaggia, LR; Kempton, MJ; van der Gaag, M; Riecher-Rossler, A; Bressan, RA; Barrantes-Vidal, N; Nelson, B; Amminger, GP; McGorry, P; Pantelis, C; Krebs, MO; Ruhrmann, S; Sachs, G; Rutten, BPF; van Os, J; Nordentoft, M; Glenthoj, B; Fusar-Poli, P; de Haan, L				Schirmbeck, Frederike; van der Burg, Nadine C.; Blankers, Matthijs; Vermeulen, Jentien M.; McGuire, Philip; Valmaggia, Lucia R.; Kempton, Matthew J.; van der Gaag, Mark; Riecher-Rossler, Anita; Bressan, Rodrigo A.; Barrantes-Vidal, Neus; Nelson, Barnaby; Amminger, G. Paul; McGorry, Patrick; Pantelis, Christos; Krebs, Marie-Odile; Ruhrmann, Stephan; Sachs, Gabriele; Rutten, Bart P. F.; van Os, Jim…		EU-GEI High Risk Study Grp Authors	Impact of Comorbid Affective Disorders on Longitudinal Clinical Outcomes in Individuals at Ultra-high Risk for Psychosis	SCHIZOPHRENIA BULLETIN																	Riecher-Rössler, Anita/ABF-5752-2020; Nordholm, Dorte/AAO-9116-2020; van der Gaag, Mark/A-6840-2008; Pantelis, Christos/H-7722-2014; Nelson, Barnaby/ABA-8785-2020; Valmaggia, Lucia/E-9653-2012; Barrantes-Vidal, Neus/A-9578-2013; Monsonet, manel/AAZ-3152-2021; McGorry, Patrick/O-4115-2019; Ruhrmann, Stephan/AAG-9470-2020; Fusar-Poli, Paolo/D-8605-2011	Riecher-Rössler, Anita/0000-0001-6361-8789; Nordholm, Dorte/0000-0002-6383-6169; van der Gaag, Mark/0000-0002-3525-6415; Pantelis, Christos/0000-0002-9565-0238; Nelson, Barnaby/0000-0002-6263-2332; Valmaggia, Lucia/0000-0001-6099-8464; Barrantes-Vidal, Neus/0000-0002-8671-1238; Monsonet, manel/0000-0003-1898-3212; Ruhrmann, Stephan/0000-0002-6022-2364; Fusar-Poli, Paolo/0000-0003-3582-6788; McGui…													0586-7614	1745-1701				JAN	2022	48	1
J	Jeddi, K; Siddique, KHM; Chaieb, M; Hessini, K				Jeddi, Kaouthar; Siddique, Kadambot H. M.; Chaieb, Mohamed; Hessini, Kamel			Physiological and biochemical responses of Lawsonia inermis L. to heavy metal pollution in arid environments	SOUTH AFRICAN JOURNAL OF BOTANY																	Siddique, Kadambot H.M./B-3462-2011	Siddique, Kadambot H.M./0000-0001-6097-4235													0254-6299	1727-9321				DEC	2021	143
J	Fernandes, SR; Barreiros, L; Sa, P; Miro, M; Segundo, MA				Fernandes, Sara R.; Barreiros, Luisa; Sa, Paula; Miro, Manuel; Segundo, Marcela A.			Automatic and renewable micro-solid-phase extraction based on bead injection lab-on-valve system for determination of tranexamic acid in urine by UHPLC coupled with tandem mass spectrometry	ANALYTICAL AND BIOANALYTICAL CHEMISTRY																	Segundo, Marcela A/A-1009-2010; Barreiros, Luisa/D-7950-2013; Sa, Paula Alexandra/L-1878-2015; Miro, Manuel/D-9500-2011	Segundo, Marcela A/0000-0003-2938-0214; Barreiros, Luisa/0000-0003-3481-5809; Fernandes, Sara/0000-0001-7042-1941; Sa, Paula Alexandra/0000-0002-2055-3759; Miro, Manuel/0000-0002-8413-3008													1618-2642	1618-2650				JAN	2022	414	1
J	Kang, JJ; Zhao, WZ; Zhang, CX; Wang, ZW; Li, H				Kang, Jianjun; Zhao, Wen Zhi; Zhang, Cai Xia; Wang, Zhiwei; Li, Hong			Silicon accumulation by Phragmites australis positively responds to rise in groundwater depth in the desert oasis areas of the HeXi Corridor, China	LAND DEGRADATION & DEVELOPMENT																															1085-3278	1099-145X				SEP	2021	32	15
J	Somoano, M; Battistella, T; Rodriguez-Luis, A; Fernandez-Ruano, S; Guanche, R				Somoano, M.; Battistella, T.; Rodriguez-Luis, A.; Fernandez-Ruano, S.; Guanche, R.			Influence of turbulence models on the dynamic response of a semi-submersible floating offshore wind platform	OCEAN ENGINEERING																	SOMOANO, MIGUEL/A-2514-2019; Guanche, Raul/AAO-1515-2021; Rodríguez-Luis, Álvaro/AAE-2709-2021	SOMOANO, MIGUEL/0000-0002-1666-1079; Guanche, Raul/0000-0001-9768-1727; Rodríguez-Luis, Álvaro/0000-0002-7841-7688; Fernandez Ruano, Sergio/0000-0002-0518-2902													0029-8018	1873-5258				OCT 1	2021	237
J	Zhou, JJ; Zhao, X; Wu, JY; Huang, JM; Qiu, DD; Xue, DX; Li, QQ; Liu, CF; Wei, W; Zhang, DX; Yang, XM				Zhou, Junju; Zhao, Xi; Wu, Jinyan; Huang, Jumei; Qiu, Dongdong; Xue, Dongxiang; Li, Qiaoqiao; Liu, Chunfang; Wei, Wei; Zhang, Dongxia; Yang, Xuemei			Wind speed changes and influencing factors in inland river basin of monsoon marginal zone	ECOLOGICAL INDICATORS																	zhao, xi/HJY-6017-2023; Qiu, Dongdong/GRY-4366-2022														1470-160X	1872-7034				NOV	2021	130
J	Ali, A; Liaqat, S; Tariq, H; Abbas, S; Arshad, M; Li, WJ; Ahmed, I				Ali, Ahmad; Liaqat, Sidra; Tariq, Hamza; Abbas, Saira; Arshad, Muhammad; Li, Wen-Jun; Ahmed, Iftikhar			Neonatal calf diarrhea: A potent reservoir of multi-drug resistant bacteria, environmental contamination and public health hazard in Pakistan	SCIENCE OF THE TOTAL ENVIRONMENT																	Ahmed, Iftikhar/B-4694-2009	Ahmed, Iftikhar/0000-0003-0969-7927													0048-9697	1879-1026				DEC 10	2021	799
J	de Pablo, GS; Solmi, M; Vaquerizo-Serrano, J; Radua, J; Passina, A; Mosillo, P; Correll, CU; Borgwardt, S; Galderisi, S; Bechdolf, A; Pfennig, A; Bauer, M; Kessing, LV; van Amelsvoort, T; Nieman, DH; Domschke, K; Krebs, MO; Sand, M; Vieta, E; McGuire, P; Arango, C; Il Shin, J; Fusar-Poli, P				de Pablo, Gonzalo Salazar; Solmi, Marco; Vaquerizo-Serrano, Julio; Radua, Joaquim; Passina, Anastassia; Mosillo, Pierluca; Correll, Christoph U.; Borgwardt, Stefan; Galderisi, Silvana; Bechdolf, Andreas; Pfennig, Andrea; Bauer, Michael; Kessing, Lars Vedel; van Amelsvoort, Therese; Nieman, Dorien H.; Domschke, Katharina; Krebs, Marie-Odile; Sand, Michael; Vieta, Eduard; McGuire, Philip; Arango, C…			Primary prevention of depression: An umbrella review of controlled interventions	JOURNAL OF AFFECTIVE DISORDERS																	Correll, Christoph/D-3530-2011; Krebs, Marie-Odile/O-2104-2017; SHIN, JAE IL/J-6922-2017; Arango, Celso/AAZ-8314-2021; Solmi, Marco/K-3906-2018; Radua, Joaquim/H-6424-2019; Vieta, Eduard/I-6330-2013; Fusar-Poli, Paolo/D-8605-2011; Borgwardt, Stefan/Q-6168-2018	Correll, Christoph/0000-0002-7254-5646; Krebs, Marie-Odile/0000-0002-4715-9890; SHIN, JAE IL/0000-0003-2326-1820; Arango, Celso/0000-0003-3382-4754; Solmi, Marco/0000-0003-4877-7233; Radua, Joaquim/0000-0003-1240-5438; McGuire, Philip/0000-0003-4381-0532; Vieta, Eduard/0000-0002-0548-0053; Fusar-Poli, Paolo/0000-0003-3582-6788; Salazar de Pablo, Gonzalo/0000-0002-6992-0767; Borgwardt, Stefan/0000…													0165-0327	1573-2517				NOV 1	2021	294
J	Wu, JF; Dong, QX; Gui, J; Zhang, J; Su, Y; Chen, KW; Thompson, PM; Caselli, RJ; Reiman, EM; Ye, JP; Wang, YL				Wu, Jianfeng; Dong, Qunxi; Gui, Jie; Zhang, Jie; Su, Yi; Chen, Kewei; Thompson, Paul M.; Caselli, Richard J.; Reiman, Eric M.; Ye, Jieping; Wang, Yalin			Predicting Brain Amyloid Using Multivariate Morphometry Statistics, Sparse Coding, and Correntropy: Validation in 1,101 Individuals From the ADNI and OASIS Databases	FRONTIERS IN NEUROSCIENCE																	Thompson, Paul M/C-4194-2018	Thompson, Paul M/0000-0002-4720-8867														1662-453X				AUG 6	2021	15
J	Yu, QH; Kang, SZ; Hu, SJ; Zhang, L; Zhang, XT				Yu, Qihua; Kang, Shaozhong; Hu, Shunjun; Zhang, Lu; Zhang, Xiaotao			Modeling soil water-salt dynamics and crop response under severely saline condition using WAVES: Searching for a target irrigation volume for saline water irrigation	AGRICULTURAL WATER MANAGEMENT																															0378-3774	1873-2283				OCT 1	2021	256
J	Yuan, Y; Bao, AM; Liu, T; Zheng, GX; Jiang, LL; Guo, H; Jiang, P; Yu, T; De Maeyer, P				Yuan, Ye; Bao, Anming; Liu, Tie; Zheng, Guoxiong; Jiang, Liangliang; Guo, Hao; Jiang, Ping; Yu, Tao; De Maeyer, Philippe			Assessing vegetation stability to climate variability in Central Asia	JOURNAL OF ENVIRONMENTAL MANAGEMENT																	Guo, Hao/AAD-8959-2022; jiang, ping/GXF-8339-2022; Zheng, Guoxiong/AAX-3597-2021	Zheng, Guoxiong/0000-0002-9126-8357													0301-4797	1095-8630				NOV 15	2021	298
J	Banerjee, S; Zhao, C; Kirkby, CA; Coggins, S; Zhao, S; Bissett, A; van der Heijden, MGA; Kirkegaard, JA; Richardson, AE				Banerjee, Samiran; Zhao, Cheng; Kirkby, Clive A.; Coggins, Sam; Zhao, Shuai; Bissett, Andrew; Heijden, Marcel G. A. van der; Kirkegaard, John A.; Richardson, Alan E.			Microbial interkingdom associations across soil depths reveal network connectivity and keystone taxa linked to soil fine-fraction carbon content	AGRICULTURE ECOSYSTEMS & ENVIRONMENT																	Kirkegaard, John/A-1449-2010; Richardson, Alan/I-1903-2012; Bissett, Andrew/AFR-3887-2022; van der Heijden, Marcel/AAY-1593-2021	Kirkegaard, John/0000-0001-5982-9508; Richardson, Alan/0000-0003-0708-1299; Bissett, Andrew/0000-0001-7396-1484; van der Heijden, Marcel/0000-0001-7040-1924													0167-8809	1873-2305				OCT 15	2021	320
J	Jain, M; Rai, CS; Jain, J				Jain, Manju; Rai, C. S.; Jain, Jai			A Novel Method for Differential Prognosis of Brain Degenerative Diseases Using Radiomics-Based Textural Analysis and Ensemble Learning Classifiers	COMPUTATIONAL AND MATHEMATICAL METHODS IN MEDICINE																		Jain, Manju/0000-0001-9676-5910													1748-670X	1748-6718				AUG 5	2021	2021
J	Alazaiza, MYD; Albahnasawi, A; Ali, GAM; Bashir, MJK; Copty, NK; Abu Amr, SS; Abushammala, MFM; Al Maskari, T				Alazaiza, Motasem Y. D.; Albahnasawi, Ahmed; Ali, Gomaa A. M.; Bashir, Mohammed J. K.; Copty, Nadim K.; Abu Amr, Salem S.; Abushammala, Mohammed F. M.; Al Maskari, Tahra			Recent Advances of Nanoremediation Technologies for Soil and Groundwater Remediation: A Review	WATER																	Ali, Gomaa A.M./I-5067-2013; Albahnasawi, Ahmed/AAS-9740-2020; Copty, Nadim K/Q-2749-2015; Abu Amr, salem/I-3614-2019; Al Maskari, Tahra/AAA-6307-2022; Alazaiza, Motasem/AAS-7007-2020; JK Bashir, Mohammed/I-1132-2014	Ali, Gomaa A.M./0000-0002-7152-531X; Albahnasawi, Ahmed/0000-0002-4343-4760; Copty, Nadim K/0000-0002-4807-7790; Abu Amr, salem/0000-0003-0589-1490; Alazaiza, Motasem/0000-0001-6957-4131; JK Bashir, Mohammed/0000-0002-3086-0568														2073-4441				AUG	2021	13	16
J	Cai, TY; Zhang, XH; Xia, FQ; Zhang, ZP; Yin, JJ; Wu, SQ				Cai, Tianyi; Zhang, Xinhuan; Xia, Fuqiang; Zhang, Zhiping; Yin, Jingjing; Wu, Shengqin			The Process-Mode-Driving Force of Cropland Expansion in Arid Regions of China Based on the Land Use Remote Sensing Monitoring Data	REMOTE SENSING																																2072-4292				AUG	2021	13	15
J	Feng, S; Ma, L; Abuduwaili, J; Liu, W; Saparov, G; Issanova, G				Feng, Sen; Ma, Long; Abuduwaili, Jilili; Liu, Wen; Saparov, Galymzhan; Issanova, Gulnura			Organic Carbon Burial in the Aral Sea of Central Asia	APPLIED SCIENCES-BASEL																		Ma, Long/0000-0002-8233-8640; ji, li li/0000-0001-8483-1554; Liu, Wen/0000-0002-5524-0496														2076-3417				AUG	2021	11	15
J	Haj-Amor, Z; Acharjee, TK				Haj-Amor, Zied; Acharjee, Tapos Kumar			Effect of irrigation efficiency enhancement on water demand of date palms in a Tunisian oasis under climate change	JOURNAL OF WATER AND CLIMATE CHANGE																		Acharjee, Tapos Kumar/0000-0002-5303-3434													2040-2244	2408-9354				AUG	2021	12	5
J	Li, L; Gao, L; Liu, YH; Fang, BZ; Huang, Y; Mohamad, OAA; Egamberdieva, D; Li, WJ; Ma, JB				Li Li; Gao Lei; Liu Yonghong; Fang Baozhu; Huang Yin; Mohamad, Osama A. A.; Egamberdieva, Dilfuza; Li Wenjun; Ma Jinbiao			Diversity of cultivable endophytic bacteria associated with halophytes in Xinjiang of China and their plant beneficial traits	JOURNAL OF ARID LAND																	Abdalla Abdelshafy Mohamad, Osama/GGS-3886-2022; Egamberdieva, Dilfuza/A-1349-2014	Abdalla Abdelshafy Mohamad, Osama/0000-0002-2234-8273; Egamberdieva, Dilfuza/0000-0001-9811-9277													1674-6767	2194-7783				AUG	2021	13	8
J	Lopez-Olmos, V; Luna-Luna, M; Carreon-Torres, E; Gonzalez-Pacheco, H; Bautista-Perez, R; Posadas-Sanchez, R; Fragoso, JM; Vargas-Alarcon, G; Perez-Mendez, O				Lopez-Olmos, Victoria; Luna-Luna, Maria; Carreon-Torres, Elizabeth; Gonzalez-Pacheco, Hector; Bautista-Perez, Rocio; Posadas-Sanchez, Rosalinda; Manuel Fragoso, Jose; Vargas-Alarcon, Gilberto; Perez-Mendez, Oscar			Trp Fluorescence Redshift during HDL Apolipoprotein Denaturation Is Increased in Patients with Coronary Syndrome in Acute Phase: A New Assay to Evaluate HDL Stability	INTERNATIONAL JOURNAL OF MOLECULAR SCIENCES																		Luna Luna, Maria/0000-0003-3914-9366; Posadas-Sanchez, Rosalinda/0000-0001-8467-3488; Carreon-Torres, Elizabeth/0000-0003-3600-249X; Vargas-Alarcon, Gilberto/0000-0001-7916-5163; Gonzalez-Pacheco, Hector/0000-0002-4370-9963; Jose Manuel, Fragoso/0000-0003-3137-7815														1422-0067				AUG	2021	22	15
J	Maafi, O; Revilla, P; Alvarez-Iglesias, L; Malvar, RA; Djemel, A				Maafi, Oula; Revilla, Pedro; Alvarez-Iglesias, Lorena; Malvar, Rosa Ana; Djemel, Abderahmane			Adaptation assessment of drought tolerance in maize populations from the Sahara in both shores of the Mediterranean Sea	EUPHYTICA																	Malvar, Rosa/E-7926-2012; Alvarez-Iglesias, Lorena/W-8565-2019; Revilla, Pedro/K-5974-2014	Malvar, Rosa/0000-0001-7915-4675; Alvarez-Iglesias, Lorena/0000-0002-0815-6486; Revilla, Pedro/0000-0002-4826-6073													0014-2336	1573-5060				AUG	2021	217	8
J	Matallah, ME; Mahar, WA; Bughio, M; Alkama, D; Ahriz, A; Bouzaher, S				Matallah, Mohamed Elhadi; Mahar, Waqas Ahmed; Bughio, Mushk; Alkama, Djamel; Ahriz, Atef; Bouzaher, Soumia			Prediction of Climate Change Effect on Outdoor Thermal Comfort in Arid Region	ENERGIES																	Matallah, Mohamed Elhadi/AGA-4503-2022; Mahar, Waqas Ahmed/W-5991-2018; ahriz, atef/M-1047-2017	Mahar, Waqas Ahmed/0000-0003-1478-6246; ahriz, atef/0000-0001-5891-0275; Bughio, Mushk/0000-0001-6446-5622; ALKAMA, Djamel/0000-0002-3565-6451; Matallah, Mohamed Elhadi/0000-0002-2089-8044														1996-1073				AUG	2021	14	16
J	Spinelli, A; Laurenti, V; Carrano, FM; Gonzalez-Diaz, E; Borycka-Kiciak, K				Spinelli, Antonino; Laurenti, Virginia; Carrano, Francesco Maria; Gonzalez-Diaz, Enrique; Borycka-Kiciak, Katarzyna			Diagnosis and Treatment of Obstetric Anal Sphincter Injuries: New Evidence and Perspectives	JOURNAL OF CLINICAL MEDICINE																	Spinelli, Antonino/ABI-1441-2020; Carrano, Francesco Maria/AAB-6807-2021; Gonzalez-Diaz, Enrique/H-7383-2016	Spinelli, Antonino/0000-0002-1493-1768; Carrano, Francesco Maria/0000-0003-1189-9907; Borycka-Kiciak, Katarzyna/0000-0001-6022-2906; Gonzalez-Diaz, Enrique/0000-0002-4528-2473														2077-0383				AUG	2021	10	15
J	Su, ZH; Zhou, XB; Zhou, L; Jiang, XL; Kang, XS				Su, Zhihao; Zhou, Xiaobing; Zhou, Li; Jiang, Xiaolong; Kang, Xiaoshan			POPULATION STRUCTURE AND DYNAMICS OF AN ENDANGERED DESERT SHRUB ENDEMIC TO NORTHWESTERN CHINA	PAKISTAN JOURNAL OF BOTANY																															0556-3321	2070-3368				AUG	2021	53	4
J	Wu, YF; Gao, XP; Cao, DC; Li, L; Li, XY; Zeng, FJ				Wu, Yufeng; Gao, Xiaopeng; Cao, Dengchao; Li, Lei; Li, Xiangyi; Zeng, Fanjiang			Nitrous Oxide Emissions from an Alpine Grassland as Affected by Nitrogen Addition	ATMOSPHERE																	Gao, Xiaopeng/AAE-9242-2020	Gao, Xiaopeng/0000-0002-6970-866X														2073-4433				AUG	2021	12	8
J	Akhigbe, RE; Hamed, MA; Odetayo, AF; Akhigbe, TM; Ajayi, AF; Ajibogun, FAH				Akhigbe, R. E.; Hamed, M. A.; Odetayo, A. F.; Akhigbe, T. M.; Ajayi, A. F.; Ajibogun, F. A. H.			Omega-3 fatty acid rescues ischaemia/perfusion-induced testicular and sperm damage via modulation of lactate transport and xanthine oxidase/uric acid signaling	BIOMEDICINE & PHARMACOTHERAPY																	Hamed, Moses/CAH-6613-2022	Hamed, Moses/0000-0003-3378-6794													0753-3322	1950-6007				OCT	2021	142
J	Cobo-Golpe, M; De-Castro-Rios, A; Cruz, A; Paramo, M; Lopez-Rivadulla, M; Lendoiro, E				Cobo-Golpe, Maria; De-Castro-Rios, Ana; Cruz, Angelines; Paramo, Mario; Lopez-Rivadulla, Manuel; Lendoiro, Elena			Determination of antidepressants and benzodiazepines in paired hair and nail samples	FORENSIC SCIENCE INTERNATIONAL																	Cobo-Golpe, María/AAU-2904-2021; de-Castro-Rios, Ana/M-5159-2015	Cobo-Golpe, María/0000-0002-3158-6118; de-Castro-Rios, Ana/0000-0002-9832-012X													0379-0738	1872-6283				SEP	2021	326
J	Li, YZ; Ma, L; Li, YM; Uulu, SA; Abuduwaili, J				Li, Yizhen; Ma, Long; Li, Yaoming; Uulu, Salamat Abdyzhapar; Abuduwaili, Jilili			Exploration of the driving factors and distribution of fecal coliform in rivers under a traditional agro-pastoral economy in Kyrgyzstan, Central Asia	CHEMOSPHERE																		Ma, Long/0000-0002-8233-8640													0045-6535	1879-1298				JAN	2022	286		2
J	Rajivgandhi, G; Vimala, RTV; Maruthupandy, M; Alharbi, NS; Kadaikunnan, S; Khaled, JM; Manoharan, N; Li, WJ				Rajivgandhi, Govindan; Vimala, R. T. V.; Maruthupandy, Muthuchamy; Alharbi, Naiyf S.; Kadaikunnan, Shine; Khaled, Jamal M.; Manoharan, Natesan; Li, Wen-Jun			Enlightening the characteristics of bioflocculant of endophytic actinomycetes from marine algae and its biosorption of heavy metal removal	ENVIRONMENTAL RESEARCH																	Muthuchamy, Maruthupandy/R-2689-2019; Govindan, Rajivgandhi/ABG-5120-2021; Khaled, Jamal Mohammed Ali/D-8188-2017; Alharbi, Naiyf S/B-9402-2019; Kadaikunnan, Shine/L-2836-2013	Govindan, Rajivgandhi/0000-0003-4907-8100; Khaled, Jamal Mohammed Ali/0000-0003-2442-0790; Alharbi, Naiyf S/0000-0001-5820-9649; Kadaikunnan, Shine/0000-0001-7018-5379; RTV, vimala/0000-0003-1797-4365													0013-9351	1096-0953				SEP	2021	200
J	de Pablo, GS; Davies, C; de Diego, H; Solmi, M; Shin, JI; Carvalho, AF; Radua, J; Fusar-Poli, P				de Pablo, Gonzalo Salazar; Davies, Cathy; de Diego, Hector; Solmi, Marco; Shin, Jae Il; Carvalho, Andre F.; Radua, Joaquim; Fusar-Poli, Paolo			Transition to psychosis in randomized clinical trials of individuals at clinical high risk of psychosis compared to observational cohorts: a systematic review and meta-analysis	EUROPEAN PSYCHIATRY																	Davies, Cathy/K-8467-2013; SHIN, JAE IL/ABD-9660-2021; SHIN, JAE IL/J-6922-2017; Solmi, Marco/K-3906-2018; Radua, Joaquim/H-6424-2019	Davies, Cathy/0000-0003-3011-8643; SHIN, JAE IL/0000-0003-2326-1820; SHIN, JAE IL/0000-0003-2326-1820; Solmi, Marco/0000-0003-4877-7233; Radua, Joaquim/0000-0003-1240-5438; De Diego Ruiz, Hector/0000-0002-7421-738X; Salazar de Pablo, Gonzalo/0000-0002-6992-0767; Carvalho, Andre/0000-0002-2500-5671													0924-9338	1778-3585				JUL 28	2021	64	1
J	Hou, P; Liu, YE; Liu, WM; Yang, HS; Xie, RZ; Wang, KR; Ming, B; Liu, GZ; Xue, J; Wang, YH; Zhao, RL; Zhang, WJ; Wang, YJ; Bian, SF; Ren, H; Zhao, XY; Liu, P; Chang, JZ; Zhang, GH; Liu, JY; Yuan, LZ; Zhao, HY; Shi, L; Zhang, LL; Yu, L; Gao, JL; Yu, XF; Wang, ZG; Shen, LG; Ji, P; Yang, SZ; Zhang, ZD; Xue, JQ; Ma, XF; Wang, XQ; Lu, TQ; Dong, BC; Li, G; Ma, BX; Li, JQ; Deng, XF; Liu, YH; Yang, Q; Jia…				Hou, Peng; Liu, Yuee; Liu, Wanmao; Yang, Haishun; Xie, Ruizhi; Wang, Keru; Ming, Bo; Liu, Guangzhou; Xue, Jun; Wang, Yonghong; Zhao, Rulang; Zhang, Wenjie; Wang, Yongjun; Bian, Shaofeng; Ren, Hong; Zhao, Xiaoyan; Liu, Peng; Chang, Jianzhi; Zhang, Guohe; Liu, Jiayou; Yuan, Liuzheng; Zhao, Haiyan; Shi, Lei; Zhang, Lili; Yu, Lin; Gao, Julin; Yu, Xiaofang; Wang, Zhigang; Shen, Liguo; Ji, Ping; Yang, …			Quantifying maize grain yield losses caused by climate change based on extensive field data across China	RESOURCES CONSERVATION AND RECYCLING																	ming, bo/AGG-3276-2022; Lin, Hongjun/G-8462-2011; Ming, Bo/ABF-5354-2021; Shen, Liguo/A-4051-2019	ming, bo/0000-0002-5384-8617; Lin, Hongjun/0000-0003-1125-0681; Ming, Bo/0000-0002-5384-8617; Shen, Liguo/0000-0001-9730-3451; Hou, Peng/0000-0002-1592-1473													0921-3449	1879-0658				NOV	2021	174
J	Xia, H; Riaz, M; Zhang, MY; Liu, B; Li, YX; El-Desouki, Z; Jiang, CC				Xia, Hao; Riaz, Muhammad; Zhang, Mengyang; Liu, Bo; Li, Yuxuan; El-Desouki, Zeinab; Jiang, Cuncang			Biochar-N fertilizer interaction increases N utilization efficiency by modifying soil C/N component under N fertilizer deep placement modes	CHEMOSPHERE																	Li, Yuxuan/GWC-8159-2022	zhang, mengyang/0000-0002-7761-2780													0045-6535	1879-1298				JAN	2022	286		1
J	Hare, ML; Xu, XW; Wang, YD; Yuan, Y; Gedda, AE				Hare, Malicha Loje; Xu, Xin Wen; Wang, Yong Dong; Yuan, You; Gedda, Abule Ebro			Do Woody Tree Thinning and Season Have Effect on Grass Species' Composition and Biomass in a Semi-Arid Savanna? The Case of a Semi-Arid Savanna, Southern Ethiopia	FRONTIERS IN ENVIRONMENTAL SCIENCE																																2296-665X				JUL 27	2021	9
J	Shi, L; Halik, U; Mamat, Z; Aishan, T; Welp, M				Shi, Lei; Halik, Umut; Mamat, Zulpiya; Aishan, Tayierjiang; Welp, Martin			Identifying mismatches of ecosystem services supply and demand under semi-arid conditions: The case of the Oasis City Urumqi, China	INTEGRATED ENVIRONMENTAL ASSESSMENT AND MANAGEMENT																	Halik, Ümüt/H-5150-2019	Halik, Ümüt/0000-0003-0533-8759; Aishan, Tayierjiang/0000-0002-0213-0680													1551-3777	1551-3793				NOV	2021	17	6
J	Li, YZ; Ma, L; Abuduwaili, J; Li, YM; Uulu, SA				Li, Yizhen; Ma, Long; Abuduwaili, Jilili; Li, Yaoming; Abdyzhapar Uulu, Salamat			Spatiotemporal Distributions of Fluoride and Arsenic in Rivers with the Role of Mining Industry and Related Human Health Risk Assessments in Kyrgyzstan	EXPOSURE AND HEALTH																		Ma, Long/0000-0002-8233-8640													2451-9766	2451-9685				MAR	2022	14	1
J	Vazquez, R; Parras-Berrocal, I; Cabos, W; Sein, DV; Mananes, R; Izquierdo, A				Vazquez, Ruben; Parras-Berrocal, Ivan; Cabos, William; Sein, Dmitry V.; Mananes, Rafael; Izquierdo, Alfredo			Assessment of the Canary current upwelling system in a regionally coupled climate model	CLIMATE DYNAMICS																	Sein, Dmitry V/GLS-0252-2022; Sein, Dmitry/P-6419-2018; Cabos Narvaez, William David/L-7374-2014	Parras Berrocal, Ivan Manuel/0000-0003-4659-3924; Sein, Dmitry/0000-0002-1190-3622; Vazquez, Ruben/0000-0002-8910-5583; Cabos Narvaez, William David/0000-0003-3638-6438													0930-7575	1432-0894				JAN	2022	58	1-2
J	Ftouhi, H; Saidani, MA; Bossenbroek, L; Hamamouche, MF; Kadiri, Z				Ftouhi, Hind; Saidani, Mohamed Amine; Bossenbroek, Lisa; Hamamouche, Meriem Farah; Kadiri, Zakaria			Between vulnerability and resilience: the experience of the Covid-19 pandemic in two oasis societies in the Maghreb region	CAHIERS AGRICULTURES																															1166-7699	1777-5949				JUL 21	2021	30
J	Sarraf, M; Jemni, M; Kahramanoglu, I; Artes, F; Shahkoomahally, S; Namsi, A; Ihtisham, M; Brestic, M; Mohammadi, M; Rastogi, A				Sarraf, Mohammad; Jemni, Monia; Kahramanoglu, Ibrahim; Artes, Francisco; Shahkoomahally, Shirin; Namsi, Ahmad; Ihtisham, Muhammad; Brestic, Marian; Mohammadi, Mostafa; Rastogi, Anshu			Commercial techniques for preserving date palm (Phoenix dactylifera) fruit quality and safety: A review	SAUDI JOURNAL OF BIOLOGICAL SCIENCES																	Sarraf, Mohammad/AAE-4115-2021; Calero, Francisco Artes/C-8523-2017; rastogi, Anshu/F-3003-2013; Brestic, Marian/A-8263-2012; Rastogi, Anshu/AID-9227-2022; Kahramanoglu, Ibrahim/A-8628-2014; Mohammadi, Mostafa/B-2433-2017	Sarraf, Mohammad/0000-0001-6279-5820; rastogi, Anshu/0000-0002-0953-7045; Brestic, Marian/0000-0003-3470-6100; Rastogi, Anshu/0000-0002-0953-7045; Kahramanoglu, Ibrahim/0000-0002-6074-6395; Mohammadi, Mostafa/0000-0003-1789-9967; ARTES, FRANCISCO/0000-0003-3984-3112; Jemni, Monia/0000-0003-0202-0913; Namsi, Ahmed/0000-0003-3493-8788													1319-562X	2213-7106				AUG	2021	28	8
J	Patel, RB; Shah, SJ				Patel, Ravi B.; Shah, Sanjiv J.			The splanchnic reservoir: an oasis for blood volume in heart failure with preserved ejection fraction?	EUROPEAN JOURNAL OF HEART FAILURE																	Shah, Sanjiv J./AFQ-9480-2022														1388-9842	1879-0844				JUL	2021	23	7
J	Ammar, I; El Touati, Y; Yeddes, M; Mullins, J				Ammar, Ikhlass; El Touati, Yamen; Yeddes, Moez; Mullins, John			Bounded opacity for timed systems	JOURNAL OF INFORMATION SECURITY AND APPLICATIONS																		ammar, ikhlass/0000-0001-6487-3538; El Touati, Yamen/0000-0003-2371-3647													2214-2126	2214-2134				SEP	2021	61
J	Das, P; Neelima, A				Das, P.; Neelima, A.			A Robust Feature Descriptor for Biomedical Image Retrieval	IRBM																	Das, Dr. Pranjit/HHR-8315-2022	Das, Dr. Pranjit/0000-0001-5654-9463													1959-0318	1876-0988				AUG	2021	42	4
J	Xu, GQ; Farrell, C; Arndt, SK				Xu, Gui-Qing; Farrell, Claire; Arndt, Stefan K.			Climate of origin has no influence on drought adaptive traits and the drought responses of a widely distributed polymorphic shrub	TREE PHYSIOLOGY																	Arndt, Stefan/G-5021-2013	Arndt, Stefan/0000-0001-7086-9375													0829-318X	1758-4469				JAN	2022	42	1
J	Dhiab, O; Selmi, S				Dhiab, Oumayma; Selmi, Slaheddine			Patterns of vertebrate road-kills in a pre-Saharan Tunisian area	JOURNAL OF ARID ENVIRONMENTS																		Selmi, Slaheddine/0000-0002-7204-9159													0140-1963	1095-922X				OCT	2021	193
J	Zhu, GF; Yong, LL; Zhang, ZX; Sun, ZG; Wan, QZ; Xu, YX; Ma, HY; Sang, LY; Liu, YW; Wang, L; Zhao, KL; Guo, HW				Zhu, Guofeng; Yong, Leilei; Zhang, Zhuanxia; Sun, Zhigang; Wan, Qiaozhuo; Xu, Yuanxiao; Ma, Huiying; Sang, Liyuan; Liu, Yuwei; Wang, Lei; Zhao, Kailiang; Guo, Huiwen			Effects of plastic mulch on soil water migration in arid oasis farmland: Evidence of stable isotopes	CATENA																															0341-8162	1872-6887				DEC	2021	207
J	Ajayi, AF; Akhigbe, RE				Ajayi, A. F.; Akhigbe, R. E.			Apoptotic inducement of neuronal cells by codeine: possible role of disrupted redox state and caspase 3 signaling	HELIYON																		Akhigbe, Roland/0000-0002-3874-5927														2405-8440				JUL	2021	7	7
J	Calvano, M; Mancini, MF				Calvano, Michele; Mancini, Matteo Flavio			Testing and Defining a Complex Design Through Digital and Physical Models	NEXUS NETWORK JOURNAL																		Mancini, Matteo Flavio/0000-0002-4519-1053													1590-5896	1522-4600				DEC	2021	23	4
J	Tahoun, IF; Gab-Allah, MA; Yamani, RN; Shehata, AB				Tahoun, Ibrahim F.; Gab-Allah, Mohamed A.; Yamani, Randa N.; Shehata, Adel B.			Development and validation of a reliable LC-MS/MS method for simultaneous determination of deoxynivalenol and T-2 toxin in maize and oats	MICROCHEMICAL JOURNAL																		Tahoun, Ibrahim/0000-0002-0482-6198													0026-265X	1095-9149				OCT	2021	169
J	Wang, TY; Wang, ZH; Guo, L; Zhang, JZ; Li, WH; He, HJ; Zong, R; Wang, DW; Jia, ZC; Wen, Y				Wang, Tianyu; Wang, Zhenhua; Guo, Li; Zhang, Jinzhu; Li, Wenhao; He, Huaijie; Zong, Rui; Wang, Dongwang; Jia, Zhecheng; Wen, Yue			Experiences and challenges of agricultural development in an artificial oasis: A review	AGRICULTURAL SYSTEMS																	Guo, Li/B-7820-2016	Guo, Li/0000-0003-3821-4058; Wen, Yue/0000-0002-0238-3098													0308-521X	1873-2267				OCT	2021	193
J	Zheng, GX; Mergili, M; Emmer, A; Allen, S; Bao, AM; Guo, H; Stoffel, M				Zheng, Guoxiong; Mergili, Martin; Emmer, Adam; Allen, Simon; Bao, Anming; Guo, Hao; Stoffel, Markus			The 2020 glacial lake outburst flood at Jinwuco, Tibet: causes, impacts, and implications for hazard and risk assessment	CRYOSPHERE																	Zheng, Guoxiong/AAX-3597-2021; Emmer, Adam/P-5500-2014; Guo, Hao/AAD-8959-2022; Stoffel, Markus/A-1793-2017; Guo, Hao/M-1304-2017	Zheng, Guoxiong/0000-0002-9126-8357; Emmer, Adam/0000-0002-8268-990X; Stoffel, Markus/0000-0003-0816-1303; Guo, Hao/0000-0003-0036-8879; Mergili, Martin/0000-0001-5085-4846													1994-0416	1994-0424				JUL 9	2021	15	7
J	Li, JY; Chen, X; Kurban, A; Van de Voorde, T; De Maeyer, P; Zhang, C				Li, Jiangyue; Chen, Xi; Kurban, Alishir; Van de Voorde, Tim; De Maeyer, Philippe; Zhang, Chi			Coupled SSPs-RCPs scenarios to project the future dynamic variations of water-soil-carbon-biodiversity services in Central Asia	ECOLOGICAL INDICATORS																	Kurban, Alishir/AGK-9193-2022; Zhang, Chi/ABB-1176-2021; Van de Voorde, Tim/AAG-1657-2019	Kurban, Alishir/0000-0001-9387-8127; Zhang, Chi/0000-0003-4866-1441; Van de Voorde, Tim/0000-0002-9324-5087; Li, Jiangyue/0000-0002-1417-2853													1470-160X	1872-7034				OCT	2021	129
J	Nzabarinda, V; Bao, AM; Xu, WQ; Uwamahoro, S; Huang, XR; Gao, ZQ; Umugwaneza, A; Kayumba, PM; Maniraho, AP; Jiang, ZP				Nzabarinda, Vincent; Bao, Anming; Xu, Wenqiang; Uwamahoro, Solange; Huang, Xiaoran; Gao, Ziqian; Umugwaneza, Adeline; Kayumba, Patient Mindje; Maniraho, Albert Poponi; Jiang, Zhanpeng			Impact of cropland development intensity and expansion on natural vegetation in different African countries	ECOLOGICAL INFORMATICS																	NZABARINDA, Vincent/AAL-9994-2021	NZABARINDA, Vincent/0000-0002-1591-1574; UWAMAHORO, Solange/0000-0002-2515-7616													1574-9541	1878-0512				SEP	2021	64
J	Bourguiba, H; Batnini, MA; Naccache, C; Zitouna, N; Trifi-Farah, N; Audergon, JM; Krichen, L				Bourguiba, Hedia; Batnini, Mohamed-Amine; Naccache, Chahnez; Zitouna, Nadia; Trifi-Farah, Neila; Audergon, Jean-Marc; Krichen, Lamia			Chloroplastic and nuclear diversity of endemic Prunus armeniaca L. species in the oasis agroecosystems	GENETICA																		naccache, chahnez/0000-0001-6853-6192; Bourguiba, Hedia/0000-0003-1260-9545; Krichen, Lamia/0000-0001-9180-6322													0016-6707	1573-6857				AUG	2021	149	4
J	Akhigbe, RE; Hamed, MA				Akhigbe, R. E.; Hamed, M. A.			Co-administration of HAART and antikoch triggers cardiometabolic dysfunction through an oxidative stress-mediated pathway	LIPIDS IN HEALTH AND DISEASE																	Hamed, Moses/CAH-6613-2022	Hamed, Moses/0000-0003-3378-6794; Akhigbe, Roland/0000-0002-3874-5927														1476-511X				JUL 5	2021	20	1
J	Jiang, LG; Liu, Y; Wu, S; Yang, C				Jiang, Luguang; Liu, Ye; Wu, Si; Yang, Cheng			Analyzing ecological environment change and associated driving factors in China based on NDVI time series data	ECOLOGICAL INDICATORS																		Jiang, Luguang/0000-0001-5948-7667; Liu, Ye/0000-0002-0377-8956													1470-160X	1872-7034				OCT	2021	129
J	Zhang, ZP; Ding, JL; Zhu, CM; Chen, XY; Wang, JZ; Han, LJ; Ma, X; Xu, D				Zhang, Zipeng; Ding, Jianli; Zhu, Chuanmei; Chen, Xiangyue; Wang, Jingzhe; Han, Lijing; Ma, Xu; Xu, Dong			Bivariate empirical mode decomposition of the spatial variation in the soil organic matter content: A case study from NW China	CATENA																	徐, 栋/GQY-5626-2022; Wang, Jingzhe/Q-4555-2019	Xu, Dong/0000-0001-8292-3498; Ding, Jianli/0000-0001-9329-9424; Ma, Xu/0000-0003-0644-7498													0341-8162	1872-6887				NOV	2021	206
J	Antor, MB; Jamil, AHMS; Mamtaz, M; Khan, MM; Aljahdali, S; Kaur, M; Singh, P; Masud, M				Bari Antor, Morshedul; Jamil, A. H. M. Shafayet; Mamtaz, Maliha; Monirujjaman Khan, Mohammad; Aljahdali, Sultan; Kaur, Manjit; Singh, Parminder; Masud, Mehedi			A Comparative Analysis of Machine Learning Algorithms to Predict Alzheimer's Disease	JOURNAL OF HEALTHCARE ENGINEERING																	Masud, Mehedi/AAZ-7022-2020; kaur, manjit/J-2846-2019; Aljahdali, Sultan/AAH-9712-2019; Singh, Parminder/GQZ-8220-2022	Masud, Mehedi/0000-0001-6019-7245; kaur, manjit/0000-0001-6259-2046; Aljahdali, Sultan/0000-0003-2615-8271; Singh, Parminder/0000-0002-0750-6309; Jamil, A. H. M. Shafayet/0000-0003-1751-4721; Antor, Morshedul Bari/0000-0001-6374-5171; khan, Dr Mohammad Monirujjaman/0000-0003-0779-8820													2040-2295	2040-2309				JUL 3	2021	2021
J	Barden-O'Fallon, J; Speizer, IS; Calhoun, LM; Moumouni, NA				Barden-O'Fallon, Janine; Speizer, Ilene S.; Calhoun, Lisa M.; Moumouni, Nouhou Abdoul			Return to pregnancy after contraceptive discontinuation to become pregnant: a pooled analysis of West and East African populations	REPRODUCTIVE HEALTH																		NOUHOU, Abdoul Moumouni/0000-0002-8798-8693														1742-4755				JUL 2	2021	18	1
J	Gobashy, MM; Metwally, AM; Abdelazeem, M; Soliman, KS; Abdelhalim, A				Gobashy, M. M.; Metwally, A. M.; Abdelazeem, M.; Soliman, K. S.; Abdelhalim, A.			Geophysical Exploration of Shallow Groundwater Aquifers in Arid Regions: A Case Study of Siwa Oasis, Egypt	NATURAL RESOURCES RESEARCH																	Abdelhalim, Ahmed/E-7796-2017; Abdelazeem, Maha/AAE-5018-2019; Gobashy, Mohamed Mostafa/J-6182-2012	Abdelhalim, Ahmed/0000-0002-1589-003X; Abdelazeem, Maha/0000-0001-8514-9290; Gobashy, Mohamed Mostafa/0000-0001-5417-926X; Soliman, Khaled/0000-0003-3352-2422													1520-7439	1573-8981				OCT	2021	30	5
J	Abuzaid, AS; AbdelRahman, MAE; Fadl, ME; Scopa, A				Abuzaid, Ahmed S.; AbdelRahman, Mohamed A. E.; Fadl, Mohamed E.; Scopa, Antonio			Land Degradation Vulnerability Mapping in a Newly-Reclaimed Desert Oasis in a Hyper-Arid Agro-Ecosystem Using AHP and Geospatial Techniques	AGRONOMY-BASEL																	scopa, antonio/S-6443-2017; Fadl, Mohamed/U-3327-2019	scopa, antonio/0000-0001-8610-3323; Fadl, Mohamed/0000-0002-3600-8237; Abuzaid, Ahmed S./0000-0002-1627-6250; AbdelRahman, Mohamed/0000-0001-8639-591X														2073-4395				JUL	2021	11	7
J	Azelhak, Y; Benaaouinate, L; Medromi, H; Errami, Y; Bouragba, T; Voyer, D				Azelhak, Younes; Benaaouinate, Loubna; Medromi, Hicham; Errami, Youssef; Bouragba, Tarik; Voyer, Damien			Exhaustive Comparison between Linear and Nonlinear Approaches for Grid-Side Control of Wind Energy Conversion Systems	ENERGIES																	AZELHAK, Younes/GVS-1802-2022	AZELHAK, Younes/0000-0003-0518-6230; Errami, Youssef/0000-0001-8254-5810														1996-1073				JUL	2021	14	13
J	Delgado-Baquerizo, M; Eldridge, DJ; Liu, YR; Sokoya, B; Wang, JT; Hu, HW; He, JZ; Bastida, F; Moreno, JL; Bamigboye, AR; Blanco-Pastor, JL; Cano-Diaz, C; Illan, JG; Makhalanyane, TP; Siebe, C; Trivedi, P; Zaady, E; Verma, JP; Wang, L; Wang, JY; Grebenc, T; Penaloza-Bojaca, GF; Nahberger, TU; Teixido, AL; Zhou, XQ; Berdugo, M; Duran, J; Rodriguez, A; Zhou, XB; Alfaro, F; Abades, S; Plaza, C; Rey, …				Delgado-Baquerizo, Manuel; Eldridge, David J.; Liu, Yu-Rong; Sokoya, Blessing; Wang, Jun-Tao; Hu, Hang-Wei; He, Ji-Zheng; Bastida, Felipe; Moreno, Jose L.; Bamigboye, Adebola R.; Blanco-Pastor, Jose L.; Cano-Diaz, Concha; Illan, Javier G.; Makhalanyane, Thulani P.; Siebe, Christina; Trivedi, Pankaj; Zaady, Eli; Verma, Jay Prakash; Wang, Ling; Wang, Jianyong; Grebenc, Tine; Penaloza-Bojaca, Gabrie…			Global homogenization of the structure and function in the soil microbiome of urban greenspaces	SCIENCE ADVANCES																	Cano-Díaz, Concha/AAD-1034-2022; TEIXIDO, ALBERTO L/A-9551-2015; PEÑALOZA BOJACÁ, GABRIEL FELIPE/GPG-1710-2022; Singh, Brajesh/R-6321-2019; Liu, Yu-Rong/J-9684-2013; Wang, Juntao/O-4423-2015; DELGADO-BAQUERIZO, MANUEL/GLS-0346-2022; Pereiras, Alexandra Rodríguez/C-2879-2015; Hu, Hang-Wei/N-1581-2017; He, Ji-Zheng/A-4488-2009; Rey SIMO, ANA/F-5791-2016; Duran, Jorge/AFN-5619-2022; Delgado-Baqueriz…	Cano-Díaz, Concha/0000-0001-6948-6553; TEIXIDO, ALBERTO L/0000-0001-8009-1237; PEÑALOZA BOJACÁ, GABRIEL FELIPE/0000-0001-7085-9521; Singh, Brajesh/0000-0003-4413-4185; Liu, Yu-Rong/0000-0003-1112-4255; Wang, Juntao/0000-0002-1822-2176; DELGADO-BAQUERIZO, MANUEL/0000-0002-6499-576X; Pereiras, Alexandra Rodríguez/0000-0001-5849-8778; Hu, Hang-Wei/0000-0002-3294-102X; He, Ji-Zheng/0000-0002-9169-805…													2375-2548					JUL	2021	7	28
J	Gao, L; Ma, JB; Liu, YH; Huang, Y; Mohamad, OAA; Jiang, HC; Egamberdieva, D; Li, WJ; Li, L				Gao, Lei; Ma, Jinbiao; Liu, Yonghong; Huang, Yin; Mohamad, Osama Abdalla Abdelshafy; Jiang, Hongchen; Egamberdieva, Dilfuza; Li, Wenjun; Li, Li			Diversity and Biocontrol Potential of Cultivable Endophytic Bacteria Associated with Halophytes from the West Aral Sea Basin	MICROORGANISMS																	Egamberdieva, Dilfuza/A-1349-2014; Abdalla Abdelshafy Mohamad, Osama/GGS-3886-2022; Jiang, Hongchen/Y-9471-2018	Egamberdieva, Dilfuza/0000-0001-9811-9277; Abdalla Abdelshafy Mohamad, Osama/0000-0002-2234-8273; Jiang, Hongchen/0000-0003-1271-7028; Liu, Yong-Hong/0000-0002-7391-7093; ma, Jinbiao/0000-0003-0426-3986														2076-2607				JUL	2021	9	7
J	Hachoun, Z; Ouerdane, A; Yahiaoui, I; Gulakhmadov, A; Chen, X				Hachoun, Zoubir; Ouerdane, Abdallah; Yahiaoui, Ibrahim; Gulakhmadov, Aminjon; Chen, Xi			RETRACTED: Investigating the sensing properties of SnO2 nanoparticles doped with gold (Retracted article. See vol. 128, 2022)	APPLIED PHYSICS A-MATERIALS SCIENCE & PROCESSING																		Gulakhmadov, Aminjon/0000-0002-7289-8310													0947-8396	1432-0630				JUL	2021	127	7
J	Hernandez-Damian, AL; Gomez-Acevedo, SL; Cevallos-Ferriz, SRS				Lilia Hernandez-Damian, Ana; Luz Gomez-Acevedo, Sandra; Silvestre Cevallos-Ferriz, Sergio Rafael			FOSSIL RECORD OF CELASTRACEAE: EVALUATION AND POTENTIAL USE IN MOLECULAR CALIBRATIONS	BOTANICAL SCIENCES																		Cevallos-Ferriz, Sergio Rafael Silvestre/0000-0002-8205-8526													2007-4298	2007-4476				JUL-SEP	2021	99	3
J	Mantravadi, KC; Gedela, DR				Mantravadi, K. C.; Gedela, D. R.			MACS vs TESA for raised sperm DNA fragmentation index - a RCT	HUMAN REPRODUCTION																															0268-1161	1460-2350				JUL	2021	36
J	Qi, YL; Evans, PN; Li, YX; Rao, YZ; Qu, YN; Tan, S; Jiao, JY; Chen, YT; Hedlund, BP; Shu, WS; Hua, ZS; Li, WJ				Qi, Yan-Ling; Evans, Paul N.; Li, Yu-Xian; Rao, Yang-Zhi; Qu, Yan-Ni; Tan, Sha; Jiao, Jian-Yu; Chen, Ya-Ting; Hedlund, Brian P.; Shu, Wen-Sheng; Hua, Zheng-Shuang; Li, Wen-Jun			Comparative Genomics Reveals Thermal Adaptation and a High Metabolic Diversity in Candidatus Bathyarchaeia	MSYSTEMS																	Hua, Zhengshuang/GRF-4469-2022; Hedlund, Brian/HJY-8944-2023	Hua, Zhengshuang/0000-0002-2405-4228; Hedlund, Brian/0000-0001-8530-0448													2379-5077					JUL-AUG	2021	6	4
J	Saeed, M; Ibanez-Costa, A; Patino-Trives, AM; Munoz-Barrera, L; Estevez, EC; Aguirre, MA; Lopez-Pedrera, C				Saeed, Mohammad; Ibanez-Costa, Alejandro; Patino-Trives, Alejandra Maria; Munoz-Barrera, Laura; Estevez, Eduardo Collantes; Aguirre, Maria Angeles; Lopez-Pedrera, Chary			Expression of DDX11 and DNM1L at the 12p11 Locus Modulates Systemic Lupus Erythematosus Susceptibility	INTERNATIONAL JOURNAL OF MOLECULAR SCIENCES																	Ibáñez-Costa, Alejandro/L-5323-2013; LOPEZ-PEDRERA, CHARY/M-4603-2015	Ibáñez-Costa, Alejandro/0000-0003-4649-0095; Saeed, Mohammad/0000-0002-5276-5940; LOPEZ-PEDRERA, CHARY/0000-0003-2067-4603; Aguirre, MA/0000-0002-5653-4293; Collantes Estevez, Eduardo/0000-0002-7647-6289														1422-0067				JUL	2021	22	14
J	Wufu, A; Chen, Y; Yang, ST; Lou, HZ; Wang, PF; Li, CJ; Wang, J; Ma, LG				Wufu, Adilai; Chen, Yun; Yang, Shengtian; Lou, Hezhen; Wang, Pengfei; Li, Chaojun; Wang, Juan; Ma, Ligang			Changes in Glacial Meltwater Runoff and Its Response to Climate Change in the Tianshan Region Detected Using Unmanned Aerial Vehicles (UAVs) and Satellite Remote Sensing	WATER																	Chen, Yun/C-8672-2011	Chen, Yun/0000-0001-6819-6562														2073-4441				JUL	2021	13	13
J	Ahmed, F; Tscharke, B; O'Brien, JW; Thompson, J; Zheng, QD; Mueller, JF; Thomas, KV				Ahmed, Fahad; Tscharke, Benjamin; O'Brien, Jake W.; Thompson, Jack; Zheng, Qiuda; Mueller, Jochen F.; Thomas, Kevin, V			Quantification of selected analgesics and their metabolites in influent wastewater by liquid chromatography tandem mass spectrometry	TALANTA																	Tscharke, Ben John/O-7188-2017; O'Brien, Jake William/C-4749-2015; Thompson, Jack/HDO-2763-2022; Thomas, Kevin/AAO-2170-2020	Tscharke, Ben John/0000-0002-3292-3534; O'Brien, Jake William/0000-0001-9336-9656; Thomas, Kevin/0000-0002-2155-100X; Zheng, Qiuda/0000-0002-6456-0926; Ahmed, Fahad/0000-0002-7874-5163													0039-9140	1873-3573				NOV 1	2021	234
J	Paolinelli, M; Escoriaza, G; Cesari, C; Garcia-Lampasona, S; Hernandez-Martinez, R				Paolinelli, Marcos; Escoriaza, Georgina; Cesari, Cecilia; Garcia-Lampasona, Sandra; Hernandez-Martinez, Rufina			Characterization of Grapevine Wood Microbiome Through a Metatranscriptomic Approach	MICROBIAL ECOLOGY																	Paolinelli, Marcos/Q-6593-2019	Paolinelli, Marcos/0000-0003-0098-0646													0095-3628	1432-184X				APR	2022	83	3
J	Tewksbury, BJ; Tarabees, EA; Welch, RM; Mehrtens, CJ				Tewksbury, Barbara J.; Tarabees, Elhamy A.; Welch, Robert M.; Mehrtens, Charlotte J.			Inferring Hypogene Karst at Depth from the Patterns of Non-Tectonic Syncline Networks in Eocene Limestones, Western Desert, Egypt	FRONTIERS IN EARTH SCIENCE																																2296-6463				JUN 30	2021	9
J	Kamikawa, Y; Saito, A; Matsuhisa, K; Kaneko, M; Asada, R; Horikoshi, Y; Tashiro, S; Imaizumi, K				Kamikawa, Yasunao; Saito, Atsushi; Matsuhisa, Koji; Kaneko, Masayuki; Asada, Rie; Horikoshi, Yasunori; Tashiro, Satoshi; Imaizumi, Kazunori			OASIS/CREB3L1 is a factor that responds to nuclear envelope stress	CELL DEATH DISCOVERY																		Kitamura, Rie/0000-0001-8347-6909; Matsuhisa, Koji/0000-0003-0707-9025														2058-7716				JUN 29	2021	7	1
J	Zheng, GX; Bao, AM; Allen, SM; Ballesteros-Canovas, JA; Yuan, Y; Jiapaer, G; Stoffel, M				Zheng, Guoxiong; Bao, Anming; Allen, Simon; Ballesteros-Canovas, Juan Antonio; Yuan, Ye; Jiapaer, Guli; Stoffel, Markus			Numerous unreported glacial lake outburst floods in the Third Pole revealed by high-resolution satellite data and geomorphological evidence	SCIENCE BULLETIN																	Zheng, Guoxiong/AAX-3597-2021	Zheng, Guoxiong/0000-0002-9126-8357; Allen, Simon/0000-0002-4809-649X; Ballesteros Canovas, Juan A./0000-0003-4439-397X; Bao, Anming/0000-0002-6221-7403													2095-9273	2095-9281				JUL 15	2021	66	13
J	Bisse, SB; Ekoko, BE; Gerber, J; Ekomane, E; Franchi, F				Bisse, Salomon Bertrant; Ekoko, Bokanda Eric; Gerber, Jacques; Ekomane, Emile; Franchi, Fulvio			Influence of biotic vs abiotic processes on the genesis of non-marine carbonates along the Cameroon Volcanic Line (Cameroon) and palaeofluid provenance	DEPOSITIONAL RECORD																																2055-4877				FEB	2022	8	1
J	Huang, XZ; Xiang, LX; Lei, GL; Sun, MJ; Qiu, MH; Storozum, M; Huang, C; Munkhbayar, C; Demberel, O; Zhang, J; Zhang, JW; Chen, XM; Chen, JH; Chen, FH				Huang, Xiaozhong; Xiang, Lixiong; Lei, Guoliang; Sun, Mingjie; Qiu, Menghan; Storozum, Michael; Huang, Chong; Munkhbayar, Chuluunbat; Demberel, Otgonbayar; Zhang, Jun; Zhang, Jiawu; Chen, Xuemei; Chen, Jianhui; Chen, Fahu			Sedimentary Pediastrum record of middle-late Holocene temperature change and its impacts on early human culture in the desert-oasis area of northwestern China	QUATERNARY SCIENCE REVIEWS																	Fahu, Chen/B-2788-2011; Chen, Jianhui/A-5340-2011; Zhang, Jiawu/C-8633-2011; Qiu, Menghan/GQQ-5459-2022; Demberel, Otgonbayar/ABD-4748-2021; Demberel, Otgonbayar/ABD-3196-2021	Chen, Jianhui/0000-0002-6768-1619; Zhang, Jiawu/0000-0002-4153-1081; Demberel, Otgonbayar/0000-0001-9748-3392; Huang, Xiaozhong/0000-0002-2127-0451; Xiang, Lixiong/0000-0002-7064-4384; /0000-0002-4471-8511													0277-3791	1873-457X				AUG 1	2021	265
J	Dubey, AK; Lal, P; Kumar, P; Kumar, A; Dvornikov, YA				Dubey, Aditya Kumar; Lal, Preet; Kumar, Pankaj; Kumar, Amit; Dvornikov, Y. Anton			Present and future projections of heatwave hazard-risk over India: A regional earth system model assessment	ENVIRONMENTAL RESEARCH																	Lal, Preet/R-7900-2018; Kumar, Amit/H-5240-2012; Dubey, Aditya Kumar/AAM-3756-2021	Lal, Preet/0000-0002-7119-4768; Dubey, Aditya Kumar/0000-0003-0579-9109; Kumar, Amit/0000-0002-4582-5677; Dvornikov, Anton/0000-0002-9334-3138													0013-9351	1096-0953				OCT	2021	201
J	Suresha, HS; Parthasarathy, SS				Suresha, Halebeedu Subbaraya; Parthasarathy, Srirangapatna Sampathkumaran			Detection of Alzheimer's disease using grey wolf optimization based clustering algorithm and deep neural network from magnetic resonance images	DISTRIBUTED AND PARALLEL DATABASES																															0926-8782	1573-7578				DEC	2022	40	4
J	Thirumagal, J; Mahadevappa, M; Sadhu, A; Dutta, PK				Thirumagal, Jayaraman; Mahadevappa, Manjunatha; Sadhu, Anup; Dutta, Pranab Kumar			Ventricle shape analysis using modified WKS for atrophy detection	MEDICAL & BIOLOGICAL ENGINEERING & COMPUTING																	Mahadevappa, Manjunatha/AAJ-4263-2020	Mahadevappa, Manjunatha/0000-0003-4700-9080													0140-0118	1741-0444				AUG	2021	59	7-8
J	Wang, WC; Pang, JY; Zhang, FH; Sun, LP; Yang, L; Zhao, YG; Yang, Y; Wang, YJ; Siddique, KHM				Wang, Weichao; Pang, Jiayin; Zhang, Fenghua; Sun, Lupeng; Yang, Lei; Zhao, Yaguang; Yang, Yang; Wang, Yajuan; Siddique, Kadambot H. M.			Integrated transcriptomics and metabolomics analysis to characterize alkali stress responses in canola (Brassica napus L.)	PLANT PHYSIOLOGY AND BIOCHEMISTRY																	Siddique, Kadambot H.M./B-3462-2011; Wang, Weichao/AAE-5178-2022; Pang, Jiayin/AAZ-8144-2021	Siddique, Kadambot H.M./0000-0001-6097-4235; Wang, Weichao/0000-0003-2761-6561; Pang, Jiayin/0000-0002-8127-645X; Zhang, Fenghua/0000-0002-1666-9548													0981-9428	1873-2690				SEP	2021	166
J	Wang, Z; Zhang, F; Zhang, XL; Chan, NW; Kung, HT; Ariken, M; Zhou, XH; Wang, YS				Wang, Zheng; Zhang, Fei; Zhang, Xianlong; Chan, Ngai Weng; Kung, Hsiang-te; Ariken, Muhadaisi; Zhou, Xiaohong; Wang, Yishan			Regional suitability prediction of soil salinization based on remote-sensing derivatives and optimal spectral index	SCIENCE OF THE TOTAL ENVIRONMENT																	Wang, Yu/GZL-9655-2022; Wang, Yixuan/GZK-6559-2022; Zhang, Fei/AAD-6047-2019; wang, yi/GVT-8516-2022; wang, yixuan/GXW-2866-2022; Wang, Yijun/GXW-1763-2022; Wang, Yin/HCI-9352-2022	Zhang, Fei/0000-0002-1194-8513;													0048-9697	1879-1026				JUN 25	2021	775
J	Cao, QQ; Li, JR; Wang, G; Wang, D; Xin, ZM; Xiao, HJ; Zhang, KB				Cao, Qiqi; Li, Junran; Wang, Guan; Wang, Dong; Xin, Zhiming; Xiao, Huijie; Zhang, Kebin			On the spatial variability and influencing factors of soil organic carbon and total nitrogen stocks in a desert oasis ecotone of northwestern China	CATENA																		Wang, Guan/0000-0001-8202-9939													0341-8162	1872-6887				NOV	2021	206
J	Liu, C; Yan, XY; Jiang, FQ				Liu, Chao; Yan, Xiaoyue; Jiang, Fengqing			Desert vegetation responses to the temporal distribution patterns of precipitation across the northern Xinjiang, China	CATENA																															0341-8162	1872-6887				NOV	2021	206
J	Meng, XY; Gao, X; Li, S; Li, SY; Lei, JQ				Meng, Xiaoyu; Gao, Xin; Li, Sen; Li, Shengyu; Lei, Jiaqiang			Monitoring desertification in Mongolia based on Landsat images and Google Earth Engine from 1990 to 2020	ECOLOGICAL INDICATORS																		Meng, Xiaoyu/0000-0001-9372-0899													1470-160X	1872-7034				OCT	2021	129
J	Wang, YJ; Gu, XC; Yang, G; Yao, JQ; Liao, N				Wang, Yuejian; Gu, Xinchen; Yang, Guang; Yao, Junqiang; Liao, Na			Impacts of climate change and human activities on water resources in the Ebinur Lake Basin, Northwest China	JOURNAL OF ARID LAND																	GU, xinchen/ABC-7056-2020; Yao, Junqiang/O-7681-2019	GU, xinchen/0000-0002-0563-2395; Yao, Junqiang/0000-0002-2700-0700													1674-6767	2194-7783				JUN	2021	13	6
J	Jiang, L; She, CW; Tian, CY; Tanveer, M; Wang, L				Jiang, Li; She, Chaowen; Tian, Changyan; Tanveer, Mohsin; Wang, Lei			Storage Period and Different Abiotic Factors Regulate Seed Germination of Two Apocynum Species - Cash Crops in Arid Saline Regions in the Northwestern China	FRONTIERS IN PLANT SCIENCE																	Tanveer, Mohsin/I-2577-2019	Tanveer, Mohsin/0000-0003-4560-6439													1664-462X					JUN 17	2021	12
J	Bhadriraju, B; Sang-Il Kwon, J; Khan, F				Bhadriraju, Bhavana; Sang-Il Kwon, Joseph; Khan, Faisal			Risk-based fault prediction of chemical processes using operable adaptive sparse identification of systems (OASIS)	COMPUTERS & CHEMICAL ENGINEERING																															0098-1354	1873-4375				SEP	2021	152
J	Hasan, R; Khizar, Y; Mahmood, S; Sheikh, MK				Hasan, Raza; Khizar, Yasir; Mahmood, Salman; Sheikh, Muhammad Kashif			Design Space Exploration for High-Speed Implementation of the MISTY1 Block Cipher	MATHEMATICAL PROBLEMS IN ENGINEERING																	Mahmood, Salman/AFK-5214-2022; Mahmood, Salman/AAG-3791-2022; Hasan, Raza/N-5999-2019	Mahmood, Salman/0000-0003-2860-4095; Mahmood, Salman/0000-0003-2860-4095; Hasan, Raza/0000-0002-8089-837X; Shaikh, Muhammad Kashif/0000-0003-3309-1298													1024-123X	1563-5147				JUN 16	2021	2021
J	Imin, B; Dai, Y; Shi, QD; Guo, YCA; Li, H; Nijat, M				Imin, Bilal; Dai, Yue; Shi, Qingdong; Guo, Yuchuan; Li, Hao; Nijat, Marhaba			Responses of two dominant desert plant species to the changes in groundwater depth in hinterland natural oasis, Tarim Basin	ECOLOGY AND EVOLUTION																															2045-7758					JUL	2021	11	14
J	Wang, XX; Chen, YN; Li, Z; Fang, GH; Wang, F; Hao, HC				Wang, Xuanxuan; Chen, Yaning; Li, Zhi; Fang, Gonghuan; Wang, Fei; Hao, Haichao			Water resources management and dynamic changes in water politics in the transboundary river basins of Central Asia	HYDROLOGY AND EARTH SYSTEM SCIENCES																		chen, ya ning/0000-0001-6742-1641													1027-5606	1607-7938				JUN 16	2021	25	6
J	Shevnina, E; Kourzeneva, E; Dvornikov, Y; Fedorova, I				Shevnina, Elena; Kourzeneva, Ekaterina; Dvornikov, Yury; Fedorova, Irina			Retention time of lakes in the Larsemann Hills oasis, East Antarctica	CRYOSPHERE																	Dvornikov, Yury/J-5087-2016; Fedorova, Irina V./N-3436-2013	Dvornikov, Yury/0000-0003-3491-4487; Fedorova, Irina V./0000-0001-5370-427X; Shevnina, Elena/0000-0003-0739-9977													1994-0416	1994-0424				JUN 14	2021	15	6
J	Akhigbe, RE; Hamed, MA; Aremu, AO				Akhigbe, R. E.; Hamed, M. A.; Aremu, A. O.			HAART exacerbates testicular damage and impaired spermatogenesis in anti-Koch-treated rats via dysregulation of lactate transport and glutathione content	REPRODUCTIVE TOXICOLOGY																	Hamed, Moses/CAH-6613-2022	Hamed, Moses/0000-0003-3378-6794; Akhigbe, Roland/0000-0002-3874-5927													0890-6238	1873-1708				AUG	2021	103
J	Xiong, XP; Sun, SC; Zhu, QH; Zhang, XY; Liu, F; Li, YJ; Xue, F; Sun, J				Xiong, Xian-Peng; Sun, Shi-Chao; Zhu, Qian-Hao; Zhang, Xin-Yu; Liu, Feng; Li, Yan-Jun; Xue, Fei; Sun, Jie			Transcriptome Analysis and RNA Interference Reveal GhGDH2 Regulating Cotton Resistance to Verticillium Wilt by JA and SA Signaling Pathways	FRONTIERS IN PLANT SCIENCE																	Zhu, Qian-Hao/A-1298-2010	Zhu, Qian-Hao/0000-0002-6505-7417; fei, Xue/0000-0001-6311-1961													1664-462X					JUN 11	2021	12
J	Azmat, M; Ilyas, F; Sarwar, A; Huggel, C; Vaghe, SA; Hui, T; Qamar, MU; Bilal, M; Ahmed, Z				Azmat, Muhammad; Ilyas, Fatima; Sarwar, Afia; Huggel, Christain; Vaghe, Saeid Ashraf; Hui, Tao; Qamar, Muhammad Uzair; Bilal, Muhammad; Ahmed, Zeeshan			Impacts of climate change on wheat phenology and yield in Indus Basin, Pakistan	SCIENCE OF THE TOTAL ENVIRONMENT																	Qamar, Muhammad/GPW-8701-2022														0048-9697	1879-1026				OCT 10	2021	790
J	Li, S; Dong, L; Lian, WH; Lin, ZL; Lu, CY; Xu, L; Li, L; Hozzein, WN; Li, WJ				Li, Shuai; Dong, Lei; Lian, Wen-Hui; Lin, Zhi-Liang; Lu, Chun-Yan; Xu, Lu; Li, Li; Hozzein, Wael N.; Li, Wen-Jun			Exploring untapped potential of Streptomyces spp. in Gurbantunggut Desert by use of highly selective culture strategy	SCIENCE OF THE TOTAL ENVIRONMENT																															0048-9697	1879-1026				OCT 10	2021	790
J	Faghim, J; Ben Mohamed, M; Bagues, M; Guasmi, F; Triki, T; Nagaz, K				Faghim, Jihed; Ben Mohamed, Mbarka; Bagues, Mohamed; Guasmi, Ferdaous; Triki, Tebra; Nagaz, Kamel			Irrigation effects on phenolic profile and extra virgin olive oil quality of Chemlalivariety grown in South Tunisia	SOUTH AFRICAN JOURNAL OF BOTANY																															0254-6299	1727-9321				SEP	2021	141
J	Luo, M; Meng, FH; Sa, CL; Duan, YC; Bao, YH; Liu, T; De Maeyer, P				Luo, Min; Meng, Fanhao; Sa, Chula; Duan, Yongchao; Bao, Yuhai; Liu, Tie; De Maeyer, Philippe			Response of vegetation phenology to soil moisture dynamics in the Mongolian Plateau	CATENA																															0341-8162	1872-6887				NOV	2021	206
J	An, FJ; Su, YZ; Niu, ZR; Liu, TN; Wang, XF				An, Fangjiao; Su, Yongzhong; Niu, Ziru; Liu, Tingna; Wang, Xuefeng			Soil nematode community composition, diversity, and soil properties in an age sequence of Haloxylon ammodendron plantations in an oasis-desert ecotone of northwestern China	ARID LAND RESEARCH AND MANAGEMENT																															1532-4982	1532-4990				OCT 2	2021	35	4
J	Liu, WG; Su, YZ; Liu, J; Zhang, K; Wang, XY; Chen, YG; Duan, LC; Shi, F				Liu, Weiguo; Su, Youzhi; Liu, Jun; Zhang, Kun; Wang, XiYuan; Chen, Yinguang; Duan, Luchun; Shi, Feng			Determination of cyflufenamid residues in 12 foodstuffs by QuEChERS-HPLC-MS/MS	FOOD CHEMISTRY																		zhang, Kun/0000-0003-2431-4592													0308-8146	1873-7072				NOV 15	2021	362
J	Noronha-D'Mello, CA; Nair, A; Mahesh, BS; Warrier, AK; Mohan, R; Kurian, S				Noronha-D'Mello, Cheryl A.; Nair, A.; Mahesh, B. S.; Warrier, A. K.; Mohan, Rahul; Kurian, Siby			Glacial-Holocene climate-driven shifts in lacustrine and terrestrial environments: Rock magnetic and geochemical evidence from East Antarctic Mochou Lake	PALAEOGEOGRAPHY PALAEOCLIMATOLOGY PALAEOECOLOGY																	Warrier, Anish Kumar/AAW-8890-2020	Warrier, Anish Kumar/0000-0003-0044-6224													0031-0182	1872-616X				AUG 15	2021	576
J	de Leeuw, JW; Daly, JO				de Leeuw, Jan Willem; Daly, J. Oliver			Forceps and vacuum: one goal, two entities	INTERNATIONAL UROGYNECOLOGY JOURNAL																															0937-3462	1433-3023				SEP	2021	32	9
J	Solmi, M; Radua, J; Olivola, M; Croce, E; Soardo, L; de Pablo, GS; Shin, JI; Kirkbride, JB; Jones, P; Kim, JH; Kim, JY; Carvalho, AF; Seeman, MV; Correll, CU; Fusar-Poli, P				Solmi, Marco; Radua, Joaquim; Olivola, Miriam; Croce, Enrico; Soardo, Livia; Salazar de Pablo, Gonzalo; Shin, Jae Il; Kirkbride, James B.; Jones, Peter; Kim, Jae Han; Kim, Jong Yeob; Carvalho, Andre F.; Seeman, Mary V.; Correll, Christoph U.; Fusar-Poli, Paolo			Age at onset of mental disorders worldwide: large-scale meta-analysis of 192 epidemiological studies	MOLECULAR PSYCHIATRY																	Kirkbride, James B./A-9345-2008; Correll, Christoph U/AAY-3179-2021; SHIN, JAE IL/ABD-9660-2021; Solmi, Marco/K-3906-2018; SHIN, JAE IL/J-6922-2017; Olivola, Miriam/AAH-9667-2021; Radua, Joaquim/H-6424-2019; Correll, Christoph/D-3530-2011; Fusar-Poli, Paolo/D-8605-2011	Kirkbride, James B./0000-0003-3401-0824; SHIN, JAE IL/0000-0003-2326-1820; Solmi, Marco/0000-0003-4877-7233; SHIN, JAE IL/0000-0003-2326-1820; Radua, Joaquim/0000-0003-1240-5438; Correll, Christoph/0000-0002-7254-5646; Olivola, Miriam/0000-0003-0914-0539; Kim, Jong Yeob/0000-0003-4756-9440; SOARDO, LIVIA/0000-0002-6735-0561; Fusar-Poli, Paolo/0000-0003-3582-6788; Jones, Peter Brian/0000-0002-0387…													1359-4184	1476-5578				JAN	2022	27	1
J	Yokoyama, G; Yasutake, D; Minami, K; Kimura, K; Marui, A; Yueru, W; Feng, JJ; Wang, WZ; Mori, M; Kitano, M				Yokoyama, Gaku; Yasutake, Daisuke; Minami, Keisuke; Kimura, Kensuke; Marui, Atsushi; Yueru, Wu; Feng, Jiaojiao; Wang, Weizhen; Mori, Makito; Kitano, Masaharu			Evaluation of the physiological significance of leaf wetting by dew as a supplemental water resource in semi-arid crop production	AGRICULTURAL WATER MANAGEMENT																		Yokoyama, Gaku/0000-0002-7636-4471; Kimura, Kensuke/0000-0002-6864-1563													0378-3774	1873-2283				SEP 1	2021	255
J	Abdallah, M; Khaiyat, A; Basaheeh, A; Kotsovos, K; Ballard, I; AlSaggaf, A; Gereige, I; Theron, R				Abdallah, Marwan; Khaiyat, Ahmad; Basaheeh, Ali; Kotsovos, Konstantinos; Ballard, Ian; AlSaggaf, Ahmed; Gereige, Issam; Theron, Ricardo			Soiling Loss Rate Measurements of Photovoltaic Modules in a Hot and Humid Desert Environment	JOURNAL OF SOLAR ENERGY ENGINEERING-TRANSACTIONS OF THE ASME																		Gereige, Issam/0000-0001-8563-4333													0199-6231	1528-8986				JUN 1	2021	143	3
J	Aili, A; Abuduwaili, J; Xu, HL; Zhao, XF; Liu, XH				Aili, Aishajiang; Abuduwaili, Jilili; Xu, Hailiang; Zhao, Xinfeng; Liu, Xinghong			A Cluster Analysis of Forward Trajectory to Identify the Transport Pathway of Salt-Dust Particles from Dried Bottom of Aral Sea, Central Asia	ATMOSPHERE																		ji, li li/0000-0001-8483-1554														2073-4433				JUN	2021	12	6
J	Al-Kahtani, SN; Taha, EA; Farag, SA; Taha, RA; Abdou, EA; Mahfouz, HM				Al-Kahtani, Saad N.; Taha, El-Kazafy A.; Farag, Soha A.; Taha, Reda A.; Abdou, Ekram A.; Mahfouz, Hatem M.			Harvest Season Significantly Influences the Fatty Acid Composition of Bee Pollen	BIOLOGY-BASEL																	Taha, El-Kazafy/P-6346-2016	Taha, El-Kazafy/0000-0003-2010-4838; AL-KAHTANI, SAAD/0000-0003-3259-0415; Farag, Soha/0000-0002-9118-1470														2079-7737				JUN	2021	10	6
J	Benabderrahim, MA; Elfalleh, W				Benabderrahim, Mohamed Ali; Elfalleh, Walid			Forage Potential of Non-Native Guinea Grass in North African Agroecosystems: Genetic, Agronomic, and Adaptive Traits	AGRONOMY-BASEL																	ELFALLEH, Walid/K-2368-2012	ELFALLEH, Walid/0000-0002-3493-6451; Benabderrahim, Mohamed Ali/0000-0002-0867-0995														2073-4395				JUN	2021	11	6
J	Dai, XA; Liu, C; Li, NW; Wang, ML; Yang, YW; Yang, XP; Zhang, SQ; He, XW; Yang, ZL; Lu, H; Li, JZ; Wang, ZK				Dai Xiao-ai; Liu Chao; Li Nai-wen; Wang Mei-lian; Yang Yu-wei; Yang Xing-ping; Zhang Shi-qi; He Xu-wei; Yang Zheng-li; Lu Heng; Li Jing-zhong; Wang Ze-kun			LAI scale effect research based on compact airborne spectrographic imager data in the Heihe Oasis	JOURNAL OF MOUNTAIN SCIENCE																	Lu, Heng/ABE-6455-2021	yang, xingping/0000-0003-3265-2903; wang, meilian/0000-0003-3854-9755; , Xiaoai/0000-0003-1342-6417													1672-6316	1993-0321				JUN	2021	18	6
J	Elgadi, S; Ouhammou, A; Taous, F; Zine, H; Papazoglou, EG; Elghali, T; Amenzou, N; El Allali, H; Aitlhaj, A; El Antari, A				Elgadi, Sara; Ouhammou, Ahmed; Taous, Fouad; Zine, Hamza; Papazoglou, Eleni G.; Elghali, Tibari; Amenzou, Noureddine; El Allali, Hassan; Aitlhaj, Abderrahmane; El Antari, Abderraouf			Combination of Stable Isotopes and Fatty Acid Composition for Geographical Origin Discrimination of One Argan Oil Vintage	FOODS																	ELGADI, Sara/AAS-1951-2021; zine, hamza/AAS-4725-2021	ELGADI, Sara/0000-0003-3868-0278; zine, hamza/0000-0001-8328-1810; Nour Edine, AMENZOU/0000-0002-6601-0151														2304-8158				JUN	2021	10	6
J	Fusar-Poli, P; Correll, CU; Arango, C; Berk, M; Patel, V; Ioannidis, JPA				Fusar-Poli, Paolol; Correll, Christoph U.; Arango, Celso; Berk, Michael; Patel, Vikram; Ioannidis, John P. A.			Preventive psychiatry: a blueprint for improving the mental health of young people	WORLD PSYCHIATRY																	Arango, Celso/AAZ-8314-2021; Correll, Christoph/D-3530-2011; Correll, Christoph U/AAY-3179-2021	Arango, Celso/0000-0003-3382-4754; Correll, Christoph/0000-0002-7254-5646;													1723-8617	2051-5545				JUN	2021	20	2
J	Gaur, H; Dakssa, L; Dawood, M; Samaiya, NK				Gaur, Himanshu; Dakssa, Lema; Dawood, Mahmoud; Samaiya, Nitin Kumar			A novel stress-based formulation of finite element analysis	JOURNAL OF ZHEJIANG UNIVERSITY-SCIENCE A																	Samaiya, Nitin Kumar/ADM-6742-2022; Gaur, Himanshu/B-9969-2016	Samaiya, Nitin Kumar/0000-0001-8294-6462; Gaur, Himanshu/0000-0001-9299-8506													1673-565X	1862-1775				JUN	2021	22	6
J	Hao, XM; Hao, HC; Zhang, JJ				Hao, Xingming; Hao, Haichao; Zhang, Jingjing			Soil moisture influenced the variability of air temperature and oasis effect in a large inland basin of an arid region	HYDROLOGICAL PROCESSES																	hao, xing ming/P-6540-2018	hao, xing ming/0000-0002-0431-1354													0885-6087	1099-1085				JUN	2021	35	6
J	Liu, XJ; Zhang, YH; Zhou, T; Li, XS; Wen, XJ; Zhang, DY				Liu, Xiaojie; Zhang, Yiheng; Zhou, Tong; Li, Xiaoshuang; Wen, Xuejing; Zhang, Daoyuan			Full-Length Transcriptome-Wide Characteristic and Functional Identification of WRKY Family in Malus sieversii during the Valsa Canker Disease Response	FORESTS																		ZHOU, Tong/0000-0002-4341-2166														1999-4907				JUN	2021	12	6
J	Peano, C; Caron, S; Mahfoudhi, M; Zammel, K; Zaidi, H; Sottile, F				Peano, Cristiana; Caron, Stefania; Mahfoudhi, Mohamed; Zammel, Khouloud; Zaidi, Houda; Sottile, Francesco			A Participatory Agrobiodiversity Conservation Approach in the Oases: Community Actions for the Promotion of Sustainable Development in Fragile Areas	DIVERSITY-BASEL																		Sottile, Francesco/0000-0002-7774-6172; peano, cristiana/0000-0001-8860-0139														1424-2818				JUN	2021	13	6
J	Prasanna, VL; Gozlan, I; Kaplan, A; Zachor-Movshovitz, D; Avisar, D				Prasanna, V. Lakshmi; Gozlan, Igal; Kaplan, Aviv; Zachor-Movshovitz, Daniel; Avisar, Dror			Solid phase extraction based on trimethylsilyloxy silica aerogel	RSC ADVANCES																		Avisar, Dror/0000-0001-9199-1548														2046-2069				JUN 1	2021	11	30
J	Saber, AA; Gontcharov, AA; Nikulin, AY; Nikulin, VY; Rayan, WA; Cantonati, M				Saber, Abdullah A.; Gontcharov, Andrey A.; Nikulin, Arthur Yu; Nikulin, Vyacheslav Yu; Rayan, Walaa A.; Cantonati, Marco			Integrative Taxonomic, Ecological and Genotyping Study of Charophyte Populations from the Egyptian Western-Desert Oases and Sinai Peninsula	PLANTS-BASEL																	Nikulin, Vyacheslav/AAO-3365-2020; Gontcharov, Andrey/GLR-4125-2022; Nikulin, Arthur/AAO-7426-2020; Cantonati, Marco/G-4278-2018	Nikulin, Vyacheslav/0000-0002-6643-4325; Gontcharov, Andrey/0000-0003-2918-730X; Nikulin, Arthur/0000-0001-6113-2136; Cantonati, Marco/0000-0003-0179-3842; Saber, Abdullah/0000-0002-4676-6998														2223-7747				JUN	2021	10	6
J	Tong, YP; Xu, F; Blank, D; Yang, WK				Tong, Yuping; Xu, Feng; Blank, David; Yang, Weikang			Water, Food Availability, and Anthropogenic Influence Determine the Nesting-Site Selection of a Desert-Dwelling Bird, Xinjiang Ground-Jay (Podoces biddulphi)	SUSTAINABILITY																	Xu, Feng/A-8626-2011	Xu, Feng/0000-0001-8925-977X														2071-1050				JUN	2021	13	11
J	Wang, M; Chen, X; Sidike, A; Cao, LZ; DeMaeyer, P; Kurban, A				Wang, Min; Chen, Xi; Sidike, Ayetiguli; Cao, Liangzhong; DeMaeyer, Philippe; Kurban, Alishir			Optimal Allocation of Surface Water Resources at the Provincial Level in the Uzbekistan Region of the Amudarya River Basin	WATER																	Kurban, Alishir/AGK-9193-2022; De Maeyer, Philippe/F-2985-2011	Kurban, Alishir/0000-0001-9387-8127; De Maeyer, Philippe/0000-0001-8902-3855; Cao, Liangzhong/0000-0002-1686-6998														2073-4441				JUN	2021	13	11
J	Bada, M; Boubiche, DE; Lagraa, N; Kerrache, CA; Imran, M; Shoaib, M				Bada, Mousaab; Boubiche, Djallel Eddine; Lagraa, Nasreddine; Kerrache, Chaker Abdelaziz; Imran, Muhammad; Shoaib, Muhammad			A policy-based solution for the detection of colluding GPS-Spoofing attacks in FANETs	TRANSPORTATION RESEARCH PART A-POLICY AND PRACTICE																	Kerrache, Chaker Abdelaziz/I-7062-2019; Imran, Muhammad/Q-2375-2017	Kerrache, Chaker Abdelaziz/0000-0001-9990-519X; Imran, Muhammad/0000-0002-6946-2591													0965-8564	1879-2375				JUL	2021	149
J	Haran, R; Kiat, Y; Izhaki, I				Haran, Ron; Kiat, Yosef; Izhaki, Ido			Patterns of partial migration of the Dead Sea Sparrow (Passer moabiticus) along the Great Rift Valley in Israel	JOURNAL OF ARID ENVIRONMENTS																	Izhaki, Ido/D-5586-2011	Izhaki, Ido/0000-0002-4525-4683; Kiat, Yosef/0000-0002-3485-3517													0140-1963	1095-922X				SEP	2021	192
J	Rajivgandhi, G; Vimala, RTV; Nandhakumar, R; Murugan, S; Alharbi, NS; Kadaikunnan, S; Khaled, JM; Alanzi, KF; Li, WJ				Rajivgandhi, Govindan; Vimala, R. T. V.; Nandhakumar, Raju; Murugan, Sevanan; Alharbi, Naiyf S.; Kadaikunnan, Shine; Khaled, Jamal M.; Alanzi, Khalid F.; Li, Wen-Jun			Adsorption of nickel ions from electroplating effluent by graphene oxide and reduced graphene oxide	ENVIRONMENTAL RESEARCH																	Govindan, Rajivgandhi/ABG-5120-2021; Alharbi, Naiyf S/B-9402-2019; Kadaikunnan, Shine/L-2836-2013; Khaled, Jamal Mohammed Ali/D-8188-2017; Raju, Nandhakumar/ABF-4459-2021	Govindan, Rajivgandhi/0000-0003-4907-8100; Alharbi, Naiyf S/0000-0001-5820-9649; Kadaikunnan, Shine/0000-0001-7018-5379; Khaled, Jamal Mohammed Ali/0000-0003-2442-0790; Raju, Nandhakumar/0000-0001-9801-7318													0013-9351	1096-0953				AUG	2021	199
J	Asad, M; Asdaq, SMB; Mohzari, Y; Alrashed, A; Alajami, HN; Aljohani, AO; Al Mushtawi, AA; Alajmi, AN; Alajmi, HN; Imran, M; Orfali, R				Asad, Mohammed; Asdaq, Syed Mohammed Basheeruddin; Mohzari, Yahya; Alrashed, Ahmed; Alajami, Hamdan Najib; Aljohani, Awad Othman; Mushtawi, Abdullah Ali Al; Alajmi, Assil Najib; Alajmi, Hanan Nageeb; Imran, Mohd.; Orfali, Raha			Pharmacokinetic and pharmacodynamic interaction of Rosuvastatin calcium with guggulipid extract in rats	SAUDI JOURNAL OF BIOLOGICAL SCIENCES																	Imran, Mohd/AAR-9970-2021; asdaq, Syed Mohammed Basheeruddin/AAH-8283-2019; Imran, Mohd/AAV-4144-2021	Imran, Mohd/0000-0002-6064-1040; asdaq, Syed Mohammed Basheeruddin/0000-0003-1533-9667;													1319-562X	2213-7106				JUN	2021	28	6
J	Zhang, CP; Toshmatov, ZO; Zhou, SX; Li, WJ; Zhang, C; Shao, H				Zhang, C. P.; Toshmatov, Z. O.; Zhou, S. X.; Li, W. J.; Zhang, C.; Shao, H.			CHEMICAL COMPOSITION AND PHYTOTOXIC ACTIVITY OF ESSENTIAL OIL FROM Senecio erucifolius	CHEMISTRY OF NATURAL COMPOUNDS																	Toshmatov, Zokir/AAD-4437-2022	zhang, chi/0000-0003-4866-1441													0009-3130	1573-8388				MAY	2021	57	3
J	Pestle, WJ; Hubbe, M; Torres-Rouff, C; Pimentel, G				Pestle, William J.; Hubbe, Mark; Torres-Rouff, Christina; Pimentel, Gonzalo			Temporal, spatial and gender-based dietary differences in middle period San Pedro de Atacama, Chile: A model-based approach	PLOS ONE																	Hubbe, Mark/G-3440-2012; Torres, Christina M./AAV-8190-2021	Hubbe, Mark/0000-0003-4433-3942;													1932-6203					MAY 25	2021	16	5
J	Alvarez-Cervantes, P; Cancino-Diaz, JC; Fabela-Illescas, HE; Carino-Cortes, R; Lopez-Villegas, EO; Ariza-Ortega, JA; Belefant-Miller, H; Betanzos-Cabrera, G				Alvarez-Cervantes, Pedro; Cancino-Diaz, Juan Carlos; Fabela-Illescas, Hector Enrique; Carino-Cortes, Raquel; Lopez-Villegas, Edgar Oliver; Ariza-Ortega, Jose Alberto; Belefant-Miller, Helen; Betanzos-Cabrera, Gabriel			Spray-drying microencapsulation of pomegranate juice increases its antioxidant activity after in vitro digestion	INTERNATIONAL JOURNAL OF FOOD SCIENCE AND TECHNOLOGY																	Betanzos, Gabriel/AHB-7550-2022; Cariño-Cortes, Raquel/E-5302-2018	Betanzos-Cabrera, Gabriel/0000-0003-2027-6904													0950-5423	1365-2621				OCT	2021	56	10
J	Niemeyer, HM; Cardenas, LM; Veliz, D				Niemeyer, Hermann M.; Cardenas, Lina M.; Veliz, David			The colors of pre-Hispanic textiles from cemeteries in the Quillagua and San Pedro de Atacama oases of Northern Chile	COLOR RESEARCH AND APPLICATION																		Cardenas, Lina/0000-0003-1631-5050													0361-2317	1520-6378				DEC	2021	46	6
J	Lasfar, S; Haidara, F; Mayouf, C; Abdellahi, FM; Elghorba, M; Wahid, A; Kane, CSE				Lasfar, Sara; Haidara, Fanta; Mayouf, Chiva; Abdellahi, Fatimatou Med; Elghorba, Mohamed; Wahid, Achraf; Kane, Cheikh Sid Ethmane			Study of the influence of dust deposits on photovoltaic solar panels: Case of Nouakchott	ENERGY FOR SUSTAINABLE DEVELOPMENT																		WAHID, Achraf/0000-0003-3101-0861													0973-0826	2352-4669				AUG	2021	63
J	Ming, GH; Hu, HC; Tian, FQ; Khan, MYA; Zhang, Q				Ming, Guanghui; Hu, Hongchang; Tian, Fuqiang; Khan, Mohd Yawar Ali; Zhang, Quan			Carbon budget for a plastic-film mulched and drip-irrigated cotton field in an oasis of Northwest China	AGRICULTURAL AND FOREST METEOROLOGY																	Khan, Mohd Yawar Ali/D-5963-2017; Tian, Fuqiang/M-9958-2013	Khan, Mohd Yawar Ali/0000-0001-6524-4733; Tian, Fuqiang/0000-0001-9414-7019													0168-1923	1873-2240				AUG 15	2021	306
J	Chelly, A; Nouira, I; Hadj-Alouane, AB; Frein, Y				Chelly, Amina; Nouira, Imen; Hadj-Alouane, Atidel B.; Frein, Yannick			A comparative study of progressive carbon taxation strategies: impact on firms' economic and environmental performances	INTERNATIONAL JOURNAL OF PRODUCTION RESEARCH																															0020-7543	1366-588X				JUN 3	2022	60	11
J	Ben Khalfallah, C; Delaitre, E; Ouerchefani, D; Demagistri, L; Darragi, F; Seyler, F				Ben Khalfallah, Cherine; Delaitre, Eric; Ouerchefani, Dalel; Demagistri, Laurent; Darragi, Fadila; Seyler, Frederique			Monitoring Vegetation Change in Tozeur Oases in Southern Tunisia by Using Trend Analysis of MODIS NDVI Time Series (2000-2016)	CANADIAN JOURNAL OF REMOTE SENSING																	Seyler, Frédérique/D-5518-2011; SEYLER, Frederique/GMX-1157-2022	Seyler, Frédérique/0000-0002-3609-7524; SEYLER, Frederique/0000-0002-3609-7524													0703-8992	1712-7971				JUL 4	2021	47	4
[truncated: 4,839 more rows]
[truncated: 22 more columns]
