# Supplementary material for: Mapping the global distribution and conservation status of oases—ecosystems of pivotal biocultural relevance
Source: PeerJ journal article supplement (doi:10.7717/peerj.18884), 2025-02-28
Supplement: Sup_Table_S5.xlsx [file Sup_Table_S5.xlsx]

## Sheet: Sheet1
Oasis name	Latitude	Longitude	Country
Abalessa	22.888965	4.851074	Algeria
Adgha	27.861729	-0.294771	Algeria
Adrar	27.859014	-0.302480	Algeria
Ahreme	25.454826	8.419800	Algeria
Ain Zaatout	35.153162	5.840109	Algeria
Al Amri oasis	34.704974	5.322896	Algeria
Amguid	26.348340	5.453248	Algeria
Amsel	22.630966	5.455723	Algeria
Aougrout	28.696230	0.336980	Algeria
Aoulef	26.964488	1.071565	Algeria
Arak	25.282778	3.746944	Algeria
Ayata Lake	33.494444	5.988889	Algeria
Bamendil	31.979291	5.288575	Algeria
Bechar	31.663373	-2.170670	Algeria
Beni Isguen	32.460125	3.678992	Algeria
Beni Ouarou	30.930142	-2.043019	Algeria
Beni-abbes	30.124229	-2.171951	Algeria
Bir Naam	34.757778	5.118333	Algeria
Biskra oasis	34.833333	5.750000	Algeria
Blidet Amor	32.936371	5.979963	Algeria
Bou Saada	35.216407	4.189925	Algeria
Bouda	27.963173	-0.433162	Algeria
Boukais	31.930981	-2.458501	Algeria
Bounoura	32.484159	3.711332	Algeria
Branis	34.993667	5.77534	Algeria
Charouine	29.038556	-0.257333	Algeria
Chegga	34.446942	5.888840	Algeria
Chetma	34.846762	5.803364	Algeria
Chott Ain El Beida	32.339858	5.425384	Algeria
Choucha	33.410275	5.970036	Algeria
Daldoul	34.083635	3.301198	Algeria
Djamaa	33.558409	6.002825	Algeria
Djanet	24.551545	9.478405	Algeria
Djorf el torba	31.509128	-2.772917	Algeria
Doucen	34.617838	5.097116	Algeria
El Agrous	34.717747	5.287128	Algeria
El Amri	34.684484	5.267192	Algeria
El Ateuf	32.440119	3.736134	Algeria
El Atteuf	32.474729	3.750499	Algeria
El Barka	27.179167	2.431389	Algeria
El Bordj	34.699268	5.352683	Algeria
El Ghrous	34.708430	5.326757	Algeria
El Golea	30.575367	2.891121	Algeria
El Hadjeb	34.806146	5.654864	Algeria
El Kantara	35.217562	5.702055	Algeria
El Ksar Ain Zeghlouf-Reggane	26.716144	0.164682	Algeria
El Menia	30.569519	2.891595	Algeria
El Metarfa	28.686722	-0.120917	Algeria
El M'Ghair	33.964870	5.934419	Algeria
El Oued	33.353979	6.880949	Algeria
Fendi	31.841318	-1.474273	Algeria
Fenoughil	27.600972	-0.309639	Algeria
Foughala	34.735306	5.323191	Algeria
Gahardaia	32.505537	3.644220	Algeria
Gassi-Touil	30.530742	6.477788	Algeria
Ghardaia	32.502160	3.642881	Algeria
Gourara	29.262031	0.218904	Algeria
Guelta d’Edjif Mellène	23.476944	5.781111	Algeria
Gueltas d’Issakarassene	23.422729	5.759814	Algeria
Gueltates Afilal	23.148740	5.733695	Algeria
Guemar	33.522467	6.783543	Algeria
Guerrera	32.781166	4.497288	Algeria
Hammam Salahine	34.873755	5.674156	Algeria
Hassi Ben Abdallah	32.030070	5.464962	Algeria
Hassi Messaoud	31.827407	5.885115	Algeria
Heiha	29.533536	-0.021943	Algeria
Ideles	23.819778	5.931547	Algeria
Igli	30.446697	-2.282433	Algeria
Iherir	25.402645	8.406069	Algeria
Illizi	26.480059	8.477361	Algeria
In Amguel	23.694269	5.152646	Algeria
In Salah	27.196258	2.461980	Algeria
Khangat Sidi Naji	34.817028	6.703979	Algeria
Lahmeur	27.425000	-0.250000	Algeria
Lalla	34.394480	8.832996	Algeria
Lioua	34.621319	5.399489	Algeria
M’zab Valley	32.491837	3.670324	Algeria
Mansor Bouda	28.004238	-0.431770	Algeria
M'Chouneche	34.940916	5.999221	Algeria
Megarine	33.199816	6.088580	Algeria
Mekhadma	34.645139	5.489587	Algeria
Mekkid	34.088840	3.313127	Algeria
Melika	32.491243	3.698413	Algeria
Meraguene	28.031056	-0.267361	Algeria
Messad	34.176417	3.457644	Algeria
Metarfa	28.593725	-0.153803	Algeria
Metlili	32.287031	3.608400	Algeria
Mlili	34.661943	5.550543	Algeria
Moghrar	32.491280	-0.467772	Algeria
Mraier	33.955730	5.943636	Algeria
M'zab	32.472987	3.706811	Algeria
M'ziraa	34.719328	6.282167	Algeria
Nefzaoua	33.559739	8.937037	Algeria
Nezla	33.063936	6.062704	Algeria
N'Goussa	32.135004	5.303528	Algeria
Od Aissa	29.423434	-0.087328	Algeria
Ouargla oasis	31.966667	5.333333	Algeria
Oued Djedi Wadi in Zab El-Guebli	34.632700	5.482323	Algeria
Oued El Hai	35.245453	5.699984	Algeria
Oued el Melah	34.330617	8.572920	Algeria
Oued Souf oasis	33.365293	6.854822	Algeria
Ouled Ahmed Tammi	27.859014	-0.302480	Algeria
Ouled El Hadj Mamoun	27.750580	-0.232061	Algeria
Ouled Mahmoude	28.597186	0.039593	Algeria
Ouled Rached	29.432546	0.284532	Algeria
Ouled Said	29.419008	0.242616	Algeria
Oum et tiour	34.144137	5.854677	Algeria
Oum Rneb	32.064395	5.343815	Algeria
Oumache	34.697485	5.684989	Algeria
Ourlaga	31.949090	5.300479	Algeria
Ourlal	34.654997	5.522188	Algeria
Rouissat	31.944569	5.365890	Algeria
Sali	27.035028	-0.092500	Algeria
Sanderouce	33.544379	7.005499	Algeria
Saoura	29.456133	-1.428377	Algeria
Sebaa	28.222694	-0.164806	Algeria
Sebseb	32.172526	3.577284	Algeria
Sidi Khouiled	31.976814	5.412719	Algeria
Sidi Mhamed Moussa	34.554349	6.098982	Algeria
Sidi Okba	34.756215	5.891405	Algeria
Tadjnint	32.440600	3.740492	Algeria
Taghit	30.929210	-2.041420	Algeria
Tamanrasse	22.782985	5.531405	Algeria
Tamanrasset	22.782985	5.531405	Algeria
Tamantit	27.716981	-0.276960	Algeria
Tamerna	33.441874	5.967529	Algeria
Taourit	27.859014	-0.302480	Algeria
Tebesbest	33.115116	6.099457	Algeria
Telmine	29.306750	-0.534306	Algeria
Tidikelt	26.931825	1.485675	Algeria
Tilliléne	28.019007	-0.269555	Algeria
Timimoun	29.265622	0.222565	Algeria
Timmi	27.819670	-0.293595	Algeria
Tinerkouk	29.706928	0.711165	Algeria
Tit	22.964391	5.195068	Algeria
Tolga	34.716667	5.383333	Algeria
Touat	27.328961	-0.220714	Algeria
Touggourt	33.114837	6.091385	Algeria
Tsabit	28.349650	-0.227575	Algeria
Zaouia	33.146087	6.092864	Algeria
Zaouiet Ben Ouaar	34.653020	5.528700	Algeria
Zaouiet Kounta	27.304497	-0.227690	Algeria
Zelfana	32.394470	4.211059	Algeria
Ziban	34.822261	5.776596	Algeria
Zribet El Oued	34.663335	6.513284	Algeria
Agua Amarga	-33.516100	-69.207500	Argentina
Altamira	-33.805800	-69.107700	Argentina
Anillaco	-27.921146	-67.614194	Argentina
Arroyo Telsén	-42.476444	-66.871667	Argentina
Chacras de Coria	-32.979399	-68.877619	Argentina
El Marcado	-33.083333	-68.216667	Argentina
El Peral	-33.346700	-69.157700	Argentina
Fiambalá	-27.684894	-67.622013	Argentina
Gustavo André	-32.646100	-68.313800	Argentina
Jocolí	-32.583333	-68.583333	Argentina
Junín	-33.116667	-68.483333	Argentina
La Consulta	-33.706600	-69.073300	Argentina
La Llave	-34.647700	-68.016100	Argentina
Las Catitas	-33.274388	-68.079140	Argentina
Las Paredes	-34.526600	-68.428600	Argentina
Las Violetas	-32.799333	-68.602940	Argentina
Los Campamentos	-33.250000	-68.450000	Argentina
Los Nacimientos	-27.458579	-67.600780	Argentina
Malargue	-35.460402	-69.589798	Argentina
Mendoza	-33.010556	-68.874444	Argentina
Montecaseros	-33.039100	-68.455500	Argentina
Perdriel	-33.116667	-68.900000	Argentina
Russell	-33.016667	-68.750000	Argentina
San Juan	-31.639640	-68.487228	Argentina
San Martin	-33.084289	-68.443331	Argentina
San Rafael	-34.624777	-68.188549	Argentina
Tres Esquinas	-33.869100	-69.087700	Argentina
Tres Porteñas	-32.900000	-68.383333	Argentina
Tunuyán	-33.563600	-69.020000	Argentina
Villa Atuel	-34.795200	-67.947500	Argentina
Vista Flores	-33.644400	-69.160500	Argentina
Vistalba	-33.032136	-68.914527	Argentina
Palm Valley	-24.043706	132.700285	Australia
Agouta	18.920454	20.878770	Chad
Bardaï oasis town	21.350103	16.997061	Chad
Bedrim	18.914349	20.901179	Chad
Boku	18.910420	20.908073	Chad
Djara	18.915758	20.891692	Chad
Edem	18.923969	20.842069	Chad
Faya Largeau	17.915224	19.093361	Chad
Forodone	19.004485	20.537403	Chad
Hogou	18.917929	20.884833	Chad
Mioji	19.009217	20.533286	Chad
Mousso	17.947704	19.842033	Chad
Teil	18.919427	20.866352	Chad
Uma	19.011183	20.512144	Chad
Yebbi Bou	20.931779	18.091276	Chad
Yoa	19.044753	20.494220	Chad
Alto Patache	-20.817666	-70.152291	Chile
Alto Yumbes	-24.992937	-70.438285	Chile
Azapa	-18.516380	-70.199092	Chile
Beter	-22.970119	-68.210565	Chile
Calama	-22.465907	-68.922282	Chile
Caleta Junin	-19.6167	-70.1833	Chile
Camar	-23.406153	-67.961246	Chile
Camaraca	-18.6333	-70.3000	Chile
Camarones	-19.009634	-69.862081	Chile
Canchones	-20.434960	-69.533400	Chile
Cerro Guanacos	-20.3833	-70.1000	Chile
Cerro Oyarbide Sur-Cerro Pajonal	-20.5000	-70.0500	Chile
Chaca	-18.819766	-70.143348	Chile
Chipanas	-21.2667	-70.0667	Chile
Chiu-Chiu	-22.318571	-68.649949	Chile
Conde Duque	-22.910599	-68.197257	Chile
Coyo	-22.952376	-68.234387	Chile
Cucuter	-22.972969	-68.179470	Chile
El Tofo	-29.4500	-71.2500	Chile
Flamenco	-26.5333	-70.6000	Chile
Guatacondo	-20.926943	-69.057241	Chile
Iquique	-20.2167	-70.0117	Chile
Larache	-22.926822	-68.201445	Chile
Llanos de Challe	-28.1704	-71.138453	Chile
Matilla	-20.514917	-69.36257	Chile
Morro Moreno	-23.4833	-70.5833	Chile
Pan de Azucar	-26.187138	-70.627423	Chile
Paposo	-25.0000	-70.4473	Chile
Pica	-20.488541	-69.322310	Chile
Punta Gruesa	-20.3667	-70.1333	Chile
Punta Lobos	-21.050637	-70.116423	Chile
Punta Madrid	-18.9167	-70.3000	Chile
Qda. Bandurrias	-25.215775	-70.424649	Chile
Qda. Camarones	-19.0667	-70.0833	Chile
Qda. de Azapa	-18.532225	-70.067048	Chile
Qda. El Diablo (Michilla)	-22.6992	-70.2458	Chile
Qda. El Medano	-24.798636	-70.520194	Chile
Qda. La Plata	-24.7187	-70.5611	Chile
Qda. La Rinconada	-24.940114	-70.494473	Chile
Qda. Miguel Díaz	-24.548488	-70.542788	Chile
Qda. Río Lluta	-18.3667	-70.0667	Chile
Qda. Río Loa	-21.4136	-69.9624	Chile
Qda. Vitor	-18.868121	-70.018953	Chile
Quillagua	-21.654095	-69.538513	Chile
Quillagua Norte	-21.624143	-69.554670	Chile
Quitor	-22.893453	-68.211933	Chile
Río Huasco	-28.488023	-71.227668	Chile
San Pedro di Atacama (main village)	-22.916667	-68.200000	Chile
Sequitor	-22.939816	-68.214555	Chile
Solcor	-22.921349	-68.197640	Chile
Solor	-22.947304	-68.185334	Chile
Tarapacá	-19.901450	-69.483970	Chile
Tchecar	-22.938562	-68.206550	Chile
Tiliviche	-19.553080	-69.953750	Chile
Tilomonte	-23.793277	-68.108796	Chile
Toconao	-23.189407	-68.010058	Chile
Tocopilla	-22.3000	-70.2167	Chile
Tulor	-22.975989	-68.243142	Chile
Victoria Viejo	-20.799305	-69.596314	Chile
Yaye	-22.924252	-68.215174	Chile
Zapiga	-19.645922	-69.950183	Chile
150 Regiment in Shihezi District	44.987583	86.112730	China
Aheqi	40.836675	78.006346	China
Aketao	39.157858	75.867477	China
Aksu	41.199401	80.194245	China
Alaer oasis	40.492779	81.317212	China
Alar	40.357129	80.494482	China
Altay	47.766623	88.142378	China
Alxa Left Banner	39.317235	105.717494	China
Andier	37.965588	83.632526	China
Artux	39.722066	76.201547	China
Asku	40.616667	80.750000	China
Atushi	39.662306	76.130792	China
Awati	40.465038	80.465705	China
Bachu	39.761056	78.501472	China
Badain Jaran	39.358633	100.030365	China
Balikun	43.765534	92.965658	China
Barun Yikeri	39.727821	102.322183	China
Bashu-Tumxuk	39.896608	79.151633	China
Bay	41.683504	81.726376	China
Bohu	41.944583	86.644180	China
Bole	44.922271	81.944298	China
Bortala	44.963665	82.104480	China
Bosten Lake	42.211641	87.131567	China
Buerjin	47.717192	86.855613	China
Bugur	41.828349	84.190672	China
Buheba	46.307721	90.364908	China
Buluhe	46.362781	90.297624	China
Caijiahu	44.200000	87.533333	China
Chahaertan	39.312780	105.717546	China
Changji	44.315300	86.848066	China
Chapchal	43.861466	81.158987	China
Charchan	42.958748	90.415319	China
Daliyaboy	38.381329	81.904415	China
Daliyabuyi	38.381329	81.904415	China
Daman	38.855500	100.372200	China
Dengkou Oasis	40.536448	106.655287	China
Dina	41.370293	85.903880	China
Dingxin oasis	40.303227	99.510010	China
Dongkan	42.801483	89.298635	China
Dulan	36.358880	98.068505	China
Dunhuang	40.142833	94.634076	China
Ebinur Lake Oasis	44.713189	82.815143	China
Ejin	42.214243	101.092341	China
Ejina	41.956549	101.113588	China
Ejina oasis	42.085388	101.119236	China
Fuhai	47.039512	87.430547	China
Fukang	44.283333	87.933333	China
Fuyun	46.990608	89.472641	China
Gansu	38.201233	102.673027	China
Ganzhou	38.975100	100.446400	China
Gaotai	39.371096	99.759745	China
Gelintan	38.719452	105.559756	China
Guazhou	40.467839	95.697785	China
Gulang	37.521393	102.912088	China
Guma	37.459974	78.582037	China
Guosasi	37.366088	76.744931	China
Habahe	48.029223	86.272898	China
Haixi	37.329663	97.181119	China
Hami	43.038521	93.841566	China
Hebukesaier	46.794831	85.763796	China
Heihe	39.306035	100.209634	China
Heihe River	39.333333	100.133333	China
Hejing	42.240293	86.400894	China
Heshuo	39.502178	75.945634	China
Hetao	40.612298	107.193041	China
Hetian	37.100000	80.016667	China
Hexi	40.179239	94.665618	China
Hongyashan	38.365243	102.828385	China
Hotan	37.092865	79.858456	China
Huangyang	37.872222	102.847222	China
Huocheng	44.041313	80.831524	China
Hutubi	44.124357	86.802820	China
Huxixincun	40.964600	100.217167	China
ili	43.851315	81.288068	China
Jiayuguan	39.864922	98.188936	China
Jimunai	47.452658	85.886105	China
Jimusaer	44.009607	89.172689	China
Jinchang	38.500518	102.156985	China
Jinchuan	38.592104	102.409614	China
Jinchuanlu	38.577133	102.196999	China
Jinghe	44.608754	82.808563	China
Jingtai	37.563513	103.865706	China
Jinta	40.120586	98.872049	China
Jinta Oasis	39.993197	98.915012	China
Jiuquan oasis	39.716066	98.642836	China
Kaidu-kongqi	41.576616	86.028282	China
Karamay	45.439929	84.921301	China
Kashgar	39.391394	75.852485	China
Kashi	39.539960	76.076446	China
Keping	40.509961	79.064353	China
Keriya	36.855418	81.685232	China
Khagilik	37.859523	77.387676	China
Kongque	41.271317	86.584964	China
Korla	41.706839	86.081672	China
Kuitun	44.430138	85.011905	China
Kuqa	41.554763	82.784609	China
Liangzhou oasis	37.928611	102.639722	China
Lijia	39.332778	100.128889	China
Linchnang	39.378236	100.122157	China
Linze	39.167591	100.184131	China
Linze Research Station	39.345126	100.171497	China
Luntai	41.246201	83.837074	China
Luopu	36.536563	80.747173	China
Manas	44.500000	85.500000	China
Manasi	44.323130	86.304361	China
Marabishi	39.761067	78.501472	China
Markit	38.957231	77.691402	China
Milan	39.250000	88.920000	China
Minfeng	36.889102	82.196471	China
Minle	38.688369	100.702980	China
Minqin	38.597183	103.121495	China
Minqin oasis	38.605895	103.075593	China
Miquan	44.008346	87.680408	China
Mori	43.868681	90.284237	China
Moyu	37.290550	79.694709	China
Nanhu	39.885870	94.103283	China
Nilka	43.776248	82.550519	China
Ningxia	38.172248	106.193018	China
Niya	37.082707	82.778075	China
No. 150 Regiment	44.890659	86.201920	China
Payzawat	39.464167	76.730446	China
Pingchuan	39.336735	100.108382	China
Pishan	37.601268	78.301520	China
Poskam	38.145133	77.228583	China
Qerqen	38.195765	85.486713	China
Qiala	41.080493	86.440496	China
Qinghe	46.257787	90.437087	China
Qingtu	39.114724	103.619721	China
Qira	37.054613	81.048899	China
Qitai	43.931063	89.754540	China
Regiment 121	44.833333	85.550000	China
Ruoqiang	39.026101	88.185660	China
Sangong River	44.167163	88.011635	China
SG ODE	39.340728	100.145656	China
Shandan	38.794657	101.061022	China
Shawan	44.070852	85.787039	China
Shayar	41.280700	82.689330	China
Shidi	38.975100	100.446400	China
Shihezi	44.409088	86.047524	China
Shufu	39.415076	75.736593	China
Shule	39.380328	76.098238	China
Shule River	40.483399	96.960482	China
Subei	39.507320	94.890566	China
Sunan	39.555699	98.967332	China
Suzhou	39.770000	98.480000	China
Tacheng	46.713301	83.085384	China
Tarim River	40.851476	86.976029	China
Taxkorgan	37.785892	75.217239	China
Tiganlik	40.659013	87.797792	China
Tohsun	42.807287	88.586802	China
Tonghu oasis	37.605484	104.913686	China
Tuokexun	41.742377	82.054718	China
Tuoli	46.111241	83.652861	China
Turpan	42.948975	89.131889	China
Urumqi	43.976478	87.530327	China
Waxxari	38.696610	87.376107	China
Weigan River	41.701069	83.228413	China
Wenquan	44.975421	81.008258	China
Wensu	41.255106	80.521992	China
Wujiaqu	44.333485	87.552296	China
Wulanwusu	44.260583	85.783013	China
Wulidong	39.306035	100.209634	China
Wuqia	39.713600	75.208867	China
Wushi	41.201153	79.194805	China
Wusu	44.460928	84.568341	China
Wutumeiren	36.973677	93.091409	China
Wuwei	37.901024	102.566957	China
Xiahao	38.928711	103.598364	China
Xinhe	41.522958	82.573116	China
Xinqiman	40.897086	82.992261	China
Xinyuan	43.459963	83.226174	China
Xiquzhen	38.928711	103.598364	China
Xuebai	38.163928	103.252572	China
Yanqi	42.216456	86.930968	China
Yanqul	23.598493	56.540770	China
Yaoba	38.512881	105.613198	China
Yarkand	38.389553	77.311335	China
Yegibazar	41.286295	83.190411	China
Yili	43.951746	80.989035	China
Yingbaza	41.192192	84.573583	China
Yingjisha	38.852071	76.153989	China
Yingke	38.844728	100.511549	China
Yining	43.933298	81.628951	China
Yiwu	43.242357	94.658777	China
Yongchang	38.255535	101.985183	China
Yuepuhu	39.234752	76.786019	China
Yuli	41.282328	86.262893	China
Yuli County	41.282328	86.262893	China
Yumen	40.346828	97.091887	China
Yuming	46.335840	82.969104	China
Yutian	36.843112	81.908920	China
Yutian–Hotan	36.870570	81.580263	China
Zhangye	38.900000	100.350000	China
Zhungarer	42.853097	90.216999	China
Ain Khudra	28.895666	34.422503	Egypt
Al Fayyum	29.434865	30.647247	Egypt
Al Hayz	28.055000	28.626434	Egypt
Bahariya oasis	28.385161	28.910502	Egypt
Baris	24.677501	30.603123	Egypt
Bir Tarfawi	22.551306	28.665611	Egypt
Dakhla	25.520135	29.126163	Egypt
Dakhla oasis	25.608174	28.916796	Egypt
Dakhleh	25.550941	28.932225	Egypt
El Arag	28.907130	26.436505	Egypt
El Bahrain	28.671708	26.501991	Egypt
El-Kharga	25.453273	30.554968	Egypt
Farafra	27.056532	27.962671	Egypt
Fayoum	29.367481	30.786853	Egypt
Fayum	29.334534	30.767347	Egypt
Feiran oasis	28.705856	33.669006	Egypt
Gharb El-Mawhoub	25.884650	28.566585	Egypt
Kharga oasis	25.452550	30.555723	Egypt
Kurkur	23.900671	32.326959	Egypt
Luxor	25.694873	32.610510	Egypt
Luxor West Nile bank	25.704024	32.627346	Egypt
Mahariq	25.614862	30.646090	Egypt
Moghra	30.253302	28.945797	Egypt
Natrun	30.522563	30.280607	Egypt
Nord Assouan	24.121925	32.898646	Egypt
North Aswan	24.119858	32.899621	Egypt
Paris	23.974412	30.364241	Egypt
Qara	29.614660	26.495658	Egypt
Quseima	30.667560	34.366508	Egypt
Rosetta	31.404646	30.400285	Egypt
Saint Catherine	28.556468	33.975317	Egypt
Saqqara	29.867832	31.231776	Egypt
Saqqâra	29.875764	31.230042	Egypt
Sitra oasis	28.717266	27.015380	Egypt
Siwa	29.206355	25.531078	Egypt
Tebtynis	29.152220	30.772362	Egypt
Wadi Feiran, Sinai	28.713097	33.620027	Egypt
Zawit abu Musallem	22.383443	31.561781	Egypt
Baghshadi	31.616439	55.391904	Iran
Bahrieh	28.487372	53.530819	Iran
Borz-e Bala	25.906900	61.515691	Iran
Ein Fashkha	31.713973	35.452551	Israel
Ein Gedi	31.460250	35.393252	Israel
Elifaz	29.792211	35.024280	Israel
En Yahav	30.663876	35.246340	Israel
Enot Quane	31.716047	35.456088	Israel
Kibbutz Mash’abei-Sadeh	31.002664	34.786105	Israel
Neot Hakikar	30.939877	35.380799	Israel
Neot Smadar	30.052617	35.023408	Israel
Samar	29.831602	35.022126	Israel
Azraq oasis	31.833200	36.822494	Jordan
Gharandal	30.085004	35.208677	Jordan
Palm Terrace	31.537222	35.562500	Jordan
Syr Darya	45.787026	62.058999	Kazakhstan
Al Jufrah	27.809384	16.391543	Libya
Al-Jaghbub	29.687592	24.719412	Libya
Al-Jufra	29.127151	15.943639	Libya
Awjilah	29.128973	21.277483	Libya
Barkat	24.886171	10.185569	Libya
Brak	27.539248	14.271161	Libya
Fewet	24.953832	10.081686	Libya
Gaber Aown	26.804535	13.532111	Libya
Gallo	29.041277	21.541763	Libya
Garat Ouda	25.481858	10.212455	Libya
Gat	24.964207	10.168417	Libya
Ghadames	30.134844	9.499137	Libya
Ghadamis	30.135732	9.499822	Libya
Grand Erg Oriental	30.153711	9.430862	Libya
Hun	29.117428	15.937650	Libya
Jakharrad	29.277229	21.651325	Libya
Kufra	24.189204	23.337465	Libya
Mandria	26.693292	13.316258	Libya
Marada	29.221741	19.208492	Libya
Om Elma	26.798757	13.520077	Libya
Sokna	29.052373	15.777218	Libya
Tanezzuft	25.416203	10.345905	Libya
Umm Al’ maa Lake, Libya	26.710501	13.334738	Libya
Waddan	29.166324	16.145975	Libya
Wadi al-Ajal	26.533971	13.059979	Libya
Zallah	28.556003	17.528531	Libya
Abeir	20.488734	-12.327483	Mauritania
Abteili	19.600868	-12.601397	Mauritania
Aghad	20.048401	-13.014967	Mauritania
Aghlaoua	20.461196	-12.357390	Mauritania
Agmeimine	19.888297	-13.048992	Mauritania
Agnana	18.822171	-11.783707	Mauritania
Agueni	20.522401	-13.143454	Mauritania
Aguerj Gassama	17.467151	-11.378876	Mauritania
Ahel el Taya	20.272702	-13.226901	Mauritania
Akenjeret	19.874492	-12.714521	Mauritania
Amdir El Kbir	20.587550	-12.927331	Mauritania
Aneffig	20.285746	-13.212431	Mauritania
Aouinet Ahel	20.608295	-13.105066	Mauritania
Aoujeft	20.027611	-13.056566	Mauritania
Aout	20.600305	-12.920146	Mauritania
Arjam	18.757551	-11.663246	Mauritania
Atar	20.532188	-13.042937	Mauritania
Azoueiga	19.877018	-13.548691	Mauritania
Beddamez	20.016422	-13.062800	Mauritania
Benouig	19.986637	-12.725466	Mauritania
Bir Amouchekteri	20.572198	-12.950472	Mauritania
Bou `Agal	20.455311	-12.374529	Mauritania
Djebeib	16.373110	-11.742883	Mauritania
Dmeyyene	20.475952	-13.132002	Mauritania
Doueir	19.762352	-12.821391	Mauritania
Doueirat	20.484296	-13.067770	Mauritania
Echeoul	20.547751	-13.029319	Mauritania
El Baq'a	20.475144	-12.345972	Mauritania
El Beida	20.331009	-13.172347	Mauritania
El Gawiya	16.465545	-10.816382	Mauritania
El Gleitat	19.981310	-13.289373	Mauritania
El Greinat	20.357551	-13.141054	Mauritania
El Hofra	19.855205	-13.579020	Mauritania
El Hofra 2	19.842701	-13.595649	Mauritania
El Housseiniya	17.738300	-12.249566	Mauritania
El Ketara	18.818628	-11.699364	Mauritania
El Meddah	19.925697	-13.323034	Mauritania
El Oudei	20.033765	-13.062208	Mauritania
Emdaq	19.876720	-12.935220	Mauritania
Enikel	19.905960	-13.545507	Mauritania
Et Taouaz	20.690101	-12.893224	Mauritania
Et Teintane	19.849892	-13.016441	Mauritania
Far aoun	19.832802	-12.973719	Mauritania
Hammoud	20.025853	-13.035357	Mauritania
Hassi Ahmed	16.369969	-10.386530	Mauritania
Hassi el Baraka	16.349752	-10.341422	Mauritania
Hassi el Mouilah	20.182184	-13.223275	Mauritania
Imougayene	19.944083	-12.674222	Mauritania
Iriji	18.780674	-11.686674	Mauritania
Jouali	19.957682	-13.026077	Mauritania
Kbir	19.918218	-12.892771	Mauritania
Kiffa	16.683333	-11.533333	Mauritania
Lac Aleg	17.068348	-13.951099	Mauritania
Marad	19.995036	-13.072071	Mauritania
Mbarek	19.811160	-12.807935	Mauritania
Mhairet	20.278909	-13.002164	Mauritania
Mheinine	20.655892	-12.890373	Mauritania
Nama Agassar	19.898124	-13.355451	Mauritania
Ouadane	20.931317	-11.626311	Mauritania
Ouagchodda	19.813000	-12.973587	Mauritania
Rachid	18.793430	-11.690193	Mauritania
Rkeina	20.640304	-13.004737	Mauritania
Soueiguyia	20.270439	-13.121409	Mauritania
Tachot	20.395529	-13.112230	Mauritania
Taghadet Oulad Alamine	16.930225	-11.725995	Mauritania
Taizent	20.427900	-13.136212	Mauritania
Tanghal Ould Amghar	20.011210	-13.131193	Mauritania
Tanouchert	20.717134	-11.881847	Mauritania
Taouaz	20.718460	-12.878341	Mauritania
Tenouamend	19.733342	-12.710479	Mauritania
Terjit	20.251803	-13.087342	Mauritania
Tichitt	18.443152	-9.493032	Mauritania
Tidjikja	18.553464	-11.428836	Mauritania
Tifougag	20.061765	-13.067094	Mauritania
Timagazine	19.961429	-12.803589	Mauritania
Tinkara	16.563705	-10.437494	Mauritania
Toueizikt	20.648554	-13.034457	Mauritania
Toungad	20.057619	-13.134402	Mauritania
Ziret	20.579987	-13.049380	Mauritania
El Novillo	23.927778	-110.224167	Mexico
Arroyo El Novillo	23.927778	-110.224167	Mexico
Barajitas	28.047533	-111.200893	Mexico
Barajitas Canyon	28.032104	-111.087715	Mexico
Boca de Magdalena	27.067261	-112.176754	Mexico
Bocana	29.672265	-114.914249	Mexico
Cadejé	26.553076	-111.770326	Mexico
Cañón Berrendo	30.528883	-115.133833	Mexico
Cañón Guadalupe	32.153865	-115.788937	Mexico
Cañón Palomar	31.925597	-115.715408	Mexico
Carambuche	26.219097	-112.020658	Mexico
Cataviña	29.735095	-114.680788	Mexico
Churince	26.830443	-102.139271	Mexico
Comondú	26.060627	-111.821746	Mexico
Complejo La Soledad	25.045103	-111.590089	Mexico
Cuatro Ciénagas	26.972826	-102.094362	Mexico
Cuatro Cienegas	26.830443	-102.139271	Mexico
Cuatro Ciénegas	26.981420	-102.046119	Mexico
El Alamo	27.108350	-112.928758	Mexico
El Caballo	27.997024	-111.086075	Mexico
El Chorro	23.438889	-109.804167	Mexico
El Pilar	24.471539	-111.001277	Mexico
El Sauzal	27.523788	-112.948193	Mexico
El Triunfo	23.805240	-110.108501	Mexico
Guadalupe	26.919619	-112.405451	Mexico
Guadalupe island	29.164770	-118.295202	Mexico
Heroica Mulegé	26.885864	-111.989394	Mexico
La Becerra	26.878229	-102.138033	Mexico
La Candelaria	23.073017	-110.029917	Mexico
La Libertad	28.390678	-113.670458	Mexico
La Navaja	28.017549	-111.095398	Mexico
La Presa Buena Mujer oasis	24.089702	-110.191881	Mexico
La Purísima	26.186889	-112.078022	Mexico
La Purísima Concepcioón	26.199131	-112.050468	Mexico
La Soledad	24.812253	-110.813978	Mexico
Las Ánimas	24.456917	-110.734314	Mexico
Las Barajitas	28.055189	-111.154681	Mexico
Las Pirinolas	28.061858	-111.049106	Mexico
Los Dolores	24.910480	-111.292061	Mexico
Los Encinitos	24.035463	-110.138964	Mexico
Misión San Javier	25.857915	-111.546542	Mexico
Mision Santa María	29.742740	-114.551101	Mexico
Nacapule	28.015274	-111.050669	Mexico
Nacapule Canyon	28.017106	-111.055392	Mexico
Nuestra Señora de Guadalupe	26.869116	-112.258501	Mexico
Nuestra Señora de los Dolores	24.886072	-111.032817	Mexico
Ojo de Agua	26.327801	-111.981833	Mexico
Palmar de Balbino	23.097159	-109.702721	Mexico
Poza Azul	26.922685	-102.120235	Mexico
Poza Churince	26.840344	-102.133836	Mexico
Pozas Rojas	26.870870	-102.020603	Mexico
Primer Agua (Loreto)	26.006185	-111.343025	Mexico
Punta San Pedro	23.393056	-110.208333	Mexico
Rancho Bacatete	28.068064	-110.358998	Mexico
Rancho Santa Úrsula	28.097520	-110.844056	Mexico
Rıo Mesquites	26.916620	-102.103799	Mexico
San Antonio	23.810570	-110.057339	Mexico
San Bartolo	23.737061	-109.840557	Mexico
San Francisco Borja de Adac	28.746242	-113.751975	Mexico
San Francisco Javier de Viggé Biaundo	25.857850	-111.546027	Mexico
San Ignacio Kadakaamán	27.283168	-112.902177	Mexico
San Ignacito	28.738896	-113.847603	Mexico
San Isidro	26.206389	-112.048333	Mexico
San Joaquin	27.174434	-112.867517	Mexico
San Jose	29.36462	-114.74900	Mexico
San José de Magdalena	27.062531	-112.234558	Mexico
San José del Cabo	23.053503	-109.685591	Mexico
San Juan Bau	26.233698	-111.483151	Mexico
San Luis Gonzaga	25.055283	-110.885718	Mexico
San Miguel de Comondú	26.036714	-111.832832	Mexico
San Nicolás	26.545619	-111.552447	Mexico
San Pedro Mártir	30.539183	-115.142750	Mexico
San Zacarias	27.139497	-112.905081	Mexico
Santa Gertrudis	28.050077	-113.085974	Mexico
Santa Rosa de las Palmas	23.454484	-110.223728	Mexico
Santa Rosalia de Mulege	26.885386	-111.990177	Mexico
Santiago de los Coras	23.482389	-109.717998	Mexico
Sierra San Juan de la Costa	24.361585	-110.703187	Mexico
Tajo Canyon	32.264092	-115.881631	Mexico
Oasis Sulganain bayanburd	43.584700	100.044800	Mongolia
Altai 01	44.890340	95.937660	Mongolia
Altai 02	44.637000	94.858605	Mongolia
Atas Inges	43.304133	96.149934	Mongolia
Baruun Tooroi	50.034810	93.386924	Mongolia
Bayantooroi	44.887549	96.786822	Mongolia
Bayan-Undur	43.713043	98.368990	Mongolia
Bugat	44.761000	94.368659	Mongolia
Bulgan	46.062041	91.411342	Mongolia
Burun-Muhur Ereg oasis			Mongolia
Burun-Sukhaityn oasis			Mongolia
Ekhiin-Gol oasis	43.247294	99.000063	Mongolia
Gurvantes 01	42.853053	101.814480	Mongolia
Gurvantes 02	43.108714	100.640069	Mongolia
Gurvantes 03	43.311083	99.932269	Mongolia
Khadag-Bulak oasis			Mongolia
Khav-Chig oasis			Mongolia
Khongoryn els	43.765200	102.261800	Mongolia
Narandaats	43.458076	100.449223	Mongolia
No Name	43.604800	99.649300	Mongolia
Noyon	42.412554	102.251630	Mongolia
Shar Khulst	43.359167	97.884820	Mongolia
Shinejinst 01	42.941274	99.211692	Mongolia
Shinejinst 02	43.179000	99.297435	Mongolia
Tsagaan bogd station	42.917306	98.835283	Mongolia
Tsagan-Dersnii Bulak oasis			Mongolia
Tsogt 01	44.497000	96.396328	Mongolia
Tsogt 02	44.732122	96.635510	Mongolia
Uyench	45.555100	91.844400	Mongolia
Addis	29.702277	-7.988988	Morocco
Adis	29.687043	-7.982611	Morocco
Agafay	31.498111	-8.169806	Morocco
Agalgal	29.679763	-8.000179	Morocco
Agdz	30.702125	-6.443471	Morocco
Aghgoumi	30.287521	-7.076835	Morocco
Agmour	30.073788	-7.407363	Morocco
Ag-ni	30.206105	-7.284455	Morocco
Agoulf	30.368281	-6.679250	Morocco
Aguerlouy	29.238842	-9.172850	Morocco
Air Hammou	31.369490	-5.991325	Morocco
Aït el Meskine	31.472102	-5.436816	Morocco
Ait Ibourk	31.103598	-7.305030	Morocco
Ait Issa	30.434854	-6.932177	Morocco
Ait Melk	30.705746	-6.242560	Morocco
Ait Mrbat	30.405556	-6.914331	Morocco
Ait Ouabelli	29.229140	-8.537619	Morocco
Ait Oubali	29.213	-8.535	Morocco
Ait Zemraou	30.057937	-5.504451	Morocco
Aka-Ghuiren	29.996869	-7.539594	Morocco
Akka	29.415817	-8.256934	Morocco
Akka	29.415633	-8.257699	Morocco
Al Ayoun	29.640293	-7.897290	Morocco
Allogoum	30.273	-6.828	Morocco
Amazzr	30.449804	-6.955702	Morocco
Amekchoud	31.215717	-6.586231	Morocco
Amtezguine	30.331254	-7.119664	Morocco
Amtoudi oasis	29.243461	-9.185910	Morocco
Anghrif	29.649606	-7.957161	Morocco
Aoufous	31.690569	-4.185771	Morocco
Asadir Tissint	29.899744	-7.298516	Morocco
Assa	28.607148	-9.426817	Morocco
Assa	28.607148	-9.426817	Morocco
Assaka	30.355014	-6.724027	Morocco
Assaragh	30.216580	-7.580192	Morocco
Azegza	30.490829	-7.050461	Morocco
Ba Touroug	31.559303	-4.707591	Morocco
Bel Haj	30.520680	-7.076392	Morocco
Bou Imazen	29.643873	-8.199044	Morocco
Boudenib	31.939918	-3.596807	Morocco
Boudib	31.218857	-4.831098	Morocco
Boulmane	31.348809	-5.998602	Morocco
Boutaghat	31.482618	-5.406311	Morocco
Bouteghrar	31.387910	-6.132335	Morocco
Dadès river	31.395452	-5.988627	Morocco
Drâa river	29.214526	-7.915634	Morocco
El Kelaa	31.232358	-6.143117	Morocco
El Maktra	30.456141	-5.939260	Morocco
Erfoud	31.451062	-4.243598	Morocco
Errachidia	31.963302	-4.456198	Morocco
Faguint	30.305408	-6.749082	Morocco
Fam el hisn	29.007000	-8.894000	Morocco
Fezouata	30.252687	-5.710301	Morocco
Figuig	32.100163	-1.231556	Morocco
Foum el Oued	30.348304	-6.837723	Morocco
Foum Zguid	30.082574	-6.877527	Morocco
Foumlahcen	29.007	-8.894	Morocco
Goulmina	31.687713	-4.965177	Morocco
Gourrama	32.297597	-3.982518	Morocco
Guercif	34.255309	-3.343200	Morocco
Harbi	29.138801	-8.947819	Morocco
Hassilabiad	31.140942	-4.020832	Morocco
Iâadouane	31.516676	-5.526027	Morocco
Ichmarine	31.526404	-5.556278	Morocco
Icht	29.052095	-8.841348	Morocco
Idelssane	30.980296	-6.635802	Morocco
Ifrane anti atlas	29.215	-9.488	Morocco
Ifri	32.075845	-4.385489	Morocco
Igadoun	30.592959	-6.149225	Morocco
Igdi	29.203981	-8.387588	Morocco
Ighir	29.126757	-8.943275	Morocco
Iguissel	29.077616	-9.988105	Morocco
Igwaz	29.119264	-8.934231	Morocco
Ikniouen	31.170283	-5.679988	Morocco
Imaghatn	30.213330	-7.163138	Morocco
Imitek	29.656488	-8.259251	Morocco
Imrhane	31.098711	-6.582501	Morocco
Isfalene	30.796760	-6.479911	Morocco
Issafen	29.856311	-8.532865	Morocco
Issar Ghine	29.947376	-7.571002	Morocco
Jdid	30.332422	-6.739237	Morocco
Jorf	31.502414	-4.384561	Morocco
Kesbet Rmal	29.987895	-5.550436	Morocco
Ksar	31.146512	-5.080176	Morocco
Ktaoua	29.989335	-5.513707	Morocco
Lahsene Ali	30.069710	-7.372435	Morocco
Lala Mlouka	29.209	-9.365	Morocco
Lamhamid	30.121676	-6.879316	Morocco
Lhamad	29.239411	-8.371430	Morocco
Marrakesh	31.688165	-8.023305	Morocco
Mellaab	31.549347	-4.841612	Morocco
Merzouga	31.099779	-4.011190	Morocco
Mezguita	30.679259	-6.372724	Morocco
M'Hamid	29.813013	-5.725391	Morocco
Missour	33.031683	-3.999085	Morocco
Mrhimina	29.794801	-7.156925	Morocco
M'Semrir	31.699920	-5.813337	Morocco
Nsoula	30.228320	-6.989319	Morocco
Ou Drar	30.293147	-5.796589	Morocco
Ouarzazate	30.92084	-6.952506	Morocco
Oued Mird	30.412411	-5.404711	Morocco
Oulad Driss	29.832070	-5.653945	Morocco
Ouled Yaoub	30.466453	-5.999990	Morocco
Outat El-Haj	33.340528	-3.729472	Morocco
Qasbat Ej Jou	29.881032	-7.406400	Morocco
Rachidia	31.936410	-4.435757	Morocco
Rissani	31.280338	-4.258903	Morocco
Sahli	31.949879	-3.527707	Morocco
Sidi El Mehdaoui	29.492228	-7.999768	Morocco
Sidi Rezzoug	29.766746	-7.694867	Morocco
Sigilmassa	31.268913	-4.278750	Morocco
Skoura	31.066713	-6.564353	Morocco
Source Bleu de Meski	31.857594	-4.272159	Morocco
South Goulmima	31.600000	-4.950000	Morocco
Taaouilite	31.118859	-5.165892	Morocco
Tadafelt	31.437639	-5.426407	Morocco
Tafilalet	31.377222	-4.285278	Morocco
Tafilalt-Ziz river	32.275014	-4.524190	Morocco
Tagant	29.122	-9.783	Morocco
Taghbalt	30.622665	-5.342805	Morocco
Tagherat	29.902355	-8.536563	Morocco
Taghia	31.784054	-6.068221	Morocco
Taghjijt	29.057106	-9.430926	Morocco
Taghla	29.703268	-7.990423	Morocco
Tagonite	29.976337	-5.581625	Morocco
Takacha	30.847005	-5.265400	Morocco
Talat	30.688970	-6.303593	Morocco
Taltfraout	31.811229	-4.967206	Morocco
Tamanarte	29.162	-8.954	Morocco
Tamazmout	30.669697	-6.139588	Morocco
Tamda	30.214699	-6.963519	Morocco
Tamgroute	30.254677	-5.684273	Morocco
Tamsoult	30.123805	-7.466145	Morocco
Tansikhte	30.685752	-6.186093	Morocco
Tanzida	29.950943	-7.311423	Morocco
Tarda	31.805697	-4.596331	Morocco
Tardirhoust	31.878928	-4.914804	Morocco
Tastlift	30.373136	-6.869419	Morocco
Tata	29.759021	-7.983536	Morocco
Tawrirt	29.726526	-7.987227	Morocco
Tazarine	30.774607	-5.559096	Morocco
Tazart	29.660693	-7.940308	Morocco
Tazenakht	31.874073	-4.326379	Morocco
Ternata	30.385573	-5.836100	Morocco
Tigane	29.608520	-8.017572	Morocco
Tighmert	28.943213	-9.935064	Morocco
Tikoutar	31.536228	-5.551391	Morocco
Tilas	30.277754	-7.063739	Morocco
Tiliouine	31.255658	-6.987961	Morocco
Tilmi	31.815985	-5.768363	Morocco
Timit	31.283376	-5.537915	Morocco
Tinejdad	31.514633	-5.029215	Morocco
Tinerhir	31.547198	-5.567327	Morocco
Tinfou	30.208914	-5.621520	Morocco
Tinirhjt	30.771821	-6.453627	Morocco
Tinjdad	31.495631	-5.034040	Morocco
Tinzouline	30.509310	-6.085460	Morocco
Tiskamoudine	29.970219	-7.555203	Morocco
Tissint	29.899744	-7.298516	Morocco
Tizgui	29.210632	-8.536557	Morocco
Tlit	30.234983	-7.042143	Morocco
Tougrare	29.035263	-9.460614	Morocco
Tourar	30.480349	-7.042963	Morocco
Touzounine	29.226379	-8.340851	Morocco
Yasmina	31.217758	-3.977819	Morocco
Zagora	30.345477	-5.825210	Morocco
Zaouia De Sidi Elmokhtar Ben Ali	30.178809	-5.541545	Morocco
Zaouia Sidi Abdellali	31.523230	-5.526128	Morocco
Zouala	31.783333	-4.233333	Morocco
Zrigat	31.635682	-4.206776	Morocco
Goanikontes	-22.666218	14.819330	Namibia
Kuiseb river	-23.565502	15.049985	Namibia
Orange river	-28.707504	17.470386	Namibia
Tsaobis Leopard	-22.381917	15.729678	Namibia
Bilma	18.692829	12.922112	Niger
Chirfa	20.955676	12.339330	Niger
Djado	21.015990	12.307626	Niger
Fachi	18.105955	11.583833	Niger
Kawar	19.081169	12.909649	Niger
Kirkou	18.991540	12.895004	Niger
Mainé soroa	13.213645	12.027966	Niger
Seguedine	20.197914	12.968608	Niger
Timia	18.060929	8.667883	Niger
Kaigama	13.294739	11.588842	Nigeria
Kajemarum	13.305000	11.028833	Nigeria
Kuluwu	13.229021	11.607969	Nigeria
Adam	22.382541	57.527643	Oman
Al ‘Aqr	23.072777	57.665864	Oman
Al ‘Ayn	23.072954	57.662396	Oman
Al Hamra	23.118019	57.282104	Oman
Al Hasn	22.800361	59.242012	Oman
Al Jabal al Akhdar	22.996861	57.781434	Oman
Al Jaylah	22.791556	59.122016	Oman
Al Kamil	22.215264	59.207877	Oman
Al Khashbah	22.658368	58.038826	Oman
Al Mintirib	22.558738	58.025644	Oman
Al Mudayrib	22.610141	58.679825	Oman
Al Quraytayn	22.885949	57.938676	Oman
Al-Ghail	23.150781	57.205625	Oman
Al-Rawdha	22.880308	58.216600	Oman
Ash Sharayjah	23.068937	57.658366	Oman
Bahla	22.975245	57.298099	Oman
Balad Seet	23.190630	57.387774	Oman
Barka	23.662910	57.855851	Oman
Batinah	23.986252	56.491494	Oman
Bilad Bani Bu Hasan	22.070000	59.280000	Oman
Birkat al Mawz	22.921616	57.672546	Oman
Birkat Al Mouz	22.927377	57.680240	Oman
Dakhilia	22.989208	57.141108	Oman
Dank	23.552633	56.268273	Oman
Dhahira	23.683333	56.500000	Oman
Harat Bida	22.800329	59.238691	Oman
Ibri	23.202407	56.521162	Oman
Imty	23.000748	57.785999	Oman
Izki	22.927556	57.766628	Oman
Jaalan bani Abou Ali	22.02106	59.314478	Oman
Jaalan Bani Bou Ali	22.023153	59.315600	Oman
Jebel Akhdar	23.193367	57.369970	Oman
Khabura	23.952148	57.085743	Oman
Maqta	22.829562	58.993323	Oman
Masayrat ar Ruwajah	23.044302	57.669999	Oman
Mibam	22.770912	59.215129	Oman
Misfat Al-Abryeen	23.138688	57.311375	Oman
Muharram	23.023386	57.995612	Oman
Nizwa	22.932792	57.528368	Oman
Qasha’	23.066943	57.663077	Oman
Rustaq	23.391127	57.431254	Oman
Salut	22.751180	57.225839	Oman
Samad Al Shan	22.801213	58.147750	Oman
Samail	23.300000	57.980000	Oman
Sayh Qatanah	23.078217	57.669088	Oman
Sayma	22.786509	59.229080	Oman
Sayq	23.071342	57.635714	Oman
Shuh	22.745635	57.224162	Oman
Sohar	24.354004	56.708233	Oman
Sui	22.775918	59.225900	Oman
Taww	23.500450	57.957451	Oman
Umq Bi’r	22.732456	59.162687	Oman
Wadi al Nakheel	17.597995	55.252450	Oman
Wadi Bani Khalid	22.599457	59.084857	Oman
Wadi Fida	23.508767	56.460693	Oman
Wadi Khutwah	24.315442	56.123539	Oman
Wadi Manakhir	23.091622	57.729920	Oman
Wadi Qurayat	23.087417	58.855802	Oman
Wadi Shab	22.837231	59.242606	Oman
Wadi Tiwi	22.732882	59.162060	Oman
Wadi-Tiwi low	22.821136	59.257433	Oman
Cholistan	29.325608	71.456252	Pakistan
Dera Ismail Khan	31.846480	70.882873	Pakistan
Hingol National Park	25.513995	65.517993	Pakistan
Pasu	36.463317	74.895168	Pakistan
Turbat	26.012881	63.053148	Pakistan
Beit Hasan	32.238673	35.400415	Palestine
Alpacoto	-10.862344	-77.503397	Peru
Amancaes	-11.9950	-77.0280	Peru
Amara-Ullujalla	-14.7030	-75.7380	Peru
Amoquinto	-17.268152	-71.449205	Peru
Ancón	-11.7170	-77.1650	Peru
Asia sector A	-12.721186	-76.538103	Peru
Asia sector B	-12.759801	-76.468806	Peru
Atico	-16.2510	-73.4450	Peru
Atiquipa	-15.784306	-74.333	Peru
Aucallama	-11.585845	-77.105589	Peru
Cabeza de Toro	-13.532712	-75.934308	Peru
Cachendo	-17.014271	-71.790093	Peru
Calango	-12.5280	-76.6300	Peru
Capac	-15.805048	-74.175629	Peru
Carabayllo	-11.8050	-77.0680	Peru
Caral	-10.9340	-77.5260	Peru
Caringa	-12.309618	-76.704816	Peru
Cerro Cabras	-8.0500	-79.0333	Peru
Cerro Campana	-7.9667	-79.1000	Peru
Cerro Compana	-7.985964	-79.108444	Peru
Cerro Faclo	-7.2633	-79.5407	Peru
Cerro Huacos	-8.8002	-78.4434	Peru
Cerro Lechuza	-13.8866	-76.3827	Peru
Cerro Reque	-6.8707	-79.7730	Peru
Cerros Paiján	-7.692145	-79.253185	Peru
Cerros San Cristobal	-9.071204	-78.311577	Peru
Chancayllo	-11.4535	-77.2976	Peru
Chillón	-11.901725	-77.092853	Peru
Chuque	-15.991665	-73.957786	Peru
Cicasos	-12.3660	-76.6980	Peru
Collique	-11.9000	-77.0020	Peru
Granados	-11.397684	-77.231780	Peru
Huambo	-15.948420	-73.963567	Peru
Huaquina	-13.141532	-76.192168	Peru
Iguanil	-11.4010	-77.1750	Peru
Ilo	-17.714499	-71.250839	Peru
Isla Independencia-La Vieja	-14.277763	-76.204414	Peru
Jahuay	-15.375935	-74.737269	Peru
Jime	-12.339077	-76.751736	Peru
Km22	-11.8710	-76.9960	Peru
La Paloma	-12.446140	-76.716684	Peru
Lachay	-11.370106	-77.356245	Peru
Lapa Lapa	-12.579266	-76.629603	Peru
Las Lomas	-16.4246	-72.9702	Peru
Limán	-10.822630	-77.617785	Peru
Loma de Armara	-14.749016	-75.670088	Peru
Loma de Ullujalla	-14.703000	-75.738000	Peru
Lomas de Lachay	-11.370106	-77.356245	Peru
Lomas de Mongon	-9.631537	-78.308717	Peru
Lúcumo	-12.2030	-76.8850	Peru
Lupín	-10.397275	-77.946478	Peru
Lurihuasi	-10.884000	-77.555000	Peru
Lurín	-12.1970	-76.7740	Peru
Mala	-12.739718	-76.547946	Peru
Malanche	-12.2947	-76.7234	Peru
Manchay	-12.1250	-76.8470	Peru
Mangomarca	-11.9990	-76.9710	Peru
Marcona	-15.124602	-75.024	Peru
Mejía	-17.052167	-71.844270	Peru
Mollendo	-16.971962	-71.989713	Peru
Mongón	-9.625151	-78.323638	Peru
Morro de Sama	-18.0065	-70.8616	Peru
Morro Guañape	-8.431732	-78.923557	Peru
Morro Quemado	-14.354957	-76.113534	Peru
Nasca	-14.838497	-74.979855	Peru
Nuevo Cañete	-13.174395	-76.237927	Peru
Ochiputur	-8.164911	-78.936827	Peru
Ocoña	-16.441171	-72.844691	Peru
Pachacamac	-12.1860	-76.8250	Peru
Pacta	-12.278324	-76.769762	Peru
Palpa	-14.557860	-75.217089	Peru
Pativilca	-10.675502	-77.765880	Peru
Payet	-11.9460	-77.0180	Peru
Península de Illescas	-5.956009	-81.046974	Peru
Piedra Campana	-12.633885	-76.662889	Peru
Portillo	-12.2557	-76.7820	Peru
Punta Corio	-17.217417	-71.596641	Peru
Puquio	-11.8230	-76.9750	Peru
Qda. de Burros	-18.0223	-70.8337	Peru
Quebrada Verde	-12.119942	-76.518426	Peru
Quilmaná	-12.8380	-76.4530	Peru
Retamal	-12.1324	-76.8918	Peru
Sama Grande-Locumba	-17.767950	-70.508615	Peru
San Fernando	-15.122504	-75.334109	Peru
San Gayán	-13.8397	-76.4468	Peru
San Lorenzo	-12.076466	-77.228570	Peru
Supe	-10.760583	-77.677570	Peru
Tacahuay	-17.7826	-71.0982	Peru
Tacna	-17.8333	-70.2500	Peru
Villa María	-12.134590	-76.9150	Peru
Virú	-8.315632	-78.800732	Peru
Yuta	-16.959283	-72.082977	Peru
Zorritos	-12.155733	-76.905882	Peru
Al Mahani	22.531910	40.491190	Saudi Arabia
Abar Sh'ib Hadda	22.948023	41.636754	Saudi Arabia
Abu Raqah	27.104936	37.184719	Saudi Arabia
ad Disah	25.569943	39.346613	Saudi Arabia
al Akhal	23.309845	39.856175	Saudi Arabia
al 'Ayn	25.883980	39.321630	Saudi Arabia
al Birkah	22.18522	40.72541	Saudi Arabia
Al Hassa	25.270928	49.690635	Saudi Arabia
al Hegrieah	23.805030	40.308870	Saudi Arabia
al Huwayyit	25.639099	40.389437	Saudi Arabia
al Khalf	25.068209	40.443735	Saudi Arabia
Al kharj	24.215677	47.260500	Saudi Arabia
al Malbanah	23.159160	39.513510	Saudi Arabia
Al Qu'tubah	21.931467	40.405214	Saudi Arabia
al Wadi	25.646041	39.237672	Saudi Arabia
Al-Ahsa	25.420747	49.620420	Saudi Arabia
Aldesa Valley	27.633952	36.517551	Saudi Arabia
Almahani	22.502010	40.439230	Saudi Arabia
Al-Qatif	26.545941	49.986266	Saudi Arabia
Al-Thamad	25.531486	39.331478	Saudi Arabia
AlUla	26.600184	37.935531	Saudi Arabia
Ar Rubad	23.178254	39.524859	Saudi Arabia
Arne	22.858750	40.578400	Saudi Arabia
as Sidr	23.458700	39.770690	Saudi Arabia
as Sulaymi	26.290396	41.367974	Saudi Arabia
Bidat Nathil	27.047219	40.416691	Saudi Arabia
Bi'r Aba al Qazaz	26.775831	36.692246	Saudi Arabia
Bi'r al Bayda	26.843335	36.901921	Saudi Arabia
Bir Ghadiyah	24.020278	40.300397	Saudi Arabia
Bi'r Khurbah	26.152140	37.301290	Saudi Arabia
Dha'a	26.612843	37.700135	Saudi Arabia
Dumat al Jandal	29.810597	39.875976	Saudi Arabia
Far/Fara	22.612449	40.550283	Saudi Arabia
Fara'a	23.329455	39.856662	Saudi Arabia
Fawdat Wadi ad Diakah	22.996069	41.634567	Saudi Arabia
Ha’it oasis	25.983366	40.477585	Saudi Arabia
Hadhah	22.620480	40.596450	Saudi Arabia
Hajar	23.019560	39.728660	Saudi Arabia
Hulayfah Kharibah	25.933130	40.738100	Saudi Arabia
Huwayyit	25.704996	40.446936	Saudi Arabia
Jailah	26.535380	37.740100	Saudi Arabia
Jathyooth	26.074990	37.809920	Saudi Arabia
Jubbah	28.028370	40.938270	Saudi Arabia
Jussah	23.326654	40.297091	Saudi Arabia
Karanif	25.809053	40.533652	Saudi Arabia
Khaybar	25.586160	39.382400	Saudi Arabia
Khaybar oasis	25.730286	39.269475	Saudi Arabia
Madâ’in Sâlih	26.830650	37.970351	Saudi Arabia
Mahani	22.501030	40.424670	Saudi Arabia
Maktan clan	22.503941	40.506050	Saudi Arabia
Mukhlif	23.106639	39.710832	Saudi Arabia
Qaran	23.284580	40.319550	Saudi Arabia
Qurayyah	28.893187	36.179952	Saudi Arabia
Rajajil	29.816374	40.227070	Saudi Arabia
Rawdat-Khuraim	25.385955	47.285577	Saudi Arabia
Safinah	23.136991	40.547234	Saudi Arabia
Samhah	25.919939	39.356486	Saudi Arabia
Saylat Qafil?	22.985320	40.591620	Saudi Arabia
Seat Hilal	22.519810	40.468300	Saudi Arabia
Shalal	26.784063	37.797842	Saudi Arabia
Sheikh Lafi Badin	23.101440	40.614940	Saudi Arabia
Sufaynah	23.136080	40.557260	Saudi Arabia
Suwayriqiyah	23.343057	40.321291	Saudi Arabia
Ta'if	22.397333	41.400060	Saudi Arabia
Tayma	27.636815	38.554148	Saudi Arabia
Tharbah	26.863234	37.739363	Saudi Arabia
The bed	25.586160	39.382400	Saudi Arabia
Turabah	21.199920	41.649620	Saudi Arabia
Umm al 'Iyal	23.253700	39.567420	Saudi Arabia
Umm Dharb	25.608340	38.457070	Saudi Arabia
Wadi Hanaz	23.344678	39.850716	Saudi Arabia
Wadi Tnaidib	25.603740	39.337590	Saudi Arabia
Damascus Oasis	33.514468	36.425892	Syria
Palmyra	34.541391	38.267696	Syria
Tadmor	34.541059	38.270581	Syria
Tadmor oasis	34.542803	38.268929	Syria
Ain el Karma	34.405159	7.983762	Tunisia
Al-Hammah	33.887255	9.610113	Tunisia
Bazma	33.658921	9.007402	Tunisia
Bchelli	33.617651	8.910130	Tunisia
Bechni	33.489139	8.782807	Tunisia
Bechri	33.788088	8.774125	Tunisia
Ben Ariene	33.827308	7.609913	Tunisia
Ben Mhemed	33.579154	8.863979	Tunisia
Bir el Melah	33.816285	7.699283	Tunisia
Bir Roumi	33.315092	7.964722	Tunisia
Blidet	33.585712	8.835638	Tunisia
Bou Hamza	33.435506	8.998646	Tunisia
Bou Said	34.104666	9.991471	Tunisia
Bouabdallah	33.763122	8.878199	Tunisia
Bouchamma	33.903031	10.067431	Tunisia
Bourgine	33.578595	8.981920	Tunisia
Bsissi	33.966685	10.002494	Tunisia
Castilla (Djerid)	33.929178	8.141900	Tunisia
Ceddada	34.018737	8.297392	Tunisia
Chakmou (Djerid)	34.097124	8.205363	Tunisia
Chamsa	33.953643	8.034290	Tunisia
Chebika	34.316582	7.938548	Tunisia
Chenchou	33.895162	9.883336	Tunisia
Cheneni	33.877050	10.076331	Tunisia
Chenini	32.908901	10.280643	Tunisia
Chott Salhia	33.601853	9.001454	Tunisia
ChottEssalem	33.900311	10.097550	Tunisia
Chouchet	33.827308	7.609913	Tunisia
Degache	33.987697	8.235603	Tunisia
Dergine el Ameur	33.469410	8.718668	Tunisia
Dghoumes Montagne (Djerid)	34.043764	8.335745	Tunisia
Dghoumes Plaine (Djerid)	34.022014	8.332057	Tunisia
Dhafria	34.202744	7.847914	Tunisia
Djemna	33.571240	9.010024	Tunisia
Djerid	33.903908	8.149872	Tunisia
Djerid (Chamsa)	33.953311	8.036416	Tunisia
Douz	33.460099	9.005904	Tunisia
Douz	33.454539	9.004927	Tunisia
El Faouar	33.361592	8.674552	Tunisia
El Fauoar	33.441524	8.706299	Tunisia
El Gattaya	33.665074	8.885390	Tunisia
El Ghoula	33.511741	8.949091	Tunisia
El Guettar	34.330423	8.945420	Tunisia
El Hsay	33.403636	9.002819	Tunisia
Elgolaa	33.477353	9.009666	Tunisia
Errached	33.750164	7.646842	Tunisia
Essouni	33.917215	8.138265	Tunisia
Faouz	33.761496	7.601836	Tunisia
Faraj	33.867216	7.824749	Tunisia
Fatnassa	33.786917	8.761554	Tunisia
Franigue	33.452267	8.644314	Tunisia
Gabes	33.879179	10.076072	Tunisia
Gabès oasis	33.877663	10.076995	Tunisia
Gafsa	34.406361	8.769304	Tunisia
Garret Jaballah	33.831957	7.721203	Tunisia
Ghannouche	33.949544	10.051942	Tunisia
Ghardgaya	33.858456	7.963581	Tunisia
Ghidma	33.433392	8.808301	Tunisia
Graad	33.513608	8.986260	Tunisia
Gueliada	33.566048	8.880516	Tunisia
Guettaya	33.675666	8.875957	Tunisia
Hamma (Djerid)	33.998347	8.157886	Tunisia
Hazoua	33.734690	7.598311	Tunisia
Hazoua 1	33.737810	7.611280	Tunisia
Hazoua 2	33.729979	7.589698	Tunisia
Helba (Djerid)	33.912140	8.121536	Tunisia
Ibn chabatt	33.910794	8.149617	Tunisia
Ibn Chabbat	33.935870	7.974872	Tunisia
Jehim (Djerid)	33.906444	8.127234	Tunisia
Jehim 2 (Djerid)	33.899839	8.123570	Tunisia
Jerba	33.826512	10.899060	Tunisia
Kebili	33.693821	8.971625	Tunisia
Kébili oasis	33.691919	8.969609	Tunisia
Kelwamen	33.480081	8.787483	Tunisia
Kettana	33.753822	10.201422	Tunisia
Klebia	33.526949	8.837839	Tunisia
Kostylya	33.947499	8.181417	Tunisia
Ksar Ghilane	32.981723	9.637026	Tunisia
Lazala	33.409522	9.022049	Tunisia
Limaguess	33.769965	9.084605	Tunisia
Limaoua	33.807007	10.135678	Tunisia
Mannsoura	33.729176	8.935287	Tunisia
Mareth	33.627241	10.288739	Tunisia
Matouia	33.966689	10.002497	Tunisia
Mdou	33.802783	10.073569	Tunisia
Medenine	33.335839	10.476344	Tunisia
Messa id	33.620148	8.957882	Tunisia
Metouria	33.549012	9.009952	Tunisia
Mides	34.409054	7.918945	Tunisia
Mrah Lahouar	33.859824	7.996662	Tunisia
Mrah Lahouara	33.866073	8.025428	Tunisia
Mzara	33.973909	7.643816	Tunisia
Nasrallah	35.352599	9.830127	Tunisia
Neflayet	33.974916	8.106016	Tunisia
Nefleyet (Djerid)	33.913195	8.111530	Tunisia
Nefta	33.861150	7.882884	Tunisia
Negga	33.740601	8.823958	Tunisia
Nouael	33.442967	9.02011	Tunisia
Nouail	33.492711	8.853833	Tunisia
Ouedhref	33.993069	9.975128	Tunisia
Ouled el ghrissi	33.755525	7.663703	Tunisia
Ouled Grissi	33.714908	7.655608	Tunisia
Ouled Melah	33.606337	9.026818	Tunisia
Oum somaa	33.785919	8.843558	Tunisia
Rabta	33.728280	8.919740	Tunisia
Rahmet	33.641827	8.990101	Tunisia
Rejim Maatoug	33.326387	8.026840	Tunisia
Sabria	33.352407	8.742471	Tunisia
Sakouma	33.496068	8.977634	Tunisia
Salah-Brika	33.568916	9.057060	Tunisia
Scast	33.608357	9.013892	Tunisia
Segdoud	34.302095	8.110498	Tunisia
Sif Lakhdar	33.858230	7.946607	Tunisia
Smida	33.471437	8.940580	Tunisia
Souk Lahad	33.774552	8.829247	Tunisia
Stiftimia	33.442894	9.034651	Tunisia
Tamaghza	34.382684	7.939700	Tunisia
Tamerza	34.382928	7.936909	Tunisia
Tarfaya	33.325626	8.579474	Tunisia
Tarlaya	33.475327	8.968244	Tunisia
Tazarit	34.038525	8.198777	Tunisia
Tazrarit (Djerid)	33.961412	8.217568	Tunisia
Teboulbou	33.837381	10.125622	Tunisia
Tifour	33.711024	8.901686	Tunisia
Tombar	33.723644	8.918306	Tunisia
Tozeur oasis	33.902500	8.145556	Tunisia
Zaafrane	33.446706	8.916017	Tunisia
Zarate	33.661919	10.357669	Tunisia
Zarcine	33.534233	8.820997	Tunisia
Zarzis	33.482619	11.092654	Tunisia
Zerkine	33.683597	10.230458	Tunisia
Amu Darya	39.137714	63.481492	Turkmenistan
Atamyrat	37.811554	65.225495	Turkmenistan
Birata	40.849974	62.002325	Turkmenistan
Farap	39.162886	63.587993	Turkmenistan
Garabekevyul	38.484606	64.167681	Turkmenistan
Khalach	38.088007	64.895820	Turkmenistan
Koytendag	37.494410	66.006128	Turkmenistan
Murghab River	36.479968	62.617972	Turkmenistan
Sakar	38.938304	63.775444	Turkmenistan
Sayat	38.800066	63.891308	Turkmenistan
Seidi	39.453228	62.979419	Turkmenistan
Tedjen	37.398606	60.480358	Turkmenistan
Al 'Ayn	24.174990	55.637628	United Arab Emirates
Al Jahili	24.215464	55.749285	United Arab Emirates
Al Muaiji	24.208510	55.701913	United Arab Emirates
Al Mutaredh	24.216353	55.742185	United Arab Emirates
Al Qattara	24.263582	55.750755	United Arab Emirates
Al'Ayn	24.216672	55.768363	United Arab Emirates
Hili	24.282656	55.771621	United Arab Emirates
Jimi	24.254716	55.745009	United Arab Emirates
Khatt	25.620355	56.007557	United Arab Emirates
Liwa	23.157048	53.756701	United Arab Emirates
Masafi	25.309422	56.163448	United Arab Emirates
Mleiha	25.134399	55.880413	United Arab Emirates
Shah	23.128392	53.916040	United Arab Emirates
Shemal	25.820015	56.028036	United Arab Emirates
Art Smith Trail Palms	33.671453	-116.408895	USA
Ash Meadows	36.464462	-116.323613	USA
Biskra Palms	33.790587	-116.250785	USA
Bogert Trail Palms	33.768569	-116.526190	USA
Borrego Canyon Palms	33.280416	-116.433217	USA
Corn Springs Palms	33.625760	-115.325523	USA
Cottonwood Springs Palms	33.736671	-115.809618	USA
Dead Indian Canyon Palms	33.701941	-116.372604	USA
Fortynine Palms Oasis	34.105906	-116.105016	USA
Hellhole Canyon	33.235464	-116.450434	USA
Hidden Palms	33.819770	-116.302060	USA
Hidden Palms Ecological Reserve	33.623235	-116.403370	USA
Kofa Mountains	33.361914	-114.098568	USA
Macomber Palms	33.798058	-116.256041	USA
Mountain Palm Springs Palms	32.864317	-116.233254	USA
Oasis Valley	37.004390	-116.723456	USA
Oswit Canyon Palms	33.780846	-116.578746	USA
Palm Canyon	33.735520	-116.537324	USA
Pushwalla Palms	33.824415	-116.281847	USA
Seventeen Palms	33.255062	-116.110797	USA
Thousand Palms Oasis	33.838062	-116.310570	USA
Willis Palms	33.826768	-116.331065	USA
Willow Hole Palms	34.068619	-116.153564	USA
Amudarya Bius	42.908667	59.212289	Uzbekistan
Amudarya River	37.235492	67.714363	Uzbekistan
Bukhara oasis	39.996280	64.402041	Uzbekistan
Dzhanafar	39.579894	63.955192	Uzbekistan
Karakalpakstan	42.737876	59.372495	Uzbekistan
Khorezm oasis	41.400590	60.403639	Uzbekistan
Nukus	42.410978	59.511598	Uzbekistan
Samarkand	39.748624	66.973377	Uzbekistan
Ma’rib oasis	15.425712	45.359424	Yemen
Shah’rut	16.565389	52.774194	Yemen
Uteq	16.649306	52.960889	Yemen
Wadi Mougaib	16.599250	52.890750	Yemen
Ain ba Ma’bad
al-Jawf
Bishah
Jabrin
Laila
Minna
Najd
Omani
Qusaibah
Saih
Sakhama
Selemiya
Sulayyil
Tabuk
Turaba
Yathrib
