# Supplementary material for: Mapping the global distribution and conservation status of oases—ecosystems of pivotal biocultural relevance
Source: PeerJ journal article supplement (doi:10.7717/peerj.18884), 2025-02-28
Supplement: Sup_Table_S7.xlsx [file Sup_Table_S7.xlsx]

## Sheet: Sheet1
Country	population_country	population_oases	area_country	area_oases	area_protected	population_oases_1km	population_oases_10km	trees	crops	grass	shurb	urban	bare	Protected	Human population
Algeria	381491.40	3360.46	2311174042474	1953078235	0	11224.39	40726.30	13.85	24.90	22.78	17.79	2.81	16.88	0	#REF!
Bahrain	19967.86	130.24	779800419	8957724	0	1136.02	14761.50	9.4	7.9	7	6.8	56.6	10	0	#VALUE!
Botswana	20742.75	97.11	579653629886	2920718533	893246	247.91	1821.10	23.12	4.98	31.28	36.84	0.31	1.30	2311174042474	#VALUE!
Burkina Faso	195953.09	0	274387433386	0	0	0	0	0	0	0	0	0	0	779800419	0
Cameroon	239752.60	3.89	466988479502	25269962	0	11.81	77.12	6.53	3.03	69.57	2.46	0	0.55	466988479502	3256800
Cape Verde	4525.00	17.18	4077450215	19265092	0	138.62	2603.21	11.85	5.1	29.1	22.85	1.95	3.5	4077450215	#VALUE!
Chad	142228.50	699.00	1275134411922	5250160201	0	1507.76	7776.56	4.87	12.61	56.86	7.51	0.03	2.38	1275134411922	#VALUE!
Cyprus	11552.39	236.46	9059084023	119871281	4895939	1104.13	6162.25	8.05	55.84	11.11	9.54	12.72	1.46	9059084023	#VALUE!
Djibouti	10027.83	77.69	21768760455	28338735	0	346.22	5636.02	6.82	12.13	35.65	24.62	0.82	18.20	21768760455	#VALUE!
Egypt	822970.61	506059.30	983531902106	40213719778	4439827	623534.84	802393.86	6.95	64.24	4.84	6.72	9.87	6.26	983531902106	#VALUE!
Eritrea	36232.51	165.48	120842211778	424923546	2882198	415.77	2334.50	8.68	9.46	36.73	16.76	0.06	24.50	120842211778	#VALUE!
Ethiopian	891661.97	1722.75	1133302407579	5257884589	106466332	3361.41	12367.15	12.69	7.40	35.19	34.25	0.05	9.05	1133302407579	#VALUE!
Iraq	382387.72	76284.87	437205410711	19845456596	256182529	132175.40	235929.83	7.50	53.90	16.45	8.77	3.73	6.54	437205410711	#VALUE!
Israel	75399.52	162.00	20771723913	199274910	0	786.43	23693.05	10.29	54.41	14.5	8.06	3.70	7.97	20771723913	#VALUE!
Jordan	61047.47	1103.32	89193792320	485779641	0	2928.73	26226.08	10.96	38.35	22.08	11.45	3.50	12.88	89193792320	#VALUE!
Kenya	474312.50	723.03	588673167664	718139968	107464097	2558.77	8356.60	18.04	6.96	36.87	30.48	0.37	6.17	588673167664	#VALUE!
Kuwait	30651.17	117.83	17286750110	92940052	0	411.36	4062.09	9.18	39.12	14.74	11.28	6.17	17.76	17286750110	#VALUE!
Libya	59224.08	8273.63	1617481470435	4552644062	0	36707.78	36707.78	7.05	43.50	16.76	10.48	8.86	12.44	1617481470435	#VALUE!
Mali	201651.52	898.80	1259522967325	1931905687	0	2418.03	10756.11	4.17	26.15	41.76	12.09	1.26	6.62	1259522967325	#VALUE!
Mauritania	38319.31	502.24	1040193984205	2003366552	0	1412.47	7857.80	5.58	22.81	39.56	14.56	0.25	8.23	1040193984205	#VALUE!
Morocco	306509.4	10723.58	414257631751	7001567332	35265847	31137.08	68139.69	13.93	19.91	28.48	25.01	2.06	8.54	414257631751	#VALUE!
Namibia	20683.18	39.73	826034656102	509891139	9181784	116.11	1017.90	8.10	10.01	36.56	22.52	0.49	18.14	1184397553189	#VALUE!
Niger	205456.82	1655.13	1184397553189	3020225038	0	3413.61	17150.58	6.06	21.22	43.19	10.59	0.57	6.58	912554103747	#VALUE!
Nigeria	1864231.89	2055.42	912554103747	4026521537	0	3278.19	8270.20	3.95	20.40	56.11	6.56	1.04	0.73	309227834096	#VALUE!
Oman	31810.14	2650.52	309227834096	2913890259	0	5960.47	23101.71	13.40	9.33	39.60	20.52	4.83	9.28	11671968585	#VALUE!
Qatar	58880.08	64.12	11671968585	41478985	0	449.27	20428.03	6.85	45.26	9.97	3.68	3.56	24.53	1928798526349	#VALUE!
Saudi_Arabia	317695.41	6385.82	1928798526349	11325540045	181154836	19104.43	124780.69	5.19	43.10	17.04	9.51	2.11	25.65	197005345380	#VALUE!
Senegal	139487.60	1442.58	197005345380	1525679430	89964409	2917.06	7513.98	5.42	32.93	35.28	14.31	0.66	6.84	636127790317	#VALUE!
Somalia	94847.46	1236.30	636127790317	14642021302	0	2189.77	10693.47	5.75	0.89	38.98	32.10	0.01	20.26	1835114308415	#VALUE!
South Africa	511082.51	1774.06	1221430339439	16485820524	117615199	5017.00	10614.63	6.43	7.67	44.96	27.30	0.62	9.84	187572060416	#VALUE!
Sudan	363486.93	22499.91	1835114308415	12608554782	0	43134.34	111605.34	5.46	45.04	24.26	8.25	1.52	7.33	155322657377	#VALUE!
Syria	229566.70	12375.17	187572060416	3825520324	0	29620.19	105124.80	2.84	70.75	8.27	5.02	5.47	4.43	70735767991	#VALUE!
Tunisia	99488.77	3676.26	155322657377	2877585683	0	9488.57	26919.29	11.84	26.64	22.40	17.26	7.69	13.17	454681894580	#VALUE!
United Arab Emirates	78229.02	1957.76	70735767991	325578372	2722753	9141.34	60951.82	12.28	22.28	11.16	5.17	25.41	19.76	5812693725.14	#VALUE!
Western Sahara	4168.65	0	269688632680	0	0	0	0	0	0	0	0	0	0	642093479197	0
Yemen	260721.82	34875.67	454681894580	12885579033	0	56916.19	134821.42	8.21	17.65	40.23	24.10	0.59	7.86	9342762470035
Palestine	30773.54	269.78	5812693725.14	75326236	0	673.56	3554.71	11.43	31.20	19.78	10.61	8.51	17.39	3157229968989
Afghanistan	261388.65	17257.14	642093479197	5780120360	105433857	33764.53	86936.53	4.33	68.22	10.35	6.59	3.41	5.71	1623301372493
Argentina	386935.13	16856.30	2779304287365	98087015945	366536579	42768.26	42768.26	2.75	1.90	35.95	47.72	0.67	9.62	2717868411627
Australia	180960.85	1002.22	7699189290364	406620841112				25.48	0.91	40.01	28.58	0.07	2.97	19804205542
Chile	177587.53	9303.89	738817251749	9894706972	92033343	18860.12	58061.82	12.25	12.90	28.01	29.99	1.85	14.11	873752205979
China	12388500.40	21400.84	9342762470035	12239130382	23094049	68224.64	269041.28	8.06	43.02	30.68	9.73	4.04	2.99	16823663193626
Ecuador	149512.55	229.40	255998469530	891450871	1018748025	957.53	3632.05	35.25	4.73	25.10	30.79	0.40	0.83	498000210899
India	12108564.55	25759.63	3157229968989	13275036922	0	46846.31	132068.03	3.91	76.9	4.53	6.13	2.85	5.0	488868218255
Iran	689801.45	37359.07	1623301372493	19212167845	29417092	105895.07	331647.13	10.36	44.81	21.96	9.97	3.35	8.25	448337203406
Kazakhstan	155857.15	2390.27	2717868411627	20447463043	56693647	6619.80	21018.84	2.91	20.54	62.15	8.80	0.53	1.55	141179416907
Kyrgyzstan	50841.27	1354.73	19804205542	647363880	3687740	3673.21	22396.48	9.75	38.72	29.01	6.66	12.12	2.52	0.569655
Madagascar	238508.86	0	592303356914	0	0	0	0	0	0	0	0	0	0
Mexico	1208744.49	7351.96	1959723851836	75066977411	868399905		120858.48	9.40	7.60	30.27	40.88	0.42	9.30	1.15683
Mongolia	27350.65	20.04	1560791919275	2190571700	203236509	89.78	965.54	0.86	6.5	76.16	3.14	0	7.82	9.27778
Pakistan	1989416.15	602134.12	873752205979	123343001495	5396577	773463.30	1057044.43	7.46	70.57	7.11	7.30	2.65	3.74	0.00437526
Peru	303905.02	16510.90	1297154827702	19572150044	383190896	36291.59	102286.91	20.20	13.37	30.32	26.34	1.04	6.70	1.95784
Russia	427849.89	559.06	16823663193626	5568071772		2509.86	7961.31	3.88	4.81	73.69	5.46	0.36	0.65	0
Spain	84984.69	217.42	498000210899	171502925	1600141	1000.74	11767.40	7.05	9.31	38.14	28.76	3.95	6.41	0.933011
Turkmenistan	84984.69	12788.36	488868218255	12797149729	65954009	33906.80	74626.66	2.15	66.79	13.52	8.61	3.37	4.67	0.51538
United States	3310000	50463.32	7781400382750	10094005895			369456.82	14.02	29.65	30.77	13.91	3.61	6.81	0
Uzbekistan	287633.98	68129.89	448337203406	23473678785	80869003	119306.5	171485.61	5.21	50.68	20.57	9.18	10.87	3.08	0.344509
Venezuela	273837.87	0	915896381593	0	0	0	0	0	0	0	0	0	0
Tajikistan	80343.76	8911.18	141179416907	2746161607	105433857	15690.67	29595.33	6.95	50.31	19.12	6.83	12.81	3.85
